# Supplementary material for: Inferring Atlantic salmon post-smolt migration patterns using genetic assignment
Source: R Soc Open Sci. 2019 Oct 2;6(10):190426. doi: 10.1098/rsos.190426 (PMC6837218; doi:10.1098/rsos.190426)
Supplement: Supplementary File 2 [file rsos190426supp2.xlsx]

## Sheet: info
Inferring Atlantic salmon post-smolt migration patterns using genetic assignment
Harvey A. C., Quintela M., Glover K. A., Karlsen, Ø., Nilsen, R., Skaala, Ø., Sægrov, H., Kålås, S., Knutar, S., Wennevik, V.

## Sheet: Baseline regions
30	1364	4	200	435	525	204
			Outlier	Inner	Middle	Outer
ID	Pop	SSsp2201	SSsp2201	SSsp2210	SSsp2210	SSspG7	SSspG7	Ssa202	Ssa202	SsaD144	SsaD144	SsaD157	SsaD157	Sp1605	Sp1605	Sp2216	Sp2216	Ssa14	Ssa14	Ssa171	Ssa171	Ssa289	Ssa289	SSsp3016	SSsp3016	Ssa197	Ssa197	SsaF43	SsaF43	SsOsl85	SsOsl85	MHC1	MHC1	MHC2	MHC2	EST107	EST107	EST19	EST19	EST28	EST28	EST68	EST68	Sleel53	Sleel53	Sleen82	Sleen82	SsOSL25	SsOSL25
OE16SS-024	Outlier	303	303	124	132	131	147	238	242	150	190	347	371	224	236	230	246	144	144	209	237	118	118	90	94	176	188	107	115	187	187	144	146	210	260	359	363	336	360	346	346	193	193	173	173	216	222	156	156
OE16SS-025	Outlier	287	347	124	152	123	135	238	258	178	178	351	359	224	236	230	250	140	140	213	217	0	0	90	126	188	228	109	115	189	197	146	162	210	280	359	359	320	352	346	360	191	193	173	173	222	222	154	156
OE16SS-026	Outlier	267	279	124	148	139	143	238	246	166	182	319	367	224	244	234	246	140	140	217	237	118	118	70	94	176	224	103	115	197	217	142	144	260	260	359	363	320	320	346	352	193	197	173	173	210	210	154	156
OE16SS-027	Outlier	259	299	128	148	131	135	238	254	182	186	311	339	224	244	234	242	140	140	219	221	118	122	86	90	196	244	115	121	189	195	134	134	260	290	359	359	340	360	346	352	191	193	173	175	220	222	156	158
OE16SS-028	Outlier	275	319	148	152	131	135	270	282	158	182	311	347	224	244	222	234	140	144	209	229	118	122	90	114	208	244	115	115	181	197	134	160	230	240	359	363	336	360	346	360	193	197	173	175	220	222	156	156
OE16SS-029	Outlier	283	283	124	136	131	131	238	250	122	162	363	371	224	244	214	250	140	144	217	241	118	118	90	94	184	248	115	115	181	195	134	142	230	280	359	363	344	356	346	346	191	193	173	173	222	222	154	154
OE16SS-030	Outlier	275	295	124	148	163	183	238	254	178	190	343	351	224	236	234	234	140	140	213	225	118	120	90	94	172	200	103	115	181	193	118	134	260	260	363	365	348	368	346	348	197	197	173	173	212	220	154	158
OE16SS-031	Outlier	275	299	124	148	131	143	238	238	130	130	347	351	224	224	242	242	140	140	209	221	112	118	90	114	184	244	115	115	197	201	160	160	230	290	359	363	336	360	346	346	193	197	173	175	216	226	154	156
OE16SS-032	Outlier	271	319	124	136	127	143	246	282	182	182	319	347	224	244	210	242	140	144	217	219	118	122	90	114	164	200	121	121	181	195	134	134	260	290	359	363	360	376	346	352	193	195	173	175	216	222	154	156
OE16SS-033	Outlier	299	299	124	128	131	143	246	250	158	218	311	371	224	244	222	250	140	140	229	241	118	120	86	90	200	248	115	115	181	195	142	146	250	280	360	363	344	356	346	360	191	195	173	173	222	222	154	156
OE16SS-034	Outlier	295	299	132	148	135	143	238	270	146	158	351	355	232	244	226	234	144	144	0	0	0	0	110	110	200	224	103	115	181	187	134	146	260	300	359	359	352	360	346	346	197	197	173	173	222	222	154	154
OE16SS-035	Outlier	275	295	124	148	151	171	242	242	126	150	331	359	224	244	230	230	140	140	0	0	0	0	90	94	184	200	115	115	187	217	134	140	260	290	363	365	368	372	346	348	193	195	173	175	220	222	156	156
OE16SS-036	Outlier	283	299	132	132	119	127	238	242	122	154	355	367	224	244	210	238	140	140	217	239	0	0	90	134	200	200	115	121	181	187	134	134	290	300	359	359	348	360	346	346	193	195	173	173	222	222	154	154
OE16SS-037	Outlier	275	291	124	148	131	143	238	242	130	162	347	351	224	244	222	242	144	144	217	219	0	0	90	90	164	200	115	115	181	195	146	160	230	290	359	359	356	360	346	346	193	193	173	173	222	222	156	156
OE16SS-038	Outlier	299	311	132	152	135	183	238	238	158	182	351	359	232	244	206	226	140	140	221	249	0	0	110	110	172	200	103	115	197	197	146	146	290	300	363	367	340	352	346	360	195	197	173	175	220	222	154	156
OE16SS-039	Outlier	299	299	124	148	131	135	238	246	122	158	331	351	224	224	234	234	140	140	217	241	0	0	90	90	200	248	115	115	0	0	142	142	230	250	359	363	348	356	360	360	191	191	173	173	222	222	154	156
OE16SS-040	Outlier	299	299	148	156	135	135	238	246	158	170	355	363	224	244	202	210	140	140	217	229	118	120	90	110	164	176	103	115	181	193	134	138	230	260	359	359	336	360	346	360	191	197	173	173	220	222	158	158
OE16SS-041	Outlier	299	335	124	148	127	135	250	254	130	186	351	351	232	240	234	234	140	140	217	225	118	120	90	118	176	196	103	103	181	187	118	142	210	240	363	367	348	356	346	346	191	197	173	173	210	222	156	158
OE16SS-042	Outlier	279	311	144	152	139	159	238	238	162	182	367	371	224	244	210	230	140	140	217	221	118	118	86	94	184	188	115	121	193	195	134	146	240	260	363	365	336	364	346	346	193	197	173	173	216	222	154	160
OE16SS-043	Outlier	299	311	132	156	131	139	254	254	138	158	307	319	224	249	234	234	140	144	233	237	120	122	90	90	200	200	103	115	187	195	134	142	260	260	359	360	340	360	346	346	193	197	173	173	216	226	168	172
OE16SS-044	Outlier	279	283	152	164	123	127	250	262	122	166	327	331	224	224	230	254	140	140	0	0	118	120	90	90	176	200	115	121	183	193	118	160	260	290	363	367	322	356	346	360	191	191	173	175	222	222	154	156
OE16SS-045	Outlier	283	287	144	164	127	135	238	270	126	166	303	331	224	232	202	242	140	140	213	249	120	120	90	94	188	188	115	121	181	187	142	144	260	260	365	367	372	376	346	352	191	197	173	175	222	226	156	158
OE16SS-046	Outlier	275	331	124	152	127	139	238	246	170	170	343	363	240	244	230	242	140	144	0	0	0	0	90	94	200	204	115	115	191	217	134	146	250	250	359	360	320	364	346	346	193	197	173	173	222	222	156	160
OE16SS-047	Outlier	299	303	148	152	147	191	238	238	162	182	355	363	232	244	222	234	140	140	217	221	118	118	90	94	196	200	121	123	181	217	142	142	250	370	359	360	320	364	346	360	191	197	173	173	210	222	154	156
OE16SS-048	Outlier	279	283	124	148	131	139	238	258	182	182	311	371	232	244	214	250	144	144	233	237	118	120	90	90	168	208	115	115	183	195	138	142	210	240	363	365	330	356	346	346	197	197	173	173	220	222	154	154
OE16SS-049	Outlier	279	331	132	152	135	139	238	238	170	170	343	363	232	240	230	246	140	140	229	249	118	118	94	94	176	196	103	115	181	193	146	146	210	250	365	365	352	360	346	360	199	199	173	173	222	222	160	168
OE16SS-050	Outlier	299	311	124	128	123	139	250	254	162	190	307	319	224	236	210	238	140	140	229	237	0	0	90	94	200	200	103	115	187	195	118	118	250	260	365	365	340	360	346	346	193	197	173	173	210	222	156	172
OE16SS-051	Outlier	303	307	132	148	131	183	238	246	146	186	319	359	224	244	214	226	144	144	209	237	118	118	90	90	168	192	103	115	193	217	142	142	260	260	359	363	336	340	346	346	193	193	173	173	212	222	156	174
OE16SS-053	Outlier	271	303	132	148	127	131	246	250	202	218	315	347	244	244	250	254	140	144	221	241	118	118	90	90	176	188	115	121	181	193	134	144	230	290	359	359	364	368	346	346	197	197	173	175	220	220	154	160
OE16SS-054	Outlier	299	327	132	144	127	131	234	262	166	174	319	355	232	236	198	206	140	144	213	217	118	118	90	90	188	188	115	123	181	195	146	148	240	240	359	363	336	336	346	346	197	197	173	173	222	222	154	154
OE16SS-055	Outlier	251	287	132	148	131	183	238	258	174	182	331	351	224	232	230	234	140	144	217	229	120	120	98	126	172	176	0	0	193	197	142	146	260	260	363	367	360	360	346	346	197	197	173	173	220	220	156	160
OE16SS-056	Outlier	295	303	124	144	143	167	258	258	174	174	343	355	232	244	230	234	144	144	0	0	0	0	94	98	184	188	115	121	181	193	134	146	290	290	363	367	320	360	346	346	197	197	173	173	220	222	156	160
OE16SS-057	Outlier	251	303	124	152	131	183	258	258	174	182	331	343	224	232	230	234	140	144	209	233	120	120	98	126	172	192	115	115	181	193	142	146	250	290	359	367	324	360	346	346	197	197	173	173	220	220	154	160
OE16SS-058	Outlier	291	291	136	144	127	155	246	246	202	218	335	347	244	244	234	250	140	144	0	0	0	0	90	90	176	184	115	115	181	193	134	142	260	260	359	359	364	368	346	346	191	197	173	175	220	222	156	160
OE16SS-059	Outlier	287	339	124	144	135	143	258	266	186	186	343	347	224	244	214	234	140	144	197	217	118	120	90	110	184	248	115	123	193	193	144	144	230	290	363	363	344	356	346	346	197	197	173	173	220	226	156	156
OE16SS-060	Outlier	251	287	132	152	139	167	258	258	174	182	331	343	224	224	234	242	140	144	0	0	0	0	90	90	172	192	115	117	193	193	142	146	250	260	363	365	324	360	346	346	197	197	173	173	220	220	156	160
OE16SS-061	Outlier	267	279	124	148	131	143	258	262	138	178	351	371	232	252	238	254	144	146	0	0	0	0	90	90	164	184	115	115	181	193	138	146	210	290	363	367	324	340	346	346	191	197	173	175	222	222	156	170
OE16SS-062	Outlier	299	307	124	124	127	143	266	266	122	154	351	355	244	248	234	254	140	144	217	233	118	118	90	90	188	200	103	117	187	191	118	142	230	240	363	367	340	376	346	346	191	191	173	173	210	222	160	166
OE16SS-063	Outlier	295	331	124	124	131	131	238	270	150	154	351	351	232	236	230	242	140	144	217	237	0	0	90	90	184	260	115	123	193	193	142	146	290	290	363	363	356	360	346	360	197	197	173	173	220	220	156	160
OE16SS-064	Outlier	287	303	124	152	135	167	238	238	122	174	335	343	224	232	242	250	144	144	217	233	0	0	90	90	172	204	115	115	193	193	142	146	250	290	359	363	340	360	346	346	191	197	173	173	220	222	154	160
OE16SS-065	Outlier	291	299	124	124	131	135	246	246	150	186	347	371	232	236	234	250	144	144	217	217	0	0	90	90	184	196	115	115	181	187	134	142	230	230	363	363	356	364	346	346	197	197	173	173	222	222	154	160
OE16SS-066	Outlier	299	327	124	152	127	135	234	258	138	190	347	371	232	244	218	230	140	144	197	213	120	122	90	90	168	248	103	123	193	195	142	160	250	260	359	363	340	360	346	346	193	197	173	173	222	222	156	160
OE16SS-067	Outlier	291	295	124	128	167	167	242	246	150	166	347	371	224	232	234	238	140	144	217	217	118	122	90	90	184	244	115	123	181	187	144	160	230	250	363	367	364	372	346	346	197	197	173	173	220	222	156	156
OE16SS-068	Outlier	263	287	132	152	131	139	238	258	174	182	347	351	224	232	230	234	140	144	217	229	120	120	90	126	176	184	115	117	193	197	142	146	250	290	363	367	360	360	346	346	197	197	173	173	220	220	154	160
OE16SS-069	Outlier	279	283	144	152	135	167	238	238	138	182	347	359	236	244	210	218	144	144	197	229	0	0	90	90	184	188	103	115	191	193	134	144	250	260	367	367	320	320	346	346	197	197	173	173	220	222	156	156
OS15SS-058	Outlier	295	315	132	144	127	131	238	266	150	174	355	359	224	236	230	246	144	144	217	217	118	118	0	0	196	208	115	123	0	0	134	144	240	260	367	367	328	368	346	348	197	197	173	173	220	222	156	174
OS15SS-059	Outlier	0	0	124	124	131	163	242	242	142	170	0	0	0	0	230	234	140	144	0	0	118	122	0	0	200	216	115	123	0	0	134	134	260	260	0	0	324	352	346	346	197	197	173	173	220	220	156	156
OS15SS-061	Outlier	0	0	0	0	127	143	238	270	150	178	287	287	224	243	0	0	140	144	0	0	118	118	0	0	188	188	121	123	0	0	142	146	230	250	359	363	340	360	346	346	197	197	173	173	220	222	154	156
OS15SS-062	Outlier	295	307	136	144	155	163	258	270	158	162	339	371	244	244	234	250	140	144	0	0	118	118	0	0	172	184	115	121	0	0	118	134	230	260	359	367	336	360	346	346	197	197	173	173	220	222	156	156
OS15SS-064	Outlier	279	303	144	148	135	183	246	258	142	190	367	395	224	228	242	242	140	144	0	0	118	120	0	0	188	248	115	123	181	199	142	160	250	260	363	367	332	332	346	346	193	197	173	175	220	222	154	156
OS15SS-065	Outlier	275	303	124	144	131	167	242	258	130	170	319	351	244	244	234	250	144	144	229	237	118	120	0	0	200	248	115	121	181	193	134	138	250	260	359	363	320	368	346	346	197	197	173	173	220	220	156	156
OS15SS-066	Outlier	287	287	144	144	139	183	238	246	170	190	339	395	224	244	230	242	140	140	217	229	118	120	0	0	188	188	115	123	193	193	142	142	260	290	365	365	360	360	346	346	193	193	173	173	222	222	154	156
OS15SS-067	Outlier	0	0	132	152	167	187	0	0	174	174	0	0	0	0	222	242	144	144	0	0	118	118	0	0	176	188	103	115	0	0	142	148	230	260	363	363	360	376	346	346	197	197	173	173	220	222	156	160
OS15SS-068	Outlier	279	287	144	144	131	183	238	246	190	202	343	371	224	232	230	242	144	144	217	229	116	120	0	0	184	188	115	115	181	193	142	146	250	260	359	367	360	360	346	346	193	197	173	175	220	222	154	156
OS15SS-069	Outlier	287	299	144	152	139	183	234	246	142	170	351	395	224	244	230	238	140	144	0	0	0	0	0	0	176	188	0	0	0	0	134	142	240	290	359	367	332	332	346	346	193	193	173	173	220	222	156	160
OS15SS-070	Outlier	287	303	124	148	127	127	238	242	122	154	0	0	0	0	218	238	140	144	217	229	118	120	0	0	188	188	115	121	193	193	134	150	240	260	359	367	320	356	346	346	193	197	173	173	220	222	154	156
OS15SS-071	Outlier	291	311	124	148	131	163	238	242	190	202	335	363	236	248	206	234	140	144	205	229	118	120	0	0	236	260	115	121	195	197	134	150	230	260	359	359	340	344	346	360	197	197	173	173	222	222	154	156
OS15SS-072	Outlier	291	299	124	144	159	167	258	266	154	198	343	347	224	244	234	234	144	144	217	245	118	122	0	0	188	188	123	123	181	193	144	160	230	290	363	363	356	364	346	360	193	197	173	173	220	222	156	156
OS15SS-073	Outlier	263	279	144	148	143	183	238	258	182	190	331	359	224	244	210	234	140	144	209	237	122	122	0	0	176	184	103	117	193	197	134	142	260	260	365	367	320	360	346	346	197	197	173	173	220	220	154	156
OS15SS-074	Outlier	275	311	124	148	131	135	262	262	150	190	351	371	244	252	234	254	140	144	221	233	122	122	0	0	176	188	115	121	193	195	134	138	210	290	359	363	368	368	346	346	191	197	173	175	222	222	156	160
OS15SS-078	Outlier	279	303	132	148	135	167	246	266	146	166	355	359	224	236	230	234	144	144	217	217	118	118	90	90	188	208	103	115	187	193	144	160	250	260	367	367	348	368	346	348	193	197	173	173	220	222	156	156
OS15SS-079	Outlier	275	291	124	144	131	143	238	242	142	190	339	347	232	244	230	234	140	140	237	237	118	120	0	0	188	224	103	115	193	193	118	134	230	250	359	365	320	356	346	346	197	197	173	173	220	222	156	156
OS15SS-080	Outlier	275	299	144	164	127	199	238	270	142	178	287	347	224	232	206	230	140	144	209	237	118	120	0	0	188	196	107	121	193	193	146	160	230	250	359	359	324	360	346	346	197	197	173	173	220	220	154	154
OS15SS-087	Outlier	295	299	124	144	131	131	238	266	154	174	319	359	224	232	0	0	144	144	217	237	118	118	0	0	168	188	0	0	187	193	134	144	240	280	359	367	324	368	346	346	0	0	173	173	222	226	154	156
OS15SS-101	Outlier	287	291	124	152	135	143	258	266	166	186	343	347	224	244	0	0	140	144	237	245	122	122	0	0	184	244	123	123	193	193	142	144	230	250	0	0	344	356	346	360	0	0	173	173	220	220	156	156
OS15SS-102	Outlier	279	283	124	136	143	167	0	0	166	190	371	371	236	244	0	0	140	140	197	233	118	122	0	0	188	248	115	123	193	193	134	144	230	230	359	363	360	364	346	346	197	197	173	175	220	222	154	156
OS15SS-103	Outlier	287	299	152	152	143	187	0	0	158	190	339	367	224	232	0	0	144	144	0	0	118	120	0	0	184	184	103	115	0	0	118	142	250	290	359	367	332	356	346	346	197	197	173	173	220	222	156	156
OS15SS-105	Outlier	291	299	124	128	135	167	0	0	186	198	343	347	0	0	0	0	142	144	217	217	118	122	0	0	184	196	115	115	181	187	0	0	230	230	0	0	356	364	346	346	197	197	173	173	220	222	154	156
OS15SS-107	Outlier	275	311	124	144	131	167	0	0	182	198	339	347	0	0	0	0	140	144	197	205	118	118	0	0	176	200	103	121	193	193	134	146	250	260	363	363	324	356	346	346	195	197	173	175	220	220	156	156
OS15SS-109	Outlier	287	299	124	148	131	131	238	242	142	190	347	359	216	236	234	234	140	140	213	237	118	122	0	0	188	216	121	123	191	211	142	160	250	280	363	367	344	360	346	346	197	197	173	173	220	222	154	156
OS15SS-110	Outlier	0	0	148	152	131	155	0	0	170	202	347	347	0	0	234	242	140	144	0	0	118	122	0	0	188	188	115	121	193	193	144	148	0	0	0	0	356	360	346	346	193	197	173	173	222	222	154	156
OS15SS-111	Outlier	287	291	144	148	131	155	238	258	190	202	363	371	232	244	230	234	140	144	217	233	118	122	0	0	188	188	115	115	181	193	134	144	260	260	359	367	344	360	346	360	193	193	173	173	220	222	154	156
OS15SS-112	Outlier	295	303	124	144	135	135	238	246	146	170	351	363	236	236	218	246	140	144	0	0	120	122	0	0	0	0	115	121	0	0	134	144	210	290	359	367	356	360	346	346	197	197	173	173	220	226	154	160
TY13SS-001	Outlier	299	311	124	164	127	179	238	238	150	150	303	347	224	244	234	242	140	144	213	229	116	118	0	0	176	176	115	121	187	195	134	158	210	260	359	359	332	380	346	352	197	197	173	173	210	222	156	156
TY13SS-002	Outlier	279	315	132	152	131	187	238	238	150	178	307	323	236	248	210	238	144	144	209	225	120	124	0	0	164	196	109	109	197	199	146	146	250	260	359	359	336	360	346	346	191	191	168	173	222	222	156	160
TY13SS-003	Outlier	291	311	144	144	127	135	258	266	166	174	351	379	244	252	250	258	140	144	0	0	116	118	0	0	0	0	115	123	187	191	118	146	250	280	359	363	368	380	346	346	197	197	173	173	222	222	156	166
TY13SS-004	Outlier	275	311	148	164	135	147	242	246	170	186	351	371	224	224	242	254	144	144	217	237	116	122	0	0	176	200	109	115	183	197	134	146	260	260	359	359	326	364	346	346	195	197	173	175	222	222	158	168
TY13SS-005	Outlier	275	323	148	152	135	187	246	250	114	166	347	359	244	252	222	226	140	140	213	229	118	118	0	0	196	256	109	115	195	197	134	158	260	290	359	365	322	340	346	346	197	197	173	173	210	222	156	166
TY13SS-006	Outlier	275	311	132	144	131	131	238	250	174	178	347	351	224	252	234	242	144	144	217	237	118	120	0	0	164	196	115	123	191	199	146	148	250	260	359	359	336	340	346	352	191	191	173	179	210	222	156	160
TY13SS-007	Outlier	291	311	148	160	127	139	246	258	138	154	339	343	224	224	226	230	140	144	217	225	116	118	0	0	176	200	115	115	183	183	146	158	230	260	359	367	360	368	346	346	191	197	173	173	220	226	154	154
TY13SS-008	Outlier	279	283	124	148	127	127	242	262	138	154	327	363	244	252	202	234	140	144	213	241	118	120	0	0	176	188	107	115	183	217	146	148	250	250	359	359	320	368	346	346	0	0	173	173	222	226	156	156
TY13SS-009	Outlier	275	279	124	148	127	179	242	254	154	190	351	363	224	244	238	254	140	144	213	241	118	118	0	0	172	200	107	115	183	217	134	148	250	360	359	363	320	368	346	352	191	201	173	173	220	222	156	156
TY13SS-010	Outlier	275	299	124	132	131	179	242	242	170	178	303	343	244	248	226	246	140	140	209	217	112	120	0	0	204	236	115	115	181	195	140	140	230	290	359	365	332	372	346	346	197	197	173	173	220	222	154	154
TY13SS-011	Outlier	275	275	132	148	163	179	238	242	170	170	323	343	236	244	226	230	140	140	209	213	116	118	0	0	184	204	115	115	181	191	140	142	230	260	359	363	332	340	346	360	197	197	173	173	222	222	154	158
TY13SS-012	Outlier	295	311	132	164	123	127	238	262	154	190	351	351	224	248	238	250	140	140	213	233	112	118	0	0	196	200	107	115	193	197	142	146	230	230	359	365	332	368	346	360	191	195	173	173	222	222	154	156
TY13SS-014	Outlier	291	303	144	148	127	131	238	242	154	162	351	359	224	244	206	246	140	144	217	217	118	118	0	0	200	236	115	115	187	191	118	134	290	360	359	363	336	356	352	360	199	199	173	173	222	226	154	156
TY13SS-015	Outlier	279	303	144	164	127	139	238	266	126	150	339	347	224	244	222	246	144	144	217	229	118	120	0	0	164	172	103	109	191	199	134	134	260	360	359	359	336	336	352	352	193	195	173	173	222	222	154	160
TY13SS-016	Outlier	283	303	144	160	127	147	238	238	162	186	339	347	232	244	222	250	144	144	213	217	118	120	0	0	172	200	103	115	181	191	134	140	230	360	359	359	340	364	346	352	197	197	173	173	222	226	154	154
TY13SS-017	Outlier	299	299	132	148	139	143	238	258	170	170	319	343	244	244	234	242	140	140	209	233	112	118	0	0	188	188	121	121	187	195	134	140	210	230	359	359	324	340	346	346	195	197	173	173	222	222	154	156
TY13SS-018	Outlier	291	303	144	148	127	127	238	254	162	166	339	347	224	244	206	234	140	144	217	217	118	122	0	0	172	176	103	115	187	193	134	144	250	250	359	363	336	356	346	352	193	197	173	173	222	222	154	156
TY13SS-019	Outlier	271	307	124	132	127	143	242	246	142	150	359	359	236	244	238	258	140	140	213	241	118	122	0	0	208	256	117	121	191	197	134	158	290	360	363	367	328	336	346	346	189	195	173	173	220	222	154	168
TY13SS-020	Outlier	0	0	0	0	123	143	238	246	162	198	327	339	224	236	230	230	144	144	0	0	0	0	0	0	0	0	115	121	0	0	134	146	260	260	359	365	360	360	346	346	191	197	173	173	220	222	154	156
TY13SS-021	Outlier	0	0	0	0	131	143	238	238	186	190	0	0	224	224	202	202	140	140	213	213	120	120	0	0	188	188	103	107	0	0	134	134	210	210	359	359	340	356	346	346	191	193	173	173	220	226	156	156
TY13SS-022	Outlier	275	303	136	152	143	143	238	246	178	206	327	351	224	236	226	234	144	144	221	229	118	120	90	94	188	188	115	115	181	181	134	142	230	260	363	365	322	352	346	346	191	193	173	173	216	222	156	156
TY13SS-023	Outlier	303	335	124	156	123	131	238	238	126	154	303	371	224	232	234	266	140	144	209	209	118	118	90	90	176	184	103	115	181	217	146	160	210	210	359	359	340	360	344	346	195	197	173	173	212	222	156	160
TY13SS-024	Outlier	275	311	128	148	135	143	246	262	114	142	331	375	224	224	234	242	140	144	217	237	118	120	90	102	176	176	115	115	197	197	134	160	260	280	359	359	364	364	346	360	191	193	173	173	222	222	156	166
TY13SS-025	Outlier	275	311	0	0	143	159	238	238	114	174	347	371	224	248	230	250	140	144	209	213	116	118	90	110	172	200	115	115	193	195	140	146	210	260	363	363	360	360	346	346	191	191	173	173	220	222	156	166
TY13SS-026	Outlier	275	323	124	152	135	143	238	242	162	170	343	351	224	244	234	238	140	140	209	209	116	118	90	102	180	188	109	115	187	195	140	148	230	260	359	359	332	372	346	346	197	197	173	175	212	222	154	156
TY13SS-027	Outlier	299	311	124	148	123	143	242	254	150	186	0	0	232	236	226	230	140	140	221	225	118	120	90	94	172	196	103	123	183	197	138	140	260	360	359	363	340	368	346	346	0	0	173	173	220	222	156	156
TY13SS-028	Outlier	299	299	132	148	147	163	242	246	186	206	327	351	236	244	226	230	140	144	233	241	118	120	90	102	172	188	103	107	181	193	134	134	230	260	359	367	326	360	346	346	191	193	173	173	222	222	156	156
TY13SS-029	Outlier	311	323	152	164	131	135	238	250	142	186	307	371	224	232	234	246	140	140	229	233	118	124	90	98	172	180	107	121	195	197	134	140	260	290	359	359	340	372	346	360	197	197	173	175	220	222	156	160
TY13SS-030	Outlier	295	299	132	148	147	187	246	266	178	206	327	371	224	244	234	246	144	144	221	241	116	118	90	90	172	188	107	115	181	193	134	142	210	260	359	367	322	360	344	346	191	197	173	173	220	222	154	156
TY13SS-031	Outlier	299	299	132	152	139	147	234	250	114	206	327	363	224	244	230	234	144	144	221	241	116	120	90	90	188	188	115	115	193	217	134	146	260	260	359	367	360	360	346	346	191	191	168	173	216	220	154	156
TY13SS-032	Outlier	299	331	144	148	143	143	238	242	150	174	331	351	232	244	226	254	140	140	217	221	120	120	94	126	188	196	103	115	183	191	140	146	250	260	359	367	340	368	346	360	193	195	173	173	222	222	168	168
TY13SS-033	Outlier	295	315	128	152	143	147	238	250	146	206	327	339	224	224	230	254	140	144	221	225	120	122	90	94	188	196	115	115	193	195	146	146	210	260	359	367	322	360	346	346	191	195	168	173	220	222	156	156
TY13SS-034	Outlier	271	271	144	156	123	167	238	238	114	166	339	347	224	224	202	222	140	144	217	219	118	118	94	110	176	188	121	121	193	197	144	148	210	250	363	367	360	368	346	346	191	197	168	173	222	222	154	160
TY13SS-035	Outlier	287	299	152	156	123	143	238	246	198	206	327	371	224	224	202	234	140	144	229	241	116	120	90	94	188	196	107	121	193	195	134	146	210	230	359	367	322	360	346	346	189	193	173	173	216	220	156	156
TY13SS-036	Outlier	287	299	144	148	127	159	246	258	158	198	331	351	224	224	242	266	140	144	217	233	116	118	0	0	0	0	0	0	0	0	0	0	0	0	359	359	364	368	346	346	191	197	173	173	220	222	154	160
TY13SS-037	Outlier	295	331	144	152	143	187	238	246	162	198	327	351	224	249	230	246	140	144	225	241	118	120	90	90	188	196	103	115	189	193	134	134	260	260	365	365	360	360	346	346	191	197	173	173	216	220	156	156
TY13SS-038	Outlier	275	299	140	164	131	143	254	266	154	190	319	371	244	252	238	246	140	144	217	233	116	120	90	126	164	176	107	121	183	199	134	146	260	260	359	367	336	368	346	346	191	191	173	175	220	222	156	160
TY13SS-040	Outlier	291	291	132	148	131	131	238	238	186	190	351	371	224	224	202	234	144	144	221	221	118	118	0	0	0	0	0	0	0	0	0	0	0	0	359	367	336	372	346	360	197	197	173	173	222	226	156	160
TY13SS-042	Outlier	279	331	132	136	127	147	242	254	134	138	319	339	244	244	226	258	144	144	221	225	118	118	0	0	0	0	0	0	0	0	0	0	0	0	359	359	368	372	346	346	191	197	173	173	220	220	156	156
TY13SS-043	Outlier	287	311	136	148	159	175	246	266	114	170	319	351	244	244	210	254	140	144	0	0	118	118	0	0	164	200	109	121	183	199	118	146	260	280	359	365	336	336	346	352	0	0	168	173	220	222	154	156
TY13SS-044	Outlier	0	0	132	144	131	159	238	266	150	174	347	347	224	252	210	230	140	144	225	229	118	120	90	90	164	168	121	123	187	197	142	146	210	250	359	359	324	340	352	352	191	199	173	173	222	222	156	160
TY13SS-045	Outlier	315	331	124	132	163	187	246	254	138	198	351	371	224	244	238	250	140	144	217	233	118	118	0	0	0	0	0	0	0	0	0	0	0	0	359	367	340	368	346	352	195	197	173	173	220	222	156	156
TY13SS-046	Outlier	275	295	136	152	143	147	250	258	162	186	327	339	232	236	226	230	144	144	225	241	118	118	90	94	188	196	107	115	181	193	146	146	260	260	363	367	322	360	346	346	191	197	173	173	222	222	156	156
TY13SS-047	Outlier	311	323	124	164	131	147	238	238	170	186	351	371	224	249	202	234	140	144	221	233	118	118	94	98	176	192	115	121	191	195	134	160	210	250	359	367	326	356	346	360	191	193	173	173	222	226	156	156
TY13SS-048	Outlier	311	323	124	136	147	159	258	266	114	174	339	347	224	252	242	254	140	144	225	229	118	120	90	102	168	200	109	115	195	197	142	146	280	360	359	363	340	364	346	346	191	191	173	173	222	226	160	168
TY13SS-049	Outlier	0	0	0	0	123	147	238	262	114	190	0	0	224	224	202	234	140	140	213	219	116	118	86	90	172	176	115	121	193	197	140	146	260	260	359	359	364	368	346	360	191	193	168	173	220	222	156	160
TY13SS-050	Outlier	303	311	124	132	123	143	238	238	158	174	347	351	224	249	230	254	140	140	213	245	116	116	70	130	184	200	115	121	191	195	142	146	260	360	363	363	352	352	346	346	191	191	173	173	220	222	154	166
TY14SS-001	Outlier	0	0	132	156	147	187	262	270	170	198	343	363	232	244	234	238	140	140	201	217	112	122	94	126	172	188	103	115	181	191	134	150	250	260	365	367	320	348	346	346	189	195	173	179	212	222	154	156
TY14SS-002	Outlier	0	0	124	140	159	159	238	254	0	0	323	359	248	252	250	254	140	140	229	233	118	122	90	90	200	200	115	121	181	217	118	146	210	210	359	359	0	0	346	346	0	0	173	173	220	222	156	166
TY14SS-003	Outlier	291	295	124	148	131	131	238	266	158	158	343	351	232	244	234	234	140	140	0	0	118	118	0	0	168	184	123	123	181	195	136	140	210	260	359	359	364	364	346	346	193	197	173	173	212	212	156	156
TY14SS-004	Outlier	291	323	140	148	187	187	238	246	166	182	303	343	244	248	246	250	140	144	201	221	116	118	90	114	168	196	115	121	181	181	134	140	240	260	359	359	322	348	346	346	191	197	173	175	222	222	156	156
TY14SS-005	Outlier	275	307	148	148	135	163	238	250	142	162	343	351	224	232	234	246	140	140	221	245	118	124	102	126	184	196	115	121	191	197	134	146	230	370	359	359	352	356	346	346	193	197	173	173	220	222	156	156
TY14SS-007	Outlier	299	331	144	152	143	187	238	250	158	206	327	351	224	249	230	242	140	144	225	241	118	120	90	90	188	196	103	107	181	189	134	146	260	260	365	367	352	360	346	346	197	197	173	173	222	226	154	156
TY14SS-008	Outlier	275	279	152	164	143	159	238	266	122	178	343	351	224	248	230	238	140	140	213	237	118	120	98	126	196	196	107	123	197	197	146	158	260	260	359	359	356	360	346	360	191	193	173	173	220	222	156	168
TY14SS-009	Outlier	0	0	140	148	143	147	0	0	178	186	0	0	224	244	226	250	140	144	217	233	116	120	90	90	200	200	115	115	191	197	146	146	260	260	359	359	328	332	346	346	191	197	173	175	220	220	154	166
TY14SS-010	Outlier	303	323	124	148	127	143	242	254	154	170	339	359	244	249	218	226	140	144	213	241	118	118	90	126	172	256	115	115	191	197	134	160	230	260	359	359	322	328	346	346	195	197	173	175	220	222	156	158
TY14SS-014	Outlier	291	307	132	148	127	139	0	0	0	0	327	347	0	0	234	254	140	140	0	0	118	120	114	126	196	256	115	123	181	195	144	146	0	0	359	363	0	0	346	346	0	0	173	173	222	222	156	156
TY14SS-017	Outlier	275	283	140	148	139	143	238	262	162	190	319	327	224	248	226	230	140	140	217	217	116	122	90	126	176	200	115	115	183	217	118	158	250	260	359	359	320	368	346	360	189	191	173	173	220	226	156	166
TY14SS-018	Outlier	275	311	124	132	143	155	246	254	150	178	347	347	0	0	230	230	140	144	209	225	116	118	98	126	164	192	115	123	191	197	146	158	260	360	359	363	340	368	346	346	0	0	173	179	220	222	156	156
TY14SS-019	Outlier	307	331	0	0	127	143	242	254	134	138	303	319	244	244	226	226	140	144	221	225	116	118	70	90	176	192	109	115	187	189	142	146	260	260	359	363	336	372	346	346	191	197	173	173	220	222	154	156
TY14SS-020	Outlier	299	311	124	152	143	143	238	242	150	186	347	351	224	244	254	254	140	144	233	237	118	120	102	126	164	188	103	123	181	197	0	0	260	260	359	363	0	0	346	346	0	0	173	173	220	220	156	168
TY14SS-021	Outlier	287	295	132	144	127	147	250	266	162	182	327	351	224	244	234	242	144	144	221	225	118	120	86	90	188	192	107	123	181	197	134	148	230	280	359	367	352	368	346	346	191	197	173	173	220	222	154	156
TY14SS-023	Outlier	323	331	132	164	131	143	238	238	114	166	335	351	216	232	234	234	140	144	221	221	116	118	86	90	192	196	103	115	183	187	134	144	260	290	359	359	336	356	352	360	191	197	173	175	220	220	154	154
TY14SS-024	Outlier	287	299	132	152	143	147	246	246	122	162	327	339	0	0	234	254	144	144	213	241	116	118	90	94	172	188	115	123	181	183	134	146	260	260	0	0	0	0	346	346	191	199	173	173	220	222	154	156
TY14SS-026	Outlier	259	259	132	148	147	187	246	250	162	170	0	0	0	0	0	0	140	144	221	233	118	120	90	90	176	188	107	115	193	201	142	146	230	260	0	0	352	380	346	346	0	0	173	173	216	220	154	156
TY14SS-027	Outlier	275	311	124	132	123	155	238	254	178	186	347	347	224	248	230	254	140	140	225	237	116	118	90	90	164	172	121	123	191	191	146	146	260	260	359	367	328	340	346	346	193	201	175	179	220	222	156	166
TY14SS-028	Outlier	259	331	124	144	131	131	238	242	178	178	327	331	224	224	218	226	140	140	225	225	116	118	94	94	168	188	115	115	181	197	142	146	230	260	359	363	340	368	346	360	197	197	179	179	220	222	154	156
TY14SS-029	Outlier	287	295	0	0	139	147	242	246	162	178	303	327	224	236	230	234	144	144	221	241	116	120	90	102	172	188	107	107	181	191	146	148	260	260	359	367	352	368	346	346	191	191	173	173	222	226	156	156
TY14SS-031	Outlier	275	295	0	0	143	143	242	250	162	186	327	351	224	244	226	230	140	144	221	233	120	120	0	0	188	188	107	115	183	193	134	140	260	260	359	367	360	368	346	346	193	197	173	173	220	222	156	156
TY14SS-032	Outlier	275	307	132	148	123	123	238	242	114	154	343	371	244	244	250	254	144	144	209	221	116	120	0	0	188	196	115	121	193	195	142	146	210	260	363	363	336	360	346	346	191	197	168	173	220	222	156	156
TY14SS-033	Outlier	275	307	132	152	123	131	238	246	126	162	303	371	224	232	234	266	140	144	201	209	118	118	90	114	176	184	103	115	195	217	148	160	210	260	359	359	340	360	346	346	191	193	173	175	220	222	156	160
TY14SS-034	Outlier	299	299	132	152	143	147	234	250	154	206	327	347	224	248	230	242	140	144	225	241	118	120	90	94	188	188	107	115	193	217	134	146	260	260	365	365	324	360	346	346	197	197	173	173	216	220	154	156
TY14SS-036	Outlier	291	315	144	164	131	187	258	266	178	198	327	351	224	224	234	258	140	144	209	209	118	118	0	0	196	236	115	123	181	191	138	140	260	260	0	0	322	372	346	346	0	0	173	173	220	222	0	0
TY14SS-037	Outlier	287	323	124	148	159	171	254	254	150	186	347	379	236	252	242	242	140	144	213	229	122	122	0	0	200	228	115	115	197	217	118	140	360	360	357	359	336	368	346	346	191	197	173	173	218	220	156	166
TY14SS-039	Outlier	287	319	124	156	127	159	238	258	154	186	339	355	224	224	202	250	140	140	217	229	116	118	90	94	168	168	121	121	195	197	140	146	210	360	359	359	340	360	346	360	199	199	173	175	220	222	156	156
TY14SS-040	Outlier	283	299	0	0	139	143	238	250	154	162	327	327	0	0	222	230	140	140	213	233	116	118	90	94	168	188	107	115	191	197	134	134	210	260	359	367	0	0	346	360	191	197	173	173	220	222	154	156
TY14SS-041	Outlier	287	287	136	144	127	143	238	242	134	178	351	351	244	244	230	230	140	144	213	225	118	118	90	90	196	196	115	115	189	197	134	136	260	260	365	367	364	368	346	346	191	197	168	179	220	220	154	156
TY14SS-042	Outlier	299	299	124	148	131	163	238	238	182	182	367	371	224	252	222	230	140	140	197	233	118	122	0	0	200	256	115	115	181	193	140	160	210	290	359	367	360	360	346	360	195	197	173	173	220	220	156	156
TY14SS-043	Outlier	299	311	124	132	139	179	254	266	126	170	359	363	244	248	238	242	140	144	217	233	118	122	0	0	168	200	103	103	181	195	134	136	260	360	359	359	340	340	346	346	191	197	173	173	222	222	156	166
TY14SS-044	Outlier	275	287	128	164	163	167	238	254	138	206	323	359	244	249	238	250	140	144	213	221	112	118	0	0	200	256	115	117	195	195	118	140	250	260	0	0	352	368	352	360	0	0	173	173	216	222	0	0
TY14SS-045	Outlier	287	291	132	148	127	131	238	242	134	170	339	339	224	236	230	230	144	144	213	217	0	0	90	90	176	196	115	115	195	197	136	146	260	260	359	365	364	368	346	346	195	197	173	173	220	226	154	156
TY14SS-046	Outlier	0	0	0	0	0	0	0	0	0	0	0	0	224	236	226	250	144	144	0	0	0	0	90	90	176	196	115	115	189	195	146	146	250	260	363	367	324	368	346	360	191	197	173	173	220	222	154	156
TY14SS-048	Outlier	263	267	124	156	127	127	238	258	154	186	339	355	224	224	250	266	140	140	217	233	118	118	90	94	168	196	115	121	193	197	140	146	210	360	359	363	322	340	346	346	199	199	173	175	220	222	156	156
TY14SS-049	Outlier	299	299	140	148	139	179	238	246	114	162	339	347	224	244	238	254	140	144	217	229	118	118	90	90	172	256	115	115	195	217	118	146	260	360	359	359	322	322	346	346	191	191	168	173	220	220	158	160
TY14SS-050	Outlier	307	335	124	156	127	131	238	246	126	162	303	371	224	232	238	266	140	144	201	209	118	118	90	94	168	196	103	115	181	195	142	148	210	210	359	359	322	364	346	346	191	195	173	175	220	222	156	160
TY15SS-001	Outlier	0	0	0	0	127	131	0	0	166	190	0	0	232	252	234	246	144	144	229	233	118	120	90	90	168	172	115	123	181	195	118	118	210	260	0	0	360	364	346	346	0	0	173	173	212	220	156	156
TY15SS-002	Outlier	263	307	132	148	171	187	246	254	126	186	323	351	232	244	234	234	140	144	201	229	112	118	90	90	184	196	103	115	193	197	136	164	260	360	357	363	336	364	346	346	193	197	173	173	210	218	154	156
TY15SS-003	Outlier	291	307	124	148	127	131	0	0	170	182	303	351	232	252	250	250	144	144	201	213	118	118	90	114	196	200	121	123	181	181	118	136	210	260	359	363	336	364	346	346	199	199	173	175	222	222	156	156
TY15SS-005	Outlier	287	315	124	164	139	159	254	258	170	182	359	371	224	224	230	242	140	144	213	233	118	118	90	94	200	200	115	115	181	195	118	160	210	290	359	367	360	364	344	346	191	197	173	175	0	0	156	156
TY15SS-006	Outlier	303	307	124	148	131	139	238	238	126	170	303	351	248	252	238	242	140	140	213	225	118	122	90	90	168	200	115	123	181	181	134	140	260	260	359	363	322	336	346	346	189	193	173	173	210	220	156	166
TY15SS-007	Outlier	263	291	124	148	171	187	238	254	154	182	303	379	232	244	238	242	140	144	201	229	112	118	90	90	168	196	115	123	181	197	136	140	210	360	357	359	322	336	344	346	197	197	173	173	218	222	154	156
TY15SS-008	Outlier	0	0	132	148	143	187	0	0	182	186	371	379	232	236	234	242	140	144	201	221	112	118	90	90	184	196	115	123	193	197	140	140	260	360	359	363	340	364	346	346	193	197	173	175	212	222	154	156
TY15SS-009	Outlier	303	323	148	152	131	143	238	254	154	182	343	379	232	236	234	250	140	140	201	229	118	122	90	90	196	196	115	123	197	197	140	164	230	260	0	0	322	336	346	346	0	0	173	175	212	222	0	0
TY15SS-010	Outlier	311	319	124	140	139	159	238	254	150	150	359	359	248	252	242	254	140	140	213	233	118	122	90	90	168	200	115	121	217	217	118	146	210	360	359	359	368	368	346	346	191	191	173	173	220	220	156	166
TY15SS-011	Outlier	299	311	124	124	131	139	254	266	150	182	359	395	224	248	238	242	140	144	229	233	118	122	90	90	168	200	115	121	199	217	118	140	290	360	359	359	336	340	346	346	189	191	173	173	220	222	156	166
TY15SS-012	Outlier	311	311	136	144	139	159	0	0	174	174	323	347	224	252	210	242	140	144	225	229	120	120	90	90	164	168	109	109	197	199	118	134	250	280	359	359	340	340	346	352	191	199	173	173	222	222	156	160
TY15SS-013	Outlier	307	307	124	148	131	139	238	246	150	182	351	371	248	248	234	250	140	144	201	233	118	118	90	90	184	200	121	123	181	197	134	140	240	260	359	363	336	364	346	346	0	0	173	175	222	222	156	156
TY15SS-014	Outlier	287	311	124	140	139	159	238	254	150	170	359	359	248	252	242	254	140	140	213	229	118	118	90	90	168	200	115	121	181	217	118	134	210	360	359	363	336	368	346	346	189	189	173	173	220	220	156	156
TY15SS-015	Outlier	279	319	124	164	127	143	238	242	174	190	347	355	224	244	226	230	140	144	213	233	112	118	86	90	176	176	115	115	195	199	118	138	230	230	363	365	340	372	346	346	191	195	173	173	210	222	154	156
TY15SS-016	Outlier	279	319	152	168	127	131	238	258	174	178	347	355	224	244	226	246	140	144	213	213	116	118	90	126	176	176	115	121	197	199	138	142	230	260	363	365	328	336	346	346	191	191	173	175	220	222	156	156
TY15SS-017	Outlier	295	323	148	148	143	187	238	254	154	182	323	351	236	248	238	242	140	140	201	229	118	122	90	90	184	196	115	123	193	193	136	164	240	360	0	0	322	340	346	360	197	197	173	175	210	218	156	156
TY15SS-018	Outlier	263	295	132	152	143	187	238	238	126	186	351	379	232	236	238	242	140	144	221	225	118	122	90	90	168	228	103	115	193	193	140	140	230	260	359	363	322	340	346	346	197	197	173	175	212	222	156	156
TY15SS-020	Outlier	263	295	148	152	131	171	246	254	182	186	323	371	244	248	234	238	140	144	201	229	118	122	90	90	168	196	115	123	193	197	140	140	230	260	357	363	340	364	346	360	197	197	173	175	218	222	156	156
TY15SS-021	Outlier	263	307	148	152	171	187	238	246	182	186	323	351	232	244	234	238	144	144	221	225	112	118	90	90	168	228	103	115	193	193	136	164	230	260	359	363	322	340	346	346	197	197	173	175	218	222	154	156
TY15SS-022	Outlier	263	295	148	152	131	171	238	254	126	154	371	379	236	248	238	242	140	144	201	229	118	122	90	90	184	196	103	115	193	197	136	140	230	240	357	363	322	336	346	360	193	197	173	173	218	222	156	156
TY15SS-024	Outlier	275	291	124	164	131	163	238	242	114	182	303	363	232	252	238	242	140	144	217	225	118	122	90	94	168	172	109	123	195	197	118	140	210	250	359	363	364	368	344	346	197	197	173	175	210	222	154	156
TY15SS-025	Outlier	299	311	124	152	127	127	238	242	170	182	323	371	232	248	238	250	140	140	213	233	122	122	86	114	200	244	115	121	217	219	134	146	260	290	0	0	364	368	346	346	0	0	173	173	218	220	156	166
TY15SS-026	Outlier	263	307	148	152	131	143	238	254	126	154	371	379	232	236	234	242	144	144	225	229	112	118	90	90	168	196	103	115	193	197	136	140	230	240	359	363	322	336	346	360	197	197	173	173	212	222	154	156
TY15SS-027	Outlier	291	303	124	148	131	143	238	246	182	186	303	343	232	252	234	250	140	144	217	225	118	118	90	90	180	196	121	123	183	197	136	146	260	260	359	359	364	364	344	360	191	197	173	175	210	210	156	156
TY15SS-028	Outlier	295	323	148	148	131	143	0	0	126	154	323	351	236	248	234	238	140	144	225	229	118	122	90	90	168	196	103	115	193	193	136	140	240	360	359	363	322	340	346	360	193	197	173	173	218	222	156	156
TY15SS-029	Outlier	263	307	132	148	143	187	0	0	126	186	323	351	232	236	234	242	140	144	0	0	112	118	90	90	168	228	103	115	193	193	140	140	240	360	359	363	322	340	346	346	193	197	173	173	210	218	154	156
TY15SS-030	Outlier	263	287	124	148	139	171	238	254	154	170	363	379	244	252	234	242	140	140	213	229	112	122	90	90	168	196	115	115	197	217	134	164	360	360	357	359	336	368	346	346	191	197	173	173	218	220	154	166
TY15SS-031	Outlier	307	323	132	148	171	187	238	246	126	154	371	379	232	236	234	234	140	144	201	229	112	118	90	90	184	196	115	123	193	197	140	164	260	360	357	363	322	336	346	346	193	197	173	173	212	222	154	156
TY15SS-033	Outlier	307	307	132	140	139	187	238	238	170	182	323	351	248	248	234	242	140	144	201	213	118	122	90	90	168	200	103	115	181	197	118	140	210	260	359	363	336	364	346	346	189	197	173	175	222	222	156	166
TY15SS-034	Outlier	263	291	124	152	131	143	238	238	182	186	343	379	232	244	242	250	140	144	221	225	112	118	90	90	196	196	115	115	193	197	140	164	210	230	357	359	340	364	344	360	193	197	173	175	210	212	154	156
TY15SS-035	Outlier	307	323	132	152	143	187	238	246	182	186	371	379	232	236	234	242	140	144	221	225	112	118	90	90	168	228	115	123	193	193	140	140	230	240	359	363	322	340	346	346	197	197	173	173	210	218	154	156
TY15SS-036	Outlier	275	287	124	132	139	187	238	254	130	150	347	351	0	0	0	0	0	0	0	0	0	0	0	0	168	176	115	115	181	199	118	146	290	360	359	363	336	368	346	346	191	195	173	173	220	220	156	166
TY15SS-037	Outlier	275	295	148	152	131	163	246	258	126	182	347	371	244	248	238	238	140	144	0	0	118	118	0	0	184	244	115	123	193	197	118	136	230	240	359	367	322	360	346	346	193	197	173	173	210	220	156	156
TY15SS-038	Outlier	0	0	148	168	127	131	246	258	178	182	331	351	224	232	234	246	140	144	201	237	118	118	90	90	168	256	115	123	193	195	140	142	210	240	363	363	360	364	346	346	191	197	173	175	222	222	156	156
TY15SS-042	Outlier	0	0	148	164	131	155	238	250	162	166	315	315	216	244	234	262	140	144	217	229	116	118	90	118	168	192	103	121	195	197	136	142	230	260	359	363	344	360	346	360	191	197	173	173	212	226	154	156
TY15SS-043	Outlier	311	323	128	148	139	143	238	238	138	170	0	0	224	224	222	226	140	140	0	0	120	122	0	0	176	196	103	115	191	197	134	146	230	260	359	363	340	364	346	360	191	193	173	173	220	222	154	166
TY15SS-044	Outlier	287	315	148	164	131	139	238	238	170	186	351	359	244	248	234	242	140	144	213	233	120	122	90	90	168	200	121	123	195	217	118	146	260	260	359	363	364	368	346	346	189	195	173	175	220	222	154	166
TY15SS-045	Outlier	275	275	124	132	127	143	238	242	186	190	0	0	244	244	234	234	140	144	217	233	118	118	90	94	188	200	103	115	187	197	142	148	240	360	365	367	360	364	346	360	199	199	173	175	212	222	156	156
TY15SS-047	Outlier	0	0	124	124	131	159	0	0	190	190	0	0	244	249	246	254	140	144	217	217	118	118	90	90	188	200	115	115	195	201	134	148	360	360	363	367	0	0	346	352	199	199	173	173	220	222	156	166
TY15SS-048	Outlier	0	0	140	148	131	159	0	0	0	0	0	0	249	252	250	254	140	140	217	229	118	118	90	90	184	200	115	121	181	197	146	146	210	260	363	367	0	0	346	360	0	0	173	175	220	222	156	156
TY15SS-049	Outlier	0	0	124	140	131	139	238	250	170	190	0	0	224	248	242	254	140	140	213	217	118	120	90	90	176	200	115	121	181	193	118	146	210	250	0	0	0	0	0	0	0	0	173	173	220	226	156	156
TY15SS-050	Outlier	275	283	148	148	159	159	238	258	174	190	311	359	244	249	226	254	144	144	209	221	118	122	86	90	188	204	115	115	183	195	148	164	250	260	359	359	0	0	346	346	0	0	173	173	220	222	156	160
STE17SS-001	Inner	307	319	124	136	123	127	250	254	182	190	319	351	216	244	230	238	144	144	217	229	120	122	90	90	180	240	115	115	195	217	134	158	240	260	359	367	322	356	346	346	191	197	173	173	210	222	156	156
STE17SS-002	Inner	291	315	132	168	123	163	258	290	154	182	331	347	224	236	218	226	140	140	217	229	118	118	90	90	192	196	115	115	195	195	146	164	230	230	363	363	336	340	346	356	191	197	173	173	224	226	154	172
STE17SS-003	Inner	275	303	132	152	127	131	258	290	130	138	307	307	244	244	206	234	140	140	209	217	118	122	90	102	200	200	115	115	187	217	134	164	260	260	359	363	332	352	346	352	191	201	173	173	222	226	158	158
STE17SS-004	Inner	263	279	132	152	143	163	238	238	142	178	335	351	224	244	242	254	140	140	203	213	116	116	0	0	0	0	0	0	0	0	140	142	0	0	365	365	356	360	346	346	191	195	173	175	218	222	154	156
STE17SS-005	Inner	275	303	152	164	163	163	238	242	142	166	311	311	224	244	206	242	140	140	203	235	112	116	90	122	192	244	115	115	181	195	144	146	230	230	359	359	326	356	346	346	191	193	173	173	220	222	154	156
STE17SS-006	Inner	255	291	152	168	131	163	238	238	126	134	351	383	224	236	226	234	140	140	213	233	122	122	90	102	172	256	115	121	181	187	142	146	230	230	359	363	332	368	346	346	191	195	173	175	220	220	156	158
STE17SS-007	Inner	275	275	132	152	179	191	238	242	142	166	315	331	224	244	214	222	140	144	229	235	112	118	98	126	172	208	103	115	181	187	140	144	230	360	359	363	344	352	346	346	193	195	173	173	222	222	156	156
STE17SS-008	Inner	275	295	124	132	127	131	238	242	170	182	315	363	236	248	218	226	140	146	233	235	118	126	90	90	172	204	103	115	181	187	140	164	260	360	359	363	336	344	346	346	195	197	173	173	222	222	154	156
STE17SS-009	Inner	295	323	132	164	163	171	258	258	174	206	343	343	224	232	226	238	140	140	209	217	118	120	90	90	176	188	115	115	191	191	140	148	260	280	359	363	336	340	346	360	191	195	173	175	222	226	154	156
STE17SS-010	Inner	295	335	124	132	163	171	246	254	170	190	303	323	244	248	238	254	140	144	217	221	118	122	94	126	172	188	115	121	181	181	146	160	230	240	365	367	356	356	360	360	193	197	173	173	222	226	154	172
STE17SS-011	Inner	299	299	124	124	127	163	238	262	130	154	347	355	245	252	222	242	140	144	221	235	122	122	90	90	188	244	103	107	197	217	144	148	210	240	363	367	320	322	346	360	191	193	175	175	210	212	156	160
STE17SS-012	Inner	303	311	148	152	127	163	242	246	162	174	331	343	244	252	234	242	140	144	217	229	118	122	0	0	0	0	0	0	0	0	0	0	0	0	359	365	340	360	346	352	191	191	173	173	220	222	156	162
STE17SS-013	Inner	287	295	124	168	127	143	246	246	178	178	335	351	236	248	206	210	140	140	225	233	116	122	98	118	208	216	115	121	189	201	138	144	230	260	359	367	336	364	346	346	193	197	173	173	220	222	156	158
STE17SS-014	Inner	267	287	124	136	147	187	238	246	166	170	335	339	224	248	230	242	144	144	221	237	118	120	90	90	172	200	115	121	195	197	142	160	260	360	361	365	340	372	346	346	191	197	173	173	220	220	154	168
STE17SS-015	Inner	255	275	132	132	127	163	238	258	154	182	335	351	236	248	214	226	140	144	225	235	116	118	98	126	172	224	115	115	193	197	142	146	360	360	359	359	324	364	346	346	193	197	173	173	220	226	154	156
STE17SS-016	Inner	303	315	128	148	127	135	238	258	190	194	335	347	224	236	234	242	140	140	209	217	118	122	98	102	164	184	107	115	191	197	142	146	210	250	359	359	360	368	346	346	197	197	173	173	222	226	154	158
STE17SS-017	Inner	263	287	124	144	143	143	238	258	166	174	355	367	224	244	226	230	140	144	209	237	112	118	90	90	180	196	115	121	191	197	118	148	230	260	359	363	336	360	352	360	197	197	175	179	212	222	154	156
STE17SS-018	Inner	259	311	132	148	163	163	238	258	126	198	315	379	236	249	210	226	140	140	221	225	118	122	94	102	192	200	115	121	187	189	142	146	260	290	363	363	324	368	346	346	191	195	173	175	212	220	154	156
STE17SS-019	Inner	267	279	152	156	147	187	266	274	118	134	299	363	232	236	222	242	144	144	203	213	118	118	86	90	192	196	103	115	187	193	146	158	260	280	359	363	322	372	346	346	191	191	168	173	220	220	154	156
STE17SS-020	Inner	251	315	152	152	163	163	250	262	134	134	327	355	224	244	222	242	140	144	229	233	118	118	0	0	0	0	0	0	0	0	0	0	0	0	359	363	360	364	346	346	191	197	173	173	212	224	138	172
STE17SS-021	Inner	263	307	124	152	127	131	250	266	154	166	335	339	244	252	234	246	140	140	221	221	118	126	102	134	188	200	103	103	181	217	136	140	240	260	359	359	356	364	346	358	193	197	173	175	220	226	156	156
STE17SS-022	Inner	295	323	128	132	147	179	238	270	138	166	319	343	224	249	234	246	140	140	203	203	118	118	90	110	188	192	115	115	193	197	134	142	210	260	359	360	344	364	346	352	197	197	173	173	222	222	158	172
STE17SS-023	Inner	263	279	124	144	131	163	238	238	174	190	347	387	224	224	234	242	140	140	209	229	112	118	90	90	196	196	103	121	187	191	134	148	230	240	359	365	0	0	0	0	197	197	0	0	0	0	154	156
STE17SS-024	Inner	275	295	132	148	135	147	242	274	142	162	339	347	224	232	222	234	140	144	225	229	118	120	86	90	172	192	115	115	191	197	134	158	230	280	363	367	326	372	346	360	191	195	173	173	220	220	154	168
STE17SS-025	Inner	283	295	148	152	123	167	0	0	110	182	0	0	224	236	218	234	140	144	213	229	116	116	94	94	168	200	103	121	193	199	140	142	260	290	359	367	332	336	346	352	191	193	173	173	220	222	138	154
STE17SS-026	Inner	287	307	124	124	163	163	234	242	166	190	307	339	244	252	226	254	144	144	229	233	120	124	90	126	168	188	103	115	183	195	134	146	210	250	359	363	336	340	346	360	195	197	173	173	212	220	162	172
STE17SS-027	Inner	295	303	132	148	147	163	238	242	134	142	347	363	232	253	234	246	140	140	209	229	118	120	86	90	172	184	115	115	187	197	136	158	230	280	363	363	326	336	346	360	191	193	168	173	220	222	168	168
STE17SS-028	Inner	271	335	148	164	127	143	258	270	170	198	331	383	224	224	222	234	140	140	203	203	118	118	0	0	0	0	0	0	0	0	0	0	0	0	359	360	340	368	346	346	191	201	173	173	220	222	154	154
STE17SS-029	Inner	263	287	124	144	171	171	254	258	138	154	351	367	244	244	230	254	144	144	213	229	118	118	90	114	180	228	115	115	193	197	118	148	230	260	359	367	352	360	360	360	191	197	173	175	220	220	154	156
STE17SS-030	Inner	287	307	124	132	127	131	0	0	158	198	351	403	220	244	242	258	140	144	0	0	118	120	94	94	164	184	115	115	187	195	142	164	230	260	359	360	336	364	346	360	193	197	173	173	220	222	156	174
STE17SS-031	Inner	267	291	136	152	143	183	238	250	130	134	307	327	228	236	250	258	144	144	0	0	118	118	90	122	208	216	121	121	197	217	142	158	210	260	359	365	344	360	346	352	193	195	173	173	220	226	156	168
STE17SS-032	Inner	263	323	144	148	131	139	238	250	114	174	311	355	224	249	242	246	140	140	217	229	118	122	70	90	168	196	115	115	191	197	142	148	230	250	363	365	322	336	346	352	191	197	173	175	220	220	156	156
STE17SS-033	Inner	259	323	148	152	171	187	238	238	170	186	331	359	224	224	238	246	140	144	0	0	116	118	90	90	168	204	115	115	195	197	132	148	230	260	359	363	336	352	346	346	195	195	173	173	220	226	154	156
STE17SS-034	Inner	263	267	144	168	139	143	238	250	130	206	343	351	224	232	234	238	140	140	217	225	118	122	86	86	168	188	115	115	193	195	140	146	250	280	359	365	320	330	346	346	197	197	173	173	222	222	156	170
STE17SS-035	Inner	283	287	128	152	143	183	238	262	122	170	335	387	224	232	222	242	140	140	209	217	118	120	110	114	184	196	115	115	191	195	142	146	250	280	359	359	364	372	346	352	193	197	173	173	222	226	154	154
STE17SS-036	Inner	259	323	124	136	127	143	238	238	154	190	347	355	224	228	250	254	140	144	0	0	0	0	0	0	0	0	0	0	0	0	0	0	0	0	361	365	344	356	346	360	193	201	173	173	220	220	156	158
STE17SS-037	Inner	279	299	128	152	143	171	246	262	154	162	319	367	236	244	226	250	140	144	209	237	118	118	90	94	188	192	115	115	189	197	134	142	210	210	359	363	360	364	346	360	197	197	173	175	212	222	154	156
STE17SS-038	Inner	283	299	132	148	131	135	258	258	166	174	359	379	236	244	226	230	140	140	0	0	0	0	94	126	196	244	115	115	187	197	118	140	260	290	363	367	320	320	346	346	195	197	173	175	210	222	156	172
Unknown_1	Inner	275	335	124	152	131	175	242	246	174	182	339	363	224	236	226	246	140	140	229	235	0	0	90	126	176	192	121	123	187	195	144	146	280	280	359	363	344	368	346	360	191	191	173	173	212	222	154	156
Unknown_10	Inner	275	303	148	148	143	191	238	258	142	174	315	331	224	224	214	242	140	140	217	229	0	0	90	102	192	196	115	115	191	193	142	146	260	280	359	359	326	364	346	346	191	193	173	173	220	222	156	162
Unknown_11	Inner	263	275	128	128	127	127	246	266	122	218	299	335	224	244	222	230	140	140	221	229	0	0	90	94	164	168	115	115	181	197	146	148	260	290	359	363	364	368	346	348	193	193	173	175	220	222	154	156
Unknown_12	Inner	295	323	148	148	131	143	242	250	170	170	355	363	244	248	210	238	140	144	217	231	0	0	90	90	176	204	103	121	187	217	144	164	250	260	363	363	336	372	346	360	191	201	173	173	222	226	154	154
Unknown_13	Inner	275	307	124	128	139	147	238	246	154	210	339	359	224	224	230	230	140	144	217	221	0	0	90	90	168	204	115	121	189	195	164	164	210	280	363	363	322	364	352	360	191	197	173	173	220	222	154	172
Unknown_14	Inner	271	291	148	152	163	163	238	258	130	194	319	339	224	240	246	246	140	140	221	229	0	0	0	0	192	216	121	121	189	193	146	164	260	290	359	363	368	400	346	360	191	193	173	175	210	220	154	156
Unknown_15	Inner	275	319	132	152	131	131	242	270	126	194	343	363	224	244	238	254	140	140	213	233	0	0	102	126	168	196	103	103	187	195	140	142	280	360	359	367	340	360	346	346	193	195	173	173	220	222	154	156
Unknown_16	Inner	267	279	128	148	127	131	238	254	198	218	335	363	224	236	230	250	140	144	217	233	0	0	94	94	196	244	115	115	195	197	144	146	260	290	363	367	320	320	344	352	191	193	173	175	222	222	154	156
Unknown_17	Inner	295	323	132	152	143	147	262	270	138	166	343	343	224	249	246	246	140	140	209	213	0	0	90	90	188	192	103	115	189	197	140	142	230	260	359	363	372	380	346	346	195	197	173	173	220	222	154	154
Unknown_18	Inner	259	275	148	164	163	163	238	238	134	166	359	367	224	224	218	242	140	140	213	229	0	0	90	126	176	176	107	115	187	195	146	164	260	280	359	359	326	352	360	360	197	197	173	175	220	226	154	154
Unknown_19	Inner	275	279	124	164	135	163	238	258	166	174	367	367	224	232	218	242	140	140	213	229	0	0	90	98	172	176	103	115	187	195	140	146	260	260	359	359	326	352	346	346	193	197	173	175	220	226	154	154
Unknown_2	Inner	259	275	124	152	143	159	242	274	174	194	307	351	228	244	234	242	140	144	0	0	0	0	102	102	168	200	115	121	181	183	136	140	230	260	359	363	364	372	346	346	191	201	173	173	212	220	154	156
Unknown_20	Inner	271	323	128	132	131	147	246	246	154	178	311	315	224	244	206	238	140	140	0	0	0	0	90	106	172	188	115	115	0	0	134	148	260	370	359	365	320	322	346	346	191	197	173	173	220	222	156	156
Unknown_21	Inner	323	335	132	152	127	131	242	270	186	190	303	343	244	244	234	238	140	140	213	229	0	0	98	126	168	196	103	115	195	197	140	146	280	360	359	367	340	360	346	346	193	197	173	173	222	222	154	158
Unknown_22	Inner	271	279	124	132	143	163	242	250	154	154	311	319	224	249	222	250	140	144	217	229	0	0	90	130	184	188	115	115	191	191	136	142	260	280	359	359	326	352	346	352	191	197	173	175	212	220	154	172
Unknown_3	Inner	255	291	148	152	147	163	238	258	126	166	315	351	236	252	222	250	140	140	217	221	0	0	102	102	192	192	115	121	181	189	142	142	230	290	359	363	332	368	346	346	195	195	173	175	220	222	156	158
Unknown_4	Inner	291	323	132	152	127	143	238	254	122	166	339	343	224	224	210	246	140	140	203	217	0	0	102	110	196	200	103	115	187	197	146	146	210	290	359	360	332	360	346	346	191	193	173	173	222	222	156	158
Unknown_5	Inner	283	291	132	148	123	163	238	238	162	174	339	363	224	236	222	250	140	140	217	229	0	0	90	98	184	188	103	121	191	195	142	164	240	260	363	367	336	340	346	352	191	197	173	173	222	226	168	172
Unknown_6	Inner	263	287	148	168	127	143	238	246	142	166	303	327	232	244	222	226	140	144	221	229	0	0	90	126	204	256	109	121	191	191	142	146	230	280	359	363	320	336	346	346	191	195	173	173	212	220	154	172
Unknown_7	Inner	287	295	124	152	143	171	238	258	162	166	319	335	236	244	246	250	140	144	203	213	0	0	90	90	188	192	115	115	187	197	134	142	230	260	359	363	340	364	346	360	197	197	173	179	212	212	154	154
Unknown_8	Inner	287	311	124	132	163	171	0	0	142	154	355	359	224	252	234	250	140	144	0	0	0	0	0	0	192	224	115	115	187	195	136	146	210	360	365	365	324	364	352	360	193	197	173	173	222	226	154	172
Unknown_9	Inner	279	335	124	152	127	143	242	270	174	198	331	339	224	244	234	242	140	144	229	235	0	0	102	114	176	200	115	121	181	187	148	164	230	260	359	363	368	372	346	346	193	195	173	173	212	220	154	154
GR17SS-012	Inner	263	271	148	152	127	163	0	0	150	174	279	363	224	244	226	254	140	144	213	241	120	120	102	102	168	184	103	115	195	199	140	164	260	260	359	365	320	356	352	380	191	193	173	173	220	222	156	172
GR17SS-013	Inner	275	291	148	152	147	183	0	0	138	190	335	339	224	248	0	0	144	144	0	0	0	0	0	0	184	256	0	0	0	0	134	142	260	260	359	365	356	360	346	346	193	197	173	173	212	222	158	168
GR17SS-014	Inner	263	315	152	152	135	183	0	0	142	150	279	351	224	252	222	242	140	144	213	225	120	120	90	110	168	192	103	115	181	197	140	164	230	260	359	367	356	360	352	380	193	201	173	173	220	222	154	156
GR17SS-016	Inner	283	299	140	152	163	167	0	0	146	174	311	319	224	236	202	246	140	140	229	237	116	122	90	90	204	228	115	121	187	189	142	146	240	290	359	359	364	364	346	352	191	191	173	173	222	222	156	170
GR17SS-017	Inner	295	295	152	164	127	183	0	0	138	190	335	339	224	248	222	226	140	144	207	217	120	122	90	90	196	256	115	115	197	197	134	142	260	260	359	367	356	360	346	360	191	197	173	173	222	222	156	156
GR17SS-018	Inner	287	307	140	152	131	167	0	0	130	150	311	343	224	236	246	246	140	144	217	237	116	120	90	90	196	204	115	121	189	195	118	142	240	260	359	365	360	364	346	360	193	197	173	173	222	222	170	172
GR17SS-001	Inner	295	311	132	152	127	163	238	238	146	154	319	351	216	244	234	250	140	140	221	233	120	120	90	102	188	200	103	103	193	195	148	160	210	280	365	367	0	0	0	0	191	197	0	0	0	0	154	156
GR17SS-020	Inner	303	335	148	152	127	159	0	0	182	182	339	339	224	244	246	246	140	140	0	0	118	120	0	0	188	260	0	0	187	197	134	146	0	0	359	367	336	352	352	360	191	197	173	173	210	214	154	172
GR17SS-021	Inner	283	307	124	132	127	163	0	0	138	166	351	359	224	224	210	226	140	140	0	0	0	0	0	0	204	244	0	0	0	0	136	140	0	0	359	359	320	364	346	346	189	191	173	173	220	222	156	156
GR17SS-022	Inner	275	339	132	164	123	163	0	0	130	174	347	359	224	244	246	250	140	140	217	233	120	122	0	0	164	192	0	0	181	191	136	142	260	360	363	363	336	372	346	360	197	197	173	173	222	222	156	156
GR17SS-023	Inner	251	279	148	152	135	147	0	0	170	174	315	315	244	252	226	246	140	144	217	221	120	122	0	0	192	208	0	0	195	197	142	142	0	0	359	359	0	0	0	0	191	195	173	173	0	0	156	172
GR17SS-024	Inner	259	311	128	152	127	167	0	0	134	154	327	351	236	244	230	238	140	144	221	233	118	118	0	0	176	192	0	0	0	0	146	148	0	0	359	367	322	356	360	360	197	197	173	173	216	220	154	172
GR17SS-026	Inner	299	311	148	148	143	143	0	0	158	182	311	331	249	252	226	238	140	144	225	225	118	118	90	90	168	196	103	115	187	191	164	164	250	260	363	367	360	364	346	346	193	193	173	175	212	226	138	156
GR17SS-029	Inner	315	323	124	152	131	159	0	0	190	198	311	327	244	244	230	238	140	140	217	237	118	118	0	0	184	192	0	0	187	197	140	148	250	250	365	365	336	348	346	346	195	197	173	173	220	220	156	156
GR17SS-002	Inner	275	283	132	144	183	187	0	0	166	178	363	363	224	224	230	234	140	140	203	241	116	118	90	90	172	200	0	0	181	193	142	146	230	250	359	363	336	368	346	346	193	197	173	173	220	222	154	160
GR17SS-030	Inner	271	283	148	152	163	163	0	0	126	186	319	379	224	244	250	250	140	144	217	229	118	122	90	90	168	228	0	0	191	191	146	146	250	250	359	367	330	364	346	346	193	193	173	175	210	226	154	156
GR17SS-033	Inner	279	299	148	152	131	131	0	0	166	174	299	335	236	244	238	238	140	144	209	213	116	118	90	110	180	188	0	0	181	195	158	164	240	260	365	365	320	320	346	346	191	193	173	173	220	222	172	172
GR17SS-036	Inner	275	279	132	164	127	159	0	0	146	190	303	363	244	244	0	0	140	140	0	0	0	0	0	0	184	192	0	0	187	187	140	142	260	260	359	365	326	332	346	352	191	191	173	173	210	222	156	172
GR17SS-039	Inner	295	307	124	152	127	183	0	0	170	174	351	355	224	232	222	230	140	144	221	237	118	118	90	90	172	200	103	115	181	187	140	164	260	290	359	365	352	360	346	346	191	193	173	173	220	222	154	158
GR17SS-003	Inner	283	299	148	152	163	167	0	0	146	150	311	319	224	236	202	246	140	140	233	233	118	118	90	90	204	252	0	0	187	189	136	146	240	240	359	365	364	364	346	352	191	191	173	173	222	222	156	172
GR17SS-040	Inner	267	275	124	152	143	163	0	0	166	186	331	359	224	228	242	250	144	144	221	229	116	118	98	98	164	168	103	107	187	191	140	146	210	260	361	363	320	356	346	346	193	197	173	175	222	224	154	156
GR17SS-041	Inner	275	279	124	152	143	143	0	0	126	186	335	363	236	252	226	246	140	140	213	229	118	122	0	0	176	216	0	0	181	195	142	146	210	230	359	367	332	344	346	360	191	193	173	175	210	226	154	156
GR17SS-042	Inner	303	303	148	152	123	167	0	0	134	186	315	339	232	236	230	246	140	144	0	0	116	116	0	0	192	192	0	0	181	187	142	148	0	0	361	363	344	356	346	346	197	197	173	175	220	220	154	158
GR17SS-043	Inner	283	299	132	148	159	167	0	0	182	210	307	347	244	244	246	250	140	140	229	233	116	118	0	0	200	212	0	0	181	181	118	146	0	0	359	363	360	372	346	352	191	197	173	173	222	226	156	156
GR17SS-047	Inner	287	323	124	152	163	183	0	0	122	142	335	343	244	249	238	246	140	140	203	233	116	120	90	90	168	192	103	115	181	193	148	164	260	290	363	367	344	364	344	346	191	193	173	173	212	222	154	156
GR17SS-048	Inner	259	275	132	168	127	147	0	0	122	146	299	327	224	224	206	226	140	144	217	237	116	122	0	0	184	248	121	121	0	0	142	142	0	0	359	359	352	356	346	346	191	193	173	177	222	226	154	172
GR17SS-049	Inner	275	323	148	148	127	127	0	0	174	186	347	363	244	244	230	254	140	140	203	233	120	122	0	0	164	184	115	115	187	191	146	158	230	260	359	365	326	360	346	346	191	195	173	173	210	220	156	156
GR17SS-004	Inner	275	279	124	124	131	131	0	0	170	170	343	343	236	236	242	242	140	140	213	213	118	118	0	0	244	244	0	0	181	181	122	142	250	250	365	365	360	360	0	0	193	199	0	0	0	0	158	158
GR17SS-050	Inner	279	291	132	152	127	163	0	0	186	186	335	359	252	252	226	258	140	144	0	0	118	118	94	94	184	204	0	0	195	217	138	146	230	260	359	365	352	360	346	346	193	197	173	175	220	222	156	168
GR17SS-051	Inner	279	279	148	152	127	183	0	0	130	198	323	331	224	224	202	254	140	144	0	0	0	0	0	0	204	248	0	0	199	199	140	164	0	0	359	365	340	364	346	346	191	197	175	179	220	222	154	156
GR17SS-052	Inner	279	335	132	164	131	163	0	0	146	150	319	371	224	244	238	242	140	144	0	0	118	120	90	90	180	200	0	0	195	195	140	142	0	0	359	365	322	344	346	352	191	191	173	177	210	222	154	172
GR17SS-053	Inner	255	307	128	168	131	143	0	0	182	186	315	391	224	244	222	238	140	140	0	0	0	0	90	90	176	192	0	0	195	199	146	164	230	230	359	365	352	360	346	346	197	197	173	173	220	220	154	156
GR17SS-057	Inner	283	299	148	152	131	143	0	0	166	194	327	351	224	249	222	242	140	144	217	229	120	120	90	90	188	200	0	0	181	191	146	164	230	280	359	360	320	322	352	360	193	197	173	173	220	222	154	156
GR17SS-058	Inner	267	299	132	136	135	163	0	0	138	166	327	351	224	248	202	242	140	140	217	221	120	120	0	0	176	220	0	0	191	195	140	144	260	360	359	363	320	356	346	346	191	197	173	173	210	220	154	156
GR17SS-067	Inner	279	303	128	164	127	187	0	0	166	186	299	339	236	244	230	254	140	144	217	221	120	120	0	0	168	176	0	0	181	197	118	118	210	290	359	359	364	364	346	360	191	193	173	175	220	220	156	160
GR17SS-074	Inner	307	307	132	164	131	139	0	0	146	190	347	347	236	248	230	250	140	140	217	229	116	118	126	130	172	200	103	121	191	205	134	162	250	260	359	359	320	360	346	346	193	197	173	173	222	222	168	168
GR17SS-075	Inner	275	347	124	128	163	179	0	0	186	198	343	363	224	244	250	250	144	144	209	233	118	118	0	0	176	188	0	0	0	0	146	146	0	0	363	363	336	368	346	346	195	197	173	173	220	222	154	156
GR17SS-077	Inner	279	327	124	132	135	159	0	0	134	186	0	0	232	244	226	246	140	144	217	237	118	118	0	0	184	188	115	115	183	197	134	146	250	250	363	363	344	368	346	360	191	193	173	173	212	220	166	170
GR17SS-079	Inner	259	303	140	148	183	191	238	238	186	190	339	363	0	0	0	0	0	0	0	0	0	0	90	90	176	192	121	121	181	181	134	138	260	260	359	367	356	360	346	352	193	193	173	173	210	226	154	154
GR17SS-081	Inner	251	283	148	148	163	171	0	0	174	178	343	367	232	244	238	238	140	140	213	229	120	120	0	0	192	256	0	0	0	0	142	142	230	260	359	363	326	336	346	346	191	193	173	173	222	222	168	172
GR17SS-083	Inner	275	279	124	148	131	183	0	0	178	186	343	363	224	232	226	226	140	140	221	221	116	120	94	94	172	180	115	121	187	197	118	134	230	250	359	363	360	368	346	346	191	197	173	173	222	222	154	156
GR17SS-084	Inner	303	307	128	132	131	143	0	0	182	210	307	307	244	244	222	238	140	140	221	233	118	118	94	102	248	256	103	117	181	197	144	164	260	360	363	363	352	372	352	380	197	201	173	173	222	222	154	156
GR17SS-086	Inner	259	267	124	132	143	159	238	238	118	134	343	355	240	252	242	250	140	144	217	221	116	116	90	98	188	192	107	115	187	189	134	148	210	250	0	0	320	340	346	360	0	0	173	173	212	222	0	0
GR17SS-087	Inner	323	327	124	132	127	127	238	258	154	174	339	379	244	244	234	238	140	140	217	235	118	120	86	106	168	172	103	115	181	195	146	164	260	360	357	363	312	336	0	0	191	197	0	0	0	0	154	160
GR17SS-089	Inner	275	303	124	124	147	163	258	258	146	154	327	339	244	248	226	242	140	144	229	237	118	120	90	126	192	204	103	121	181	191	146	154	260	280	359	363	326	356	346	352	193	197	173	173	220	222	156	162
GR17SS-008	Inner	0	0	152	152	131	131	238	238	162	162	343	343	224	224	234	234	140	140	213	213	118	118	62	94	176	176	0	0	179	195	114	142	250	250	365	365	0	0	0	0	191	199	0	0	0	0	156	156
GR17SS-090	Inner	251	315	132	148	127	135	238	258	150	198	311	319	244	244	234	250	140	140	217	229	120	120	90	90	188	188	103	107	191	195	146	146	230	370	359	359	344	364	346	346	193	197	173	173	220	222	154	172
GR17SS-091	Inner	279	311	124	144	127	143	238	262	166	194	323	351	224	224	222	242	140	140	217	221	116	118	90	102	196	216	121	121	195	197	134	144	210	250	359	367	324	360	352	352	197	201	173	173	222	222	154	154
GR17SS-092	Inner	271	331	124	152	131	163	238	250	142	174	339	343	224	252	222	234	144	144	229	233	116	118	94	102	184	256	103	121	181	189	146	162	260	260	361	367	336	356	346	346	197	201	173	179	222	226	154	154
GR17SS-093	Inner	275	295	124	144	131	187	238	242	158	170	0	0	244	244	238	254	144	144	213	225	118	120	90	90	196	208	0	0	0	0	118	140	260	260	363	363	344	360	346	346	191	197	173	175	220	222	154	154
GR17SS-009	Inner	275	311	124	124	127	187	0	0	154	202	335	355	244	244	242	242	140	140	217	229	120	120	90	90	168	196	121	121	181	181	134	164	260	360	363	369	326	336	346	352	191	201	173	173	222	222	154	160
GR17SS-102	Inner	279	287	128	148	127	127	246	258	150	198	319	347	236	252	226	230	140	140	217	229	116	116	90	90	176	224	103	115	191	217	118	140	210	280	359	365	360	364	346	352	195	195	173	175	220	222	156	166
GR17SS-103	Inner	279	303	124	148	127	131	238	258	174	186	339	343	224	252	222	230	140	144	209	221	118	122	90	146	184	188	103	121	181	191	146	146	250	260	359	363	352	360	346	346	191	193	173	173	220	222	154	168
GR17SS-105	Inner	287	291	124	164	127	131	246	274	166	186	343	375	236	240	226	234	140	144	229	229	116	118	90	94	176	196	103	115	187	197	140	140	210	260	359	359	320	352	346	360	195	197	173	173	220	222	154	166
GR17SS-106	Inner	275	275	124	124	127	143	238	242	142	170	319	351	240	244	226	230	140	140	217	219	122	122	90	90	196	196	103	103	181	195	142	160	260	260	359	363	326	380	346	352	193	193	173	175	220	220	154	168
GR17SS-107	Inner	283	287	132	152	127	131	238	250	154	178	339	351	224	244	206	238	140	140	229	235	118	118	94	102	176	188	115	115	0	0	144	146	230	360	359	363	326	344	346	346	191	197	173	173	212	222	154	158
GR17SS-108	Inner	275	307	124	136	131	143	238	250	122	142	319	371	232	244	226	234	140	144	217	233	118	118	90	90	172	196	121	121	197	197	148	164	260	260	359	365	352	352	346	346	191	193	173	173	220	226	154	168
GR17SS-110	Inner	295	299	128	152	127	143	238	262	118	186	343	375	224	244	238	242	144	144	221	229	118	120	86	102	168	192	115	121	181	217	142	146	230	290	359	359	324	336	346	346	197	197	173	175	210	222	156	168
GR17SS-112	Inner	263	279	128	128	127	167	250	258	150	210	359	367	224	236	222	226	140	140	209	229	118	120	90	126	192	252	103	115	187	197	140	158	210	240	359	363	360	368	346	346	195	197	173	173	210	222	156	168
GR17SS-115	Inner	275	279	148	168	135	171	238	238	178	186	339	363	236	248	230	246	140	140	213	221	116	118	94	94	196	204	109	115	187	217	118	164	260	290	363	365	332	356	346	346	197	201	173	173	222	222	156	158
GR17SS-117	Inner	283	303	132	132	131	143	238	242	162	178	303	351	236	248	238	254	140	144	221	233	116	120	90	102	168	172	103	115	195	217	146	146	230	250	359	363	326	372	346	346	191	197	173	173	222	222	154	156
GR17SS-119	Inner	307	311	152	168	131	143	246	258	190	210	339	391	232	244	246	250	140	140	229	229	118	120	90	98	192	200	115	121	181	199	146	146	230	260	363	363	344	372	346	360	197	197	173	173	222	222	156	168
GR17SS-121	Inner	255	299	152	152	131	135	242	250	166	186	347	351	224	236	234	234	140	144	217	225	116	118	82	90	192	200	107	115	191	193	138	146	240	280	359	359	332	348	346	346	191	197	173	175	220	220	154	154
GR17SS-122	Inner	0	0	132	152	131	163	0	0	174	190	0	0	224	244	0	0	140	140	0	0	118	118	0	0	184	224	103	103	0	0	134	142	0	0	359	363	322	326	346	352	191	193	173	173	210	220	154	156
GR17SS-123	Inner	295	323	124	152	123	171	242	258	142	142	335	359	244	244	234	234	140	140	203	217	118	122	90	102	192	256	103	115	0	0	118	140	230	260	359	365	324	360	346	346	191	191	173	173	220	220	158	162
GR17SS-124	Inner	275	299	132	132	127	167	238	258	122	190	339	351	224	244	202	226	140	144	225	229	118	122	90	94	172	192	115	121	181	195	118	144	240	280	359	365	320	360	352	360	191	197	173	173	210	220	156	162
GR17SS-126	Inner	283	291	124	132	143	167	250	254	166	170	327	363	224	224	238	242	140	140	209	221	120	122	90	118	168	176	103	121	197	197	146	146	250	260	359	363	364	368	346	346	191	197	173	173	222	222	158	160
GR17SS-127	Inner	275	291	124	132	155	179	238	242	186	186	335	363	224	236	230	250	144	144	229	235	118	118	94	126	196	256	115	115	191	195	146	164	260	280	359	363	336	340	346	346	191	197	173	173	222	222	154	156
GR17SS-128	Inner	319	319	132	152	127	171	250	262	146	154	307	315	236	248	206	246	140	140	213	229	118	120	0	0	176	192	115	115	0	0	140	144	0	0	359	363	336	340	346	380	191	197	173	173	220	222	156	156
GR17SS-129	Inner	251	303	124	148	147	187	250	266	134	174	339	363	232	244	222	234	140	140	217	217	118	118	102	110	184	196	103	115	181	191	146	164	210	290	359	363	336	356	346	346	191	195	173	173	220	226	156	158
GR17SS-131	Inner	259	323	124	152	143	183	242	262	186	198	343	359	224	249	0	0	144	144	225	229	0	0	90	90	176	200	103	115	197	197	148	164	260	360	365	365	324	360	346	346	191	197	173	173	220	222	154	156
GR17SS-132	Inner	295	323	148	148	127	175	238	262	142	142	311	351	224	244	222	230	140	144	221	229	122	122	90	110	176	224	115	115	191	217	134	144	210	260	359	363	344	360	346	346	195	197	173	173	216	222	156	172
GR17SS-133	Inner	259	291	128	152	167	183	238	246	154	158	315	319	224	248	206	246	144	144	213	221	118	122	90	90	184	188	103	115	195	197	146	148	210	360	359	365	336	360	346	380	191	191	173	173	220	222	156	156
GR17SS-134	Inner	283	315	124	128	131	131	238	250	198	198	315	343	236	240	234	254	140	140	213	213	118	118	86	86	168	196	103	121	193	195	144	146	230	360	359	359	356	368	346	346	191	193	173	173	220	220	154	156
GR17SS-135	Inner	283	311	124	148	175	183	238	238	142	178	327	359	244	248	254	254	140	144	225	229	116	118	90	90	224	248	103	115	197	197	148	164	210	260	363	365	336	360	346	346	193	197	173	173	212	222	156	168
GR17SS-136	Inner	307	307	124	128	127	171	238	266	142	186	351	355	244	249	0	0	144	144	221	235	118	118	0	0	184	256	0	0	0	0	134	148	230	230	363	365	364	368	346	380	191	197	173	173	220	220	154	156
GR17SS-137	Inner	291	307	132	148	127	143	238	250	170	186	335	359	224	224	0	0	144	144	217	217	120	120	0	0	196	204	103	107	181	181	148	164	230	260	363	365	336	360	346	346	191	193	173	173	222	222	154	154
GR17SS-138	Inner	275	327	132	136	131	171	246	246	162	174	339	363	224	248	230	230	140	144	229	229	118	120	0	0	176	196	103	115	187	197	142	164	230	260	363	365	372	376	352	360	195	197	175	175	222	222	154	156
GR17SS-139	Inner	255	259	124	136	127	143	242	262	146	198	307	315	224	236	242	246	140	140	213	213	118	120	102	110	188	192	115	123	195	197	140	164	260	290	359	365	340	360	346	346	191	197	173	173	220	222	156	156
GR17SS-141	Inner	295	319	132	148	143	175	242	242	122	142	327	343	236	244	246	254	0	0	221	229	116	120	86	90	168	192	115	115	191	195	144	148	260	360	0	0	340	360	346	360	193	193	173	173	216	222	0	0
GR17SS-142	Inner	255	319	124	132	127	171	0	0	122	198	307	315	236	248	0	0	140	140	213	229	118	120	0	0	176	184	115	123	189	197	148	164	260	260	363	363	336	352	360	380	191	197	173	173	220	222	156	158
GR17SS-146	Inner	267	295	124	136	131	163	0	0	178	194	343	343	224	244	0	0	0	0	213	225	0	0	90	94	188	192	115	115	187	197	142	148	210	250	359	365	326	356	346	360	193	197	173	173	222	222	158	172
GR17SS-147	Inner	279	279	124	152	127	155	0	0	138	166	287	311	232	248	0	0	144	144	225	229	0	0	0	0	184	188	103	115	0	0	134	134	230	230	359	363	336	360	346	346	193	197	173	173	212	220	156	156
GR17SS-152	Inner	279	315	148	148	123	143	0	0	162	166	327	363	224	249	0	0	140	144	209	217	0	0	94	134	192	212	103	121	181	187	140	140	260	290	359	361	340	372	352	360	191	191	173	173	220	222	156	176
GR17SS-154	Inner	267	307	124	124	131	183	0	0	198	218	0	0	224	228	0	0	140	144	217	225	118	118	90	106	168	188	115	115	0	0	146	148	0	0	359	365	328	360	346	346	191	197	173	173	222	222	154	156
GR17SS-158	Inner	251	303	148	152	143	163	238	238	110	126	339	339	236	248	214	222	140	140	221	225	118	122	90	98	200	256	115	121	195	195	118	164	230	360	359	363	352	356	346	346	193	197	173	175	220	222	154	158
GR17SS-159	Inner	0	0	124	148	143	143	0	0	142	174	0	0	224	224	0	0	140	140	213	217	0	0	90	114	192	200	115	121	0	0	146	146	230	230	359	363	0	0	346	346	191	201	173	173	220	222	156	170
GR17SS-160	Inner	267	315	152	164	143	183	0	0	118	138	327	339	232	248	0	0	140	140	217	225	0	0	0	0	176	200	115	121	0	0	144	146	0	0	359	363	352	356	346	346	191	191	173	173	220	222	158	158
GR17SS-096	Inner	263	295	124	152	127	143	238	242	178	198	315	363	224	224	214	234	140	144	203	241	118	118	90	102	172	256	115	115	181	195	140	148	230	240	363	367	336	352	346	346	193	197	173	173	212	220	154	154
EFE14SS-001	Inner	287	323	148	152	143	183	246	262	166	190	339	339	224	244	210	234	140	144	217	225	118	122	90	90	184	196	115	121	189	195	148	164	360	360	363	365	322	368	346	346	191	195	173	175	222	222	154	168
EFE14SS-002	Inner	255	307	124	152	163	163	258	290	142	174	331	351	224	236	226	246	140	144	213	217	118	120	102	106	192	200	115	115	187	191	134	140	230	260	359	359	320	344	346	348	197	197	173	173	220	222	154	174
EFE14SS-003	Inner	275	299	124	132	127	147	238	266	142	166	323	335	236	244	206	226	140	140	209	229	118	122	90	114	168	192	115	121	187	193	134	142	290	360	363	365	332	356	346	346	191	197	173	175	210	220	156	156
EFE14SS-004	Inner	283	299	128	152	183	187	242	246	146	182	319	323	224	244	242	242	140	140	213	229	116	124	98	106	196	224	103	115	181	187	140	144	280	280	359	363	356	360	346	360	197	197	173	173	222	222	154	156
EFE14SS-005	Inner	255	307	136	152	123	131	242	262	174	222	351	363	224	236	238	250	144	144	217	237	118	118	90	90	248	252	107	121	187	195	134	134	230	250	359	365	318	336	346	346	191	197	173	173	222	226	156	156
EFE14SS-006	Inner	0	0	148	148	127	127	242	246	154	162	319	327	224	224	218	242	140	140	213	217	116	120	0	0	168	196	103	115	195	195	146	164	230	260	359	359	340	372	346	360	191	197	173	175	220	222	154	156
EFE14SS-008	Inner	271	279	132	152	127	187	238	238	110	142	331	339	224	244	230	234	140	144	213	225	116	116	94	126	180	200	103	121	191	195	134	146	260	260	363	367	332	352	346	346	197	197	173	173	210	220	154	154
EFE14SS-009	Inner	275	291	144	148	123	143	238	238	110	178	347	379	232	244	238	242	140	144	235	235	122	122	90	90	192	196	115	115	195	195	146	146	260	280	363	367	326	352	346	346	195	197	173	173	220	222	158	160
EFE14SS-010	Inner	291	295	124	164	127	147	238	258	174	190	315	359	224	236	230	242	140	144	225	229	118	120	90	94	200	244	115	123	191	197	140	142	290	360	359	359	324	360	346	360	197	197	173	173	220	220	156	158
EFE14SS-011	Inner	279	331	124	152	143	187	238	258	138	190	331	375	244	249	246	254	140	144	213	225	112	118	90	90	188	200	103	115	195	197	134	164	230	250	359	359	326	340	346	346	191	197	173	173	222	226	138	158
EFE14SS-012	Inner	271	323	128	152	127	163	238	262	146	174	331	343	224	236	230	246	140	144	217	217	118	122	90	90	188	248	121	121	187	187	118	134	210	260	359	360	318	372	346	346	191	197	173	173	222	222	156	156
EFE14SS-013	Inner	267	291	140	148	131	179	238	258	178	202	303	339	224	244	242	254	140	144	203	221	118	120	90	94	168	204	103	103	195	199	134	164	230	260	359	365	352	368	346	352	191	197	173	175	210	222	156	156
EFE14SS-014	Inner	307	315	148	148	183	183	242	266	134	198	315	371	224	252	230	230	140	144	203	213	118	122	90	94	196	240	121	121	195	201	134	142	260	360	359	363	368	368	346	360	191	195	173	173	222	222	154	156
EFE14SS-015	Inner	287	295	132	148	147	183	238	258	170	198	331	371	224	232	230	242	140	144	217	217	118	118	94	94	188	240	103	115	189	195	142	164	260	280	365	365	356	368	346	346	191	195	173	173	220	222	156	158
EFE14SS-018	Inner	295	335	128	148	131	143	258	262	154	186	299	343	224	244	210	222	140	140	225	233	118	122	98	122	168	188	103	115	195	217	140	164	260	280	359	363	336	356	346	346	197	197	173	173	220	222	152	156
EFE14SS-019	Inner	319	323	136	148	123	187	242	254	166	190	319	355	224	244	230	242	144	144	213	229	118	122	0	0	184	196	0	0	0	0	134	144	280	360	359	365	332	356	346	346	191	197	173	173	212	222	156	168
EFE14SS-021	Inner	275	315	148	148	127	183	242	266	138	154	339	343	224	244	222	238	140	144	213	217	118	126	90	126	172	196	103	115	187	195	140	142	260	360	359	363	360	368	346	360	193	197	173	173	220	222	156	158
EFE14SS-022	Inner	275	319	124	148	127	183	238	246	150	186	315	335	236	244	230	242	144	144	221	237	118	118	90	98	168	248	103	121	187	195	160	164	280	280	359	359	356	364	346	346	195	197	173	173	216	226	156	156
EFE14SS-023	Inner	323	323	124	136	147	163	238	242	142	166	335	383	224	236	230	242	140	140	213	217	118	120	90	102	188	192	115	115	187	197	118	154	240	250	359	367	326	372	346	346	195	201	173	175	210	226	156	156
EFE14SS-025	Inner	299	327	148	148	143	171	242	246	142	142	347	359	224	240	234	234	140	140	209	213	118	122	90	90	176	184	115	121	187	189	140	148	360	360	363	365	356	360	346	346	191	195	173	175	222	226	154	158
EFE14SS-026	Inner	275	291	148	148	143	163	242	266	142	166	319	355	224	224	230	230	140	144	217	225	120	122	90	90	196	240	115	115	181	195	144	164	250	360	359	359	332	360	352	352	193	197	173	173	210	212	154	156
EFE14SS-027	Inner	275	303	132	148	127	143	258	262	142	142	359	367	224	224	230	242	140	140	217	225	116	122	90	130	172	196	115	115	193	195	118	146	260	360	363	365	332	332	346	346	193	193	173	179	212	222	156	156
EFE14SS-028	Inner	323	351	124	164	163	171	250	262	150	178	327	335	224	244	222	226	140	144	213	229	118	120	90	102	192	256	103	103	191	197	134	146	260	260	363	363	336	356	0	0	191	191	173	173	222	222	154	156
EFE14SS-030	Inner	295	311	132	152	147	155	238	246	190	190	339	355	224	248	222	242	140	140	197	233	116	118	90	90	172	172	115	115	187	191	142	164	230	250	359	359	322	368	346	346	193	197	173	173	212	222	156	158
EFE14SS-031	Inner	279	307	148	152	127	183	238	246	130	182	327	339	224	236	234	242	140	144	221	229	118	122	90	94	188	260	115	115	187	195	148	164	230	260	359	365	336	364	346	346	191	195	173	173	220	220	154	154
EFE14SS-032	Inner	303	319	128	152	143	163	238	238	182	186	0	0	244	244	234	238	140	144	213	217	122	124	0	0	168	188	107	107	181	181	140	146	230	260	359	359	336	360	346	360	191	193	173	173	212	222	154	156
EFE14SS-033	Inner	259	275	152	152	131	143	238	246	170	178	339	379	224	236	234	250	140	140	213	235	116	122	90	90	176	200	115	115	181	187	142	146	260	260	359	363	326	356	346	346	195	197	173	173	222	226	160	160
EFE14SS-034	Inner	267	275	132	152	123	127	238	266	182	198	319	335	224	236	222	226	144	144	225	233	118	122	0	0	0	0	115	121	181	193	142	146	210	260	359	363	332	352	346	346	193	197	175	175	222	222	156	156
EFE14SS-035	Inner	279	299	124	148	143	143	238	290	130	150	339	347	224	244	242	250	140	144	213	229	118	122	0	0	184	192	103	115	187	191	140	146	260	280	359	359	356	368	346	360	193	197	173	173	210	220	156	160
EFE14SS-036	Inner	299	307	124	148	163	167	250	262	202	206	0	0	224	228	230	250	140	144	203	229	118	124	0	0	188	196	115	121	187	195	134	146	230	360	363	365	356	364	346	346	191	197	173	173	220	222	154	158
EFE14SS-037	Inner	255	283	124	152	167	183	242	258	174	190	327	363	224	232	234	250	140	140	213	229	118	120	90	90	168	196	115	121	195	195	140	140	230	280	363	363	324	340	346	346	197	197	173	173	222	222	154	158
EFE14SS-038	Inner	279	323	124	152	143	147	258	290	174	190	335	339	224	244	230	234	140	140	203	221	0	0	0	0	184	240	103	115	193	195	142	146	250	280	359	363	336	360	346	360	191	193	173	173	222	222	156	160
EFE14SS-039	Inner	299	323	148	152	127	143	238	254	142	190	335	339	224	224	226	242	140	140	209	229	118	120	90	98	184	184	115	115	187	195	118	148	260	360	359	365	356	356	346	346	191	195	173	173	210	222	156	162
EFE14SS-040	Inner	299	303	132	148	127	127	0	0	138	174	351	355	232	236	234	250	140	140	213	225	116	122	0	0	180	188	115	121	181	195	146	164	240	260	363	365	344	368	346	346	191	193	168	173	220	222	138	156
EFE14SS-041	Inner	287	287	124	124	147	175	230	238	158	186	335	347	224	224	202	254	140	140	213	237	120	126	0	0	176	184	115	115	197	217	0	0	230	230	359	359	320	340	346	348	191	197	173	175	222	226	156	172
EFE14SS-042	Inner	307	323	152	164	143	187	238	258	154	186	331	355	224	244	234	242	140	140	221	229	112	122	98	102	184	256	115	121	181	197	134	142	260	280	363	367	322	332	346	352	197	201	173	173	220	226	154	156
EFE14SS-043	Inner	279	299	124	132	163	187	238	250	178	182	339	363	216	232	202	214	140	144	213	221	116	118	90	94	176	244	115	115	181	187	118	134	210	230	359	359	332	380	346	346	193	193	173	173	220	222	154	156
EFE14SS-045	Inner	295	299	128	148	147	147	258	266	170	218	343	343	224	249	222	254	140	140	225	229	122	122	90	98	176	212	115	121	187	193	148	164	280	280	359	363	372	376	346	346	193	197	173	173	226	226	138	156
EFE14SS-046	Inner	295	299	124	124	171	187	238	254	178	206	323	363	216	244	226	234	140	144	221	221	116	120	0	0	0	0	103	115	187	187	118	134	230	280	359	363	356	368	346	360	191	191	173	173	216	220	156	170
EFE14SS-047	Inner	283	295	132	136	123	163	238	266	146	206	319	343	232	236	222	246	140	144	209	229	118	118	0	0	0	0	0	0	0	0	0	0	0	0	359	367	360	360	346	346	193	197	173	173	212	226	156	160
EFE14SS-048	Inner	275	299	148	148	127	163	238	266	198	206	335	343	224	224	226	238	140	144	217	229	116	122	0	0	0	0	0	0	0	0	0	0	0	0	359	359	364	364	346	346	191	193	173	173	210	222	160	166
EFE14SS-049	Inner	255	283	148	152	127	163	238	258	162	206	343	359	224	236	210	234	140	144	217	221	116	116	0	0	0	0	0	0	0	0	0	0	0	0	359	367	344	360	346	352	197	197	173	173	222	222	154	156
EFE14SS-050	Inner	275	291	132	132	131	183	238	258	166	190	295	339	224	252	234	246	140	140	235	251	118	118	0	0	0	0	0	0	0	0	0	0	0	0	359	363	344	356	346	346	197	197	173	173	220	222	154	172
EFE14SS-051	Inner	303	307	128	152	143	183	258	262	114	190	343	371	232	244	238	250	140	140	0	0	0	0	0	0	0	0	0	0	0	0	0	0	0	0	363	365	352	356	346	360	197	197	173	173	220	222	156	156
EFE14SS-052	Inner	323	335	124	148	143	143	246	266	142	162	319	323	224	236	230	250	140	140	217	233	116	122	0	0	168	180	115	115	197	197	140	146	260	260	359	363	340	364	346	360	189	191	173	173	220	222	154	156
EFE14SS-053	Inner	287	307	148	152	135	143	242	246	138	178	319	367	224	224	222	250	140	140	229	233	122	126	0	0	180	180	103	115	187	195	140	142	230	260	359	359	360	364	346	360	189	191	173	173	212	226	156	158
EFE14SS-054	Inner	319	323	140	152	131	143	246	262	142	202	319	339	224	224	238	238	140	140	213	229	116	120	86	90	192	200	107	121	187	187	140	146	260	290	363	367	332	352	346	352	191	197	173	173	220	220	156	158
EFE14SS-055	Inner	319	323	124	124	143	187	238	242	194	202	319	343	224	244	226	242	140	144	217	229	118	118	0	0	0	0	0	0	0	0	0	0	0	0	359	363	336	360	346	346	189	197	173	173	220	222	154	158
EFE14SS-056	Inner	275	287	132	148	127	143	238	262	134	174	323	351	224	232	214	238	140	140	213	229	118	118	0	0	0	0	0	0	0	0	0	0	0	0	359	359	320	372	346	346	197	201	173	175	212	220	154	156
EFE14SS-057	Inner	267	275	124	152	127	187	238	246	142	206	319	347	232	244	222	242	140	144	225	229	116	126	0	0	0	0	115	121	195	197	140	164	230	230	359	359	352	364	346	346	191	197	173	173	212	222	156	160
EFE14SS-058	Inner	275	291	132	148	127	131	242	266	114	190	331	383	224	244	222	250	140	140	235	251	118	118	86	102	0	0	103	115	187	195	146	164	230	360	359	363	332	368	346	346	197	197	173	173	220	222	154	172
EFE14SS-059	Inner	295	295	128	164	123	143	238	238	166	182	315	347	224	224	202	230	140	144	229	235	118	122	90	94	176	176	115	115	181	187	140	164	260	360	359	359	322	356	346	360	195	197	175	175	212	220	158	158
EFE14SS-060	Inner	311	323	132	152	131	187	246	250	142	174	319	323	224	236	238	242	140	140	217	229	118	120	0	0	0	0	115	115	181	181	140	146	230	260	359	367	356	360	346	352	191	197	173	173	216	222	154	154
EFE14SS-061	Inner	307	331	132	148	163	187	238	262	162	190	347	363	224	224	218	242	140	140	233	235	118	122	0	0	0	0	103	115	191	193	134	164	230	280	359	363	356	372	346	346	193	197	173	173	222	222	154	158
EFE14SS-062	Inner	291	299	128	152	127	163	246	262	142	170	303	335	224	244	226	246	140	144	213	213	118	122	90	90	0	0	115	115	191	191	142	146	260	290	359	359	326	348	346	346	195	197	173	175	212	222	154	154
EFE14SS-063	Inner	291	295	132	148	127	135	0	0	146	182	315	319	224	224	238	242	144	144	213	221	118	118	0	0	0	0	115	123	195	195	148	160	230	260	359	363	352	356	346	346	197	201	173	173	220	222	156	158
EFE14SS-064	Inner	303	303	152	152	127	127	238	238	134	142	319	335	224	244	242	250	140	140	229	229	118	122	0	0	0	0	115	115	195	195	118	164	230	260	359	359	356	364	346	346	195	197	173	173	210	220	154	156
EFE14SS-065	Inner	275	307	124	148	123	127	238	262	110	134	347	371	224	224	230	238	144	144	217	217	120	122	0	0	0	0	103	121	187	195	146	164	260	260	363	367	352	364	346	346	191	197	173	173	222	226	156	158
EFE14SS-066	Inner	275	307	152	152	127	163	242	246	142	198	303	335	224	244	226	242	140	140	213	225	120	122	0	0	0	0	0	0	0	0	0	0	0	0	359	359	356	360	346	346	197	197	173	175	222	222	154	158
EFE14SS-067	Inner	279	291	124	148	127	163	0	0	182	202	315	339	224	224	238	254	140	140	225	229	112	118	90	102	184	188	103	115	181	193	140	146	230	360	359	365	356	368	346	346	191	197	173	173	220	222	138	156
EFE14SS-068	Inner	299	307	128	152	127	163	238	270	142	198	339	343	224	244	242	250	140	140	213	217	116	120	0	0	164	164	115	123	187	191	134	142	260	260	359	363	332	356	346	346	197	197	175	175	222	222	158	160
EFE14SS-069	Inner	275	279	124	148	143	171	242	246	130	150	335	335	224	224	238	250	140	144	221	229	118	118	0	0	168	168	115	115	189	195	118	140	280	290	359	363	336	336	346	360	191	191	173	173	220	222	154	154
EFE14SS-070	Inner	279	299	152	152	163	171	242	246	170	178	339	359	224	244	226	234	140	140	213	233	116	118	90	90	164	184	115	121	187	217	134	142	210	360	359	363	356	360	346	346	195	197	173	173	212	222	158	160
EFE14SS-071	Inner	275	275	124	152	163	171	238	246	142	166	339	359	224	224	250	250	140	140	213	229	116	116	0	0	164	240	103	115	187	187	164	164	260	260	359	359	356	360	346	346	195	197	173	175	222	226	156	160
EFE14SS-072	Inner	299	323	152	152	143	143	242	246	134	190	347	347	224	224	226	234	140	140	209	225	120	122	90	94	168	176	115	115	187	195	118	134	260	260	359	365	356	356	346	346	191	195	173	173	210	222	154	156
EFE14SS-073	Inner	267	283	124	148	163	167	238	262	162	206	319	335	216	228	230	250	140	144	203	229	118	124	0	0	220	244	115	115	187	195	142	142	210	260	363	367	364	368	346	346	191	193	173	173	220	222	154	158
EFE14SS-074	Inner	275	299	148	152	127	127	238	246	134	190	347	347	224	244	226	234	140	140	217	225	118	122	90	98	176	184	115	115	181	195	118	134	260	360	359	365	322	356	346	346	191	195	173	173	210	222	154	156
EFE14SS-075	Inner	299	335	136	152	127	131	230	238	162	170	335	339	224	236	226	250	140	140	213	229	116	118	90	90	176	200	107	123	191	217	142	144	210	250	359	359	340	348	346	346	195	197	173	175	210	222	156	160
EFE14SS-077	Inner	263	275	132	152	131	183	238	266	110	142	319	319	244	248	206	226	140	144	209	229	120	122	90	90	168	192	115	115	187	193	140	142	210	230	363	365	332	352	346	346	193	197	175	175	210	220	154	154
EFE14SS-078	Inner	275	275	148	164	123	143	238	258	110	122	347	359	224	244	222	242	140	144	225	229	118	122	0	0	168	176	107	121	181	195	146	148	260	260	363	367	322	356	346	346	195	197	173	173	220	220	156	156
EFE14SS-079	Inner	315	315	124	132	127	147	242	242	154	170	331	331	224	236	234	254	140	140	221	225	118	118	0	0	180	188	115	121	181	195	142	142	230	280	363	363	356	368	346	360	191	193	173	173	220	222	154	172
EFE14SS-080	Inner	279	299	152	152	163	171	238	238	142	178	303	355	224	244	234	250	140	140	213	233	116	118	90	90	164	184	121	123	191	217	134	164	260	360	359	363	348	360	346	346	195	197	173	175	212	222	158	160
EFE14SS-081	Inner	279	311	128	152	127	143	242	242	150	182	343	347	224	244	210	234	140	144	217	225	120	122	0	0	168	196	0	0	0	0	134	164	250	360	359	363	360	360	346	352	197	197	173	173	222	222	158	158
EFE14SS-082	Inner	279	283	128	136	159	175	242	250	150	198	323	359	224	224	230	238	140	140	217	229	118	118	90	90	184	196	115	121	181	181	142	164	230	290	359	363	356	372	346	346	191	197	173	175	212	222	156	160
EFE14SS-083	Inner	295	323	132	148	123	131	238	290	130	146	279	319	224	232	222	238	140	144	219	229	118	118	0	0	240	248	115	121	181	187	134	142	260	280	359	367	344	352	346	346	197	197	173	173	226	226	160	172
EFE14SS-084	Inner	275	299	148	152	131	147	238	266	150	178	343	351	224	224	230	254	140	144	221	225	122	122	86	90	172	208	115	121	187	191	164	164	230	260	359	363	322	376	346	346	191	197	173	173	212	226	156	156
EFE14SS-085	Inner	275	315	124	164	127	163	242	250	142	182	307	311	236	244	210	238	144	144	213	229	120	120	102	102	196	196	103	121	187	195	134	140	250	260	359	365	352	356	346	346	195	197	173	173	220	220	154	154
EFE14SS-086	Inner	287	323	132	152	147	171	238	290	170	178	339	351	236	236	222	254	140	144	229	229	120	124	102	126	184	192	115	115	187	187	146	146	230	230	363	363	326	352	346	352	191	201	173	175	222	226	154	154
EFE14SS-087	Inner	275	299	124	128	171	179	238	246	142	142	307	331	224	236	206	230	140	144	213	229	120	122	90	102	168	196	115	115	181	187	146	146	230	230	359	367	324	336	346	346	193	193	173	173	210	222	160	172
EFE14SS-088	Inner	275	295	124	136	127	175	238	238	194	198	351	359	224	232	234	238	140	140	213	217	118	120	86	86	196	196	115	121	193	195	136	144	260	260	359	363	364	368	346	360	195	197	173	175	220	222	156	158
EFE14SS-089	Inner	291	299	128	164	127	187	242	254	182	190	307	335	224	244	210	242	144	144	213	213	120	120	90	94	168	196	103	115	187	193	140	142	250	350	363	363	356	372	346	346	197	197	173	173	222	226	154	156
EFE17SS-001	Inner	271	303	124	148	135	163	246	246	130	174	347	371	224	244	230	238	140	144	217	217	0	0	98	126	196	200	107	115	195	197	144	164	280	360	359	363	318	368	346	360	193	201	173	173	222	222	154	156
EFE17SS-002	Inner	263	303	132	148	127	143	0	0	142	166	355	363	224	244	206	242	140	140	217	237	120	120	90	90	172	192	103	103	181	193	140	146	230	260	359	365	356	360	360	360	191	197	173	173	210	220	154	158
EFE17SS-003	Inner	275	323	148	148	143	143	238	246	150	198	331	359	224	244	226	238	140	140	221	229	0	0	90	90	176	188	107	115	195	217	138	146	260	260	359	359	352	372	346	346	193	197	173	173	212	226	154	170
EFE17SS-004	Inner	279	319	124	144	127	143	230	238	142	174	335	339	244	248	234	246	140	144	221	235	118	122	90	90	184	240	115	115	181	187	134	146	280	280	363	365	356	368	346	360	191	193	173	173	218	222	158	168
EFE17SS-005	Inner	275	275	124	124	135	187	238	294	134	170	331	359	224	244	206	246	140	140	221	229	0	0	90	102	168	192	103	115	187	195	134	134	260	260	359	359	0	0	346	360	191	197	173	173	210	222	150	154
EFE17SS-006	Inner	259	295	136	148	155	183	246	262	166	190	319	391	224	232	238	242	140	144	217	229	118	120	94	94	184	192	115	115	191	195	134	164	240	260	363	363	320	364	346	352	191	191	173	179	210	212	154	156
EFE17SS-007	Inner	275	287	148	164	127	127	238	250	122	162	331	359	244	244	226	238	140	140	203	213	0	0	90	94	176	196	115	121	187	189	146	146	260	260	0	0	344	352	346	348	0	0	173	173	220	222	0	0
EFE17SS-008	Inner	279	299	132	148	155	171	242	246	114	174	327	339	224	244	246	246	140	140	217	217	0	0	90	98	184	208	115	115	197	201	146	146	260	360	359	363	320	364	346	346	191	197	173	173	222	222	158	168
EFE17SS-009	Inner	295	327	124	152	143	187	238	238	130	142	323	375	224	248	230	234	144	144	221	235	0	0	90	110	168	172	115	115	187	187	140	140	230	360	359	363	356	360	346	360	193	193	173	173	220	222	156	170
EFE17SS-010	Inner	323	327	136	152	127	131	242	250	130	154	331	347	224	236	238	242	140	144	217	221	116	120	90	110	176	184	103	115	187	195	142	164	250	260	359	359	330	360	346	346	191	197	173	175	220	222	156	172
EFE17SS-011	Inner	275	335	124	164	163	163	238	258	162	170	339	375	224	232	218	234	144	144	229	229	0	0	90	90	200	200	107	121	181	191	118	146	260	260	363	367	332	364	346	346	191	197	173	173	222	226	156	160
EFE17SS-012	Inner	275	299	124	148	143	163	258	290	118	154	335	355	236	244	242	246	140	144	225	233	0	0	90	90	176	204	103	115	191	197	134	148	230	250	363	367	330	336	346	346	193	195	173	173	222	222	154	156
EFE17SS-013	Inner	263	295	144	152	155	179	242	246	114	198	339	347	244	248	230	254	140	144	213	217	0	0	90	90	184	200	115	115	187	197	140	146	260	260	359	363	360	364	346	360	191	197	173	173	222	222	156	156
EFE17SS-014	Inner	319	327	152	152	127	163	242	246	142	186	339	367	224	244	246	254	140	144	217	217	0	0	94	106	184	200	115	115	195	197	142	164	260	280	359	365	356	360	346	352	193	197	173	173	222	222	158	172
EFE17SS-015	Inner	275	307	136	164	123	127	238	238	158	198	323	367	224	236	238	246	144	144	217	221	120	120	86	126	176	196	107	121	187	195	140	144	230	260	359	363	0	0	0	0	195	197	0	0	0	0	156	156
EFE17SS-016	Inner	311	335	124	152	147	175	246	246	142	198	311	367	224	244	238	242	144	144	225	229	122	122	90	114	196	200	107	115	187	195	164	164	230	230	359	365	344	360	346	346	191	195	173	175	226	226	154	172
EFE17SS-017	Inner	279	339	124	152	167	187	250	258	130	178	319	351	224	236	234	246	140	140	213	217	116	124	90	106	188	204	115	115	187	195	134	140	210	210	363	363	332	360	346	346	197	197	173	175	210	220	154	156
EFE17SS-018	Inner	303	307	152	152	127	127	246	246	126	174	347	363	224	224	206	246	144	144	217	217	122	126	90	90	180	196	115	115	181	187	134	164	230	360	365	367	320	360	346	352	197	197	173	173	220	222	160	160
KI17SS-010	Inner	283	283	124	152	123	123	242	266	130	130	355	355	244	244	226	226	140	144	217	237	122	122	0	0	164	184	115	115	195	195	146	146	260	360	359	363	336	364	346	346	191	191	173	179	220	220	138	154
KI17SS-011	Inner	303	339	132	152	123	163	238	258	174	182	327	347	224	224	222	238	140	140	213	213	118	118	90	98	188	196	115	115	195	199	134	136	230	250	359	365	322	344	346	346	195	195	173	173	222	222	154	168
KI17SS-012	Inner	279	335	132	148	127	167	238	238	170	174	347	355	245	245	214	234	140	144	217	241	118	120	90	98	168	196	103	115	191	195	118	158	250	260	365	367	328	332	346	346	195	195	173	173	222	222	160	168
KI17SS-013	Inner	299	351	132	148	163	187	238	238	150	162	323	339	224	244	230	242	140	144	209	229	0	0	90	102	172	184	115	115	187	195	140	144	250	260	363	363	336	356	346	346	193	197	173	173	222	226	154	154
KI17SS-014	Inner	275	299	128	148	123	163	238	270	138	142	339	339	228	244	226	242	140	140	217	225	0	0	90	90	192	200	115	115	181	195	144	146	260	260	359	365	344	360	346	360	191	197	173	173	222	222	156	172
KI17SS-015	Inner	267	327	124	164	127	175	238	246	194	206	327	339	244	248	218	230	140	144	225	229	116	122	90	90	184	200	115	115	191	195	144	148	210	260	363	365	360	364	346	346	193	197	173	173	220	226	156	158
KI17SS-016	Inner	299	351	148	152	163	187	250	250	150	162	323	339	224	224	230	242	140	144	209	213	118	118	90	102	184	224	115	121	187	187	118	140	260	290	365	365	368	368	346	346	193	197	173	173	222	226	154	172
KI17SS-018	Inner	299	315	132	148	163	187	246	250	150	162	339	403	224	244	230	242	140	144	213	239	118	118	90	102	172	184	115	115	193	195	118	140	250	260	363	365	356	368	346	346	193	197	173	173	216	226	154	172
KI17SS-001	Inner	275	295	128	148	131	135	238	250	170	170	319	351	224	236	226	254	140	144	217	221	116	122	90	102	196	208	115	121	187	195	140	164	230	300	359	359	322	332	346	352	195	195	173	173	222	222	156	170
KI17SS-020	Inner	283	347	124	152	123	131	254	254	154	194	331	343	244	244	210	210	140	140	229	233	116	116	90	118	192	208	103	115	193	195	140	146	210	250	359	363	356	364	346	346	193	197	173	173	222	222	154	156
KI17SS-021	Inner	291	311	124	152	183	187	238	246	150	170	327	331	224	236	246	246	140	144	217	229	118	118	90	90	200	208	103	121	0	0	146	160	210	280	359	363	344	364	346	348	191	193	173	173	220	222	150	154
KI17SS-022	Inner	287	303	124	152	131	179	238	246	138	158	331	339	244	248	202	238	140	144	217	233	118	120	90	90	168	200	115	115	0	0	140	160	260	360	359	359	356	368	346	360	193	197	173	173	220	222	154	158
KI17SS-002	Inner	315	315	148	148	139	143	238	250	142	182	335	367	224	232	0	0	0	0	213	225	0	0	90	90	180	200	121	121	191	195	140	146	240	260	359	359	364	368	346	360	193	197	173	173	220	222	154	172
KI17SS-005	Inner	275	303	136	160	131	139	238	254	162	194	347	351	224	244	0	0	140	144	217	233	0	0	94	122	184	204	107	107	181	193	146	158	230	250	359	363	0	0	346	346	197	197	173	173	210	222	154	168
KI17SS-007	Inner	283	327	152	152	131	163	242	246	162	166	331	371	244	248	246	246	140	144	209	233	0	0	90	110	168	180	121	121	0	0	144	146	260	290	359	365	336	344	346	346	195	197	173	173	212	220	154	156
KI17SS-008	Inner	307	339	132	148	123	167	238	238	134	150	319	347	224	232	238	238	140	144	229	241	118	122	90	90	168	196	103	115	195	197	136	158	210	260	365	365	320	332	346	346	197	201	173	173	222	222	156	168
KI17SS-009	Inner	299	311	148	152	131	147	238	250	178	178	319	319	236	236	230	250	140	144	225	229	116	118	90	102	176	192	115	121	181	193	134	138	230	260	359	363	336	356	346	346	191	197	173	173	0	0	154	156
KI17SS-100	Inner	303	303	132	148	163	187	0	0	142	202	339	359	224	236	0	0	0	0	209	217	0	0	90	102	184	200	115	115	0	0	142	160	260	360	359	359	322	336	346	360	193	197	173	173	220	222	154	156
KI17SS-103	Inner	299	303	124	128	123	131	246	246	142	194	339	343	244	244	230	242	0	0	219	229	120	122	90	126	204	240	107	107	0	0	134	164	250	360	359	365	322	360	346	346	191	191	173	179	222	226	154	158
KI17SS-105	Inner	287	331	132	152	127	139	0	0	130	142	351	359	236	244	0	0	0	0	221	233	0	0	94	142	192	232	115	115	0	0	134	140	230	260	359	363	360	372	346	346	191	195	173	175	220	222	154	156
KI17SS-108	Inner	287	295	136	152	147	147	0	0	142	150	0	0	236	252	0	0	0	0	213	229	0	0	66	66	184	200	115	115	0	0	146	146	0	0	359	363	356	372	346	346	191	197	175	175	222	226	154	158
KI17SS-111	Inner	283	347	124	152	123	171	0	0	174	182	343	367	244	252	210	254	0	0	213	233	102	116	90	118	192	208	115	115	0	0	138	140	210	250	359	363	356	368	346	346	191	191	173	173	222	226	154	156
KI17SS-113	Inner	295	307	124	148	127	147	0	0	186	206	319	363	224	224	0	0	0	0	217	241	0	0	0	0	172	180	107	115	0	0	146	164	230	230	359	363	322	328	346	346	191	197	173	173	222	222	154	156
KI17SS-024	Inner	271	307	124	124	143	167	238	238	162	170	327	335	224	224	238	238	0	0	213	229	118	118	90	90	200	200	103	121	181	195	146	164	210	260	359	367	344	364	348	360	191	193	173	173	222	222	154	156
KI17SS-025	Inner	279	299	148	152	159	187	0	0	162	178	323	355	236	244	0	0	0	0	197	229	0	0	94	102	168	200	115	115	195	197	136	144	230	260	363	363	326	360	346	346	191	193	173	177	220	222	154	168
KI17SS-026	Inner	295	311	128	152	127	163	0	0	170	186	351	359	236	236	0	0	0	0	217	217	0	0	90	90	172	224	109	115	0	0	118	146	260	260	363	363	322	364	346	352	193	197	173	175	222	222	156	156
KI17SS-028	Inner	271	311	124	124	143	187	0	0	162	166	327	335	224	236	0	0	0	0	217	229	0	0	90	90	200	212	103	121	195	195	146	160	210	260	359	363	322	344	346	348	191	193	173	173	220	222	156	168
KI17SS-029	Inner	291	311	124	124	183	187	0	0	150	170	335	367	224	236	0	0	0	0	213	229	0	0	0	0	200	212	0	0	0	0	140	160	250	260	359	363	322	344	346	348	193	197	173	173	222	222	150	154
KI17SS-031	Inner	295	311	128	148	127	163	0	0	166	202	319	359	0	0	0	0	0	0	215	225	0	0	90	90	172	224	109	115	189	191	148	158	260	300	363	363	322	344	346	352	193	197	173	173	210	220	154	160
KI17SS-032	Inner	295	299	128	152	127	163	0	0	166	186	319	359	236	244	202	242	0	0	217	229	116	122	90	90	172	224	115	115	0	0	146	148	260	260	359	363	322	344	346	352	193	197	173	175	220	222	154	160
KI17SS-033	Inner	267	283	152	164	131	187	0	0	118	178	323	355	196	244	0	0	0	0	197	229	0	0	94	102	180	200	115	115	0	0	118	144	260	290	363	363	332	360	346	346	191	201	173	173	220	222	154	168
KI17SS-034	Inner	279	283	152	152	131	187	0	0	118	178	343	355	236	244	0	0	0	0	197	229	0	0	0	0	168	200	115	115	0	0	136	144	260	290	363	363	332	360	346	346	191	193	173	173	220	222	158	158
KI17SS-035	Inner	267	279	128	148	131	143	0	0	158	198	335	347	224	244	0	0	0	0	213	241	0	0	0	0	196	208	0	0	0	0	148	158	0	0	359	363	360	372	346	352	193	197	173	175	220	222	156	156
KI17SS-036	Inner	287	299	128	164	143	183	0	0	154	158	347	347	224	244	0	0	0	0	213	241	0	0	90	90	196	252	103	115	0	0	148	158	230	250	359	363	360	372	346	352	191	197	173	173	220	222	156	156
KI17SS-037	Inner	279	279	148	152	123	167	0	0	126	186	319	375	244	248	0	0	0	0	225	245	0	0	90	94	172	196	103	115	181	187	146	164	230	360	363	363	320	324	346	360	191	197	173	179	222	226	156	156
KI17SS-039	Inner	295	295	124	152	123	147	0	0	146	182	355	359	224	244	0	0	0	0	217	233	118	118	86	90	184	196	115	115	181	181	140	146	260	360	359	363	356	368	346	346	197	197	173	175	210	222	156	156
KI17SS-040	Inner	295	315	128	144	139	143	0	0	130	134	371	403	236	248	0	0	0	0	213	233	0	0	86	86	200	232	115	115	0	0	146	146	230	290	365	365	340	356	346	360	195	197	173	173	210	222	156	158
KI17SS-042	Inner	295	303	124	124	127	147	0	0	130	130	339	351	236	236	0	0	0	0	213	233	0	0	0	0	168	232	115	115	0	0	140	146	0	0	359	363	340	348	360	360	197	197	173	173	212	222	154	156
KI17SS-043	Inner	251	275	148	148	127	195	0	0	138	142	331	331	232	244	0	0	0	0	213	233	0	0	90	98	168	192	115	121	195	195	138	140	260	260	359	363	0	0	0	0	197	197	173	175	220	222	154	160
KI17SS-044	Inner	255	315	140	148	123	127	0	0	142	146	307	351	244	248	0	0	0	0	217	217	0	0	106	106	180	200	0	0	0	0	148	158	0	0	359	359	322	344	346	360	197	197	173	173	220	220	160	172
KI17SS-045	Inner	267	295	124	132	143	147	0	0	130	178	331	351	236	236	0	0	0	0	213	217	0	0	90	90	188	200	115	115	187	213	140	160	260	260	359	363	344	356	346	346	195	195	173	173	220	222	154	158
KI17SS-047	Inner	303	327	132	132	131	151	0	0	166	178	331	355	244	244	254	254	0	0	225	225	116	118	90	90	172	260	115	115	0	0	142	146	240	250	359	363	328	372	346	346	191	191	173	173	222	222	156	168
KI17SS-048	Inner	271	327	132	164	127	143	0	0	122	178	335	367	224	248	0	0	0	0	213	213	0	0	0	0	168	188	0	0	0	0	142	146	0	0	359	359	322	356	346	346	191	197	173	173	220	222	154	154
KI17SS-050	Inner	303	307	124	128	127	147	0	0	178	218	303	335	244	244	0	0	0	0	213	221	0	0	90	102	184	200	115	115	195	217	140	144	250	260	363	365	340	356	346	360	191	197	168	173	212	222	152	168
KI17SS-051	Inner	295	303	144	148	127	187	0	0	142	174	335	335	224	244	0	0	0	0	217	225	0	0	0	0	184	196	107	115	0	0	144	164	230	290	359	365	322	332	346	346	195	197	173	179	222	222	154	156
KI17SS-052	Inner	291	303	132	152	131	131	0	0	158	194	307	339	244	244	0	0	0	0	221	229	0	0	90	90	176	200	107	115	0	0	118	140	210	210	359	365	326	348	346	346	195	197	173	173	222	222	154	160
KI17SS-053	Inner	283	303	132	148	167	187	0	0	182	202	331	355	224	240	0	0	0	0	209	229	0	0	0	0	184	200	115	115	0	0	142	142	0	0	359	359	328	332	346	360	197	197	173	173	222	222	156	168
KI17SS-054	Inner	275	283	148	152	139	147	0	0	158	178	355	363	0	0	0	0	0	0	0	0	0	0	0	0	196	256	115	121	0	0	118	142	230	250	363	365	340	364	346	346	195	197	173	179	222	222	156	172
KI17SS-055	Inner	275	311	148	152	127	143	0	0	142	178	295	371	224	232	226	234	0	0	213	217	118	122	0	0	184	256	115	115	0	0	140	148	0	0	359	363	0	0	346	360	191	191	173	179	226	226	156	158
KI17SS-056	Inner	279	287	124	144	143	171	0	0	154	178	335	391	216	224	0	0	0	0	213	229	0	0	0	0	200	204	103	115	0	0	142	146	250	260	359	365	332	372	346	346	191	197	173	173	220	226	154	158
KI17SS-057	Inner	255	279	128	132	131	167	0	0	146	178	303	351	224	236	0	0	0	0	213	229	0	0	94	94	180	184	115	115	193	213	138	146	210	280	359	363	344	368	346	346	191	197	173	173	220	222	156	172
KI17SS-058	Inner	299	303	132	152	127	131	202	202	130	138	319	339	224	249	0	0	0	0	213	229	0	0	0	0	168	192	0	0	0	0	146	160	0	0	359	363	332	356	346	360	191	197	173	173	220	222	154	156
KI17SS-059	Inner	279	303	148	148	143	159	0	0	166	178	351	363	232	236	0	0	0	0	213	221	0	0	0	0	176	192	115	121	0	0	142	146	230	250	359	360	340	364	346	360	195	197	173	175	212	226	154	160
KI17SS-060	Inner	299	303	128	148	127	135	0	0	138	142	351	367	228	244	0	0	0	0	217	235	0	0	90	90	188	216	0	0	0	0	134	146	260	260	359	365	322	360	346	352	191	197	173	173	222	222	154	156
KI17SS-062	Inner	287	303	132	148	127	143	0	0	178	190	351	355	0	0	0	0	0	0	0	0	0	0	90	102	188	196	121	121	197	197	158	164	250	280	359	365	364	368	346	360	193	197	173	175	212	220	154	160
KI17SS-063	Inner	275	299	124	148	131	139	0	0	154	178	0	0	0	0	238	242	0	0	225	237	118	122	0	0	168	184	115	115	0	0	118	140	0	0	363	365	328	364	346	360	191	197	173	173	212	220	156	160
KI17SS-064	Inner	267	335	132	152	127	155	0	0	134	194	347	347	245	245	0	0	0	0	213	221	0	0	90	90	196	200	115	115	0	0	136	164	0	0	359	367	322	372	346	360	195	197	173	173	220	222	154	160
KI17SS-066	Inner	283	303	132	148	127	167	0	0	142	186	315	339	224	244	0	0	0	0	213	237	0	0	0	0	168	176	0	0	0	0	118	142	0	0	365	367	322	340	346	346	191	193	173	175	210	222	156	156
KI17SS-067	Inner	279	291	148	164	127	127	0	0	182	198	0	0	236	244	0	0	0	0	213	225	0	0	90	142	184	188	115	121	0	0	142	160	230	260	359	367	0	0	346	360	195	195	173	173	210	220	152	168
KI17SS-068	Inner	275	287	152	160	123	143	0	0	174	174	319	379	236	244	0	0	0	0	213	221	0	0	0	0	176	184	115	115	0	0	142	158	210	210	359	365	330	336	346	360	191	197	175	177	210	226	154	170
KI17SS-070	Inner	303	303	124	148	131	187	0	0	130	198	347	355	0	0	0	0	0	0	0	0	0	0	90	98	192	216	115	115	0	0	140	158	250	250	360	363	360	364	346	352	197	197	173	173	212	222	156	160
KI17SS-071	Inner	303	327	124	168	123	127	0	0	146	194	339	339	232	244	0	0	0	0	217	221	116	118	0	0	188	216	0	0	0	0	134	146	230	230	359	359	344	360	352	360	193	197	173	173	222	222	156	168
KI17SS-072	Inner	295	307	124	128	123	131	0	0	142	190	335	339	224	224	0	0	0	0	229	237	0	0	0	0	168	192	115	121	0	0	146	158	0	0	363	365	322	364	346	346	191	197	173	175	222	222	154	156
KI17SS-073	Inner	279	279	124	152	131	135	0	0	174	182	331	351	244	244	0	0	0	0	213	233	0	0	0	0	168	192	115	115	0	0	138	140	210	250	359	363	340	364	346	346	191	197	173	173	222	226	154	156
KI17SS-074	Inner	291	307	152	164	127	187	0	0	186	206	363	375	224	224	0	0	0	0	221	241	0	0	90	94	172	188	103	107	195	195	136	164	230	230	359	363	328	372	346	346	191	197	173	173	222	222	170	172
KI17SS-075	Inner	295	311	148	152	127	171	0	0	166	186	0	0	236	236	0	0	0	0	221	229	0	0	90	98	172	192	115	115	0	0	118	158	0	0	363	363	364	368	346	352	193	197	173	173	220	222	154	156
KI17SS-076	Inner	275	295	132	148	143	163	0	0	142	174	307	339	224	240	0	0	0	0	225	237	0	0	0	0	192	200	0	0	0	0	142	146	0	0	359	363	322	364	346	346	191	191	173	173	210	226	154	154
KI17SS-078	Inner	271	275	152	152	143	167	0	0	146	166	0	0	0	0	0	0	0	0	0	0	116	122	0	0	172	192	121	121	0	0	142	148	0	0	359	367	324	356	346	346	193	201	173	173	220	222	154	156
KI17SS-079	Inner	299	323	124	152	127	135	238	238	170	174	331	331	249	249	222	234	0	0	233	237	118	118	90	102	172	172	115	115	187	195	140	146	260	280	359	359	336	340	346	360	193	197	173	173	222	222	154	154
KI17SS-081	Inner	267	287	124	148	131	131	0	0	174	186	303	331	224	249	0	0	0	0	213	213	0	0	90	118	188	188	115	115	195	195	144	160	260	260	363	367	340	364	346	346	197	197	173	173	222	226	154	156
KI17SS-083	Inner	291	303	148	152	127	131	0	0	154	182	339	355	244	244	0	0	0	0	213	213	0	0	90	90	188	204	0	0	0	0	160	160	230	230	359	363	364	368	346	346	195	197	173	173	222	222	154	168
KI17SS-086	Inner	275	295	128	148	123	127	250	250	142	162	327	335	228	252	222	242	140	144	221	229	118	118	90	94	184	192	115	115	0	0	148	158	210	260	359	359	368	372	346	346	193	197	173	173	220	222	154	156
KI17SS-088	Inner	303	331	124	132	127	147	242	250	130	226	343	359	236	244	0	0	0	0	225	233	0	0	90	94	192	196	107	115	0	0	140	146	210	260	359	365	322	356	346	346	191	197	173	173	222	226	158	170
KI17SS-089	Inner	287	295	148	152	131	187	0	0	142	174	335	355	224	236	0	0	0	0	217	217	0	0	90	90	168	196	0	0	0	0	142	144	0	0	359	359	336	360	346	346	197	197	173	175	220	226	156	156
KI17SS-090	Inner	299	299	132	132	143	163	0	0	154	166	319	351	224	236	0	0	0	0	221	221	0	0	90	90	192	208	0	0	0	0	142	164	0	0	359	359	326	332	346	346	193	195	173	173	220	222	154	154
KI17SS-091	Inner	275	299	128	152	127	143	0	0	142	170	307	359	232	236	0	0	0	0	213	251	0	0	90	90	200	200	103	121	0	0	140	164	230	360	359	363	364	368	346	360	193	195	173	173	226	226	154	172
KI17SS-094	Inner	299	343	152	152	131	139	250	262	182	186	331	363	0	0	0	0	0	0	0	0	0	0	94	114	176	188	103	115	187	195	140	160	230	260	363	363	336	364	346	360	191	197	173	175	220	220	156	156
KI17SS-096	Inner	291	295	128	136	143	163	0	0	114	154	339	343	224	244	0	0	0	0	217	221	0	0	0	0	188	196	0	0	0	0	134	142	0	0	363	367	322	364	346	352	197	197	173	175	212	218	154	158
KI17SS-097	Inner	287	327	148	152	151	163	0	0	198	198	319	339	0	0	0	0	0	0	229	241	0	0	0	0	192	256	115	121	0	0	134	140	0	0	359	363	360	372	346	360	193	195	173	173	222	222	156	156
KI17SS-098	Inner	263	307	132	152	131	143	0	0	134	178	323	339	224	236	0	0	0	0	213	217	0	0	90	90	216	256	103	115	187	191	142	148	210	230	359	365	322	340	346	360	191	193	173	173	220	226	156	160
OP14SS-004	Inner	275	295	132	148	123	131	238	242	142	154	343	355	236	249	222	238	140	144	225	229	118	118	0	0	196	200	103	105	181	181	134	142	210	260	359	359	368	372	346	352	189	197	173	173	220	222	154	158
OP14SS-005	Inner	279	299	124	152	143	143	242	274	186	194	315	323	244	252	222	226	140	144	0	0	118	118	0	0	188	200	103	115	0	0	138	146	210	260	359	363	356	364	360	360	193	197	173	173	220	226	154	156
OP14SS-006	Inner	263	299	152	156	159	167	238	238	122	122	319	375	232	248	230	254	140	144	213	233	118	122	90	90	184	188	115	115	191	193	136	148	210	230	359	363	340	356	346	346	193	197	173	173	220	220	154	156
OP14SS-007	Inner	283	323	136	152	143	179	238	262	182	194	335	355	240	252	230	254	140	144	217	217	118	120	90	90	168	168	115	115	181	195	140	158	260	290	363	365	364	372	346	360	197	197	173	173	222	222	154	154
OP14SS-008	Inner	295	319	152	152	131	135	238	250	174	198	343	351	232	244	230	238	144	144	213	233	116	116	90	90	176	216	115	121	191	197	146	164	240	250	359	367	356	360	346	360	195	197	173	173	220	222	150	156
OP14SS-009	Inner	295	303	132	152	143	179	238	250	158	186	343	371	224	236	226	258	144	144	213	233	116	118	86	102	180	200	115	121	191	197	140	160	260	260	359	365	326	352	346	356	195	197	173	173	220	222	154	156
OP14SS-010	Inner	299	323	124	152	131	131	238	258	182	210	331	351	245	245	226	242	140	140	221	235	118	120	90	94	184	196	121	123	187	193	142	164	260	260	359	365	360	360	346	346	191	195	173	175	210	222	154	158
OP14SS-011	Inner	275	283	124	148	139	147	242	258	174	210	327	347	236	249	226	246	140	140	203	225	118	118	90	90	188	196	103	115	189	195	134	146	280	280	365	367	324	356	346	346	193	197	173	175	210	222	154	156
OP14SS-012	Inner	283	311	148	152	135	191	246	270	142	146	327	351	244	248	206	222	140	144	197	203	118	118	0	0	176	192	103	121	193	195	144	146	260	260	359	363	330	380	346	346	193	197	173	173	220	222	154	158
OP14SS-013	Inner	271	307	128	136	127	179	242	250	166	186	323	371	236	244	238	246	140	144	229	229	116	116	90	90	176	176	115	121	191	195	146	146	250	250	359	359	328	336	352	356	197	197	173	175	220	220	138	156
OP14SS-014	Inner	271	287	128	132	127	147	238	250	126	150	327	351	248	252	222	226	140	140	213	221	118	120	90	138	188	192	121	123	187	195	134	142	210	260	363	367	332	352	346	350	191	195	173	173	210	220	154	156
OP14SS-015	Inner	287	323	132	132	143	183	242	246	158	170	311	327	244	252	226	230	140	140	217	229	118	120	90	98	168	172	115	123	187	197	118	134	230	260	363	367	324	356	346	352	189	191	173	173	222	222	156	156
OP14SS-016	Inner	275	315	152	152	127	143	238	258	142	186	355	411	224	252	222	242	140	144	213	225	118	122	0	0	184	188	103	107	181	187	138	160	250	260	363	363	324	326	346	360	193	193	173	173	220	222	156	174
OP14SS-018	Inner	291	299	124	124	139	183	238	242	138	166	319	339	228	244	238	246	140	144	203	217	118	118	90	94	172	188	115	121	187	195	142	160	240	240	359	365	340	360	352	352	191	201	173	173	222	222	154	158
OP14SS-019	Inner	279	283	124	148	127	127	238	254	158	186	335	367	224	244	206	234	140	144	221	221	118	118	90	94	184	196	115	121	187	187	118	142	210	260	359	359	326	380	346	360	191	191	173	175	220	222	154	172
OP14SS-020	Inner	295	319	124	152	131	183	238	246	126	198	319	363	224	244	218	230	140	140	203	229	118	120	90	90	176	216	109	115	181	193	142	160	240	290	359	365	344	352	352	360	197	197	173	173	220	226	154	156
OP14SS-021	Inner	307	323	124	124	127	159	242	258	166	210	339	351	224	224	230	234	140	140	221	235	118	122	90	90	192	224	115	123	187	197	140	148	250	260	363	367	324	364	346	360	197	197	173	173	220	222	154	156
OP14SS-024	Inner	299	323	124	128	143	183	238	238	154	174	355	363	236	244	230	254	144	144	217	233	118	120	90	90	168	196	115	115	187	197	140	164	210	280	359	363	322	322	346	360	0	0	173	173	220	222	156	156
OP14SS-025	Inner	275	323	124	132	131	143	238	258	170	210	311	331	236	248	226	254	140	140	225	229	112	118	90	90	172	224	115	123	187	197	118	146	230	260	365	367	360	364	346	346	191	191	173	175	210	222	154	154
OP14SS-026	Inner	295	319	132	152	127	135	238	250	154	198	343	351	232	244	234	234	144	144	213	233	116	120	0	0	176	216	115	121	189	193	142	146	240	280	359	367	352	356	360	360	191	197	173	173	220	226	154	156
OP14SS-027	Inner	279	319	132	136	123	131	242	250	194	206	351	355	244	248	230	246	140	140	217	229	112	122	0	0	168	220	115	121	187	217	134	144	260	260	359	363	322	380	346	346	193	197	173	173	222	222	156	156
OP14SS-028	Inner	307	323	128	152	131	143	250	254	174	186	311	339	224	252	226	234	140	140	225	229	118	118	90	90	168	196	103	121	187	193	140	146	210	280	365	367	336	360	346	360	195	201	173	173	222	222	154	160
OP14SS-029	Inner	275	327	132	148	123	131	238	242	154	178	343	347	228	249	222	238	144	144	213	229	118	120	0	0	196	200	103	105	181	197	134	142	210	290	359	359	368	372	346	352	195	197	173	175	220	222	154	158
OP14SS-030	Inner	319	327	140	152	127	131	238	250	154	198	315	339	244	248	230	234	144	144	229	233	116	116	90	130	196	256	115	121	191	197	142	146	230	250	359	367	356	360	346	360	191	197	173	173	220	226	154	156
OP14SS-031	Inner	267	295	124	132	127	139	238	238	146	178	319	335	224	248	226	242	140	144	217	229	120	122	90	90	176	176	115	121	193	217	146	148	260	260	359	359	322	336	346	346	191	197	173	173	222	222	154	158
OP14SS-032	Inner	291	311	124	136	131	131	238	258	126	162	331	359	244	248	226	238	140	144	217	235	118	120	90	98	184	204	103	115	181	181	142	146	230	290	365	367	336	356	346	346	195	195	173	175	220	222	156	156
OP14SS-033	Inner	291	315	148	152	163	163	238	246	170	186	339	363	236	248	234	254	140	140	217	221	120	120	82	102	184	192	115	121	181	187	118	160	210	290	363	367	336	356	346	360	193	197	173	173	210	220	156	162
OP14SS-034	Inner	295	303	152	152	127	127	238	250	154	198	343	351	232	244	234	234	144	144	229	233	116	120	90	130	176	216	115	121	191	197	146	164	240	250	359	367	356	360	346	360	195	197	173	173	210	226	150	156
OP14SS-036	Inner	279	283	124	164	135	167	238	254	190	198	339	367	224	236	202	246	140	144	213	217	118	118	0	0	200	200	115	115	187	195	142	146	260	290	359	359	352	352	360	360	193	197	173	175	222	226	154	160
OP14SS-037	Inner	275	299	124	168	123	131	242	246	178	210	327	359	244	244	226	246	140	140	0	0	112	120	0	0	188	196	115	123	181	189	146	146	260	260	359	365	360	372	346	346	191	193	173	175	210	222	156	156
OP14SS-038	Inner	287	323	128	152	127	127	238	250	150	166	327	375	249	249	202	234	140	140	197	217	118	118	0	0	176	224	115	121	187	195	140	146	260	260	363	367	332	352	346	352	195	197	173	173	222	226	150	156
OP14SS-039	Inner	291	295	124	152	143	163	242	262	174	178	307	363	224	224	234	238	140	144	213	221	118	120	90	90	204	236	115	115	189	197	134	164	210	230	359	363	336	340	346	360	191	197	173	175	222	226	156	156
OP14SS-040	Inner	255	275	132	152	127	179	238	238	162	182	319	339	244	244	234	238	144	144	213	213	120	122	94	126	168	200	115	121	193	197	146	160	230	240	359	363	356	360	346	346	197	201	173	179	222	226	154	156
OP14SS-044	Inner	283	323	124	152	143	179	262	266	130	194	335	355	244	244	230	254	144	144	217	217	118	122	90	90	168	252	115	115	197	213	140	142	210	230	359	365	322	372	346	346	191	199	173	173	220	222	154	156
OP14SS-045	Inner	295	303	132	152	127	127	250	250	142	174	339	343	244	248	234	238	144	144	203	229	116	120	90	138	196	216	115	121	193	197	146	164	240	280	359	367	352	356	346	360	191	197	173	173	210	226	154	156
OP14SS-046	Inner	303	327	132	140	127	131	250	250	174	198	315	351	244	248	230	238	144	144	229	233	116	120	90	90	176	256	115	121	189	193	146	164	230	280	359	359	352	356	360	360	195	197	173	173	210	226	154	156
OP14SS-047	Inner	295	303	124	128	143	179	242	262	166	174	331	363	224	232	234	238	140	140	213	225	118	118	90	90	204	236	115	115	187	197	140	164	240	240	359	367	356	364	346	360	191	191	173	175	220	226	156	156
OP14SS-048	Inner	275	323	124	132	139	167	258	270	174	210	327	379	232	236	226	250	140	140	209	225	118	120	90	90	200	224	115	123	187	189	142	144	250	260	359	365	324	360	346	346	193	197	173	173	210	212	156	168
OP14SS-049	Inner	259	299	128	136	143	183	254	266	174	194	363	367	244	248	202	230	140	144	217	233	118	118	90	90	168	196	115	115	187	197	140	164	210	260	359	363	322	322	346	348	195	197	173	173	220	226	152	154
OP14SS-050	Inner	275	303	124	136	143	179	238	262	166	182	331	343	232	236	210	234	140	144	217	217	118	118	0	0	164	184	115	115	187	193	144	146	210	260	363	367	322	364	346	352	195	201	175	175	210	226	154	154
OP14SS-052	Inner	311	315	132	144	131	163	242	250	170	178	327	339	244	249	214	218	140	140	229	233	118	120	98	102	172	192	103	115	181	195	142	146	230	260	359	363	360	372	346	346	197	201	173	173	212	226	154	158
OP14SS-055	Inner	275	275	124	152	139	159	238	246	174	186	327	335	236	236	226	250	140	140	217	235	118	120	90	90	196	200	115	123	187	193	118	146	250	260	359	365	360	364	346	346	191	197	173	173	210	212	156	174
OP14SS-056	Inner	267	299	124	152	123	163	238	238	130	142	367	375	224	224	202	226	140	144	221	229	0	0	90	130	192	224	115	115	191	199	146	164	250	280	359	365	336	360	346	360	193	197	173	173	222	222	156	158
OP14SS-057	Inner	283	311	124	152	135	143	238	262	146	186	311	327	224	249	222	234	140	144	197	203	116	118	90	90	176	192	103	121	187	195	144	146	210	260	357	359	330	380	346	346	193	195	173	173	220	222	158	168
OP14SS-058	Inner	291	299	136	152	139	183	238	250	138	142	319	335	228	244	230	234	140	144	203	217	116	118	90	94	172	176	115	115	187	195	140	146	240	250	359	363	320	360	346	346	191	191	173	175	220	222	138	158
OP14SS-059	Inner	291	311	148	148	131	147	250	250	158	162	331	359	224	252	222	226	140	144	221	235	0	0	94	98	168	192	103	121	195	197	142	146	230	290	365	367	356	364	346	360	193	195	173	175	220	222	154	156
OP14SS-060	Inner	287	323	132	132	143	163	242	258	170	170	311	327	244	252	230	254	140	144	217	217	112	120	102	126	168	196	115	115	197	217	134	144	230	260	359	367	322	364	346	346	191	195	173	173	222	222	154	154
OP14SS-061	Inner	299	327	124	152	131	143	238	242	142	198	339	355	224	236	222	238	140	144	225	229	118	120	90	90	188	200	103	115	181	181	134	136	210	260	359	363	312	312	0	0	195	197	173	173	0	0	160	170
OP14SS-062	Inner	279	295	152	168	127	143	242	250	198	202	343	347	224	236	198	230	144	144	203	221	120	122	90	90	168	192	115	121	191	195	136	140	250	280	359	359	326	348	360	360	191	193	173	173	210	222	154	156
OP14SS-063	Inner	263	275	124	132	139	163	242	258	186	186	331	339	244	252	226	226	140	140	217	225	0	0	90	102	172	196	115	123	187	187	142	144	230	260	359	365	356	360	346	346	191	191	173	173	210	220	152	154
OP14SS-064	Inner	275	287	128	132	127	163	238	250	142	150	331	375	252	252	222	226	140	144	197	221	118	120	86	86	188	192	115	121	187	195	134	146	250	260	360	367	332	376	346	346	195	197	173	173	222	222	156	156
OP14SS-065	Inner	279	295	124	124	163	183	242	246	142	158	343	355	224	244	234	254	144	144	217	221	118	120	102	126	172	192	115	121	195	197	140	164	260	360	363	365	360	372	346	346	191	197	173	173	220	222	154	158
OP14SS-066	Inner	299	299	128	168	127	187	242	250	198	202	343	347	224	243	198	238	144	144	203	221	120	120	90	90	192	212	107	121	181	187	136	140	210	280	359	363	332	356	346	360	193	197	173	173	210	222	154	158
OP14SS-067	Inner	267	299	132	148	143	163	238	246	182	194	343	343	216	216	238	250	144	144	229	229	118	118	90	130	168	200	115	115	189	195	140	146	240	260	359	359	356	364	346	360	191	191	173	173	220	222	154	154
OP14SS-068	Inner	303	319	124	132	131	143	266	274	122	206	319	343	216	252	226	254	140	144	229	233	120	120	90	90	200	216	103	121	181	187	146	158	260	260	359	369	356	380	360	360	191	195	173	173	220	222	154	154
OP14SS-069	Inner	279	287	124	148	131	167	238	266	166	170	0	0	224	232	234	234	144	144	217	229	118	122	90	122	176	184	115	115	197	213	140	144	240	260	359	365	0	0	0	0	193	197	173	175	222	222	154	156
OP13SS-043	Inner	295	299	124	152	131	143	246	262	142	166	303	375	224	236	230	234	140	140	213	233	118	120	98	114	176	192	115	115	195	195	142	146	240	250	367	367	344	356	346	346	197	197	173	173	220	222	154	156
OP13SS-044	Inner	299	319	132	152	131	183	238	246	182	198	331	339	232	252	230	234	140	144	217	225	120	124	90	90	176	252	115	121	181	187	134	160	260	260	359	367	320	324	346	346	189	191	173	173	222	222	154	154
OP13SS-045	Inner	231	295	96	148	147	147	258	258	174	174	343	343	244	244	254	254	140	140	235	235	0	0	0	0	196	196	103	103	179	191	122	146	260	260	359	359	364	364	360	360	195	199	173	173	220	220	156	156
OP13SS-046	Inner	311	323	144	164	171	187	238	258	142	206	327	391	224	236	234	254	140	140	229	237	116	118	90	122	196	196	115	121	181	197	140	144	260	280	359	363	356	364	346	346	191	195	173	173	222	222	154	154
OP13SS-047	Inner	295	315	124	132	127	131	238	246	198	206	315	391	240	244	246	254	140	140	217	217	118	122	90	90	168	200	115	115	197	197	142	146	260	370	359	359	340	356	346	360	195	201	173	173	222	222	154	156
OP13SS-048	Inner	323	323	124	132	143	159	238	258	146	190	299	331	240	252	222	234	144	144	221	229	118	120	90	90	176	176	115	115	187	219	142	146	210	280	0	0	320	340	346	360	193	193	173	175	212	222	0	0
OP13SS-049	Inner	263	275	124	160	131	183	246	258	182	198	319	375	232	252	238	250	140	140	217	229	118	122	90	90	168	176	115	121	187	195	148	158	260	290	363	365	324	360	346	346	191	191	173	173	222	222	156	166
OP13SS-050	Inner	271	275	124	152	127	147	246	250	150	150	327	351	252	252	202	226	140	144	197	197	118	118	90	90	184	192	115	123	187	197	134	142	250	260	363	367	352	360	346	346	195	197	173	173	222	222	150	156
OP13SS-051	Inner	271	307	124	124	143	143	238	254	178	182	335	359	228	244	218	254	140	140	203	221	118	118	94	94	192	196	121	121	197	197	144	164	210	290	360	365	340	372	346	360	193	197	173	175	222	222	154	160
OP13SS-052	Inner	291	319	132	168	127	163	238	242	130	170	303	343	244	252	226	234	140	140	213	221	112	118	90	90	176	192	115	121	195	197	140	142	210	230	359	367	340	368	346	360	195	197	173	173	210	222	154	156
OP13SS-010	Inner	323	323	124	144	127	171	238	250	170	170	335	391	232	244	246	250	140	140	209	217	112	118	90	126	196	200	115	121	193	217	140	142	210	260	359	359	356	356	352	360	195	197	173	173	220	222	156	156
OP13SS-011	Inner	275	295	144	152	127	131	254	258	146	206	311	399	236	244	222	222	140	144	217	225	122	122	90	90	176	196	115	115	197	197	146	148	260	280	359	363	320	370	0	0	195	197	0	0	0	0	154	154
OP13SS-012	Inner	295	315	124	124	143	163	258	266	190	206	367	399	236	244	222	226	140	144	217	229	120	122	94	102	168	240	115	115	187	217	144	146	230	260	359	365	356	360	346	352	193	195	173	175	212	220	154	172
OP13SS-013	Inner	287	299	144	148	131	139	238	238	142	186	351	367	244	249	218	230	140	140	221	225	112	116	90	94	172	188	115	121	195	197	136	146	250	260	363	365	324	364	346	346	193	195	173	173	212	220	154	172
OP13SS-014	Inner	275	299	132	136	139	171	250	258	166	170	359	391	224	232	222	246	140	140	217	233	118	118	102	126	184	196	115	121	191	197	134	146	240	260	359	367	324	356	346	346	189	191	173	173	222	226	156	158
OP13SS-015	Inner	271	271	124	152	143	147	238	250	142	150	327	351	248	252	202	226	140	140	213	221	118	120	0	0	188	224	115	115	187	197	118	146	210	260	360	367	352	360	346	350	191	195	173	173	220	222	154	156
OP13SS-016	Inner	275	319	136	148	143	199	246	246	166	194	323	359	236	244	246	250	144	144	217	233	120	120	0	0	164	184	115	121	181	191	134	146	260	260	359	367	356	356	346	346	191	197	173	173	222	226	154	154
OP13SS-017	Inner	275	295	124	152	143	163	250	262	122	166	319	331	224	224	222	234	140	144	209	217	112	118	90	130	184	188	115	115	189	193	144	146	210	280	359	359	322	336	346	352	197	201	168	175	210	220	154	154
OP13SS-018	Inner	303	311	136	148	147	163	254	258	170	178	351	391	224	244	222	234	140	144	213	221	116	118	102	114	200	200	103	115	187	193	142	146	260	280	359	359	364	364	346	360	191	193	173	175	210	222	156	156
OP13SS-001	Inner	275	303	128	152	127	163	0	0	178	182	331	343	224	232	0	0	144	144	0	0	112	118	90	90	188	236	115	115	189	217	144	146	240	280	359	363	336	364	346	352	191	195	175	175	210	220	154	154
OP13SS-020	Inner	287	323	124	132	127	127	258	270	166	170	351	355	224	244	234	242	140	144	209	217	120	122	90	90	172	188	115	115	197	217	140	160	260	260	359	365	344	352	346	360	191	191	173	175	212	220	154	154
OP13SS-021	Inner	291	295	168	168	127	127	238	246	130	198	303	347	236	236	230	234	140	140	213	235	118	122	90	142	172	192	115	121	181	195	142	142	210	230	359	359	368	372	360	360	195	197	173	173	220	220	154	156
OP13SS-022	Inner	295	311	124	144	131	143	238	258	170	206	363	391	232	240	246	246	144	144	217	229	116	118	90	90	196	204	115	115	197	217	118	144	260	260	359	359	356	356	346	346	195	201	173	175	222	222	154	156
OP13SS-023	Inner	271	319	148	156	127	143	242	258	154	186	327	395	224	244	222	234	140	144	209	213	116	124	90	90	184	192	115	121	181	197	126	148	210	240	365	367	360	376	346	346	193	195	173	173	220	222	168	172
OP13SS-024	Inner	271	271	124	132	127	147	246	250	126	150	327	375	249	252	202	226	140	140	213	221	118	118	90	90	184	224	115	121	187	195	118	146	210	260	357	363	332	352	346	350	191	195	173	173	222	222	150	156
OP13SS-025	Inner	275	275	132	148	135	167	254	266	122	182	315	331	224	224	234	250	144	144	221	229	118	122	90	90	168	176	115	121	183	187	144	164	260	260	359	363	344	356	346	360	193	195	173	173	220	220	156	168
OP13SS-026	Inner	279	287	132	164	159	167	238	238	134	146	319	339	224	224	234	242	140	140	225	229	116	120	90	90	184	224	115	123	187	195	160	164	260	290	359	367	340	356	346	360	191	197	173	175	220	226	156	158
OP13SS-027	Inner	275	287	124	136	123	127	238	246	134	174	327	331	224	244	222	246	144	144	221	229	116	116	90	94	168	200	103	121	187	189	146	148	210	260	360	365	316	374	0	0	191	201	0	0	0	0	156	158
OP13SS-028	Inner	271	275	128	152	127	143	0	0	142	166	327	375	224	248	226	234	140	140	221	221	118	118	126	130	188	192	115	121	187	195	142	144	260	260	357	363	332	360	346	352	195	197	173	173	222	226	150	156
OP13SS-029	Inner	299	319	132	148	131	159	238	238	182	198	299	331	228	252	238	242	140	144	225	229	118	120	90	102	196	204	115	121	191	219	160	164	230	260	359	365	336	360	346	346	193	193	173	173	220	222	154	158
OP13SS-002	Inner	295	327	124	132	163	163	238	250	166	178	331	343	224	248	234	238	140	144	0	0	118	118	0	0	184	184	115	121	187	189	134	164	210	240	359	367	356	364	346	346	191	197	168	173	220	222	154	158
OP13SS-030	Inner	295	295	124	124	127	183	250	258	130	166	303	331	224	252	230	246	140	140	235	241	122	122	90	90	184	192	115	121	195	197	142	164	210	230	359	367	332	360	348	360	197	197	173	175	220	222	154	156
OP13SS-031	Inner	283	295	124	132	123	143	242	250	150	174	327	347	236	244	218	230	140	140	203	229	118	120	90	90	188	192	103	115	181	193	134	146	260	280	359	363	318	372	346	360	193	193	173	173	212	222	156	158
OP13SS-032	Inner	263	299	128	136	131	135	250	258	174	190	323	355	244	249	250	254	140	140	229	233	118	120	90	98	168	188	121	121	187	217	132	140	260	290	359	359	320	368	346	346	191	193	173	173	220	220	158	158
OP13SS-033	Inner	319	327	124	128	143	163	238	246	166	174	315	351	224	236	246	254	140	144	221	229	118	122	90	126	188	192	115	121	181	181	160	164	260	290	360	363	340	344	346	346	191	197	173	173	220	222	156	160
OP13SS-034	Inner	271	283	124	148	123	135	238	242	118	186	319	351	224	224	206	254	140	144	213	217	116	122	90	90	184	216	115	115	197	217	148	148	210	360	363	367	322	336	346	352	197	197	173	173	222	222	154	170
OP13SS-035	Inner	291	299	132	168	127	183	246	250	130	166	359	383	232	252	206	230	140	140	235	241	118	118	90	90	184	192	103	121	195	197	142	146	230	360	359	367	324	324	0	0	195	197	0	0	0	0	154	156
OP13SS-036	Inner	271	319	124	124	147	163	238	242	166	182	315	359	228	244	234	246	140	144	221	229	118	122	90	126	176	188	115	121	181	197	160	164	260	290	360	363	340	372	346	346	193	197	173	173	210	222	156	156
OP13SS-037	Inner	0	0	124	148	127	163	0	0	166	166	0	0	240	252	230	234	140	140	221	221	118	122	90	102	176	192	115	115	181	191	140	142	210	250	359	363	332	332	346	346	197	197	173	173	220	220	154	156
OP13SS-038	Inner	271	319	124	148	147	163	246	258	154	174	315	351	228	244	246	254	140	144	229	233	118	118	90	94	176	184	115	121	187	197	160	164	260	370	360	363	356	372	346	346	191	191	173	173	222	222	156	160
OP13SS-039	Inner	299	323	132	152	139	187	238	242	158	186	363	367	224	224	202	226	140	144	213	221	112	120	90	126	184	200	103	115	181	193	134	146	230	260	0	0	344	360	346	352	0	0	173	173	222	222	0	0
OP13SS-003	Inner	275	275	132	148	135	167	238	266	122	182	331	363	240	244	226	230	140	140	229	229	118	122	0	0	172	188	103	121	183	187	140	144	260	260	363	365	0	0	0	0	193	193	173	173	0	0	156	168
OP13SS-040	Inner	295	303	124	124	127	131	246	246	118	166	303	343	245	252	230	246	140	144	229	235	118	124	90	90	188	192	115	121	181	197	134	146	230	230	359	359	332	360	346	346	195	195	173	173	220	222	156	156
OP13SS-041	Inner	295	303	144	148	127	167	238	238	138	182	331	339	244	248	226	238	140	144	217	217	112	120	98	126	168	184	115	115	195	197	134	144	230	250	359	363	322	348	346	360	193	197	168	175	220	222	154	156
OP13SS-042	Inner	283	319	148	152	131	131	238	238	166	190	299	351	224	228	234	242	140	144	221	229	118	118	90	94	176	184	115	121	193	219	160	164	230	260	0	0	320	360	346	346	0	0	173	173	210	222	0	0
OP13SS-004	Inner	275	295	132	152	131	143	238	258	170	186	315	391	236	252	0	0	140	144	0	0	118	122	0	0	188	200	103	103	181	197	138	146	230	230	359	363	322	326	346	352	193	195	173	173	220	222	154	156
OP13SS-005	Inner	275	299	124	152	143	143	238	274	122	142	343	355	216	252	0	0	144	144	0	0	118	118	0	0	188	200	103	121	181	195	146	146	210	260	359	363	326	364	346	360	193	197	173	173	220	226	156	156
OP13SS-006	Inner	275	315	152	152	127	143	238	258	186	186	315	351	224	252	238	242	140	140	0	0	120	122	0	0	184	200	107	115	187	193	138	146	250	260	359	363	344	364	346	360	193	195	173	173	222	226	154	174
OP13SS-007	Inner	275	299	132	148	127	143	238	246	122	142	315	323	216	252	222	226	140	140	0	0	118	118	0	0	164	200	103	121	193	195	146	146	210	230	359	359	364	364	346	346	191	195	173	173	220	220	154	156
OP13SS-008	Inner	251	275	144	152	163	163	238	238	126	170	339	399	224	244	222	234	140	144	0	0	116	122	0	0	192	196	121	123	193	195	144	144	230	260	359	363	364	368	346	346	191	197	173	173	212	222	154	160
OP13SS-009	Inner	275	295	144	152	131	135	258	266	186	206	319	399	236	244	246	250	144	144	0	0	116	122	0	0	184	240	103	107	197	197	118	144	250	260	359	367	340	356	352	356	195	201	173	173	222	222	154	154
AN14SS-001	Middle	275	291	152	168	147	163	238	258	142	178	335	379	224	244	202	222	144	144	213	225	112	118	0	0	188	200	115	115	181	191	134	140	260	360	363	363	326	332	346	360	193	201	168	173	220	220	156	156
AN14SS-002	Middle	287	299	128	152	127	183	238	242	130	202	0	0	224	236	202	234	140	144	229	241	118	120	90	94	176	192	115	115	191	193	118	146	260	260	363	363	320	356	346	346	195	197	173	173	212	220	156	156
AN14SS-004	Middle	0	0	124	152	131	171	0	0	122	186	0	0	216	252	230	234	140	144	217	217	118	124	0	0	188	196	0	0	187	197	146	146	0	0	0	0	322	364	346	346	191	197	173	173	212	220	154	156
AN14SS-005	Middle	0	0	0	0	0	0	0	0	0	0	0	0	228	249	222	222	140	140	217	217	118	118	90	90	168	168	115	115	181	195	126	146	0	0	359	359	376	376	360	380	195	199	173	173	220	220	138	154
AN14SS-007	Middle	287	335	132	132	127	163	258	258	130	186	303	355	236	236	222	230	140	146	209	237	120	120	90	90	164	184	103	107	181	217	134	142	210	240	359	359	328	356	346	346	191	191	173	173	210	226	154	156
AN14SS-009	Middle	291	299	0	0	127	131	238	258	150	194	319	391	244	244	206	238	140	140	221	221	120	120	0	0	196	220	115	121	191	197	142	146	230	290	363	365	340	340	346	360	191	193	173	173	220	220	154	154
AN14SS-012	Middle	271	287	124	148	127	183	238	250	118	186	311	363	224	224	234	250	140	140	213	233	116	118	82	90	168	172	115	123	195	197	140	160	230	260	359	363	356	360	346	346	191	193	173	175	210	222	154	156
AN14SS-013	Middle	287	339	124	148	123	131	246	250	142	186	343	351	224	244	222	230	140	144	217	233	118	120	0	0	184	196	121	123	195	199	140	146	210	280	359	365	332	336	346	348	193	197	173	173	210	220	156	168
AN14SS-014	Middle	279	283	0	0	0	0	0	0	130	194	319	359	224	224	234	242	140	140	0	0	116	120	0	0	176	176	115	115	181	189	118	146	210	210	359	365	332	356	346	360	193	193	173	173	210	220	156	156
AN14SS-015	Middle	295	335	124	152	131	143	242	250	142	186	311	323	244	244	222	238	140	144	203	233	118	120	0	0	176	244	103	115	181	187	144	146	210	260	359	359	320	360	346	346	191	193	173	173	226	226	154	158
AN14SS-016	Middle	307	323	148	168	127	127	238	254	178	178	315	335	224	228	202	250	140	144	209	221	118	118	90	94	188	200	107	115	187	191	134	140	260	260	359	363	332	336	346	360	193	197	168	173	220	222	156	156
AN14SS-017	Middle	295	323	124	164	127	167	238	242	122	174	343	355	232	244	214	234	140	140	197	217	118	120	94	98	228	256	115	121	181	193	136	140	260	260	0	0	360	372	346	346	197	197	173	173	222	222	156	156
AN14SS-018	Middle	271	315	144	164	127	183	238	250	162	186	335	339	224	240	226	230	140	140	217	233	118	118	0	0	168	176	115	123	191	197	140	142	260	370	363	367	356	360	346	360	193	193	173	173	210	222	156	156
AN14SS-019	Middle	283	315	144	148	127	147	242	250	154	162	335	339	244	244	230	234	144	144	217	221	118	118	86	98	176	192	121	123	187	191	142	158	280	370	363	365	364	364	346	346	193	197	173	173	220	222	156	158
AN14SS-022	Middle	295	303	124	132	143	147	238	258	150	162	319	339	232	252	238	238	140	144	221	229	118	120	90	90	200	208	103	121	193	195	118	146	240	280	359	365	368	368	346	346	191	197	173	175	222	222	152	156
AN14SS-023	Middle	275	279	124	124	131	163	250	270	142	214	331	363	224	236	250	258	140	144	213	217	120	120	90	90	168	172	115	123	181	195	140	146	230	230	363	365	322	360	346	346	193	195	173	179	220	222	154	156
AN14SS-024	Middle	275	299	124	152	127	163	0	0	166	190	0	0	232	232	238	246	140	140	0	0	112	120	90	90	176	224	115	121	181	197	136	140	210	260	363	363	328	372	346	346	191	193	173	173	212	222	156	156
AN14SS-025	Middle	291	299	152	168	131	131	238	258	166	190	343	351	236	244	238	242	140	144	201	225	118	120	90	90	184	204	115	121	187	187	142	148	250	260	359	359	364	380	352	360	191	193	173	173	222	222	156	156
AN14SS-026	Middle	291	315	132	148	131	147	238	258	150	190	319	347	228	252	218	238	140	140	229	229	118	118	0	0	196	200	103	115	187	195	118	144	260	260	359	363	336	380	346	346	191	197	173	173	222	222	154	156
AN14SS-027	Middle	275	275	132	152	131	163	238	258	178	190	351	363	216	236	218	234	140	144	229	229	118	122	0	0	196	196	115	115	187	191	140	144	250	260	359	360	336	380	346	360	191	193	173	173	220	220	154	156
AN14SS-028	Middle	295	315	124	148	131	135	238	242	166	218	319	339	249	249	238	238	140	144	213	221	118	118	90	90	200	200	103	115	181	195	144	146	250	280	359	359	356	368	360	380	191	191	173	173	220	222	154	168
AN14SS-029	Middle	275	291	124	124	131	131	238	250	110	142	331	359	224	236	214	254	140	140	213	217	120	120	90	114	168	172	121	123	181	187	118	140	230	360	365	367	322	360	346	346	193	193	173	173	220	226	154	156
AN14SS-030	Middle	335	335	148	160	131	163	238	258	154	174	339	351	232	236	230	238	140	140	0	0	118	118	0	0	188	188	103	121	191	195	142	164	230	260	359	365	356	360	346	346	195	197	173	173	220	222	154	156
AN14SS-031	Middle	291	315	148	152	131	135	242	246	170	186	323	391	244	244	254	262	140	144	0	0	118	120	0	0	184	184	121	121	191	195	136	146	230	260	359	367	324	328	346	346	193	195	173	173	220	220	154	156
AN14SS-033	Middle	291	327	124	148	127	131	238	238	198	206	351	363	216	236	226	234	144	144	217	229	116	118	90	102	196	204	121	123	189	191	142	148	260	260	359	367	320	356	346	360	193	193	173	173	222	222	154	156
AN14SS-034	Middle	287	303	124	124	131	135	242	246	150	170	319	359	224	249	218	234	140	140	221	229	118	118	0	0	200	252	103	121	195	197	146	148	260	260	359	365	336	352	346	346	191	191	173	173	222	222	154	168
AN14SS-035	Middle	315	335	148	152	127	143	242	250	146	150	343	383	224	249	246	250	140	140	217	221	118	118	90	90	188	200	115	115	195	197	144	146	230	260	359	367	324	336	346	346	193	197	173	173	220	222	156	174
AN14SS-036	Middle	263	287	132	144	131	143	246	266	114	186	339	391	236	240	234	238	140	140	225	229	118	118	0	0	176	212	115	123	187	189	134	148	290	370	363	367	340	364	346	346	189	193	173	173	220	222	156	158
AN14SS-037	Middle	295	315	132	148	131	131	242	258	162	218	339	371	236	249	238	254	140	144	213	221	118	118	0	0	168	200	103	121	193	195	118	118	260	360	359	363	336	368	346	380	191	197	173	173	222	222	152	156
AN14SS-038	Middle	263	287	124	132	131	135	250	254	162	186	347	391	244	244	230	234	140	140	209	229	116	118	90	90	212	252	103	115	193	197	146	160	230	260	363	363	340	372	346	346	189	193	173	173	220	222	156	158
AN14SS-039	Middle	295	315	124	156	131	159	242	254	186	218	331	339	224	249	222	234	140	140	213	217	118	120	0	0	200	200	115	121	193	195	118	146	260	280	363	367	324	336	346	346	191	193	173	173	222	222	154	168
AN14SS-040	Middle	287	307	132	144	131	143	250	254	114	186	339	391	236	240	230	238	140	144	225	229	118	118	0	0	208	208	121	123	189	197	142	148	290	370	359	363	340	360	346	360	191	197	173	173	222	222	158	158
AN14SS-041	Middle	283	315	124	132	143	159	238	258	162	198	327	375	248	256	230	246	142	144	225	229	118	122	0	0	184	196	109	115	199	217	134	160	260	260	359	363	352	372	346	346	193	197	173	173	212	222	154	156
AN14SS-042	Middle	275	303	0	0	127	131	238	250	150	162	371	375	224	249	234	258	140	140	217	233	118	120	0	0	192	196	121	121	197	197	140	148	230	240	363	367	352	364	346	352	191	195	173	173	222	222	156	156
AN14SS-043	Middle	0	0	0	0	143	163	238	238	166	170	0	0	240	252	218	226	140	140	213	225	118	118	0	0	172	256	115	121	181	197	136	140	210	230	363	367	326	340	346	352	195	197	173	173	220	222	156	156
RS17SS-001	Middle	319	335	148	164	123	143	246	250	186	198	343	367	224	236	226	250	144	144	197	217	118	118	86	90	168	200	103	117	181	187	146	146	210	260	359	365	320	340	360	360	191	193	173	173	220	222	154	170
RS17SS-002	Middle	287	295	124	164	135	159	242	258	162	162	343	351	224	249	226	230	140	140	213	217	120	122	114	122	168	184	103	115	193	195	142	148	230	260	363	367	332	358	346	346	195	197	173	173	212	222	152	170
RS17SS-003	Middle	299	311	132	164	123	131	0	0	154	186	319	375	236	244	226	234	140	144	217	217	118	120	90	114	204	224	115	123	181	181	142	148	280	280	359	363	348	364	346	360	195	197	173	175	222	226	150	156
RS17SS-004	Middle	275	311	132	156	131	139	0	0	122	174	0	0	232	248	238	238	140	144	213	217	118	120	98	134	172	240	103	115	197	197	140	160	210	230	363	365	332	340	346	352	191	193	173	173	212	222	156	174
RS17SS-005	Middle	299	315	124	148	135	143	238	250	122	158	343	347	224	232	214	226	140	144	217	221	120	122	90	98	188	204	119	121	189	219	146	158	260	260	363	367	364	376	346	346	193	195	173	173	220	222	156	170
RS17SS-006	Middle	311	327	152	168	131	135	0	0	182	186	343	347	244	244	198	234	140	140	213	213	120	120	86	94	196	200	107	123	191	197	146	146	260	360	359	360	352	364	360	360	195	197	173	173	210	226	156	156
RS17SS-007	Middle	275	315	124	152	127	167	238	258	138	170	339	351	224	224	234	254	144	144	213	217	116	118	90	102	192	192	103	103	181	181	148	164	260	360	359	363	326	372	346	346	191	191	173	173	220	222	156	158
RS17SS-008	Middle	295	295	132	168	135	183	238	242	150	174	343	351	224	236	226	234	140	140	217	233	118	122	86	86	168	204	103	103	189	193	134	150	250	260	359	363	332	372	346	346	197	197	173	175	220	220	152	172
RS17SS-009	Middle	275	279	124	152	123	135	0	0	114	154	323	371	236	249	230	234	140	144	203	217	112	116	90	102	172	192	115	121	187	193	144	160	210	240	360	363	320	344	346	346	191	197	173	173	212	222	156	170
RS17SS-010	Middle	251	371	124	152	131	187	0	0	170	186	331	363	232	249	230	238	140	144	217	217	112	118	94	102	196	196	115	121	181	193	142	142	250	260	359	359	344	364	346	352	193	197	173	173	220	222	160	168
RS17SS-011	Middle	311	327	124	168	135	143	238	250	174	186	343	347	232	244	198	238	140	140	217	243	116	118	94	114	196	204	107	123	181	197	148	160	260	280	359	360	352	356	346	360	195	197	173	177	226	226	156	156
RS17SS-012	Middle	263	283	124	148	127	143	286	286	146	150	363	391	224	232	234	238	140	144	213	229	118	120	90	118	188	192	103	103	187	193	146	146	240	250	359	365	332	340	346	346	197	197	173	175	220	222	156	158
RS17SS-013	Middle	275	311	144	164	127	143	250	278	126	142	335	375	224	240	226	230	140	140	213	229	120	120	94	134	184	204	103	123	199	217	160	160	260	280	359	363	322	330	346	346	191	197	168	173	224	226	156	156
RS17SS-014	Middle	271	275	124	144	123	127	238	254	170	186	315	331	224	224	246	258	140	140	221	229	118	118	86	90	184	192	103	107	197	197	134	148	210	230	363	363	352	368	346	346	193	197	173	175	222	222	152	168
RS17SS-015	Middle	295	299	124	164	159	195	0	0	150	150	319	351	224	244	234	238	140	140	217	235	118	122	102	114	168	224	103	115	187	195	134	148	260	260	359	363	324	360	346	346	195	197	173	173	210	220	152	156
RS17SS-016	Middle	0	0	152	164	143	183	0	0	182	186	0	0	244	244	198	238	140	140	0	0	116	118	86	86	172	180	0	0	0	0	0	0	0	0	360	363	352	364	346	360	195	197	173	173	222	226	156	156
RS17SS-017	Middle	263	299	124	132	143	163	0	0	142	146	343	359	224	244	230	234	140	144	213	213	118	122	90	90	176	184	115	121	195	197	136	148	210	230	359	367	326	360	346	346	197	197	173	173	222	222	154	168
RS17SS-018	Middle	279	311	132	148	127	187	250	258	142	190	303	355	224	224	238	242	140	140	217	217	118	120	86	94	172	204	115	115	187	193	146	164	210	230	359	367	360	372	346	346	195	197	173	173	220	222	156	172
RS17SS-019	Middle	275	327	132	156	127	131	238	238	174	178	327	343	224	224	238	250	140	140	213	233	118	118	102	134	172	176	103	121	197	197	140	140	250	250	359	365	340	344	346	360	191	193	173	173	220	220	154	156
RS17SS-020	Middle	279	311	132	164	127	143	238	238	162	170	339	351	216	252	234	238	140	140	225	233	118	118	102	126	176	192	103	107	181	197	134	164	230	260	359	359	326	348	360	360	191	197	173	173	222	222	154	156
RS17SS-021	Middle	271	275	132	148	123	131	0	0	142	186	0	0	224	244	242	242	140	144	217	229	118	120	90	90	172	172	103	117	187	191	134	146	210	250	359	365	360	372	346	346	191	195	173	173	210	220	156	166
RS17SS-022	Middle	0	0	148	152	147	187	0	0	118	194	0	0	224	244	222	226	140	144	213	225	116	118	90	122	168	168	103	121	191	217	146	148	210	260	359	365	352	352	352	380	193	195	173	173	222	222	156	160
RS17SS-023	Middle	0	0	144	164	127	143	0	0	142	198	0	0	224	240	222	230	140	140	217	217	120	122	94	134	196	200	103	123	199	217	148	160	260	280	359	363	330	336	346	360	191	197	173	173	224	226	156	160
RS17SS-024	Middle	279	339	124	132	127	167	238	258	146	154	323	351	232	249	238	246	140	140	221	233	118	118	90	90	188	192	107	115	187	187	134	144	240	260	359	363	330	364	346	352	191	193	173	175	212	222	154	168
RS17SS-025	Middle	275	327	124	148	119	147	0	0	150	178	331	347	224	224	246	250	144	144	213	221	118	118	90	106	192	192	107	121	193	197	136	146	230	360	359	365	332	352	346	352	193	203	173	173	222	222	158	158
RS17SS-026	Middle	255	303	124	148	191	195	238	238	142	198	331	399	224	224	206	246	144	144	213	213	120	120	90	126	168	200	103	115	195	195	118	142	250	260	359	363	336	364	346	352	191	193	173	173	220	220	156	168
RS17SS-027	Middle	315	347	128	136	127	143	242	250	154	202	335	339	232	236	230	230	140	140	217	233	120	120	86	134	176	224	103	115	191	195	142	146	210	260	367	367	322	340	346	360	195	197	173	173	212	222	154	154
RS17SS-028	Middle	0	0	124	124	131	163	0	0	166	206	0	0	232	244	230	230	140	144	203	213	112	120	94	98	176	256	115	115	181	191	140	146	260	260	359	363	326	372	346	360	193	193	173	173	220	220	154	156
RS17SS-029	Middle	299	319	144	148	123	195	0	0	146	150	319	367	224	244	210	230	140	140	217	245	122	122	90	102	184	188	103	115	181	195	134	142	260	260	359	363	320	360	346	360	191	197	173	175	210	220	156	156
RS17SS-030	Middle	275	311	148	164	127	135	0	0	186	198	335	375	224	240	222	230	140	140	217	229	116	118	90	94	184	204	107	115	195	199	160	160	280	360	359	363	332	336	346	360	191	195	173	173	210	226	156	160
RS17SS-031	Middle	275	287	124	132	127	143	0	0	146	154	323	355	224	224	238	238	140	144	221	233	118	118	90	138	192	228	107	115	187	189	140	164	240	260	363	367	330	364	346	352	193	197	173	175	212	222	154	168
RS17SS-032	Middle	275	319	128	148	135	187	238	238	142	198	315	343	224	244	230	254	140	144	225	237	0	0	90	90	172	184	121	123	181	187	148	160	210	290	359	365	320	332	346	346	191	197	173	173	222	222	156	168
RS17SS-033	Middle	279	299	132	152	135	143	238	258	150	162	351	379	224	244	230	230	140	140	213	221	0	0	86	90	168	200	115	123	183	195	138	146	210	260	360	363	360	364	346	346	195	197	173	173	210	212	156	156
RS18SS-001	Middle	275	315	132	148	143	179	238	238	122	186	0	0	0	0	0	0	140	140	221	239	0	0	0	0	200	200	115	121	0	0	160	160	0	0	359	363	326	340	346	360	191	197	173	173	220	222	156	156
RS18SS-003	Middle	263	275	148	148	147	171	238	238	122	154	315	351	224	224	226	234	140	140	225	233	122	122	90	90	172	200	121	123	187	199	134	146	260	260	363	365	332	360	360	360	191	201	173	173	220	226	156	168
RS18SS-004	Middle	291	311	148	164	143	143	242	278	186	206	343	375	240	244	230	246	140	144	209	213	116	116	94	110	172	204	115	115	189	197	136	148	210	260	359	359	0	0	0	0	191	195	0	0	0	0	154	160
RS18SS-005	Middle	0	0	132	148	131	135	238	238	142	154	0	0	0	0	0	0	140	140	0	0	0	0	90	102	176	208	115	121	0	0	134	138	0	0	365	365	344	360	346	346	191	191	173	175	222	222	156	156
RS18SS-006	Middle	283	319	124	152	147	167	238	238	118	178	355	367	236	244	234	250	140	144	217	217	116	120	106	126	196	200	115	123	181	197	146	160	260	260	359	363	316	356	346	346	197	201	173	173	220	222	154	154
RS18SS-007	Middle	299	319	144	148	127	195	242	270	150	186	319	367	236	236	230	238	140	140	235	245	118	122	90	102	184	224	103	115	193	195	134	134	260	260	359	363	322	360	346	360	191	195	173	173	210	220	156	170
RS18SS-008	Middle	279	303	124	148	127	127	246	246	142	170	355	363	232	244	218	246	144	144	213	217	116	118	90	94	168	208	107	115	195	197	140	142	230	250	363	367	352	360	346	352	193	197	173	173	220	222	156	158
RS18SS-009	Middle	287	307	132	148	135	135	258	262	130	174	323	343	232	244	242	246	140	140	229	233	116	122	86	90	188	196	115	123	181	191	142	146	260	280	359	359	324	336	352	360	197	197	173	173	212	222	154	156
RS18SS-010	Middle	279	291	152	164	135	143	242	278	138	186	359	375	216	240	230	242	140	144	217	229	116	122	110	114	192	204	103	115	189	197	136	160	280	280	359	359	322	336	352	360	191	195	173	173	210	222	156	160
RS18SS-011	Middle	303	315	148	152	163	183	238	242	158	178	355	363	249	252	206	218	140	144	227	233	120	122	122	126	192	200	103	115	191	199	118	160	260	260	359	367	322	372	346	360	191	195	173	173	222	222	150	154
RS18SS-013	Middle	275	311	144	152	127	135	250	258	126	186	315	375	224	240	226	230	140	140	217	217	116	118	90	94	200	204	103	123	195	197	160	160	260	260	359	363	322	332	346	360	191	195	168	173	210	226	156	156
RS18SS-014	Middle	275	315	132	132	143	179	246	254	142	142	351	355	224	244	230	254	140	140	221	225	116	122	102	130	200	200	115	121	187	189	146	160	210	210	359	363	322	326	346	360	191	197	173	173	220	222	154	156
RS18SS-015	Middle	275	295	124	144	131	131	238	238	190	194	319	367	236	249	242	258	140	144	213	217	116	118	90	102	192	220	115	121	197	199	138	160	260	280	359	359	328	360	346	346	193	195	173	173	220	222	150	154
RS18SS-016	Middle	331	371	148	148	143	171	238	270	154	158	343	351	224	232	222	234	140	144	213	217	118	118	90	118	168	192	103	115	181	199	142	154	210	260	359	359	322	332	346	352	191	193	173	173	222	222	154	156
RS18SS-017	Middle	299	303	132	132	131	159	238	238	130	154	323	323	236	244	202	234	140	140	217	217	118	118	90	106	172	176	115	115	195	195	140	140	230	290	359	363	344	380	346	352	191	197	173	173	220	222	154	156
RS18SS-018	Middle	295	371	136	152	127	187	238	246	170	174	355	363	232	232	238	238	140	140	217	221	118	118	94	110	196	216	115	115	181	181	142	142	230	250	359	359	360	364	346	346	191	197	173	175	222	222	154	156
RS18SS-019	Middle	251	255	124	164	131	183	246	282	162	182	327	371	224	249	222	250	144	144	217	229	118	118	86	114	192	260	103	103	193	197	144	146	250	290	359	363	344	376	346	346	191	191	173	173	220	222	156	158
RS18SS-021	Middle	255	319	144	148	127	127	242	270	150	186	363	367	236	236	230	238	140	144	197	217	118	118	90	102	184	224	115	115	193	195	134	142	260	260	359	365	322	364	346	360	193	195	173	173	210	220	156	156
RS18SS-022	Middle	279	303	124	132	127	127	238	242	138	174	315	351	236	249	234	238	140	144	213	217	118	120	90	94	192	192	107	117	187	195	142	144	210	260	359	363	336	372	346	360	191	197	173	175	216	222	156	156
RS18SS-023	Middle	0	0	144	152	127	135	238	254	178	190	0	0	232	244	230	234	140	140	213	217	118	120	90	90	168	176	115	115	187	197	146	160	210	210	367	367	320	360	346	346	191	195	173	173	212	226	154	154
RS18SS-025	Middle	299	311	148	152	127	163	238	242	170	186	351	355	224	228	238	242	140	144	221	227	118	120	90	90	220	252	121	121	193	193	140	162	260	260	363	365	344	360	346	346	191	197	173	175	220	222	156	156
RS18SS-026	Middle	303	303	148	148	143	167	262	266	142	170	315	383	224	249	206	250	140	144	225	245	118	120	90	98	168	228	115	121	181	193	146	160	230	260	359	367	356	360	346	352	191	195	173	173	222	226	154	154
RS18SS-027	Middle	263	307	124	152	131	175	238	250	154	174	355	395	224	249	230	246	140	140	217	221	118	118	90	110	176	196	121	123	187	195	142	142	250	250	359	359	360	364	346	346	189	193	173	175	220	222	156	156
RS18SS-029	Middle	283	299	132	148	135	187	238	262	142	190	315	343	224	244	230	254	144	144	225	237	120	120	90	134	184	196	115	123	181	193	148	160	260	360	359	365	344	344	346	346	191	197	173	173	222	222	156	156
RS18SS-030	Middle	275	311	148	152	143	143	250	258	126	186	315	375	224	244	226	230	140	140	217	217	116	118	90	94	184	196	103	123	199	217	146	148	260	360	359	363	330	336	346	346	191	197	168	173	210	224	156	156
RS18SS-031	Middle	279	283	124	124	119	147	238	266	178	182	331	363	224	244	234	246	144	146	213	217	118	118	90	118	192	192	103	103	193	197	136	148	210	240	363	365	352	358	352	352	193	197	173	173	220	220	156	168
RS18SS-032	Middle	279	283	124	132	123	127	238	238	162	186	315	331	224	232	226	234	140	144	221	229	118	118	86	90	192	192	103	107	197	197	136	142	210	260	359	365	328	352	346	352	193	193	173	175	220	222	152	168
RS18SS-033	Middle	299	303	124	148	127	163	250	258	150	174	327	355	224	236	230	250	140	144	229	249	118	120	90	94	168	200	103	123	189	201	140	140	260	260	359	363	316	364	346	352	189	197	173	173	222	226	154	156
RS18SS-034	Middle	279	279	128	148	151	163	238	250	138	142	339	375	232	244	230	234	140	144	221	225	118	120	90	90	196	204	121	121	191	197	146	146	250	260	363	367	360	364	346	346	195	201	173	177	220	222	154	156
RS18SS-035	Middle	267	279	124	168	143	183	238	258	174	186	347	375	244	244	238	238	140	140	213	217	120	120	94	94	196	204	107	115	181	197	146	160	260	280	359	363	356	356	346	360	195	197	173	177	210	222	156	156
RS18SS-038	Middle	275	303	132	148	163	187	242	258	150	162	335	359	224	232	206	238	144	144	213	225	112	120	90	122	196	200	107	121	181	191	146	146	260	360	359	359	344	352	346	380	191	195	173	179	222	222	156	168
RS18SS-039	Middle	283	311	132	132	127	135	258	270	150	170	303	379	224	236	226	238	140	144	213	229	118	118	98	102	168	188	115	115	193	197	142	146	210	230	363	363	330	364	346	360	197	197	173	173	220	222	158	172
RS18SS-040	Middle	279	287	152	152	135	143	242	278	142	206	343	375	216	240	230	242	140	140	209	213	116	118	66	114	192	204	103	115	181	199	136	160	260	280	359	363	322	380	352	360	195	197	173	173	210	222	154	156
RS18SS-041	Middle	275	299	132	148	123	143	238	254	158	186	339	363	224	248	234	246	140	144	217	229	120	122	102	114	176	200	103	115	181	197	118	142	260	260	359	363	322	326	346	360	193	195	173	173	220	222	154	160
RS18SS-042	Middle	287	323	148	152	143	143	238	250	122	186	323	339	224	232	234	238	140	140	217	217	118	118	90	94	176	204	103	123	191	197	136	146	260	260	359	360	340	364	360	360	197	197	173	173	222	222	156	156
RS18SS-043	Middle	283	311	132	132	135	159	238	246	154	190	355	379	224	236	214	238	144	144	225	233	118	118	86	90	168	172	115	121	187	193	134	146	230	290	359	367	336	360	346	346	191	197	173	173	220	222	154	154
RS18SS-045	Middle	279	295	124	132	127	143	238	238	154	158	315	355	240	244	206	218	140	140	217	217	118	122	94	102	176	184	103	115	191	197	146	164	230	260	359	365	332	372	360	360	191	197	173	173	220	226	156	156
RS18SS-046	Middle	323	323	148	164	143	163	238	238	186	198	343	343	224	232	222	246	140	144	217	225	112	120	94	102	200	200	103	121	197	197	118	140	230	260	359	365	336	372	346	346	191	197	173	173	220	222	154	158
RS18SS-047	Middle	0	0	140	164	123	163	242	250	154	162	323	367	224	244	226	238	140	144	217	229	118	120	94	94	180	196	115	115	195	197	142	144	210	240	359	363	356	360	346	346	193	193	173	175	212	222	154	156
RS18SS-048	Middle	275	287	132	152	159	191	238	258	134	190	355	355	224	244	234	238	144	144	213	217	120	122	90	126	192	256	103	115	181	195	136	146	230	230	359	367	330	364	346	346	191	193	173	175	220	222	156	156
RS18SS-049	Middle	291	323	132	132	143	187	238	238	158	198	279	327	224	236	226	226	140	144	209	213	118	118	106	118	180	196	103	115	187	193	134	134	210	210	359	363	336	344	346	360	191	197	173	173	220	226	168	172
RS18SS-050	Middle	271	275	124	124	127	159	238	242	162	210	343	379	224	232	210	218	140	144	217	217	112	120	90	126	256	260	115	121	187	193	118	146	240	260	359	360	344	368	346	352	193	195	173	173	220	222	154	154
RS18SS-051	Middle	267	307	124	128	143	159	250	282	122	158	303	319	236	249	226	226	140	144	229	229	118	118	90	118	192	196	115	121	191	193	142	148	230	260	359	359	336	340	346	346	197	197	173	173	222	226	154	154
RS18SS-053	Middle	271	291	124	148	127	127	242	258	146	154	327	351	224	244	214	250	140	144	225	237	120	120	66	90	188	204	109	115	193	197	142	146	230	260	359	359	322	336	346	360	193	197	173	177	220	222	154	156
RS18SS-054	Middle	271	303	144	144	127	135	238	238	142	162	315	339	232	244	226	258	140	140	229	229	120	126	86	90	192	196	103	115	193	197	146	146	260	260	363	365	328	356	346	362	191	191	173	173	212	226	156	156
RS18SS-055	Middle	0	0	124	152	127	143	250	266	0	0	0	0	224	232	234	238	140	140	197	213	118	118	90	90	176	196	115	115	181	193	134	134	210	260	359	363	332	344	346	352	191	197	173	173	220	222	156	168
RS18SS-056	Middle	307	323	148	148	143	143	238	238	186	202	343	351	232	252	234	250	140	144	201	229	116	118	86	90	224	228	115	121	197	197	144	144	360	360	359	365	340	356	346	346	197	197	173	173	218	222	156	168
OM11SS-001	Middle	283	315	128	136	127	171	238	246	170	186	335	367	244	244	234	246	140	140	209	229	120	120	82	90	196	204	115	115	191	191	140	142	260	280	359	363	368	376	346	346	195	197	173	173	218	220	154	154
OM11SS-002	Middle	283	307	128	152	127	131	238	258	122	202	351	367	236	248	234	238	140	144	213	229	118	120	82	98	184	196	115	121	193	197	134	146	240	280	359	359	336	360	346	346	191	197	173	179	222	226	150	156
OM11SS-003	Middle	311	335	132	136	139	195	238	258	138	174	319	351	224	224	234	238	140	140	229	229	118	120	90	126	192	228	115	121	195	195	118	142	260	280	359	367	316	364	346	346	195	197	173	179	222	222	154	154
OM11SS-004	Middle	279	279	128	136	131	187	238	258	110	182	311	319	224	224	230	242	140	144	229	233	118	120	82	90	168	252	115	121	183	195	148	158	280	280	359	365	0	0	0	0	195	197	0	0	0	0	154	168
OM11SS-005	Middle	283	323	0	0	131	159	246	250	138	174	327	367	224	224	222	242	140	140	201	235	118	118	0	0	188	192	115	121	181	181	146	160	210	230	359	367	332	364	346	346	197	197	173	173	212	220	154	154
OM11SS-006	Middle	283	307	128	148	131	139	254	258	194	202	351	367	236	252	234	238	140	144	203	229	118	118	0	0	184	192	103	115	189	193	134	146	240	250	363	367	336	364	346	352	191	197	173	179	222	226	156	168
OM11SS-007	Middle	303	323	144	148	131	187	238	238	126	182	327	331	232	236	234	238	140	140	201	221	118	120	90	90	196	200	115	121	181	187	140	144	250	260	363	367	336	380	346	360	191	191	173	173	222	222	156	156
OM11SS-008	Middle	275	275	128	132	143	147	250	258	154	194	311	327	236	244	226	250	140	140	217	221	118	120	0	0	176	196	121	121	191	197	148	148	260	290	359	359	320	322	346	346	197	197	173	173	220	224	156	168
OM11SS-009	Middle	311	335	132	136	167	187	238	254	110	202	343	347	244	252	202	250	140	144	225	229	116	118	82	90	188	204	103	103	187	191	134	140	240	260	363	363	348	348	346	348	195	197	173	177	212	222	156	156
OM11SS-010	Middle	275	275	128	152	123	163	250	258	146	154	327	343	236	236	234	242	140	146	221	229	120	122	90	90	188	200	115	115	191	195	142	148	260	290	359	363	360	376	344	346	191	191	173	173	212	220	154	172
OM11SS-011	Middle	307	335	132	136	143	171	238	250	110	186	347	367	224	236	218	246	144	144	213	229	118	120	90	90	176	196	115	121	197	213	140	148	280	280	359	367	348	360	346	348	197	197	173	175	222	222	154	156
OM11SS-012	Middle	307	335	132	136	143	187	238	266	178	178	343	347	224	236	218	250	144	144	213	229	118	120	90	90	188	200	103	115	191	191	118	146	280	280	363	365	320	340	346	346	195	197	173	173	222	222	156	156
OM11SS-013	Middle	279	311	132	164	143	187	238	270	178	202	319	331	224	252	202	250	140	140	221	237	118	120	90	90	188	240	115	121	187	197	140	146	230	240	363	367	348	360	346	346	191	197	173	177	222	222	156	156
OM11SS-014	Middle	291	335	132	136	187	187	238	254	178	186	343	347	236	252	234	250	140	144	225	229	116	118	90	90	188	240	103	121	187	213	140	146	260	360	363	363	320	348	348	360	197	197	173	173	222	222	156	156
OM11SS-015	Middle	271	275	124	128	119	163	246	246	162	174	343	367	236	244	238	246	140	140	229	247	118	118	90	90	168	188	107	115	181	217	118	146	230	260	359	359	352	352	346	352	191	197	173	173	220	222	156	156
OM11SS-016	Middle	275	311	124	168	119	131	238	246	122	162	319	343	236	244	206	238	140	140	229	247	118	118	90	90	172	188	115	115	181	187	140	146	260	290	359	363	332	352	346	346	191	191	173	173	220	222	156	156
OM11SS-017	Middle	275	319	124	132	131	143	258	266	154	186	327	359	244	244	218	234	140	140	217	229	118	118	90	90	200	228	107	115	195	217	142	146	210	260	359	367	322	330	346	346	191	197	168	173	212	224	156	170
OM11SS-018	Middle	283	299	132	136	139	187	238	246	178	182	343	347	244	249	210	250	140	144	233	233	116	118	90	90	200	200	115	115	187	213	140	160	260	290	363	365	320	336	348	360	195	197	173	173	220	222	154	156
OM11SS-019	Middle	299	307	132	136	143	171	238	266	110	178	343	347	224	244	250	250	144	144	213	237	118	118	90	90	176	196	103	121	191	197	146	148	260	280	363	365	348	360	346	346	197	197	173	173	222	222	154	156
OM11SS-020	Middle	299	307	136	152	127	171	238	266	110	166	307	391	236	244	234	250	140	144	213	237	118	118	90	98	196	196	103	103	181	213	118	140	280	290	359	359	320	332	346	348	193	197	173	173	210	222	156	168
OM11SS-021	Middle	299	303	136	152	175	187	242	254	122	178	347	351	244	244	218	234	140	144	213	229	118	118	0	0	188	196	103	115	187	213	146	146	260	280	359	359	320	320	346	346	195	197	173	173	210	222	154	168
OM11SS-022	Middle	311	335	132	136	167	187	238	254	110	186	307	343	236	252	202	250	140	144	225	237	116	118	90	90	188	240	115	121	191	195	140	140	260	360	363	367	320	336	346	360	195	197	173	173	222	222	154	156
OM11SS-023	Middle	271	291	124	168	127	163	238	246	162	174	319	343	236	244	206	230	140	140	229	229	118	118	90	90	168	172	107	115	191	217	118	146	250	290	359	359	352	352	346	346	191	191	173	173	220	222	156	156
OM11SS-024	Middle	311	311	132	148	127	187	238	246	194	202	331	335	224	224	234	238	140	140	225	229	118	118	82	82	168	204	103	103	195	195	118	134	290	360	363	365	336	360	344	360	197	197	173	177	220	222	154	156
OM11SS-025	Middle	287	291	132	148	131	187	238	246	186	194	335	343	224	236	234	238	140	146	225	229	118	118	82	82	168	204	103	103	181	195	118	140	210	240	365	367	336	372	346	346	197	197	173	173	212	220	154	156
OM11SS-026	Middle	307	311	148	148	131	131	238	250	150	170	335	371	216	224	238	246	140	144	217	217	118	120	82	82	168	200	103	115	181	203	118	142	250	290	365	367	348	360	344	348	195	197	173	175	220	222	156	156
OM11SS-027	Middle	275	327	124	160	131	143	234	250	150	182	343	395	232	248	234	250	140	140	217	229	112	118	90	98	176	200	103	103	181	199	144	164	230	250	363	363	336	348	346	346	193	197	173	173	220	222	154	158
OM11SS-028	Middle	263	311	124	148	131	131	0	0	150	178	335	367	236	260	254	254	144	146	229	229	118	118	82	82	184	200	103	115	181	181	118	148	260	290	363	365	336	372	344	346	191	197	173	173	220	222	156	156
OM11SS-029	Middle	271	311	132	132	163	167	246	266	142	202	319	343	252	252	202	234	140	144	213	225	118	118	0	0	168	240	115	121	195	197	140	148	280	360	359	363	336	368	346	352	193	197	173	177	210	212	154	156
OM11SS-030	Middle	275	283	124	124	143	147	0	0	178	186	327	351	224	244	222	234	140	144	229	235	120	122	90	94	176	196	107	115	187	193	146	146	210	230	359	359	336	364	346	352	195	197	173	173	220	220	154	154
OM11SS-031	Middle	279	299	124	164	143	163	254	270	174	178	319	327	236	244	234	238	140	140	217	219	116	118	90	90	188	232	121	121	187	191	118	144	230	230	365	365	332	340	346	346	191	197	173	175	220	220	154	156
OM11SS-032	Middle	275	299	148	152	131	143	0	0	138	186	327	343	240	244	238	258	140	144	197	221	118	122	90	90	184	204	115	121	183	187	134	134	210	260	363	367	326	336	346	360	193	197	173	173	220	220	156	158
OM11SS-033	Middle	275	295	124	152	131	147	242	258	178	186	327	351	224	244	246	246	144	144	197	237	120	122	90	90	192	208	115	121	181	195	140	164	230	260	359	363	332	364	346	346	197	197	173	173	220	220	154	154
OM11SS-034	Middle	283	299	124	132	135	143	250	258	178	186	351	379	232	240	234	246	140	140	197	213	122	122	90	90	180	196	115	115	195	195	134	142	210	290	359	367	364	364	346	360	193	195	173	173	210	220	154	158
OM11SS-035	Middle	291	335	132	136	187	187	238	246	110	186	307	331	244	252	234	250	140	144	237	237	116	118	90	90	188	240	103	103	191	195	134	140	280	360	363	367	336	348	346	348	197	197	173	173	212	222	156	156
OM11SS-036	Middle	295	323	148	168	147	175	238	258	146	154	323	343	224	232	226	238	140	144	209	217	118	120	82	90	172	204	103	103	181	197	160	160	260	260	367	367	336	344	346	352	195	197	173	173	222	222	156	158
OM11SS-037	Middle	287	295	152	168	127	147	238	246	154	218	355	379	244	249	230	238	140	144	201	233	118	120	0	0	200	200	103	121	193	197	140	160	230	260	367	367	344	380	346	352	193	199	173	173	222	222	156	168
OM11SS-038	Middle	295	323	132	144	127	159	242	250	142	178	347	367	232	248	218	250	140	144	217	237	118	120	0	0	192	224	115	121	187	193	134	144	250	290	363	363	336	360	346	346	191	197	173	173	220	220	154	156
OM11SS-039	Middle	255	275	124	124	143	147	238	242	114	154	335	343	244	249	202	246	140	144	229	235	120	122	90	90	176	196	107	115	181	195	142	146	210	260	363	367	326	364	352	360	193	193	173	173	220	222	154	156
OM11SS-040	Middle	255	275	124	152	127	135	242	250	114	186	343	351	244	249	202	222	140	144	197	213	120	122	94	94	176	196	107	115	181	195	142	146	210	260	363	367	326	364	346	360	193	195	173	173	210	222	154	154
OM11SS-041	Middle	283	315	124	148	143	143	238	258	114	186	327	335	232	240	234	246	140	144	213	233	118	122	90	94	168	180	115	115	195	195	136	142	210	260	359	367	326	364	346	352	193	195	173	173	220	220	158	160
OM11SS-042	Middle	287	303	132	132	131	143	258	262	114	154	343	399	232	249	234	238	140	144	217	221	118	120	90	90	196	204	115	121	183	197	140	144	210	280	365	367	324	376	346	346	193	197	173	173	220	222	156	156
OM11SS-043	Middle	323	323	124	132	127	147	258	270	154	166	343	391	224	232	230	238	140	144	201	213	118	118	90	90	200	228	115	121	193	197	118	144	210	240	359	363	336	376	346	352	193	197	173	173	222	226	154	156
OM11SS-045	Middle	263	283	128	148	131	139	238	246	114	114	315	331	224	252	230	262	144	144	213	217	118	120	90	90	188	240	121	121	193	197	134	158	260	260	363	363	340	356	346	346	193	195	173	175	222	226	152	156
OM11SS-046	Middle	299	311	124	132	131	175	238	238	122	182	319	323	232	236	226	254	140	144	213	225	120	120	0	0	172	176	103	115	181	197	140	144	230	260	359	359	336	380	346	346	193	197	173	173	210	222	154	158
OM11SS-047	Middle	287	295	132	148	147	175	238	246	122	154	335	343	232	236	226	238	140	144	201	213	118	120	90	90	196	200	103	117	187	197	144	160	210	260	359	367	364	376	346	346	193	195	173	173	220	222	156	158
OM11SS-048	Middle	295	311	132	148	131	175	238	238	122	162	323	327	224	236	226	254	140	140	201	213	120	120	0	0	172	176	103	115	187	187	140	144	250	260	367	367	364	364	346	346	191	195	173	173	210	222	154	158
OM11SS-049	Middle	299	323	124	152	131	163	246	254	138	142	327	343	224	224	222	230	140	144	213	219	118	118	0	0	192	192	115	115	191	197	146	164	230	230	359	359	320	326	346	360	195	197	173	173	220	220	154	156
OM11SS-050	Middle	283	299	152	164	127	135	242	246	166	194	335	367	232	244	226	242	140	140	213	243	118	118	0	0	208	252	103	123	187	191	140	142	250	260	363	365	336	336	346	360	191	193	173	173	222	226	156	172
OM11SS-051	Middle	283	307	132	148	131	139	238	258	138	194	319	351	236	252	234	238	140	140	213	229	118	120	0	0	168	192	103	115	193	197	134	146	240	250	363	367	316	360	346	352	197	197	173	173	222	226	156	168
OM11SS-052	Middle	291	295	148	168	131	167	242	258	154	186	331	355	224	224	202	234	140	140	225	233	118	120	82	90	172	172	115	123	195	217	140	142	230	240	359	367	0	0	346	346	191	197	173	175	220	222	156	168
OM11SS-053	Middle	275	307	128	132	131	143	250	258	122	178	319	343	224	224	234	246	140	144	213	233	120	120	90	90	188	200	115	121	183	197	118	142	280	280	359	367	326	360	346	346	191	193	173	175	220	222	156	156
OM11SS-054	Middle	315	315	128	136	131	187	238	246	170	186	307	391	244	244	250	250	140	140	209	229	118	120	0	0	204	252	115	115	181	195	140	144	260	280	359	363	364	364	346	346	195	197	168	173	220	222	154	154
OM11SS-055	Middle	283	311	128	132	139	187	238	258	138	186	343	351	224	224	234	238	140	140	229	239	116	118	90	90	196	240	103	121	195	195	134	140	240	240	359	367	316	336	346	346	197	197	173	179	212	226	156	156
OM11SS-056	Middle	311	311	128	132	139	167	238	258	138	202	331	351	236	252	234	234	140	140	229	239	118	120	90	90	196	240	103	121	193	195	118	140	240	360	363	367	336	336	346	346	197	197	173	177	222	222	154	156
2012-Omvik13	Middle	299	323	128	132	131	143	238	254	178	206	319	343	232	240	222	226	140	140	209	227	0	0	0	0	0	0	0	0	0	0	144	160	230	230	359	359	332	352	346	346	189	191	173	173	220	220	158	168
2012-Omvik14	Middle	275	351	148	148	127	143	246	266	190	214	343	359	224	232	238	258	144	144	217	233	118	118	0	0	0	0	0	0	187	187	142	142	0	0	359	361	336	364	346	360	195	197	173	175	220	220	156	156
2012-Omvik15	Middle	279	295	132	152	127	135	246	250	150	194	351	363	224	232	246	254	140	140	229	233	118	118	110	110	196	208	121	121	187	217	134	148	260	290	359	363	322	356	346	360	191	197	173	175	220	220	154	156
2012-Omvik16	Middle	299	307	124	152	127	127	238	242	114	186	331	351	236	244	226	230	140	140	203	213	0	0	0	0	0	0	0	0	0	0	140	140	0	0	359	363	340	360	346	352	193	197	173	173	220	222	156	156
2012-Omvik17	Middle	287	295	128	148	123	131	270	274	166	182	339	343	232	249	0	0	140	140	213	217	0	0	0	0	0	0	103	115	0	0	144	148	210	210	359	359	364	368	346	346	191	197	173	173	220	222	154	156
2012-Omvik18	Middle	267	303	136	148	127	183	242	254	138	198	351	363	224	248	234	238	140	144	213	229	120	122	0	0	184	188	0	0	0	0	150	164	0	0	359	363	356	372	346	346	193	197	173	173	220	222	156	156
2012-Omvik19	Middle	291	323	132	148	131	163	238	238	134	198	343	359	244	248	206	254	140	146	221	221	118	126	0	0	0	0	115	115	0	0	140	148	230	230	359	359	326	360	346	352	195	197	173	173	222	222	154	168
2012-Omvik2	Middle	275	291	152	168	127	187	242	246	138	182	331	343	224	224	214	262	140	140	221	225	112	118	90	110	0	0	115	121	0	0	134	140	240	240	359	363	348	372	346	346	197	197	173	173	212	220	156	156
2012-Omvik22	Middle	271	319	124	164	135	143	238	266	122	166	335	355	224	236	222	246	140	144	221	229	116	118	110	110	184	188	103	121	183	197	158	160	240	250	359	365	356	360	346	360	195	197	173	173	220	222	160	168
2012-Omvik23	Middle	275	327	148	152	127	143	238	242	138	174	327	343	224	248	214	242	140	140	221	221	112	118	0	0	0	0	0	0	0	0	0	0	0	0	359	363	352	372	346	346	197	197	173	173	220	220	154	156
2012-Omvik25	Middle	271	311	132	152	131	179	238	266	142	194	347	351	232	248	226	254	142	144	233	243	0	0	0	0	0	0	0	0	0	0	134	140	0	0	363	365	336	356	346	346	193	195	173	175	220	226	154	156
2012-Omvik26	Middle	267	279	124	148	187	187	246	250	190	210	315	315	224	244	238	246	144	144	217	233	120	120	110	110	168	188	107	115	189	201	142	148	240	260	359	365	364	364	346	346	191	197	173	175	222	222	154	156
2012-Omvik27	Middle	275	311	124	124	127	163	250	250	142	142	343	367	232	244	242	254	140	140	233	233	118	118	110	142	192	248	115	121	183	195	142	142	260	280	359	365	332	356	360	360	191	193	173	175	220	222	154	158
2012-Omvik28	Middle	279	327	124	164	131	195	250	262	166	182	319	331	224	244	214	242	144	144	217	221	118	118	0	0	0	0	0	0	0	0	118	160	230	230	359	359	332	376	346	346	191	195	173	181	220	220	154	156
2012-Omvik29	Middle	271	323	132	152	127	183	250	262	186	194	363	367	224	248	242	250	140	140	217	217	112	118	0	0	184	192	115	115	0	0	134	142	250	260	359	363	332	356	346	346	191	191	173	175	210	220	156	158
2012-Omvik3	Middle	275	323	124	124	127	127	250	250	142	142	343	363	224	244	246	250	140	140	203	217	118	118	110	110	192	248	115	121	183	187	134	160	260	280	363	365	332	336	346	360	191	193	173	175	212	220	154	158
2012-Omvik30	Middle	311	327	124	164	123	127	238	254	166	170	339	339	224	224	234	242	140	144	217	217	112	118	110	110	184	188	115	121	197	197	118	140	230	260	359	363	320	376	360	360	191	193	173	181	222	222	156	156
2012-Omvik34	Middle	291	311	148	152	163	187	238	242	126	130	343	367	224	224	242	242	140	140	197	225	122	122	110	110	164	184	103	115	181	197	146	146	260	260	359	365	336	356	346	346	193	197	168	175	220	222	154	154
2012-Omvik35	Middle	263	307	124	152	187	187	238	266	170	178	319	367	224	248	234	242	140	144	221	221	118	120	142	142	168	188	115	121	195	197	142	142	230	280	359	365	352	376	360	360	191	197	173	173	210	222	168	170
2012-Omvik37	Middle	311	315	124	152	131	163	238	246	126	130	319	331	228	232	0	0	140	144	221	229	0	0	0	0	188	188	0	0	0	0	142	160	0	0	359	367	356	364	346	346	191	197	173	173	222	222	154	156
2012-Omvik38	Middle	271	295	124	164	163	195	246	250	174	182	319	319	224	224	218	246	140	140	217	229	118	118	0	0	168	228	115	115	181	191	134	146	210	260	359	365	336	336	346	346	195	197	179	181	222	222	156	158
2012-Omvik39	Middle	303	311	136	164	131	195	238	258	158	194	339	347	232	248	0	0	140	140	217	217	0	0	0	0	0	0	0	0	0	0	0	0	0	0	359	363	320	336	346	346	191	191	173	173	220	222	154	158
2012-Omvik4	Middle	271	295	148	164	131	167	238	246	122	186	335	355	236	244	226	246	140	144	209	217	118	118	0	0	0	0	0	0	0	0	146	160	0	0	359	359	336	340	346	360	191	195	173	175	220	222	156	156
2012-Omvik41	Middle	275	327	148	152	127	187	238	242	166	170	327	331	224	236	230	242	140	140	209	221	118	118	0	0	184	204	115	121	197	197	134	158	290	290	359	365	352	372	346	360	197	197	173	173	220	222	154	154
2012-Omvik42	Middle	283	347	132	152	135	139	238	258	194	194	363	375	232	249	206	250	140	140	229	241	116	118	0	0	188	192	115	121	181	191	134	142	250	260	359	363	332	336	360	360	195	197	173	173	220	220	154	156
2012-Omvik43	Middle	303	335	144	144	143	183	238	246	122	166	327	339	224	245	238	242	140	140	217	225	118	120	0	0	192	200	107	115	0	0	148	148	210	230	359	365	320	330	346	360	197	197	173	173	220	220	154	156
2012-Omvik44	Middle	299	307	124	148	131	143	258	266	166	206	335	343	224	236	206	238	140	144	221	229	116	118	0	0	176	216	115	121	0	0	142	146	260	260	359	359	326	372	346	362	191	191	173	173	210	222	158	172
2012-Omvik45	Middle	295	311	128	152	131	143	238	266	186	190	339	363	232	236	246	254	144	144	209	233	118	118	110	110	176	208	103	121	0	0	142	148	260	260	363	363	332	336	346	346	193	197	173	173	220	222	154	158
2012-Omvik46	Middle	283	295	164	164	131	135	250	266	142	194	331	363	232	248	242	254	140	144	217	233	118	118	0	0	176	200	0	0	187	197	134	134	290	290	363	363	336	356	346	360	191	193	173	175	220	222	158	158
2012-Omvik47	Middle	287	327	124	148	127	127	238	238	174	186	331	331	232	236	206	254	140	144	217	217	118	118	0	0	196	200	0	0	187	197	134	160	210	260	363	365	336	348	346	360	191	197	173	173	220	222	154	156
2012-Omvik48	Middle	283	299	132	164	131	135	238	250	154	194	363	375	232	249	238	250	140	140	201	229	118	120	142	142	188	192	115	121	191	197	142	142	260	290	0	0	332	356	346	346	0	0	173	173	220	220	0	0
2012-Omvik49	Middle	303	323	136	152	127	131	258	262	142	158	339	347	232	248	242	254	140	144	217	217	118	118	0	0	0	0	115	115	0	0	0	0	230	260	359	363	320	356	346	360	191	191	173	175	220	220	154	158
2012-Omvik5	Middle	267	295	124	132	131	159	238	262	178	186	347	347	236	252	214	234	140	140	217	221	116	118	0	0	0	0	103	121	0	0	142	146	0	0	359	363	364	376	346	346	193	193	173	175	210	222	154	156
2012-Omvik50	Middle	259	275	124	152	127	163	242	282	138	166	343	347	224	224	214	250	140	140	217	221	0	0	0	0	204	228	115	115	0	0	134	146	0	0	359	363	336	340	346	346	197	197	173	175	220	222	152	154
2012-Omvik8	Middle	267	335	132	136	139	143	238	246	142	170	343	371	224	244	250	250	140	144	229	233	118	118	0	0	168	204	103	121	0	0	142	150	260	280	360	363	348	372	346	352	191	197	173	173	210	220	156	156
OM17SS-001	Middle	311	323	124	148	131	183	0	0	166	182	319	335	244	244	234	234	140	144	213	225	116	122	102	102	176	196	115	121	191	195	146	160	250	370	363	365	356	360	346	360	193	197	173	173	220	222	154	166
OM17SS-002	Middle	259	307	132	152	131	135	250	258	182	186	319	331	224	248	218	230	144	144	201	213	118	120	90	90	168	200	115	115	195	197	118	138	230	280	359	365	320	326	346	348	191	197	175	175	212	222	156	168
OM17SS-003	Middle	319	323	132	148	131	143	0	0	122	186	339	371	224	244	238	250	140	140	217	229	118	118	86	90	176	184	103	115	191	197	142	148	210	280	359	363	372	376	346	346	193	197	168	173	220	222	156	168
OM17SS-005	Middle	259	275	132	152	135	143	246	250	186	186	319	331	224	252	218	230	140	140	213	229	118	120	90	90	188	200	115	121	191	197	118	138	230	280	365	365	340	352	346	348	195	195	173	175	220	220	156	168
OM17SS-006	Middle	275	335	148	164	147	175	0	0	158	178	307	327	232	249	222	250	140	144	213	237	118	118	90	90	176	188	115	121	191	197	134	164	260	260	359	363	340	348	346	346	191	197	173	173	222	222	156	158
OM17SS-007	Middle	275	339	152	164	127	131	0	0	182	190	0	0	224	240	206	234	140	140	221	229	118	118	90	90	188	188	115	115	181	187	140	146	230	250	363	369	340	340	346	346	197	197	173	173	220	220	152	162
OM17SS-008	Middle	323	331	136	152	123	183	238	266	174	186	335	343	236	240	226	242	140	140	217	229	118	120	90	94	188	192	103	115	181	197	134	142	210	240	359	363	348	352	346	346	191	191	173	173	212	222	156	160
OM17SS-009	Middle	287	327	124	164	127	183	238	258	142	154	339	343	236	249	238	250	140	140	209	217	118	118	90	90	184	204	115	121	197	197	118	146	240	260	359	363	336	376	346	346	191	197	168	173	220	222	156	158
OM17SS-019	Middle	275	311	124	148	131	195	246	250	162	194	327	359	249	249	218	246	144	144	217	217	118	120	90	90	184	192	121	123	191	197	146	148	230	280	359	359	344	360	0	0	193	195	173	173	210	222	154	168
OM17SS-020	Middle	307	311	148	164	127	135	0	0	182	198	351	391	224	252	206	246	140	140	201	217	118	118	90	126	180	236	115	115	191	195	142	146	260	360	363	363	332	360	346	346	193	193	173	173	212	220	154	154
2016-Omvik10	Middle	327	335	132	144	131	143	262	266	122	162	323	339	224	248	238	242	140	140	205	237	0	0	0	0	188	196	0	0	0	0	146	148	260	260	359	363	348	360	346	360	191	197	173	175	220	222	154	156
2016-Omvik11	Middle	291	323	148	152	143	195	250	258	142	142	311	363	232	232	242	250	140	144	197	217	116	120	0	0	196	208	115	123	187	189	144	146	250	260	359	363	336	372	346	352	195	197	168	175	212	222	154	156
2016-Omvik12	Middle	295	295	128	148	143	143	238	254	130	150	339	367	232	236	234	254	0	0	203	229	0	0	0	0	0	0	0	0	0	0	140	160	0	0	360	365	328	364	346	360	191	195	173	173	220	226	154	156
2016-Omvik13	Middle	283	295	124	152	135	187	238	242	174	194	351	351	224	244	210	242	136	140	217	217	0	0	0	0	0	0	0	0	0	0	146	146	210	210	363	367	326	368	346	360	193	193	173	173	220	222	150	156
2016-Omvik14	Middle	291	307	132	132	131	163	242	262	114	178	331	367	236	249	226	234	140	144	229	229	0	0	0	0	172	188	121	121	197	197	142	158	260	290	0	0	352	364	346	360	0	0	173	173	222	222	0	0
2016-Omvik17	Middle	287	295	132	164	143	183	238	238	198	218	331	351	224	224	234	234	140	140	213	217	0	0	0	0	0	0	107	115	195	197	146	160	210	210	0	0	320	356	346	360	191	191	173	173	220	222	0	0
2016-Omvik18	Middle	307	347	124	124	147	183	238	246	162	186	319	375	232	244	0	0	140	144	201	217	0	0	0	0	0	0	0	0	0	0	148	160	0	0	365	367	336	380	346	346	191	197	173	173	222	222	156	156
2016-Omvik19	Middle	279	287	124	152	143	143	246	250	178	182	347	355	232	232	238	242	140	140	217	229	0	0	0	0	196	196	0	0	0	0	138	148	210	210	357	363	352	356	346	346	193	197	173	173	212	222	156	158
2016-Omvik20	Middle	275	299	132	148	147	159	238	250	142	146	335	347	216	216	202	238	144	144	213	225	0	0	0	0	0	0	0	0	0	0	142	148	0	0	359	365	360	360	346	360	197	197	173	175	220	220	154	154
2016-Omvik22	Middle	283	311	124	164	167	171	250	266	162	194	347	347	224	232	250	258	144	144	217	221	0	0	0	0	0	0	0	0	0	0	146	146	0	0	365	365	332	356	346	360	191	197	173	173	222	222	154	160
2016-Omvik23	Middle	299	311	132	148	139	143	246	250	166	174	331	339	224	244	230	238	140	140	217	221	0	0	0	0	0	0	0	0	0	0	134	160	210	210	359	359	348	356	346	346	191	195	173	175	220	222	156	158
2016-Omvik24	Middle	299	347	144	144	143	143	270	270	138	202	323	347	232	244	206	206	140	140	213	237	0	0	0	0	0	0	115	121	0	0	134	146	290	290	359	359	340	364	346	346	193	193	173	179	220	222	156	156
2016-Omvik25	Middle	279	287	132	140	131	155	246	250	158	178	351	355	224	232	242	250	140	140	217	229	0	0	0	0	176	200	115	115	0	0	138	148	210	290	363	363	326	352	346	360	193	197	173	177	222	222	156	156
2016-Omvik26	Middle	271	283	132	152	135	187	234	262	142	166	339	343	236	244	226	230	140	140	217	233	0	0	0	0	0	0	115	121	0	0	140	148	210	230	359	359	336	356	346	346	191	191	173	173	222	222	158	160
2016-Omvik29	Middle	291	327	128	148	123	195	242	242	170	178	351	363	224	236	230	234	140	140	229	229	0	0	0	0	0	0	0	0	0	0	142	148	0	0	359	363	360	360	360	360	197	197	173	175	212	222	154	168
2016-Omvik30	Middle	275	287	132	148	135	171	242	242	170	178	343	363	224	252	226	234	140	140	217	229	118	118	0	0	180	208	121	121	0	0	142	160	210	210	359	363	336	360	352	360	197	197	173	175	220	222	154	154
2016-Omvik5	Middle	263	283	152	152	131	183	238	238	198	218	339	351	224	244	234	234	140	140	213	217	120	120	0	0	200	228	0	0	0	0	146	160	0	0	359	365	320	356	354	360	193	197	173	173	220	222	156	156
2016-Omvik51	Middle	267	275	148	148	127	143	238	266	166	174	343	359	236	244	0	0	144	144	225	229	0	0	0	0	0	0	0	0	0	0	136	146	0	0	359	359	352	368	346	360	191	191	173	175	220	222	156	170
2016-Omvik52	Middle	299	323	148	164	171	195	250	258	118	194	311	319	224	224	0	0	140	140	217	229	0	0	0	0	0	0	0	0	0	0	142	146	0	0	363	367	336	336	346	360	197	197	173	181	220	222	154	156
2016-Omvik54	Middle	291	331	148	148	127	143	238	258	138	158	351	403	232	232	234	254	140	144	197	233	0	0	0	0	0	0	115	115	0	0	148	148	210	210	359	359	340	372	346	360	195	197	173	177	212	220	154	154
2016-Omvik55	Middle	275	283	132	152	135	143	238	242	142	142	331	335	224	232	226	238	140	140	213	221	116	120	0	0	176	188	115	121	181	195	142	160	250	260	359	363	328	356	346	346	197	201	173	179	220	222	154	156
2016-Omvik59	Middle	275	287	148	148	131	135	238	246	154	186	343	355	232	244	234	234	140	140	217	225	118	118	0	0	0	0	0	0	0	0	140	142	290	290	359	359	336	368	346	346	193	197	175	177	212	222	156	166
2016-Omvik63	Middle	267	315	132	148	123	191	242	262	130	174	351	359	224	232	234	234	140	140	217	217	0	0	0	0	0	0	0	0	0	0	140	140	0	0	359	359	380	380	346	346	197	197	173	173	220	220	156	170
2016-Omvik64	Middle	271	323	152	164	127	131	242	246	186	194	335	351	232	244	206	242	140	146	213	243	0	0	0	0	0	0	103	115	0	0	140	148	0	0	360	365	336	356	346	346	191	193	173	175	222	222	154	156
2016-Omvik66	Middle	255	295	152	152	123	131	246	258	146	166	331	363	232	244	0	0	140	140	0	0	0	0	0	0	0	0	0	0	0	0	146	148	0	0	359	365	324	344	346	346	195	197	173	173	222	222	156	156
2016-Omvik67	Middle	275	319	152	164	131	131	250	254	154	162	371	379	244	248	0	0	140	140	0	0	0	0	82	82	0	0	0	0	0	0	160	160	0	0	359	359	336	336	346	346	189	197	173	175	222	222	154	154
2016-Omvik7	Middle	291	331	148	148	127	139	0	0	138	158	351	403	224	232	210	242	140	140	213	229	0	0	0	0	168	208	0	0	0	0	118	144	0	0	359	363	340	372	352	360	197	197	173	177	212	220	154	154
2016-Omvik8	Middle	279	327	124	140	151	159	238	246	166	182	355	367	249	252	0	0	140	140	213	219	0	0	0	0	0	0	0	0	0	0	134	146	0	0	365	367	332	344	346	346	191	197	173	173	212	220	160	172
2016-Omvik9	Middle	279	291	124	152	131	143	254	258	166	170	331	355	244	244	242	254	140	140	213	229	0	0	0	0	0	0	117	117	0	0	142	160	230	230	359	363	332	332	346	346	193	197	173	173	210	220	154	156
OM18SS-004	Middle	271	311	124	140	135	183	238	242	154	186	331	371	224	252	222	246	140	144	201	237	118	120	82	82	188	208	115	123	0	0	134	140	260	260	359	359	336	340	346	352	193	197	173	177	220	220	154	156
OM18SS-005	Middle	323	331	132	148	123	131	238	266	166	186	331	363	236	240	206	250	140	140	213	233	118	118	94	98	168	208	115	115	191	193	134	140	230	260	363	367	328	352	346	346	197	197	173	173	222	222	156	160
OM18SS-006	Middle	259	275	148	148	143	147	242	258	138	194	327	327	224	248	218	242	140	144	217	221	118	120	90	90	184	192	115	123	187	191	134	146	280	290	359	359	328	344	346	362	195	197	173	173	220	222	154	168
OM18SS-007	Middle	275	327	148	152	127	143	238	238	170	198	315	327	224	224	214	230	140	140	221	229	118	118	0	0	184	224	115	121	0	0	134	134	260	260	359	365	336	344	346	346	197	197	173	173	212	222	154	168
OM18SS-008	Middle	255	303	124	148	127	127	238	262	118	118	319	319	236	248	234	246	144	144	0	0	118	120	90	90	184	244	115	115	0	0	134	144	230	230	359	367	332	336	346	360	193	193	173	175	220	222	154	156
OM18SS-009	Middle	0	0	148	148	143	147	0	0	0	0	0	0	0	0	206	222	140	144	0	0	118	120	0	0	188	252	103	121	0	0	136	158	0	0	359	359	356	368	346	346	191	197	173	173	222	222	156	172
OM18SS-010	Middle	0	0	148	160	127	131	238	238	146	158	0	0	232	236	242	242	140	144	209	227	118	120	94	94	176	180	115	115	191	191	146	154	210	230	363	367	326	352	346	346	195	197	173	173	212	220	158	168
OM18SS-012	Middle	275	295	164	164	143	171	242	258	118	182	315	315	224	236	238	262	140	144	197	213	118	120	94	110	172	188	103	103	0	0	136	160	210	280	363	363	344	364	346	360	195	197	173	173	222	222	150	154
OM18SS-013	Middle	275	303	124	148	123	131	238	266	118	142	307	343	224	232	234	246	144	144	213	229	118	118	102	118	200	264	115	123	187	197	118	160	230	260	365	367	336	336	346	352	195	197	173	173	210	220	138	158
OM18SS-014	Middle	283	295	128	148	131	143	246	254	170	186	327	331	224	244	202	226	140	140	225	243	118	118	86	114	176	176	121	121	191	195	134	140	260	260	367	367	336	340	346	360	191	193	173	173	212	220	156	156
OM18SS-015	Middle	263	303	132	148	131	143	238	254	154	186	327	327	232	249	238	238	140	144	197	217	120	122	102	118	168	180	121	123	197	197	134	144	210	260	363	363	344	356	346	360	193	193	173	173	222	222	156	156
OM18SS-016	Middle	251	279	132	132	131	167	234	258	138	166	327	375	232	232	222	234	140	144	217	217	118	118	90	110	176	196	103	117	191	195	142	160	210	260	0	0	336	360	346	352	191	197	173	173	220	222	154	156
OM18SS-017	Middle	279	323	132	168	143	143	238	246	166	198	355	371	224	232	214	226	140	144	217	229	118	118	90	98	176	176	103	115	191	193	142	148	210	290	359	363	360	372	346	346	193	197	173	175	220	222	156	168
OM18SS-018	Middle	311	315	124	148	127	131	250	258	154	154	315	355	240	260	250	250	140	140	217	217	118	118	90	94	188	188	115	121	181	181	136	148	260	260	363	363	0	0	0	0	191	197	0	0	0	0	160	166
OM18SS-019	Middle	303	327	124	148	135	147	246	250	150	194	327	359	224	249	218	246	140	144	217	217	118	118	90	90	184	192	115	123	0	0	142	146	230	260	359	359	336	344	346	362	193	193	173	173	210	222	160	170
OM18SS-020	Middle	311	327	124	124	131	159	246	258	170	206	367	367	232	249	206	226	140	144	213	221	116	116	90	90	172	188	115	115	187	191	140	146	210	260	359	359	340	360	346	360	195	197	173	175	220	222	154	156
OM18SS-021	Middle	259	303	132	148	143	187	258	266	114	118	323	379	232	232	238	246	144	144	213	217	118	120	0	0	180	200	103	115	0	0	118	160	260	280	359	365	344	368	346	352	191	193	173	173	220	222	156	158
OM18SS-022	Middle	315	327	132	148	143	167	250	258	178	186	335	379	224	244	234	246	140	140	197	233	122	122	0	0	180	184	107	115	187	191	134	136	260	290	359	365	336	360	346	352	193	193	173	173	222	222	154	156
OM18SS-023	Middle	287	315	144	148	127	135	238	246	158	194	319	343	232	240	242	254	140	140	225	225	118	120	90	94	188	196	115	115	181	187	140	144	210	230	363	363	324	368	346	360	193	193	173	173	220	220	156	156
OM18SS-024	Middle	299	311	124	152	131	131	238	258	178	186	331	355	224	240	234	254	140	144	213	229	118	122	98	114	188	200	115	117	195	195	134	160	210	260	367	367	326	364	346	346	193	193	173	173	210	212	156	158
OM18SS-025	Middle	307	311	124	148	131	163	238	258	142	186	327	339	240	240	242	254	140	140	197	213	116	122	98	98	184	188	103	115	183	197	134	158	260	260	359	367	326	360	346	360	193	197	173	173	222	222	156	162
OM18SS-026	Middle	287	311	124	152	131	131	238	258	142	178	327	355	236	240	234	254	140	144	221	229	122	122	90	98	188	200	115	117	183	183	134	160	210	260	363	367	0	0	0	0	193	193	0	0	222	222	156	156
OM18SS-027	Middle	275	287	132	144	135	163	246	258	174	178	335	351	224	240	206	230	140	140	197	225	118	120	90	94	188	196	115	121	0	0	140	144	230	300	359	363	324	368	346	360	193	193	173	173	220	220	156	156
OM18SS-028	Middle	299	307	124	128	127	163	238	258	142	206	331	339	240	240	206	254	140	140	197	213	118	122	98	98	184	200	103	115	181	183	134	158	260	280	360	367	326	368	346	346	193	197	173	173	222	222	156	156
OM18SS-029	Middle	303	315	144	148	127	131	238	258	178	194	0	0	232	232	206	230	140	140	197	225	116	118	0	0	188	196	115	115	0	0	142	144	0	0	363	365	324	336	346	360	193	193	173	173	220	222	156	156
OM18SS-030	Middle	307	311	124	128	127	163	238	266	142	186	327	331	236	240	242	254	140	140	197	229	116	118	98	98	184	188	103	115	181	197	158	160	260	280	360	367	348	368	346	360	193	197	173	173	222	222	156	156
OM18SS-031	Middle	275	287	132	148	131	131	250	258	158	162	343	355	232	240	202	230	140	140	225	229	116	116	0	0	196	208	115	121	181	197	144	164	290	300	363	365	356	368	360	380	191	193	173	175	222	222	154	156
OM18SS-032	Middle	303	307	148	148	143	147	238	250	170	206	335	359	224	240	222	242	140	140	221	229	118	120	102	102	188	208	103	117	181	187	136	158	260	260	359	359	356	368	346	346	195	197	173	175	222	222	156	158
OM18SS-033	Middle	287	295	132	148	127	131	238	246	146	166	339	347	240	244	246	262	140	144	213	213	118	122	94	94	200	260	115	115	0	0	144	146	210	230	359	367	326	368	346	346	191	195	173	173	220	222	168	168
OM18SS-034	Middle	279	311	124	136	163	195	238	250	118	150	319	343	232	249	238	242	144	146	217	229	118	122	90	90	172	204	115	121	181	197	142	146	230	260	359	359	0	0	0	0	191	195	175	175	0	0	156	160
OM18SS-035	Middle	263	315	128	132	131	187	238	262	126	150	319	331	244	249	234	238	140	144	209	213	118	120	90	98	184	200	115	121	181	195	134	142	230	280	363	367	336	340	346	346	195	197	173	173	210	222	156	176
OM18SS-036	Middle	251	311	132	168	143	187	238	242	154	162	315	327	224	232	218	234	140	144	225	225	118	118	94	130	172	256	115	121	181	187	134	164	210	360	359	363	320	364	346	346	193	197	173	173	214	222	152	156
OM18SS-037	Middle	303	307	128	148	147	163	238	250	138	186	339	343	216	232	222	242	140	140	221	229	118	120	82	94	188	208	103	121	181	201	134	142	260	280	359	360	332	360	346	360	191	197	173	173	222	226	156	158
OM18SS-038	Middle	295	339	132	136	131	167	258	258	170	174	0	0	244	244	206	242	140	140	213	227	118	118	106	106	196	208	121	121	0	0	142	164	250	250	359	363	340	364	346	348	191	193	173	173	220	220	158	162
OM18SS-039	Middle	303	303	132	148	131	135	242	246	162	178	0	0	224	244	206	230	140	140	225	229	116	116	0	0	180	208	115	121	0	0	134	160	250	250	363	365	336	356	360	380	191	193	173	175	222	222	154	156
OM18SS-040	Middle	275	307	124	152	127	147	238	246	122	158	335	343	249	249	222	238	140	140	203	213	118	120	0	0	168	200	115	121	181	181	146	164	210	230	359	363	326	360	346	346	197	201	173	173	220	222	154	154
OM18SS-041	Middle	323	327	148	152	131	143	238	246	122	162	319	351	224	249	238	242	140	144	229	237	118	118	90	90	184	196	115	115	187	189	160	164	230	250	359	359	340	364	346	346	191	195	173	173	220	220	156	168
OM18SS-042	Middle	275	311	132	132	127	139	242	242	154	186	327	355	224	249	202	234	140	144	213	225	112	116	90	102	172	176	115	115	181	193	140	146	230	360	359	359	0	0	0	0	193	197	0	0	0	0	152	156
OM18SS-043	Middle	303	307	128	148	147	163	238	250	138	186	335	359	216	232	222	242	140	144	213	217	118	120	90	90	188	208	103	121	0	0	136	158	260	280	359	360	332	360	346	360	191	197	173	175	222	226	156	172
OM18SS-044	Middle	279	323	148	164	131	179	238	270	166	198	355	371	232	232	226	238	144	144	217	241	118	120	90	98	176	176	103	115	187	193	142	148	250	280	359	359	360	376	346	346	193	203	173	175	220	222	158	168
OM18SS-045	Middle	299	307	128	148	127	143	238	258	142	186	327	339	236	240	242	246	140	140	213	229	122	122	0	0	184	184	103	115	0	0	134	142	0	0	359	365	348	360	346	346	193	197	173	173	212	222	158	162
OM18SS-047	Middle	303	323	132	148	143	155	238	258	114	162	359	379	232	244	222	238	140	144	213	221	118	120	82	90	200	200	115	121	0	0	144	144	210	280	359	365	344	356	346	362	193	193	173	173	222	222	156	156
OM18SS-048	Middle	303	327	124	132	131	139	250	282	130	162	351	395	244	244	222	234	140	140	213	245	118	118	0	0	172	208	115	115	0	0	142	144	250	250	359	359	360	366	346	360	195	197	173	179	222	222	156	156
OM18SS-049	Middle	263	303	124	128	147	167	258	258	166	166	311	395	224	249	234	250	140	144	213	217	118	120	90	90	188	204	115	121	193	193	118	146	240	240	359	359	368	376	346	346	197	197	173	173	220	222	156	168
OM18SS-050	Middle	323	323	132	168	143	143	238	254	114	154	315	379	232	249	234	250	144	144	221	225	118	120	0	0	180	188	115	121	181	197	144	164	210	210	359	363	0	0	0	0	193	197	0	0	0	0	156	156
OM18SS-051	Middle	299	311	132	152	143	187	246	258	182	186	327	339	224	232	202	242	140	140	217	225	118	120	0	0	172	180	115	121	0	0	118	134	280	360	359	363	332	348	346	346	191	193	173	173	220	222	156	168
OM18SS-052	Middle	263	287	128	168	131	175	238	238	126	146	327	343	236	244	238	258	140	144	209	229	118	122	90	90	168	172	103	115	181	195	134	160	260	260	359	359	326	336	346	360	193	193	173	173	220	220	156	158
OM18SS-053	Middle	275	279	124	164	127	131	238	250	182	182	351	355	224	244	234	250	144	144	217	217	116	118	0	0	172	188	103	121	0	0	118	142	280	280	359	363	336	368	346	360	191	195	173	173	222	222	156	156
OM18SS-054	Middle	291	291	124	148	143	179	246	266	202	210	343	363	240	244	206	230	140	140	213	229	116	118	0	0	196	212	115	121	0	0	136	142	230	260	359	359	336	352	346	346	191	193	173	173	220	220	152	154
OM18SS-055	Middle	287	291	136	148	131	143	250	278	142	174	319	363	224	249	222	238	140	144	229	229	118	122	0	0	196	204	115	115	189	191	138	142	250	260	365	367	336	380	346	352	193	193	168	173	220	222	154	174
OM18SS-056	Middle	251	323	124	132	143	143	250	254	118	178	327	331	244	249	222	234	140	140	217	217	118	118	106	106	172	228	115	115	0	0	134	136	0	0	363	365	340	356	346	346	191	193	173	173	220	222	156	162
OM18SS-057	Middle	275	307	148	164	167	171	238	250	114	166	319	351	232	252	238	242	140	144	217	233	120	120	94	94	204	224	103	115	187	191	146	146	210	210	357	363	336	352	346	346	0	0	173	173	222	222	168	168
OM18SS-059	Middle	279	311	136	148	131	143	258	262	162	166	351	351	224	249	234	262	140	144	213	221	118	120	90	94	184	208	115	115	195	197	142	154	240	250	367	367	344	360	346	346	195	197	173	177	220	226	156	168
OM18SS-060	Middle	275	287	128	152	127	135	234	238	142	186	343	343	232	249	242	246	140	144	197	213	116	118	0	0	192	208	121	121	0	0	118	142	250	260	359	365	332	356	346	360	193	197	173	175	220	222	154	156
OM18SS-061	Middle	275	287	124	152	131	187	242	282	118	142	323	359	224	232	234	246	144	144	213	229	118	120	0	0	200	264	115	123	187	189	134	148	250	250	367	367	316	336	346	352	195	197	173	173	210	220	154	168
OM18SS-062	Middle	263	287	128	132	175	187	238	258	126	154	327	343	236	244	254	258	140	144	209	229	118	122	0	0	180	204	103	123	0	0	142	160	260	260	359	367	326	336	346	360	193	197	173	173	222	222	158	158
OM18SS-063	Middle	259	303	148	148	131	143	238	246	138	194	327	343	248	248	238	242	140	140	213	221	118	120	90	90	184	192	115	121	187	191	134	146	260	260	359	359	336	344	346	346	193	197	173	173	222	222	154	168
OM18SS-064	Middle	275	327	152	152	127	143	238	238	138	178	315	343	224	224	230	230	140	140	221	229	118	118	90	90	204	204	115	121	187	187	134	136	260	290	359	359	336	336	346	346	193	197	173	173	212	220	154	166
OM18SS-065	Middle	267	323	124	132	143	155	238	254	114	162	351	379	232	244	234	238	140	144	221	225	118	118	90	106	172	200	121	123	183	187	118	142	250	280	359	365	356	380	346	346	193	197	173	173	220	222	156	156
OM18SS-066	Middle	275	323	148	168	135	143	238	254	118	158	331	367	244	244	234	238	140	144	221	229	118	120	90	154	196	224	121	123	181	193	146	164	260	280	359	365	0	0	0	0	193	193	0	0	0	0	154	156
OM18SS-067	Middle	275	291	132	136	139	147	238	250	134	142	339	343	244	249	234	242	144	144	221	225	118	118	90	90	200	204	117	121	0	0	134	134	230	290	363	365	332	336	346	360	193	197	168	173	210	222	156	158
OM18SS-068	Middle	275	311	124	148	147	195	250	258	150	194	319	327	224	248	218	246	140	144	217	237	118	118	90	90	184	192	121	123	181	187	142	146	230	260	359	359	336	340	346	360	193	195	173	173	222	222	154	170
OM18SS-069	Middle	259	303	132	148	123	143	258	266	154	166	323	379	224	249	234	246	144	144	213	217	118	120	90	90	172	180	115	121	187	197	118	160	210	260	359	363	336	344	346	352	191	193	173	173	220	220	154	156
OM18SS-071	Middle	259	271	132	152	143	143	238	242	138	142	327	347	224	248	238	242	140	144	221	221	118	122	90	94	188	204	115	115	197	197	134	142	260	290	359	365	328	360	346	346	191	197	173	173	222	222	154	170
OM18SS-072	Middle	275	279	132	140	131	143	246	250	142	166	339	351	224	249	226	250	140	140	213	213	118	120	78	78	196	196	103	115	0	0	134	164	0	0	357	359	340	356	346	346	193	195	173	175	222	222	154	168
OM18SS-073	Middle	0	0	128	148	143	143	242	250	0	0	331	343	224	244	218	242	140	140	221	229	118	118	90	142	188	204	103	103	197	197	142	164	260	290	359	359	336	376	346	346	197	197	173	173	220	222	154	154
OM18SS-074	Middle	323	331	132	148	135	183	238	258	166	174	331	343	240	244	206	250	140	140	213	217	118	118	86	90	192	208	115	115	191	197	134	136	230	260	359	363	0	0	0	0	197	197	0	0	0	0	156	172
OM18SS-075	Middle	303	323	132	148	143	155	238	258	114	162	359	379	248	249	222	238	140	144	213	221	118	120	102	102	180	200	115	123	187	197	144	144	210	280	359	363	356	380	346	362	193	197	173	179	222	222	156	158
OM18SS-076	Middle	275	311	124	148	131	135	250	258	150	194	319	327	224	249	238	246	144	144	213	217	118	118	90	90	184	188	121	121	187	191	146	148	230	260	359	359	336	344	346	360	193	195	173	173	222	222	154	170
OM18SS-077	Middle	287	323	160	168	135	147	238	258	154	174	339	367	244	244	214	242	140	144	213	229	116	118	90	98	196	200	115	121	189	191	148	164	230	260	359	365	336	336	346	346	191	193	173	173	210	220	154	156
OM18SS-078	Middle	323	331	152	156	135	183	238	238	174	174	335	343	244	249	206	226	140	140	217	229	118	120	86	86	188	192	115	115	0	0	134	142	240	260	359	363	352	356	346	346	191	191	173	173	222	222	154	160
OM18SS-079	Middle	259	287	124	152	131	187	266	282	118	142	323	359	224	232	238	246	144	144	213	229	116	118	102	118	172	264	103	123	187	197	134	160	250	280	359	365	336	368	346	352	191	197	173	173	220	222	158	168
OM18SS-080	Middle	251	259	148	148	143	143	238	242	170	170	339	343	248	252	230	258	140	140	221	225	118	120	90	90	204	208	115	115	187	197	142	144	260	290	359	359	328	364	346	346	197	197	173	179	220	222	154	156
OM18SS-081	Middle	275	311	132	140	135	143	242	250	178	182	343	351	236	249	230	246	140	140	221	241	112	120	0	0	172	200	121	121	197	197	148	160	210	260	363	363	326	360	360	360	195	197	173	173	212	222	156	168
OM18SS-082	Middle	283	299	124	148	127	127	238	238	118	170	323	327	240	248	246	246	140	144	197	233	118	122	90	90	184	244	115	123	183	195	134	146	230	290	367	367	0	0	0	0	193	193	0	0	0	0	154	156
OM18SS-083	Middle	271	287	132	152	131	143	238	270	166	170	343	343	232	236	218	246	140	144	197	221	120	120	90	90	192	196	115	121	181	181	118	146	260	260	363	367	326	336	352	352	195	197	173	173	220	222	156	168
OM18SS-084	Middle	271	323	132	164	131	163	238	266	126	182	331	351	224	244	234	246	140	146	213	233	118	120	90	90	184	200	115	115	0	0	118	148	210	240	360	365	336	364	346	346	191	197	173	175	220	222	154	168
OM18SS-085	Middle	275	311	136	144	131	147	238	258	134	162	323	339	232	249	234	242	140	144	213	225	118	118	94	98	176	188	115	121	0	0	134	154	230	250	363	365	332	344	346	360	195	197	173	173	210	222	150	156
OM18SS-086	Middle	287	299	132	152	127	143	238	238	170	186	343	383	244	249	226	238	140	144	197	233	120	122	0	0	204	208	115	115	0	0	118	134	230	290	359	359	356	372	346	360	193	197	173	175	220	220	154	154
OM18SS-087	Middle	271	275	148	156	143	163	246	250	154	210	315	363	224	236	230	234	140	144	209	213	112	118	0	0	176	224	115	121	0	0	136	140	210	260	359	363	340	376	346	346	195	197	173	173	220	220	154	156
OM18SS-001	Middle	0	0	124	132	167	195	0	0	0	0	0	0	0	0	0	0	140	144	0	0	118	118	90	94	184	192	103	115	191	191	140	142	0	0	359	367	330	348	346	360	191	197	173	173	210	222	154	160
US17SS-001	Middle	275	335	132	132	135	139	238	238	130	174	331	339	0	0	234	234	140	144	0	0	116	120	0	0	184	196	103	115	181	195	134	148	210	230	359	363	364	368	346	346	193	193	173	173	210	222	154	156
US17SS-002	Middle	275	303	152	168	135	163	246	250	190	214	335	363	224	236	250	254	144	144	209	209	118	118	94	122	208	252	103	107	197	197	140	142	250	260	363	363	336	360	346	346	191	197	173	177	220	222	154	158
US17SS-003	Middle	291	295	132	168	127	163	250	250	142	142	343	351	224	224	238	254	140	140	213	217	118	122	90	90	188	200	121	121	191	197	142	164	0	0	359	367	340	372	346	346	191	197	173	173	220	222	154	154
US17SS-004	Middle	275	315	148	156	143	171	238	238	158	186	363	391	224	244	206	254	140	144	217	229	118	120	102	130	196	200	115	115	187	197	134	154	260	360	359	363	328	360	346	346	191	197	173	173	220	222	156	156
US17SS-005	Middle	303	315	128	132	127	147	238	242	130	142	347	371	232	232	222	246	140	144	209	217	118	118	0	0	0	0	0	0	0	0	0	0	0	0	363	363	322	364	346	346	191	191	168	173	220	220	156	158
US17SS-006	Middle	299	315	156	164	135	135	238	238	130	210	315	391	224	228	206	234	144	144	209	227	118	120	94	102	176	204	103	115	181	197	134	142	210	260	359	363	360	368	346	346	191	197	173	173	220	220	156	156
US17SS-007	Middle	315	323	148	152	127	163	250	254	142	158	351	383	224	252	234	242	140	144	213	225	118	122	0	0	0	0	0	0	0	0	0	0	0	0	363	365	356	368	346	360	191	193	173	175	220	222	154	168
US17SS-008	Middle	259	275	132	152	143	147	0	0	174	210	335	399	224	236	234	238	140	144	217	217	118	118	90	90	172	172	115	121	181	187	134	142	0	0	359	363	0	0	346	346	191	197	173	173	220	220	156	158
US17SS-009	Middle	275	279	148	164	127	163	238	254	174	182	363	371	244	249	250	254	140	144	217	217	118	120	90	114	184	204	115	123	195	197	134	142	260	290	359	359	360	372	346	346	191	197	173	173	220	222	154	168
US17SS-010	Middle	275	275	148	148	131	147	250	258	154	166	343	347	228	244	206	234	140	144	213	217	118	120	90	94	188	196	115	115	187	197	146	148	260	360	359	363	340	372	346	346	191	197	173	173	210	220	154	156
US17SS-011	Middle	259	275	136	148	123	143	254	258	154	190	327	347	224	232	222	230	140	144	213	217	118	120	90	94	168	196	115	115	197	217	146	146	260	290	359	365	336	368	346	346	191	197	173	173	210	222	156	156
US17SS-012	Middle	287	291	148	152	139	143	234	238	182	190	315	355	224	232	226	230	140	144	209	217	118	120	90	94	192	204	103	121	187	195	142	144	260	360	359	363	348	348	0	0	191	191	0	0	0	0	156	168
US17SS-013	Middle	299	299	132	148	143	167	242	258	174	186	355	355	244	244	226	250	140	144	217	221	118	122	90	102	188	188	121	121	197	213	134	154	210	250	359	367	348	352	346	362	197	197	173	173	222	222	154	172
US17SS-014	Middle	295	343	148	148	123	147	250	258	166	174	327	355	232	248	206	222	140	144	203	213	112	118	90	98	200	204	115	115	195	197	140	148	210	280	363	363	356	372	346	360	191	197	173	175	222	224	156	156
US17SS-015	Middle	279	283	128	152	143	143	238	242	158	170	319	363	244	244	230	254	140	140	217	225	118	118	90	94	176	184	115	121	195	195	134	134	210	240	359	367	322	372	346	352	193	197	173	173	222	226	154	168
US17SS-016	Middle	295	307	124	132	143	147	250	250	154	170	339	399	224	244	230	230	144	146	209	209	118	118	90	90	172	172	115	115	181	187	142	142	260	260	359	363	356	364	346	346	191	197	173	173	220	222	156	156
US17SS-017	Middle	299	315	132	144	135	135	246	250	202	210	315	363	236	244	206	234	144	144	209	213	118	120	94	102	176	252	103	115	181	197	134	142	210	260	363	363	324	360	346	346	191	197	173	173	210	220	156	156
US17SS-018	Middle	291	295	128	132	147	163	238	242	170	198	343	383	232	236	230	234	140	140	217	221	118	120	94	94	184	188	115	123	181	197	118	134	230	260	363	365	332	368	346	346	195	197	173	173	212	222	154	160
US17SS-019	Middle	307	331	148	152	135	171	238	238	154	198	327	339	224	224	234	234	140	144	209	217	118	118	94	114	196	228	115	121	181	187	118	146	250	260	359	363	344	356	346	346	191	197	173	173	222	222	156	156
US17SS-020	Middle	299	307	148	148	163	167	238	246	182	190	363	391	244	249	230	238	140	144	213	217	118	122	90	114	196	244	115	121	187	195	134	146	290	360	359	363	360	364	346	346	191	201	173	173	220	222	156	156
US17SS-021	Middle	275	331	124	132	135	171	242	246	178	202	331	359	224	252	234	250	140	144	209	243	118	120	94	130	188	196	115	121	181	193	146	148	210	290	359	363	344	368	346	360	197	197	173	173	210	224	154	156
US17SS-022	Middle	299	303	124	132	131	159	238	270	162	166	351	359	232	252	234	238	140	140	209	213	118	120	90	98	180	200	115	115	191	197	142	148	250	260	359	359	344	368	346	360	191	197	173	173	222	222	156	156
US17SS-023	Middle	295	323	124	148	135	147	242	258	174	202	327	399	236	244	206	230	140	142	229	229	118	120	90	90	176	208	115	115	187	191	134	136	260	260	359	365	332	344	346	346	191	197	173	173	212	222	154	158
US17SS-024	Middle	283	323	124	164	147	147	258	258	166	202	355	399	224	236	230	234	140	140	217	229	118	118	90	90	192	208	115	115	187	191	134	136	260	360	359	363	332	344	346	346	191	201	173	173	222	226	156	158
US17SS-025	Middle	275	299	152	164	143	167	238	258	166	170	315	347	224	228	234	250	140	140	201	203	112	120	90	94	172	192	103	103	191	191	142	148	290	360	359	367	332	364	346	346	191	199	175	175	210	220	156	168
US17SS-026	Middle	295	343	148	148	123	131	238	250	174	186	319	355	232	248	222	226	140	140	209	213	118	120	98	118	200	204	115	115	181	197	140	148	260	280	359	363	368	372	352	360	193	197	173	175	210	222	154	156
US17SS-027	Middle	287	315	136	152	135	139	238	238	130	170	0	0	224	244	226	234	140	140	0	0	118	120	86	130	196	248	115	121	195	197	142	142	230	260	359	363	336	372	346	346	191	191	173	175	220	222	156	160
US17SS-028	Middle	307	327	124	152	143	171	238	250	154	190	339	363	224	244	222	230	140	140	209	233	118	118	94	98	184	196	115	115	195	197	142	160	250	360	359	359	332	352	346	346	191	191	173	173	220	222	154	156
US17SS-029	Middle	291	343	148	168	135	163	238	274	142	182	343	399	224	236	238	250	140	140	225	233	118	122	94	102	196	200	115	121	193	197	134	160	230	260	359	367	368	372	346	346	191	197	173	173	220	222	154	156
US17SS-030	Middle	311	311	124	132	143	143	242	242	114	154	351	355	224	236	238	238	140	144	213	229	116	118	98	130	168	184	115	123	191	191	134	142	260	280	359	367	332	344	346	360	193	197	173	173	212	212	154	156
US17SS-031	Middle	311	311	124	148	143	191	238	242	166	186	351	355	0	0	0	0	0	0	0	0	0	0	98	130	192	200	123	123	191	191	134	142	260	280	359	367	332	344	346	346	191	197	173	173	212	222	154	156
US17SS-032	Middle	0	0	148	152	143	163	0	0	158	158	0	0	0	0	234	234	140	140	217	233	118	118	114	134	192	196	115	115	187	195	134	140	240	260	359	359	326	340	346	352	197	197	173	173	222	222	156	156
US17SS-033	Middle	283	307	144	152	143	171	0	0	138	174	0	0	232	249	226	254	140	144	213	217	118	120	0	0	0	0	0	0	0	0	0	0	0	0	359	359	356	364	346	346	193	197	173	175	220	222	154	156
US17SS-034	Middle	279	303	124	132	131	167	238	238	142	182	335	343	232	232	222	234	140	144	221	221	118	118	98	126	172	204	115	115	181	195	118	160	230	230	359	359	336	336	346	346	197	197	173	173	220	222	154	156
US17SS-035	Middle	275	327	124	152	127	143	238	262	154	182	315	343	232	236	234	250	140	140	233	233	116	118	126	134	196	208	121	121	193	197	142	142	230	360	359	363	352	364	346	352	191	197	173	173	220	220	154	156
US17SS-036	Middle	279	295	144	148	159	167	242	258	166	170	315	327	232	244	222	254	140	144	217	217	118	122	90	94	176	188	115	121	197	203	134	146	240	260	365	367	332	336	360	362	191	197	173	173	222	226	156	172
US17SS-037	Middle	311	315	148	152	143	147	238	242	142	182	339	375	236	244	230	238	140	144	0	0	118	120	86	90	172	172	115	121	181	191	146	160	260	260	363	367	332	332	346	348	191	197	173	173	212	220	156	156
US17SS-038	Middle	287	315	140	148	127	135	238	246	170	182	339	343	224	232	238	242	140	140	233	233	116	120	90	90	184	240	121	123	181	187	158	160	250	290	359	365	364	392	346	346	197	197	173	179	220	222	154	154
US17SS-039	Middle	271	323	124	132	143	147	238	250	154	166	351	399	0	0	0	0	0	0	0	0	0	0	90	94	172	200	109	115	195	197	138	142	280	360	359	365	332	364	346	346	191	197	173	173	222	222	150	158
US17SS-040	Middle	283	311	128	148	127	131	238	258	142	170	319	355	244	249	202	234	144	144	201	213	118	118	0	0	0	0	0	0	0	0	0	0	0	0	359	367	356	376	346	346	191	197	173	173	212	226	154	156
US17SS-041	Middle	275	319	132	168	127	127	242	278	126	214	371	383	232	236	254	254	140	144	213	233	118	118	90	94	196	204	103	115	181	197	142	142	260	280	359	363	336	364	346	346	197	197	173	177	210	220	156	158
US17SS-042	Middle	263	275	124	148	131	163	238	270	138	142	323	343	224	224	218	230	140	140	209	217	118	120	94	130	168	224	103	115	191	217	146	160	260	290	359	363	0	0	0	0	191	191	0	0	0	0	156	156
US17SS-043	Middle	291	303	128	164	131	131	258	258	154	186	355	371	232	244	234	246	140	144	213	221	118	118	90	90	184	252	115	123	191	191	142	158	260	260	359	367	344	356	346	346	197	197	173	177	222	222	156	156
US17SS-044	Middle	291	295	124	132	163	163	0	0	142	202	343	351	224	224	254	254	140	140	229	233	118	118	102	114	188	200	121	121	191	197	134	160	260	290	359	367	368	372	346	360	191	191	173	173	220	222	154	156
US17SS-045	Middle	259	283	132	168	127	155	250	254	142	198	343	347	236	236	242	250	140	144	0	0	118	118	90	94	188	204	107	115	195	197	118	146	210	260	359	365	332	368	346	346	191	195	173	175	212	222	156	158
US17SS-046	Middle	311	371	132	164	131	135	250	258	122	190	383	407	236	244	230	254	140	140	0	0	118	118	90	90	188	192	103	115	195	217	144	160	260	260	359	365	340	368	346	346	191	197	173	173	220	222	156	174
US17SS-047	Middle	287	299	152	152	143	183	238	242	166	166	331	343	0	0	206	206	140	140	0	0	0	0	90	130	172	192	103	103	187	191	140	146	260	260	359	367	372	380	346	352	191	199	173	173	210	222	156	168
US17SS-048	Middle	275	311	148	164	131	139	238	250	182	186	343	351	228	236	206	234	140	140	213	217	118	120	90	94	168	204	115	121	181	187	134	142	260	260	359	359	344	368	346	352	191	199	173	173	222	224	156	168
US17SS-049	Middle	275	299	148	148	139	167	238	258	186	210	315	339	224	244	206	226	140	140	213	221	116	116	94	94	184	188	103	121	181	197	134	134	210	250	359	367	336	364	346	346	191	191	173	173	210	222	156	172
US17SS-050	Middle	259	303	132	164	139	171	234	238	138	154	339	339	224	244	234	234	140	140	217	225	116	118	90	94	192	196	103	115	187	193	146	146	250	260	359	363	320	356	346	346	191	191	173	173	216	222	156	156
US17SS-051	Middle	275	299	148	152	127	131	238	246	166	174	343	351	232	236	226	226	140	144	213	233	118	120	90	94	200	204	115	121	181	181	142	142	240	260	359	359	356	368	346	346	191	195	173	173	210	224	154	156
US17SS-052	Middle	335	355	148	152	135	143	242	270	130	170	319	403	232	244	226	230	140	144	217	233	118	120	90	130	176	236	115	121	195	197	140	142	260	290	359	363	360	372	346	360	191	197	173	175	220	222	156	160
US17SS-053	Middle	0	0	140	164	127	143	0	0	170	174	399	399	244	252	234	254	140	144	213	233	118	118	130	130	168	240	115	115	195	199	140	148	260	360	363	363	336	364	346	346	191	199	173	173	222	222	156	168
US17SS-054	Middle	327	335	140	152	127	187	242	258	146	174	315	355	224	232	230	242	140	140	203	221	118	118	94	98	188	196	115	115	187	191	136	142	230	260	363	365	344	364	346	360	197	197	173	173	212	224	156	156
US17SS-055	Middle	0	0	0	0	0	0	0	0	0	0	0	0	244	244	222	230	140	140	229	233	118	118	98	114	208	252	115	115	197	197	134	154	360	360	359	365	348	352	346	346	191	197	173	173	222	222	154	158
US17SS-056	Middle	287	319	152	152	131	167	238	242	166	174	315	331	228	236	206	234	140	140	213	213	112	120	0	0	0	0	0	0	0	0	0	0	0	0	365	367	332	364	346	352	199	199	173	173	220	220	156	168
US17SS-057	Middle	283	295	132	148	163	163	246	254	178	198	339	343	224	232	206	242	140	144	217	225	118	120	94	114	188	196	107	115	181	181	118	134	210	260	359	363	336	368	346	346	193	199	173	173	222	222	156	168
US17SS-058	Middle	275	335	124	148	135	135	238	246	154	166	335	343	224	236	234	242	140	140	221	237	118	118	90	130	168	168	115	121	181	195	142	148	210	280	359	367	326	340	346	346	197	197	173	173	212	222	156	156
US17SS-059	Middle	327	335	124	148	143	143	242	246	146	162	315	355	232	244	230	230	140	140	217	229	118	120	90	126	188	196	115	115	187	191	144	146	230	290	363	365	344	368	346	358	197	199	173	173	220	224	156	168
US17SS-060	Middle	279	315	148	152	143	143	242	242	130	150	359	367	236	236	222	238	140	140	213	217	118	118	90	126	188	204	115	121	181	191	142	146	240	250	363	365	340	344	346	346	191	197	173	173	210	212	154	156
US17SS-061	Middle	279	311	132	156	127	135	238	250	130	158	343	355	232	232	202	234	140	144	217	217	118	118	90	94	188	256	115	121	181	181	134	146	260	280	359	359	360	364	346	346	191	197	173	173	222	222	156	156
US17SS-062	Middle	299	315	124	148	147	187	258	258	142	158	311	387	224	232	246	254	140	144	213	229	120	120	0	0	0	0	0	0	0	0	0	0	0	0	363	363	336	340	346	360	191	193	173	173	216	222	154	158
US17SS-064	Middle	291	319	148	152	143	147	250	258	190	190	323	343	244	249	206	250	140	140	209	217	118	120	86	98	192	252	103	115	195	197	144	148	230	260	363	363	332	360	346	346	191	197	173	173	222	222	156	156
US17SS-065	Middle	0	0	0	0	0	0	0	0	0	0	0	0	232	236	230	250	140	144	217	217	118	120	90	90	168	188	115	115	181	217	160	160	230	250	359	359	322	368	346	346	191	193	173	175	220	222	154	154
US17SS-066	Middle	283	307	148	152	143	143	254	258	154	186	335	363	236	248	214	254	140	144	217	229	118	122	90	126	188	192	109	115	195	197	136	146	230	290	365	367	324	372	352	360	191	195	173	173	216	222	154	160
US17SS-067	Middle	283	323	132	148	123	163	238	246	134	174	335	347	232	249	226	242	144	144	217	233	118	120	90	94	176	200	115	123	181	189	134	144	250	290	363	365	356	356	346	346	189	197	173	173	212	222	154	154
US17SS-068	Middle	279	295	124	132	135	191	258	274	174	190	335	335	232	236	242	242	140	144	233	237	116	118	86	90	200	204	121	123	193	195	142	160	210	280	360	367	348	352	346	346	193	193	173	173	210	210	156	162
US17SS-069	Middle	295	339	164	168	131	187	238	262	142	162	323	331	224	232	226	226	140	144	221	229	116	124	90	102	168	196	115	115	193	195	158	160	210	230	359	359	322	336	352	360	193	195	173	173	212	220	156	166
US17SS-070	Middle	279	331	124	148	127	163	238	274	154	174	335	347	224	236	230	234	140	144	209	221	116	120	0	0	0	0	0	0	0	0	0	0	0	0	360	363	320	364	346	346	193	193	173	173	220	222	154	170
US17SS-071	Middle	291	291	124	148	127	195	242	250	134	174	347	359	224	244	226	250	140	144	213	229	116	122	0	0	0	0	0	0	0	0	0	0	0	0	363	365	322	360	346	360	191	197	173	173	222	222	150	158
US17SS-072	Middle	279	335	132	148	127	163	238	238	166	186	343	343	224	249	230	230	140	144	233	237	118	118	90	94	176	200	115	123	193	197	144	148	230	250	363	363	336	352	346	360	193	197	173	173	220	222	154	154
US17SS-073	Middle	0	0	148	148	127	135	0	0	154	174	0	0	0	0	222	254	0	0	0	0	0	0	90	90	180	200	103	103	197	197	134	142	210	260	365	365	360	376	346	360	195	195	173	175	220	222	156	156
US17SS-074	Middle	283	299	148	148	127	163	246	258	142	174	331	331	244	248	218	222	140	144	213	217	112	118	90	90	176	188	121	123	187	191	118	164	280	370	359	363	324	356	346	360	191	197	173	173	222	222	154	168
US17SS-075	Middle	307	323	148	148	123	131	238	270	182	182	315	339	224	224	238	242	140	140	197	217	118	120	94	118	168	200	115	115	195	195	138	146	210	260	359	363	348	372	346	360	191	199	173	173	212	222	154	168
US17SS-076	Middle	279	311	124	132	143	183	258	262	182	186	315	347	236	252	234	242	140	144	213	233	120	120	94	94	204	204	115	123	181	197	134	142	210	210	359	367	356	364	346	346	191	197	173	173	212	220	154	158
US17SS-077	Middle	275	339	128	148	143	143	238	262	126	154	287	347	244	252	230	246	140	140	213	217	118	118	0	0	0	0	0	0	0	0	0	0	0	0	359	363	330	336	346	346	191	197	173	173	220	222	154	158
US17SS-078	Middle	291	303	148	164	143	147	238	254	190	198	351	363	236	244	226	254	140	140	217	233	118	122	0	0	0	0	0	0	0	0	0	0	0	0	359	363	360	380	346	360	193	197	173	173	212	222	154	156
US17SS-079	Middle	259	283	132	148	131	163	0	0	182	198	0	0	224	236	206	234	140	144	225	227	116	118	0	0	0	0	0	0	0	0	0	0	0	0	359	363	344	368	346	346	191	193	173	173	220	222	154	160
US17SS-080	Middle	299	299	124	132	127	191	250	258	142	182	343	355	236	244	238	250	140	144	213	221	116	122	66	114	188	228	103	115	181	193	134	142	250	280	359	365	332	372	346	346	193	197	168	173	212	222	138	156
US17SS-081	Middle	315	331	148	152	135	167	238	250	154	166	367	399	236	236	222	238	140	140	217	233	112	118	90	90	168	192	115	121	187	189	134	140	260	260	359	363	360	372	346	346	191	195	173	175	210	226	154	156
US17SS-082	Middle	283	287	132	148	135	183	238	250	166	182	339	343	216	244	226	234	140	144	217	229	120	122	102	114	168	264	103	107	195	199	142	142	260	260	359	359	336	356	346	360	193	193	173	173	210	222	154	154
US17SS-083	Middle	287	311	124	132	127	127	238	258	126	166	303	315	236	244	226	250	140	144	213	229	118	120	90	114	184	204	103	115	181	191	134	144	250	280	359	359	364	376	346	346	193	197	173	173	222	222	154	158
US17SS-084	Middle	259	315	124	144	127	143	242	270	174	174	331	363	244	248	218	230	140	140	197	233	112	118	90	106	176	196	115	121	181	185	134	134	240	290	359	365	340	372	346	360	193	197	173	173	212	218	154	156
US17SS-085	Middle	287	295	148	148	139	167	238	242	158	190	315	355	224	224	206	222	140	140	0	0	116	120	0	0	0	0	103	115	0	0	142	146	0	0	359	365	356	364	346	360	191	195	173	175	220	222	156	156
US17SS-087	Middle	275	275	148	148	143	167	242	250	198	198	379	379	224	236	234	238	140	140	213	217	118	118	0	0	0	0	0	0	0	0	0	0	0	0	360	363	372	372	346	346	191	193	173	173	220	222	154	158
US17SS-088	Middle	275	287	132	152	143	183	242	250	150	166	303	383	232	236	246	250	140	144	217	229	118	122	90	102	176	184	107	115	181	181	142	144	260	280	359	363	336	360	346	346	193	193	173	173	222	222	156	156
US17SS-089	Middle	275	339	128	132	127	163	242	246	138	174	307	339	224	249	246	250	140	140	203	213	118	118	0	0	0	0	0	0	0	0	0	0	0	0	363	365	360	376	346	360	193	197	173	175	220	222	154	156
US17SS-091	Middle	295	299	124	148	135	135	246	250	170	186	331	383	236	236	230	242	140	140	0	0	118	118	90	98	164	168	115	115	181	197	142	144	250	290	363	363	336	364	346	346	191	197	173	173	212	220	154	158
US17SS-095	Middle	275	283	148	152	135	143	238	262	170	170	327	335	224	236	210	214	144	144	217	229	118	118	0	0	0	0	0	0	0	0	0	0	0	0	365	365	360	364	346	346	191	191	173	173	212	222	154	156
US17SS-096	Middle	291	295	164	164	131	135	254	266	154	166	327	387	224	244	206	230	140	144	213	229	118	118	110	110	188	200	121	121	191	193	140	142	240	280	365	367	326	352	346	352	191	197	173	173	212	222	154	156
US17SS-097	Middle	299	323	148	164	135	147	238	242	154	154	351	359	244	249	222	234	140	144	217	229	116	120	90	90	168	228	103	123	195	197	142	146	250	260	359	363	336	364	346	360	193	197	173	173	220	222	152	156
US17SS-098	Middle	275	299	132	164	143	163	258	258	122	162	315	351	224	236	234	238	140	140	209	213	118	118	94	134	176	248	115	121	193	193	142	148	210	290	363	363	332	356	346	360	193	197	173	175	220	222	154	156
US16SS-010	Middle	287	311	124	132	123	131	238	266	154	162	343	383	232	244	206	226	140	140	227	233	118	120	90	94	188	208	103	103	181	193	134	144	210	260	363	363	344	364	346	346	191	197	173	177	210	220	154	154
US16SS-011	Middle	279	299	124	152	143	163	250	250	154	158	299	363	224	244	246	254	140	140	217	217	118	118	90	98	200	208	109	115	193	197	134	142	240	260	359	363	344	352	346	346	197	197	173	177	220	222	156	156
US16SS-012	Middle	275	283	124	144	131	163	262	270	122	150	315	371	236	244	218	250	140	144	213	241	120	120	86	102	188	220	123	123	181	181	134	146	240	260	363	367	356	380	346	360	197	201	173	173	220	222	154	154
US16SS-013	Middle	275	331	132	148	135	139	238	262	150	182	335	379	232	244	234	234	140	144	217	221	116	118	90	94	168	168	115	121	181	195	148	160	250	260	359	367	322	392	346	346	193	197	173	173	220	220	154	156
US16SS-014	Middle	255	323	128	132	143	147	242	250	142	170	323	363	224	244	234	254	140	144	197	221	118	120	102	118	204	256	115	115	187	191	142	148	260	290	359	360	364	368	346	360	193	197	173	173	222	222	154	154
US16SS-015	Middle	287	291	124	148	131	147	238	270	142	190	323	355	236	244	206	238	140	140	213	217	118	118	86	94	168	224	103	115	191	195	146	146	230	260	363	363	332	368	346	346	191	195	173	173	212	220	156	156
US16SS-016	Middle	275	307	152	156	127	131	246	262	130	162	315	347	236	236	222	226	140	144	217	217	116	120	90	90	176	200	115	121	181	193	136	146	260	290	360	360	324	344	346	346	191	193	173	173	210	220	156	160
US16SS-017	Middle	295	303	148	148	131	163	238	238	162	170	327	375	224	232	206	234	140	144	213	217	118	120	110	130	168	200	115	121	187	191	146	160	250	260	0	0	356	364	346	346	191	193	173	173	210	220	0	0
US16SS-018	Middle	279	315	132	152	171	195	238	238	174	194	311	315	244	248	234	242	140	140	213	217	118	118	90	90	184	192	115	115	187	199	146	146	210	290	359	365	340	372	346	360	193	197	173	173	222	222	156	170
US16SS-002	Middle	275	275	152	152	143	163	238	262	122	158	319	331	244	252	218	238	140	140	203	217	0	0	0	0	176	188	115	115	181	181	142	146	240	250	359	367	326	356	346	346	191	201	173	173	220	222	154	154
US16SS-003	Middle	287	299	124	148	127	131	246	258	150	170	347	371	248	252	222	258	140	140	213	233	118	118	0	0	168	200	115	115	181	195	118	144	210	360	359	363	322	340	346	360	191	191	173	175	220	222	156	156
US16SS-004	Middle	259	323	124	128	131	147	250	270	142	170	323	363	236	244	222	234	140	140	221	221	118	118	98	118	188	200	103	115	187	195	144	164	230	260	359	359	322	368	346	346	191	197	173	173	222	222	154	156
US16SS-005	Middle	311	323	136	164	143	143	238	258	134	190	339	363	232	249	234	234	140	144	217	221	118	118	90	102	228	256	115	115	187	197	142	146	230	260	359	363	368	368	346	346	195	197	173	173	222	222	154	154
US16SS-006	Middle	295	303	124	124	135	147	238	238	126	158	339	399	244	244	234	238	140	144	217	233	0	0	0	0	168	216	115	121	0	0	118	148	210	210	359	359	328	352	348	360	197	197	173	173	222	222	152	154
US16SS-007	Middle	259	307	132	132	147	147	238	258	154	166	327	347	224	236	234	234	140	144	213	217	118	122	90	106	196	200	107	117	189	195	142	146	230	260	359	363	336	368	346	362	191	195	173	173	210	222	156	156
US16SS-008	Middle	259	291	152	168	143	147	250	250	154	154	347	351	224	244	214	234	144	144	209	229	0	0	0	0	172	240	107	117	0	0	140	142	230	260	359	365	348	360	346	364	191	197	173	173	220	222	158	172
US16SS-009	Middle	295	295	148	148	127	131	238	254	154	182	351	363	232	232	226	242	140	144	217	217	116	118	86	86	200	208	115	121	191	197	140	142	230	280	0	0	336	340	346	352	0	0	173	173	212	222	0	0
US18SS-001	Middle	275	287	148	152	127	183	238	238	154	186	331	343	216	252	226	258	140	140	233	233	118	120	0	0	176	264	103	115	181	181	144	150	260	260	359	367	360	364	346	346	193	197	173	173	222	222	156	156
US18SS-002	Middle	283	291	132	148	143	163	258	262	170	186	335	363	224	236	242	254	140	144	229	229	118	122	90	102	192	228	109	115	195	197	142	144	260	290	359	367	0	0	0	0	191	195	0	0	0	0	154	160
US18SS-003	Middle	291	299	140	152	131	135	226	242	138	178	343	351	232	236	234	246	140	144	213	221	116	118	90	90	172	244	103	115	0	0	142	146	240	290	359	363	336	372	346	360	191	197	173	173	210	216	154	172
US18SS-004	Middle	291	331	124	152	127	143	250	258	134	182	343	367	236	244	218	238	140	140	217	229	112	116	94	102	168	180	115	121	0	0	140	160	240	260	359	359	332	340	346	346	193	195	175	175	222	226	152	156
US18SS-005	Middle	295	331	0	0	135	167	238	270	158	174	343	355	224	244	234	242	140	146	229	229	118	118	90	98	168	168	115	115	181	195	146	160	240	260	359	363	336	364	346	346	191	197	173	173	210	210	156	156
US18SS-006	Middle	295	299	148	152	163	163	250	250	178	202	327	351	244	252	206	234	140	140	217	229	118	120	102	102	184	204	115	123	191	195	118	160	260	260	359	367	352	364	346	346	193	197	173	173	220	222	154	154
US18SS-007	Middle	259	315	132	164	131	163	242	258	142	178	319	351	224	224	218	234	140	140	213	217	118	120	90	110	168	196	115	115	181	191	146	148	290	290	363	365	340	356	346	360	193	193	173	173	210	220	156	160
US18SS-008	Middle	279	311	124	132	127	151	242	250	174	178	335	343	236	236	218	238	140	140	213	229	118	120	90	90	192	208	103	103	195	197	144	160	250	250	363	367	316	320	346	346	197	197	173	173	210	222	154	174
US18SS-009	Middle	295	307	148	148	163	167	238	238	186	198	331	379	224	236	234	254	140	144	217	233	118	122	90	102	168	228	103	121	0	0	142	146	260	290	363	367	328	332	0	0	191	191	173	173	212	216	158	160
US18SS-010	Middle	311	339	124	132	123	127	238	250	174	186	347	367	224	248	242	242	140	140	217	217	112	118	94	94	188	200	121	121	187	191	118	148	290	360	359	363	320	320	0	0	197	197	0	0	0	0	154	156
US18SS-012	Middle	275	303	0	0	131	143	238	242	134	158	319	343	224	244	230	242	140	140	217	225	118	118	74	82	168	176	115	115	0	0	136	142	0	0	359	359	372	376	344	360	193	197	173	173	210	222	154	160
US18SS-013	Middle	299	307	124	160	127	135	242	250	174	194	335	363	224	224	230	238	140	140	213	221	118	120	0	0	168	200	115	115	0	0	142	148	0	0	363	365	340	356	346	360	191	191	173	173	220	220	156	158
US18SS-014	Middle	291	291	124	132	131	131	238	246	134	142	319	355	224	224	230	234	140	140	209	225	118	120	0	0	180	192	103	103	0	0	134	142	0	0	359	363	332	372	346	360	195	199	173	173	210	222	160	168
US18SS-015	Middle	275	315	128	132	131	143	242	258	134	142	343	387	236	244	230	238	140	144	213	225	118	118	0	0	168	188	103	103	0	0	142	160	0	0	359	363	332	372	346	360	197	197	173	173	210	222	154	160
US18SS-017	Middle	311	311	124	152	131	143	254	258	114	170	319	323	236	244	234	238	140	144	217	229	120	122	0	0	192	216	103	115	0	0	140	144	0	0	359	363	340	372	360	360	191	193	173	175	222	222	152	152
US18SS-018	Middle	307	311	144	152	143	163	238	254	170	186	331	367	224	224	242	254	140	144	229	233	118	122	0	0	188	264	103	109	0	0	142	146	0	0	359	367	332	372	346	352	191	191	173	173	220	222	158	160
US18SS-019	Middle	299	299	132	136	127	135	238	242	146	150	359	387	236	244	202	230	140	144	217	225	118	122	94	94	176	192	103	121	0	0	134	136	210	260	363	363	322	360	346	352	193	197	173	173	222	222	156	156
US18SS-020	Middle	303	323	132	164	123	135	238	238	154	186	343	347	232	244	234	242	140	144	217	229	118	118	74	82	192	200	103	115	0	0	146	148	0	0	359	363	336	364	346	346	193	197	173	173	212	220	154	156
US18SS-021	Middle	287	315	144	148	127	135	246	270	186	198	347	367	224	248	242	258	140	140	217	233	118	120	82	82	188	208	115	115	0	0	150	154	290	290	359	367	372	372	346	346	191	197	173	173	212	218	156	156
US18SS-022	Middle	283	283	144	152	123	127	238	238	154	206	335	363	224	232	234	238	140	144	217	221	116	118	0	0	172	176	103	109	0	0	148	160	0	0	363	363	372	376	346	352	191	195	173	173	220	226	156	166
US18SS-023	Middle	263	303	132	136	147	187	238	262	134	162	323	343	224	248	230	234	140	144	229	229	116	120	82	98	184	188	107	121	0	0	146	146	230	260	363	363	336	336	346	346	195	195	173	173	222	222	158	168
US18SS-024	Middle	311	331	124	148	135	167	238	250	154	166	347	367	236	249	218	222	140	140	221	229	112	116	74	94	168	172	115	115	0	0	146	160	250	260	359	359	372	376	346	346	195	197	173	175	210	220	156	156
US18SS-025	Middle	259	303	128	148	127	131	238	246	134	174	319	347	224	244	234	234	140	144	213	217	118	120	74	82	180	196	107	115	0	0	118	142	230	230	359	359	338	356	360	362	195	197	173	173	222	222	154	156
US18SS-026	Middle	283	307	132	148	143	143	238	262	118	154	331	367	224	224	242	254	144	144	217	233	118	122	90	126	188	192	103	109	0	0	136	146	260	290	359	367	332	372	346	346	191	195	173	173	220	222	158	160
US18SS-027	Middle	263	291	132	164	123	127	238	254	170	178	339	351	224	236	234	234	140	140	217	221	120	122	0	0	168	168	103	115	0	0	146	148	260	260	359	365	322	344	344	360	191	195	173	173	220	226	156	156
US18SS-028	Middle	283	307	132	144	143	163	258	262	118	170	335	363	224	236	214	254	144	144	217	229	116	118	0	0	188	264	103	103	0	0	142	144	260	260	365	367	324	372	346	360	191	191	173	173	216	222	158	166
US18SS-029	Middle	271	343	148	152	123	127	238	238	114	198	335	335	224	224	234	234	140	140	217	221	118	118	0	0	172	208	0	0	0	0	138	140	0	0	359	359	326	336	346	360	191	197	173	173	212	222	156	156
US18SS-030	Middle	259	307	132	132	131	143	242	282	162	178	339	343	224	224	218	238	140	144	213	225	118	118	0	0	196	248	115	121	0	0	148	148	0	0	363	365	340	364	344	360	193	193	173	175	210	220	156	160
US18SS-031	Middle	271	275	148	152	143	163	0	0	138	182	0	0	224	224	234	258	144	146	217	217	118	120	0	0	188	220	0	0	0	0	140	142	0	0	359	359	336	340	346	346	197	197	173	173	220	220	154	156
US18SS-032	Middle	295	307	148	148	127	163	258	258	118	146	331	331	224	236	234	254	140	144	225	229	116	120	0	0	172	188	0	0	0	0	118	142	0	0	359	367	324	324	346	346	191	197	173	173	220	222	156	166
US18SS-033	Middle	311	343	148	164	127	131	238	254	142	158	311	335	224	249	226	234	140	140	217	217	118	120	0	0	168	228	115	121	0	0	142	144	0	0	359	365	344	352	346	352	195	197	173	173	222	226	154	156
US18SS-034	Middle	259	287	164	164	131	139	238	238	134	134	343	351	236	249	234	238	140	144	217	225	116	116	0	0	168	220	115	121	181	181	136	160	210	280	359	365	332	364	346	346	193	193	173	173	220	220	152	154
US18SS-075	Middle	295	319	132	132	127	135	238	238	134	182	0	0	224	232	234	254	140	144	217	229	116	118	0	0	168	264	0	0	0	0	142	154	0	0	365	367	348	368	346	346	191	191	173	173	220	222	152	156
US18SS-077	Middle	259	311	132	168	127	127	238	282	166	190	347	351	224	236	230	234	140	144	217	221	112	116	0	0	172	184	115	121	0	0	160	160	0	0	363	365	344	376	346	346	191	195	173	173	212	226	156	156
US18SS-078	Middle	299	311	136	148	143	183	250	258	190	190	331	343	224	244	230	238	140	144	213	221	118	118	0	0	200	204	103	121	169	169	118	142	0	0	359	363	360	376	346	352	191	197	173	175	220	222	154	156
US18SS-079	Middle	275	275	124	148	167	167	242	242	198	198	315	323	224	236	218	242	140	140	217	217	118	118	0	0	168	168	115	123	0	0	146	146	0	0	360	363	332	372	346	346	191	193	173	173	220	222	154	154
US18SS-080	Middle	259	295	148	152	127	131	246	258	138	162	315	363	224	232	238	250	140	144	201	229	116	118	0	0	188	200	0	0	0	0	0	0	0	0	363	367	336	356	346	360	195	197	173	173	210	222	158	172
US18SS-081	Middle	295	331	148	148	127	167	242	242	178	190	315	319	224	236	238	238	140	144	209	217	118	120	0	0	200	208	115	121	189	195	118	142	230	260	359	363	372	372	346	346	191	193	173	175	212	226	154	156
US18SS-083	Middle	279	307	132	148	143	183	246	258	182	186	315	319	224	244	218	242	140	144	227	229	118	120	0	0	196	204	115	121	0	0	134	142	0	0	359	367	336	356	346	346	191	191	173	173	220	222	154	156
US18SS-084	Middle	291	299	124	152	143	159	238	254	158	186	319	323	240	244	234	234	140	140	213	249	116	118	0	0	200	224	103	115	0	0	134	144	0	0	359	365	328	360	346	346	193	197	173	173	222	222	154	156
US18SS-085	Middle	287	295	128	148	127	131	242	250	154	182	331	347	224	244	238	246	140	140	229	233	116	118	0	0	192	228	107	115	0	0	142	160	0	0	359	363	364	372	346	346	195	197	173	173	222	222	152	172
US18SS-086	Middle	275	315	124	148	135	135	238	246	154	186	335	343	224	248	222	234	140	140	227	237	118	118	0	0	168	188	115	121	0	0	142	148	0	0	359	365	340	364	346	346	197	197	173	173	212	220	156	156
US18SS-087	Middle	287	295	132	148	131	139	258	270	122	158	343	343	224	244	234	250	140	140	213	217	116	120	0	0	184	196	115	115	0	0	142	144	0	0	359	367	324	364	346	360	191	199	173	173	220	222	156	156
US18SS-088	Middle	275	315	124	148	131	163	254	258	162	166	355	383	232	236	234	242	140	140	227	233	118	120	0	0	172	188	115	121	0	0	146	160	0	0	359	367	320	364	346	360	191	197	173	173	210	222	154	156
US18SS-089	Middle	275	315	148	148	131	163	262	270	186	186	307	335	236	244	218	226	140	144	209	237	118	118	0	0	200	208	107	115	0	0	144	146	0	0	359	359	356	388	346	352	191	197	173	173	212	220	154	156
US18SS-090	Middle	279	295	152	164	147	147	242	246	122	130	339	359	232	248	238	238	140	140	217	217	116	120	0	0	176	200	103	115	0	0	140	160	0	0	363	363	336	356	346	348	191	191	173	173	210	222	154	156
US18SS-091	Middle	0	0	132	156	131	147	238	238	134	134	0	0	224	236	206	254	140	146	217	229	118	120	0	0	192	208	0	0	0	0	0	0	0	0	0	0	340	348	346	346	191	197	173	173	222	222	158	168
US18SS-092	Middle	0	0	124	156	131	143	266	274	166	178	0	0	224	224	0	0	140	144	217	217	116	120	0	0	168	176	121	121	0	0	148	148	0	0	359	359	324	364	346	352	191	193	173	173	220	226	154	156
US18SS-093	Middle	0	0	128	132	147	171	254	258	134	150	0	0	232	252	226	234	140	144	209	217	0	0	0	0	168	196	103	115	0	0	146	148	0	0	359	359	322	372	346	360	197	197	173	175	210	220	152	154
US18SS-095	Middle	291	319	124	132	131	143	238	242	118	170	315	363	224	232	230	238	140	140	217	229	116	118	0	0	176	176	109	115	0	0	140	144	0	0	359	363	336	372	346	360	191	191	173	173	220	222	156	158
US18SS-096	Middle	283	307	132	148	135	135	238	250	154	162	343	343	224	232	250	250	140	140	217	227	118	118	0	0	168	188	115	115	0	0	142	160	0	0	359	363	348	364	346	346	191	197	173	173	220	222	156	170
US18SS-097	Middle	283	291	124	132	123	163	242	270	174	186	347	355	224	244	202	230	140	140	233	233	118	122	0	0	172	200	115	123	0	0	118	134	0	0	359	367	364	372	346	352	191	197	173	173	220	222	154	156
US18SS-098	Middle	299	307	148	148	123	143	246	258	158	186	347	359	224	224	238	238	140	140	213	227	116	116	0	0	196	204	0	0	0	0	142	144	0	0	359	363	364	364	346	346	191	197	173	175	212	222	154	170
US18SS-099	Middle	267	295	164	164	127	147	238	262	182	186	371	371	224	249	230	250	140	140	217	237	118	122	0	0	180	224	0	0	0	0	144	154	0	0	359	359	340	360	352	352	191	193	173	173	220	222	154	156
US18SS-101	Middle	275	311	148	148	123	163	258	262	158	186	347	359	224	224	202	238	140	140	213	233	120	120	94	94	176	204	115	121	0	0	144	146	250	260	359	363	364	364	346	346	197	197	173	173	212	222	152	154
US18SS-102	Middle	299	303	132	132	131	135	242	242	154	166	343	383	228	232	234	250	140	144	213	233	116	118	0	0	172	200	103	117	0	0	134	142	0	0	359	363	360	368	346	360	191	191	168	175	220	220	154	156
US18SS-103	Middle	283	295	124	132	135	147	242	242	146	154	307	343	232	252	222	250	140	144	203	213	118	122	0	0	192	200	103	115	0	0	118	142	0	0	359	363	336	360	346	360	191	197	173	173	220	222	156	156
US18SS-106	Middle	275	311	152	152	143	163	238	270	158	190	0	0	244	244	218	226	140	144	217	217	118	118	0	0	176	252	115	115	0	0	0	0	0	0	363	367	326	336	346	346	191	191	173	173	222	222	154	156
US18SS-108	Middle	275	311	140	148	127	147	242	246	170	202	339	399	0	0	0	0	0	0	0	0	0	0	0	0	176	200	103	121	0	0	134	164	0	0	359	363	340	364	346	346	191	197	173	179	218	220	156	156
US18SS-109	Middle	275	299	152	152	131	167	238	238	166	166	315	347	224	224	206	250	140	140	213	213	112	118	94	130	192	236	103	115	0	0	140	146	260	290	359	359	372	380	346	352	191	197	173	175	220	222	154	154
US18SS-110	Middle	283	311	132	148	135	147	238	242	154	182	347	367	236	236	238	250	140	144	213	229	116	118	0	0	172	200	103	121	0	0	140	142	260	260	365	365	332	336	346	346	191	191	173	173	220	220	156	156
US18SS-111	Middle	275	315	124	132	135	143	246	258	186	186	339	351	224	232	226	242	140	144	213	217	118	120	0	0	172	196	115	123	0	0	138	144	250	250	359	359	348	364	344	352	197	197	173	173	220	220	154	156
US18SS-112	Middle	275	287	124	132	127	163	238	238	150	154	339	367	224	232	238	254	140	144	209	233	116	118	0	0	176	200	103	123	0	0	142	160	260	260	359	363	360	360	346	346	193	195	168	173	222	222	154	172
US18SS-113	Middle	311	331	132	132	187	191	238	258	154	198	343	351	236	236	238	238	144	144	213	227	112	116	0	0	168	180	115	115	0	0	142	160	0	0	359	365	356	364	346	360	191	191	173	173	222	226	154	156
US18SS-114	Middle	279	315	124	132	123	163	238	270	174	174	0	0	224	256	242	246	140	144	221	225	118	120	0	0	176	204	115	115	0	0	0	0	0	0	363	365	336	344	360	360	193	197	175	175	212	220	154	156
US18SS-115	Middle	299	331	152	152	135	163	246	250	158	166	343	363	0	0	0	0	0	0	0	0	0	0	0	0	184	196	115	115	0	0	140	160	0	0	359	367	340	392	346	346	193	197	173	173	220	222	156	156
US18SS-116	Middle	275	275	148	152	131	163	250	258	190	190	319	327	224	224	222	222	140	140	209	217	120	120	118	118	168	200	115	115	0	0	140	160	260	260	359	363	332	372	346	360	191	197	173	173	210	212	154	156
US18SS-117	Middle	271	287	124	168	163	163	250	258	166	202	351	399	224	232	246	254	140	140	213	217	118	118	0	0	200	208	115	121	0	0	134	164	230	260	363	367	332	372	346	346	191	191	173	173	220	222	154	156
US18SS-118	Middle	299	315	144	156	135	143	238	238	130	210	331	363	224	228	206	226	140	144	213	227	118	120	0	0	196	252	121	121	0	0	134	142	0	0	359	363	336	368	346	346	191	197	173	173	210	220	156	158
US18SS-119	Middle	311	315	124	148	143	187	246	258	114	166	355	363	224	232	222	238	140	140	221	229	118	118	0	0	188	192	115	123	0	0	134	136	0	0	359	367	344	344	346	346	191	193	173	173	222	222	154	156
US18SS-120	Middle	275	319	148	164	131	167	238	238	166	170	315	347	224	236	234	234	140	140	201	203	112	120	0	0	172	192	115	115	0	0	140	142	0	0	359	365	332	372	346	346	199	199	173	175	220	222	156	168
US18SS-121	Middle	291	311	132	168	163	163	250	250	142	166	351	351	224	232	254	254	140	140	213	229	118	122	0	0	188	200	115	121	0	0	134	164	0	0	363	367	368	372	346	360	191	197	173	173	220	222	154	154
US18SS-122	Middle	271	295	148	156	143	195	242	258	174	182	359	387	240	244	226	226	140	144	201	213	116	116	0	0	188	192	103	115	0	0	136	162	0	0	359	363	322	364	346	346	191	191	173	173	222	222	160	168
US18SS-123	Middle	275	299	132	132	143	163	246	250	130	146	303	315	0	0	0	0	140	144	209	209	0	0	0	0	164	188	121	121	0	0	148	158	0	0	363	363	322	344	346	360	191	197	173	173	220	222	154	156
US18SS-124	Middle	275	291	124	148	127	131	238	238	142	166	343	351	224	228	226	250	140	144	213	213	118	120	90	98	188	200	115	121	197	197	142	160	260	280	363	367	368	372	346	352	191	191	173	173	220	224	154	156
US18SS-125	Middle	275	315	152	156	127	147	238	246	150	202	315	351	224	244	226	234	140	144	225	227	118	120	0	0	184	196	0	0	0	0	142	148	0	0	359	363	324	372	346	346	197	197	173	173	210	224	156	156
US18SS-126	Middle	295	299	128	152	135	139	238	238	154	174	347	363	236	244	206	226	140	144	213	217	118	118	0	0	196	200	103	107	0	0	146	150	0	0	359	359	324	336	346	360	191	197	173	173	220	222	156	156
US18SS-127	Middle	283	287	132	144	131	143	238	238	154	170	367	371	224	224	226	250	140	140	201	243	118	118	0	0	188	228	103	115	0	0	142	144	0	0	0	0	326	344	346	346	193	193	173	173	212	220	152	156
US18SS-128	Middle	275	315	148	160	127	135	242	246	170	182	343	391	232	244	230	242	140	140	233	233	118	122	0	0	176	204	103	115	0	0	140	158	0	0	359	367	360	392	346	346	197	197	173	179	218	220	154	156
US18SS-130	Middle	291	295	148	148	131	143	246	258	130	142	343	371	224	236	234	238	140	146	217	229	118	120	0	0	200	204	0	0	0	0	118	146	0	0	359	359	364	368	346	360	191	191	173	173	210	222	156	158
US18SS-131	Middle	271	299	144	164	143	147	238	246	190	202	363	399	0	0	0	0	0	0	0	0	0	0	0	0	172	252	103	115	0	0	134	160	260	260	359	363	332	352	346	346	191	191	173	173	222	222	154	158
US18SS-132	Middle	275	275	148	148	131	163	242	258	138	190	319	343	224	224	218	242	140	140	209	217	118	120	90	130	168	168	115	115	0	0	140	160	210	290	359	363	368	372	346	360	191	197	173	173	210	222	154	156
US18SS-133	Middle	271	299	132	164	135	143	258	270	130	190	315	323	224	232	206	234	140	140	217	233	118	120	78	118	188	200	123	123	0	0	134	164	0	0	363	365	356	364	346	360	191	197	173	173	220	220	156	158
US18SS-134	Middle	287	311	124	124	147	163	238	238	166	174	327	351	224	252	242	254	140	144	217	233	118	118	0	0	200	204	115	121	0	0	160	160	260	260	359	363	372	376	346	346	197	197	173	173	220	222	154	156
US18SS-135	Middle	299	307	148	148	163	167	238	246	182	182	319	363	232	244	238	246	140	144	213	217	118	118	0	0	244	252	115	121	0	0	146	146	0	0	359	363	360	364	346	346	191	201	168	173	220	222	154	156
US18SS-136	Middle	311	331	132	152	187	191	238	258	154	174	351	383	236	252	238	246	140	144	213	229	112	116	0	0	168	180	115	123	0	0	142	160	260	260	359	365	332	364	346	346	191	191	173	173	222	222	156	156
US18SS-137	Middle	259	287	152	168	143	147	238	238	130	174	315	343	236	252	230	246	140	144	217	225	118	118	90	90	176	200	107	121	0	0	146	148	250	260	359	367	324	332	346	346	191	193	173	173	212	220	154	156
US18SS-138	Middle	287	303	128	164	131	135	234	238	122	190	315	343	236	249	230	234	140	140	217	217	118	120	0	0	192	224	0	0	0	0	134	160	0	0	363	363	332	372	346	360	191	191	173	173	220	222	156	172
US18SS-139	Middle	259	287	124	152	127	163	254	266	118	150	327	347	0	0	0	0	0	0	0	0	0	0	0	0	172	192	121	121	0	0	136	142	0	0	363	367	336	368	346	346	191	195	173	173	210	222	154	154
US18SS-140	Middle	279	303	148	148	171	175	238	246	158	190	363	383	236	244	234	254	140	140	209	227	118	118	0	0	188	196	103	121	197	217	134	158	360	360	359	359	356	368	352	360	197	197	173	173	220	222	156	156
US18SS-141	Middle	0	0	128	132	127	127	0	0	126	190	0	0	232	248	0	0	140	140	217	237	118	118	94	94	196	204	103	115	0	0	134	146	0	0	0	0	364	372	346	352	197	197	173	173	212	212	154	156
ETN13FT-V10	Outer	267	291	152	152	159	163	238	238	126	182	283	347	244	252	230	250	140	144	203	229	118	118	90	90	172	192	103	121	187	187	118	146	260	300	367	367	326	360	346	360	193	193	173	173	222	222	154	154
ETN13FT-V100	Outer	295	323	132	148	143	159	238	242	162	170	347	355	236	249	210	246	140	140	225	225	118	118	90	98	176	248	103	115	183	195	134	148	260	260	363	367	340	356	346	346	191	197	173	173	212	220	156	160
ETN13FT-V101	Outer	283	291	132	152	123	167	238	242	134	174	355	371	224	224	234	238	140	144	213	225	118	118	90	114	168	188	107	107	181	181	134	148	260	260	359	363	324	364	346	346	191	191	173	175	222	222	154	156
ETN13FT-V102	Outer	283	287	148	148	131	163	238	270	162	210	355	371	224	232	218	242	144	144	209	233	112	118	86	90	168	192	107	115	187	193	146	148	210	260	363	367	322	360	346	360	191	197	173	173	212	222	156	156
ETN13FT-V103	Outer	299	335	132	148	127	167	250	254	162	218	319	319	224	232	226	234	140	144	237	237	118	122	90	98	188	192	103	115	179	197	140	146	210	240	359	363	348	368	346	346	197	197	173	173	210	226	172	172
ETN13FT-V104	Outer	287	307	124	152	131	135	238	270	174	190	355	355	224	248	230	230	140	146	213	233	116	118	90	90	168	168	121	121	187	197	142	142	260	260	363	367	316	326	346	360	191	195	173	173	222	222	156	168
ETN13FT-V105	Outer	275	311	124	152	127	163	238	250	138	158	327	343	224	244	230	242	140	144	217	233	118	120	90	98	184	188	103	115	193	197	142	148	240	260	359	367	352	360	346	346	191	197	173	173	220	222	156	156
ETN13FT-V106	Outer	291	295	132	148	135	163	238	238	150	190	331	359	224	244	234	246	140	146	225	233	118	118	94	94	192	260	103	121	181	195	140	142	290	360	359	367	348	364	352	360	191	197	173	173	212	220	154	154
ETN13FT-V107	Outer	255	303	124	148	131	147	238	258	182	198	343	363	224	244	234	238	140	144	225	225	118	118	90	90	172	204	121	123	181	187	118	118	230	260	359	363	352	352	346	352	191	197	173	173	220	222	156	158
ETN13FT-V108	Outer	279	315	128	136	131	135	242	258	170	174	343	347	232	232	230	230	140	140	203	209	118	120	90	118	196	200	103	119	191	195	146	160	260	280	365	367	330	364	346	346	193	197	173	173	222	222	156	168
ETN13FT-V109	Outer	243	339	124	132	127	135	238	266	162	198	343	347	236	244	226	234	140	144	209	217	112	120	90	98	196	228	115	121	181	203	134	146	250	260	359	363	360	364	360	360	193	197	173	173	222	222	156	158
ETN13FT-V11	Outer	299	327	148	160	131	191	238	266	150	170	359	379	224	244	234	238	140	140	213	233	116	118	94	118	168	172	115	121	193	197	134	160	230	260	359	365	334	372	346	346	195	197	173	173	220	222	156	170
ETN13FT-V110	Outer	279	311	124	136	127	139	242	250	150	194	319	371	224	244	222	238	140	144	213	217	118	118	90	102	168	176	115	121	181	181	146	164	250	260	363	363	364	372	346	360	197	197	173	173	220	222	154	156
ETN13FT-V111	Outer	279	335	124	124	127	131	238	238	170	198	331	359	232	244	234	242	140	144	197	249	116	118	90	94	196	204	103	115	193	197	134	160	230	280	359	363	320	336	346	352	191	193	173	173	220	222	154	154
ETN13FT-V112	Outer	271	299	132	152	131	163	266	266	166	198	331	371	236	244	230	238	144	146	213	235	118	120	98	122	196	260	115	123	187	217	118	164	250	260	359	363	332	336	346	346	191	197	173	175	220	222	156	156
ETN13FT-V113	Outer	303	343	124	152	143	167	238	266	186	186	343	363	224	248	230	234	144	144	217	229	116	122	90	110	168	196	107	115	191	195	140	146	210	240	359	367	356	376	360	360	191	201	173	175	220	222	158	168
ETN13FT-V114	Outer	295	331	124	148	131	183	238	242	130	198	343	355	224	248	210	250	140	144	201	229	120	122	90	90	188	208	115	123	195	197	146	164	230	230	365	367	328	360	346	360	195	195	173	173	212	220	156	158
ETN13FT-V115	Outer	283	299	136	148	127	139	242	282	182	190	351	363	244	244	226	246	140	140	217	221	118	118	90	98	196	200	115	121	189	197	144	146	250	290	365	367	340	348	360	360	197	197	173	173	220	222	154	160
ETN13FT-V116	Outer	279	307	124	124	131	139	246	254	182	226	343	347	224	232	246	258	140	144	221	229	118	118	94	98	192	228	109	115	195	197	146	148	250	290	363	365	356	380	346	346	191	197	173	173	220	222	156	156
ETN13FT-V117	Outer	287	303	124	144	127	135	238	238	170	178	355	379	224	248	226	242	140	140	221	225	116	118	90	98	168	204	103	121	181	211	146	148	240	260	363	365	332	368	346	346	197	197	173	173	222	222	154	156
ETN13FT-V118	Outer	275	315	152	152	139	163	238	242	122	166	351	351	232	244	234	238	140	144	203	217	120	120	94	118	168	220	103	115	195	217	134	142	260	290	0	0	324	340	346	346	191	197	173	173	220	220	156	172
ETN13FT-V119	Outer	287	307	124	144	131	183	238	246	158	170	287	339	228	244	218	234	140	144	221	229	118	118	90	94	172	200	121	123	187	195	118	134	260	290	363	363	360	368	346	346	197	197	173	173	212	222	154	160
ETN13FT-V12	Outer	291	299	124	124	135	143	258	274	174	194	307	371	240	252	230	234	140	140	203	225	118	122	70	90	188	192	103	115	187	187	140	144	230	260	359	367	348	360	346	346	197	197	173	173	220	222	154	168
ETN13FT-V120	Outer	267	331	124	128	147	167	238	250	154	198	351	355	224	232	234	246	140	144	203	229	118	120	90	98	192	196	103	115	187	195	140	148	250	260	359	363	368	372	346	352	193	197	173	173	222	226	154	154
ETN13FT-V121	Outer	279	291	124	132	171	171	246	258	110	186	323	371	232	249	230	250	140	140	217	221	118	118	94	98	168	188	103	121	187	187	142	142	260	260	359	367	324	356	346	352	197	201	173	173	220	222	154	154
ETN13FT-V122	Outer	303	323	124	152	171	183	238	238	154	174	347	367	232	244	222	234	140	140	221	221	116	118	86	90	192	248	109	115	181	189	136	144	260	290	359	359	332	368	346	360	191	197	173	173	222	222	156	156
ETN13FT-V123	Outer	311	335	136	152	147	167	250	274	174	202	279	367	232	236	238	246	140	142	217	217	118	120	90	126	188	200	121	121	191	193	134	146	250	280	365	367	340	360	346	346	193	199	173	173	210	222	154	168
ETN13FT-V124	Outer	299	311	124	124	131	131	250	266	126	178	343	355	244	248	226	230	140	144	229	229	118	122	90	98	176	188	115	121	189	191	142	146	240	250	363	367	324	330	346	346	193	193	173	173	222	222	154	154
ETN13FT-V125	Outer	287	291	132	148	139	167	238	238	114	182	319	343	228	252	214	246	140	144	225	237	116	118	66	90	176	196	103	115	197	217	142	146	250	260	359	359	340	368	346	360	191	197	173	173	222	222	156	156
ETN13FT-V126	Outer	255	339	124	148	127	143	238	254	150	198	315	343	236	244	222	238	140	144	217	217	118	122	94	94	172	188	115	121	181	197	142	146	240	260	359	363	340	372	346	346	191	195	175	177	220	226	166	168
ETN13FT-V127	Outer	307	315	128	148	127	143	250	270	154	182	343	347	236	244	238	246	140	140	217	241	116	122	90	102	172	208	115	115	191	195	140	144	260	260	363	367	356	360	346	356	191	191	173	173	220	222	154	168
ETN13FT-V129	Outer	287	315	148	164	127	183	238	270	182	186	327	343	244	249	246	254	140	140	229	237	118	120	90	134	260	260	103	121	181	187	142	146	260	260	363	363	348	356	346	352	195	197	173	173	220	222	154	168
ETN13FT-V13	Outer	267	311	152	164	131	131	262	270	146	162	323	351	244	244	230	238	140	144	201	217	116	118	90	90	168	200	115	123	189	195	118	142	260	290	359	365	352	366	346	346	193	201	173	173	220	222	156	156
ETN13FT-V130	Outer	279	339	132	148	139	159	266	282	178	206	331	363	244	244	226	246	144	146	209	217	118	118	90	98	200	260	121	123	189	217	146	164	260	260	359	365	332	340	346	346	197	197	173	175	222	222	154	160
ETN13FT-V131	Outer	283	291	124	152	131	131	238	250	174	186	343	355	224	236	234	238	144	144	217	229	118	118	90	98	168	196	103	115	187	191	140	146	210	260	363	367	336	356	346	360	191	201	173	173	222	222	154	168
ETN13FT-V132	Outer	279	283	148	152	127	183	238	282	158	218	347	371	236	236	230	234	144	144	213	213	118	120	90	98	172	196	103	123	195	197	140	160	230	260	359	365	324	332	346	352	197	197	173	173	210	222	156	156
ETN13FT-V133	Outer	279	303	124	152	127	143	242	242	114	186	339	371	224	249	234	234	140	140	197	233	116	118	90	94	188	192	115	121	195	195	142	148	260	290	359	363	336	360	346	346	197	197	173	173	220	222	156	160
ETN13FT-V134	Outer	267	291	148	152	159	183	238	270	174	182	283	363	224	252	230	250	140	144	221	221	118	118	90	90	168	188	115	121	187	191	118	146	210	300	365	367	360	376	346	360	191	191	173	173	222	222	150	156
ETN13FT-V135	Outer	259	275	152	152	123	135	238	258	174	186	367	391	212	236	226	238	140	146	213	237	118	118	90	102	172	188	103	115	197	197	140	146	210	260	363	363	316	360	346	352	191	197	173	179	220	220	154	156
ETN13FT-V136	Outer	275	295	124	124	127	163	242	258	142	170	311	319	236	244	238	242	144	144	213	217	120	122	90	90	192	196	103	123	195	217	136	142	230	290	359	365	340	356	346	360	191	197	173	173	220	220	156	156
ETN13FT-V137	Outer	295	315	148	152	163	171	238	246	186	194	355	359	224	240	234	250	140	144	217	233	118	120	90	98	168	192	109	115	181	191	134	136	260	360	359	359	324	364	346	346	191	197	173	173	210	222	156	160
ETN13FT-V138	Outer	283	295	148	152	143	159	238	246	130	198	351	359	224	244	226	238	144	144	213	225	118	120	98	114	184	260	103	115	193	197	134	160	280	290	359	365	322	360	346	346	191	197	173	173	220	222	156	168
ETN13FT-V139	Outer	287	315	124	132	143	183	242	250	186	202	307	323	244	248	214	250	140	144	217	229	118	122	90	130	172	196	115	115	181	195	118	146	240	260	365	365	320	352	346	360	191	191	173	173	220	222	156	172
ETN13FT-V14	Outer	279	287	136	148	139	159	238	266	182	206	363	367	244	248	234	258	140	140	217	217	118	122	94	134	168	196	107	121	191	191	146	146	240	260	367	367	376	376	346	346	193	193	173	175	220	222	154	156
ETN13FT-V140	Outer	275	279	128	152	143	143	238	246	122	174	351	351	236	252	210	230	140	146	221	229	118	118	90	130	168	168	121	123	193	195	146	146	250	260	367	367	344	364	346	360	193	197	173	173	220	222	156	170
ETN13FT-V141	Outer	279	299	124	132	143	143	242	258	174	174	335	339	224	249	238	250	140	140	217	229	118	118	90	90	176	188	115	115	187	191	134	136	250	290	359	367	320	324	346	346	197	197	173	173	222	222	156	160
ETN13FT-V142	Outer	283	303	124	148	131	171	238	242	122	186	339	371	232	244	222	250	144	144	217	233	118	118	90	90	172	188	121	121	187	197	148	148	210	210	0	0	344	352	346	346	191	197	168	175	220	222	150	156
ETN13FT-V143	Outer	295	315	124	124	135	135	242	254	186	210	319	359	232	232	230	242	140	144	209	217	120	122	86	94	188	192	103	115	181	193	148	160	260	260	363	367	352	372	346	346	191	191	173	173	222	222	156	158
ETN13FT-V144	Outer	283	303	124	136	183	183	238	250	162	178	323	323	224	244	214	250	140	140	217	217	118	122	90	94	172	172	115	121	195	197	118	140	230	260	357	363	360	360	346	346	197	197	173	175	212	222	152	156
ETN13FT-V145	Outer	283	287	132	148	139	143	238	242	162	162	331	351	224	236	226	234	140	144	217	237	118	122	90	90	192	192	115	123	193	195	142	148	210	240	359	365	360	364	346	352	197	197	173	175	222	222	158	172
ETN13FT-V146	Outer	275	283	128	152	143	167	262	270	122	186	311	311	224	224	230	254	140	140	217	221	118	118	90	94	176	196	103	115	181	195	118	164	230	260	363	363	328	344	346	346	197	197	173	173	212	222	154	168
ETN13FT-V147	Outer	299	303	148	152	143	167	238	254	170	198	355	375	244	252	222	246	140	144	217	221	118	124	90	90	184	192	115	121	181	187	140	146	210	360	359	363	328	364	346	360	191	197	173	173	210	222	154	172
ETN13FT-V148	Outer	291	319	124	152	139	159	246	250	174	190	319	359	224	249	242	254	140	144	203	217	118	118	90	130	168	196	103	115	191	193	118	142	260	290	359	363	348	360	346	360	197	197	173	173	210	210	152	156
ETN13FT-V149	Outer	259	315	124	124	167	167	254	270	166	170	347	351	224	236	222	234	140	140	217	229	118	118	90	114	172	184	115	115	181	193	134	146	260	260	359	367	344	364	346	360	191	193	173	173	222	222	154	156
ETN13FT-V15	Outer	283	359	124	152	127	131	238	266	170	198	355	395	224	236	202	246	140	144	213	217	118	118	90	90	180	192	103	103	191	191	142	146	250	260	363	367	356	360	346	360	191	197	173	173	216	222	154	156
ETN13FT-V150	Outer	315	359	128	132	135	191	238	250	170	178	315	355	236	244	210	234	140	140	217	217	118	120	90	110	180	192	103	107	181	187	146	146	250	260	359	359	316	356	360	360	193	197	173	173	222	222	156	170
ETN13FT-V151	Outer	283	331	124	140	139	143	238	246	146	182	315	335	232	236	222	234	140	140	217	217	118	118	90	90	172	200	115	123	195	197	118	134	260	290	363	367	348	356	346	346	191	197	168	177	210	222	156	156
ETN13FT-V152	Outer	271	279	132	148	155	163	250	266	150	170	339	351	240	244	234	246	140	144	213	237	120	120	90	110	176	184	115	115	193	197	142	146	250	290	359	367	352	360	346	346	197	197	173	173	220	222	156	168
ETN13FT-V16	Outer	283	299	148	152	139	143	258	258	154	170	343	367	236	244	246	250	144	146	217	233	118	120	90	90	176	192	103	123	181	193	134	148	210	210	359	359	328	364	352	360	191	197	173	173	222	226	154	154
ETN13FT-V17	Outer	283	307	152	164	135	159	246	266	162	198	335	363	224	236	222	254	140	140	217	217	118	118	90	102	168	196	103	107	191	193	146	146	250	250	365	367	320	332	346	346	193	197	173	175	212	222	156	158
ETN13FT-V19	Outer	275	283	132	152	131	183	254	266	146	154	355	363	224	224	242	250	140	140	197	221	118	118	90	94	168	224	103	103	181	187	134	146	260	300	363	367	332	332	346	352	197	197	173	173	222	222	154	156
ETN13FT-V2	Outer	327	331	124	136	123	135	238	246	166	170	347	351	216	244	218	230	140	140	233	233	116	118	90	118	176	192	121	121	187	197	160	160	250	260	0	0	368	368	346	346	193	197	173	173	210	222	154	156
ETN13FT-V20	Outer	287	315	124	136	131	135	238	270	162	170	343	355	224	248	226	242	140	146	213	217	118	118	94	114	192	228	107	121	181	187	146	146	260	290	359	363	364	368	346	346	191	193	173	173	220	222	154	154
ETN13FT-V21	Outer	311	331	124	148	143	195	238	246	126	170	319	339	232	244	230	234	140	144	217	221	118	124	90	90	168	184	121	121	181	187	144	146	210	210	359	365	328	336	346	360	197	197	173	173	212	220	154	156
ETN13FT-V22	Outer	299	311	124	144	135	143	242	258	114	174	319	319	232	236	234	234	140	144	217	217	116	118	90	90	168	176	103	121	191	197	140	144	260	290	359	363	360	360	346	346	193	197	173	173	220	222	156	156
ETN13FT-V23	Outer	263	303	148	152	131	143	266	270	150	162	319	343	244	244	238	242	140	140	217	241	118	118	86	94	168	172	115	117	193	195	144	148	260	260	359	363	332	340	346	346	191	197	173	175	220	222	170	172
ETN13FT-V24	Outer	267	323	124	152	127	131	238	270	150	222	315	351	232	244	234	242	140	144	197	217	118	120	90	134	196	200	121	121	191	197	140	148	260	260	359	363	348	368	346	348	191	193	173	173	222	222	152	156
ETN13FT-V25	Outer	279	287	144	152	127	131	238	254	122	150	359	367	232	236	230	234	140	144	213	229	118	120	90	94	168	216	115	121	189	189	134	160	260	290	359	367	348	368	346	360	191	197	173	175	220	222	156	156
ETN13FT-V26	Outer	287	315	136	152	131	159	250	266	190	218	367	395	232	248	254	254	140	140	217	233	112	118	90	114	188	224	115	115	193	197	134	140	210	260	367	367	328	344	346	346	193	197	173	173	220	226	154	168
ETN13FT-V27	Outer	299	339	124	132	127	179	238	266	162	170	339	367	224	232	234	250	140	146	229	241	112	118	90	126	188	236	103	121	191	217	142	144	230	250	359	365	332	340	346	352	193	201	173	173	212	220	154	170
ETN13FT-V28	Outer	303	307	124	128	163	183	250	258	178	206	363	367	244	249	234	246	144	146	213	225	118	120	90	94	192	196	115	115	181	193	118	146	260	290	365	365	360	364	346	346	191	201	173	173	222	222	154	154
ETN13FT-V29	Outer	311	331	132	148	127	143	238	238	170	174	303	367	224	244	218	230	144	144	217	241	112	120	98	126	188	200	103	103	181	191	118	142	230	230	359	359	332	348	346	346	193	201	173	173	212	222	154	160
ETN13FT-V3	Outer	299	323	124	148	131	139	254	270	154	194	327	343	224	240	238	238	140	144	201	213	118	120	90	90	172	184	103	115	193	193	118	148	210	250	363	365	332	360	346	346	197	197	173	173	210	220	154	156
ETN13FT-V30	Outer	243	303	132	148	139	143	238	246	138	182	347	403	236	244	234	246	140	140	221	221	118	118	86	98	184	228	109	115	181	195	118	146	250	260	359	365	356	360	346	346	191	197	173	173	210	222	150	170
ETN13FT-V31	Outer	279	291	132	152	127	159	246	254	162	182	367	387	244	249	210	254	140	140	217	233	118	120	90	98	188	192	103	115	195	197	140	144	210	230	359	363	320	336	346	360	197	197	173	173	220	222	154	156
ETN13FT-V32	Outer	295	303	148	148	139	143	250	254	162	166	331	351	232	244	238	238	144	144	217	237	118	118	90	90	192	196	115	121	195	197	134	142	210	240	363	365	360	364	346	352	191	197	173	173	220	222	156	158
ETN13FT-V33	Outer	259	291	124	152	135	167	242	254	162	166	347	371	232	244	210	238	140	144	217	229	118	122	98	114	168	168	103	115	181	191	134	148	230	260	363	367	372	376	346	346	191	197	173	177	220	222	156	158
ETN13FT-V34	Outer	275	283	132	152	167	167	238	242	166	182	279	359	224	232	210	238	140	146	213	237	118	118	90	94	168	172	115	115	187	197	142	148	260	260	359	359	344	360	346	346	193	197	173	175	222	222	154	170
ETN13FT-V35	Outer	295	355	136	152	135	167	254	266	170	178	311	343	244	244	210	222	140	140	213	217	116	118	98	126	188	200	115	121	193	217	134	146	250	250	359	363	324	360	346	346	191	195	173	173	212	222	150	156
ETN13FT-V36	Outer	279	299	124	136	127	139	238	242	150	190	319	371	224	240	222	238	140	144	217	221	116	118	90	102	168	176	115	121	181	193	144	146	250	260	359	363	364	372	346	360	191	197	173	173	220	222	152	156
ETN13FT-V37	Outer	299	319	124	124	143	163	242	246	194	194	355	359	244	244	254	254	140	140	217	233	118	118	90	94	168	208	115	115	191	195	140	144	290	290	359	359	366	380	352	360	191	197	173	173	220	222	156	156
ETN13FT-V38	Outer	267	311	152	152	135	183	238	246	162	174	351	363	224	236	230	242	140	144	221	253	116	118	90	94	172	188	107	123	191	195	118	148	240	250	359	359	340	344	346	360	195	201	173	173	220	226	154	156
ETN13FT-V39	Outer	295	339	152	152	135	163	254	254	130	178	307	323	236	244	222	234	144	144	229	229	116	120	98	114	188	188	115	115	183	193	134	134	250	250	359	363	356	360	346	346	195	195	173	173	220	222	156	156
ETN13FT-V4	Outer	263	279	132	132	127	131	254	274	162	162	299	351	232	240	242	250	140	144	217	217	118	122	90	98	192	208	103	115	181	197	140	148	260	290	363	365	356	360	346	360	193	197	173	179	220	222	156	172
ETN13FT-V40	Outer	267	299	148	152	135	147	238	266	162	206	343	363	232	244	222	238	140	140	217	233	118	118	90	134	192	200	121	121	181	181	148	160	210	210	363	365	326	368	352	352	197	197	173	177	222	222	156	170
ETN13FT-V41	Outer	291	303	132	152	131	167	238	266	182	206	343	371	240	248	226	230	140	140	213	221	118	122	90	90	188	216	115	115	195	197	144	146	210	240	359	360	316	356	346	352	193	197	173	173	222	226	152	156
ETN13FT-V42	Outer	259	283	124	124	147	183	242	242	162	206	339	347	224	224	222	234	140	140	213	213	112	122	90	90	168	172	115	121	181	195	134	146	240	290	359	367	328	356	346	360	197	197	173	173	220	220	154	156
ETN13FT-V43	Outer	275	287	152	152	143	159	238	270	182	182	359	367	224	248	202	234	140	140	213	221	118	120	98	110	196	200	115	115	181	197	144	146	250	260	367	367	336	380	346	360	197	197	173	173	220	222	156	156
ETN13FT-V44	Outer	307	331	144	152	127	195	238	238	178	186	319	327	236	245	234	250	144	144	213	225	118	120	90	94	172	260	121	121	181	189	140	160	280	290	359	359	336	368	360	360	191	193	173	173	210	220	154	168
ETN13FT-V45	Outer	299	303	124	152	143	187	258	266	178	190	351	367	236	248	206	250	140	140	213	217	118	118	90	90	172	196	115	121	181	191	118	134	250	360	363	367	324	344	346	360	195	197	173	175	212	222	152	156
ETN13FT-V46	Outer	295	331	124	152	127	131	254	258	186	198	335	375	224	236	230	246	140	146	213	217	118	120	98	110	180	192	103	121	197	197	134	140	250	260	363	365	348	372	346	346	197	197	173	175	220	222	154	156
ETN13FT-V47	Outer	283	283	124	164	131	139	250	254	154	178	331	351	224	248	238	242	140	140	213	217	118	120	90	94	188	212	115	115	191	191	136	162	230	300	367	367	376	376	346	346	193	193	173	173	220	222	154	154
ETN13FT-V48	Outer	259	307	124	152	147	187	254	270	162	182	363	395	212	224	238	254	140	144	213	249	112	122	90	90	172	224	115	119	187	193	140	160	250	260	363	367	344	364	352	360	193	193	173	179	210	220	150	156
ETN13FT-V49	Outer	267	299	132	132	143	159	238	262	182	198	331	343	224	232	222	234	140	144	213	229	116	118	86	90	168	192	115	115	187	217	140	146	230	260	359	363	326	356	346	346	193	197	173	173	222	222	150	156
ETN13FT-V5	Outer	299	307	124	156	127	131	238	258	122	154	359	371	224	232	234	238	140	140	217	217	118	118	86	90	176	184	115	115	181	195	142	144	240	290	0	0	328	360	346	346	191	193	168	173	220	220	156	162
ETN13FT-V50	Outer	291	315	136	148	127	135	238	238	162	210	339	351	224	232	234	242	140	144	225	249	118	118	90	90	172	204	103	107	181	181	144	158	240	260	359	363	340	364	346	346	191	191	173	173	222	222	154	156
ETN13FT-V51	Outer	291	295	124	152	167	167	254	258	114	186	335	339	249	249	234	246	140	140	229	233	118	118	106	134	172	188	107	115	181	187	118	118	250	290	359	363	344	368	346	346	191	197	173	173	220	222	156	174
ETN13FT-V52	Outer	279	311	136	152	131	143	238	238	170	186	303	311	232	240	226	250	140	140	217	221	120	122	86	98	168	196	115	121	191	197	146	146	210	230	359	363	368	372	346	352	191	193	173	173	220	222	156	156
ETN13FT-V53	Outer	267	295	124	164	131	139	238	250	162	174	323	355	224	224	242	250	140	140	213	217	118	122	98	118	168	196	107	121	193	199	118	146	230	260	363	363	348	368	346	352	191	197	173	173	222	222	152	154
ETN13FT-V54	Outer	275	299	124	148	123	123	254	258	178	206	299	395	236	244	238	250	140	144	213	229	116	116	90	90	188	192	105	115	181	193	136	142	260	300	359	363	322	344	346	360	191	191	173	173	220	222	154	156
ETN13FT-V55	Outer	267	283	124	164	131	139	246	250	162	178	323	339	224	224	242	242	140	140	213	213	118	122	94	118	192	196	107	121	181	195	118	146	230	260	363	363	360	364	346	352	191	197	173	173	210	222	154	160
ETN13FT-V56	Outer	291	335	132	164	131	159	238	238	142	150	319	355	236	249	238	250	140	140	221	229	118	118	90	90	176	192	115	121	181	197	142	164	240	260	359	365	336	344	346	346	193	197	175	175	220	222	154	174
ETN13FT-V57	Outer	267	295	124	128	143	159	238	266	122	162	363	367	240	248	238	242	140	144	217	217	116	118	90	94	168	200	107	121	191	197	140	146	210	260	359	367	326	376	346	352	191	197	173	175	222	222	154	158
ETN13FT-V58	Outer	275	295	152	152	131	183	238	254	178	190	323	335	224	252	210	250	140	140	217	253	118	120	90	106	168	192	115	123	191	197	118	160	260	260	359	363	368	372	346	360	197	197	173	175	212	220	154	156
ETN13FT-V59	Outer	303	311	132	164	143	159	254	274	190	194	315	331	232	252	246	250	140	140	225	229	116	122	86	90	192	224	115	115	181	187	136	140	250	290	359	367	336	348	346	346	193	197	173	173	222	222	154	156
ETN13FT-V6	Outer	279	335	124	148	159	163	238	242	162	174	355	387	224	240	218	226	140	140	233	237	118	120	90	90	172	212	103	121	187	193	142	148	250	260	363	367	352	372	346	346	195	197	175	175	220	222	156	156
ETN13FT-V60	Outer	267	307	152	164	135	167	250	266	142	174	355	363	216	248	218	226	140	140	217	229	118	120	90	118	204	260	103	107	187	197	140	144	240	240	359	365	336	336	344	346	191	195	175	175	220	222	152	156
ETN13FT-V61	Outer	275	295	132	152	127	167	238	238	150	222	311	375	224	232	238	242	144	144	213	213	120	122	90	90	192	208	103	115	187	197	134	148	290	360	359	359	360	360	346	346	191	191	173	175	220	222	156	168
ETN13FT-V62	Outer	299	335	124	136	135	139	238	246	174	226	343	355	232	232	234	258	140	140	221	233	118	120	90	114	172	228	115	115	181	197	140	146	250	260	363	367	352	356	346	346	195	195	173	173	222	226	150	156
ETN13FT-V63	Outer	275	291	128	152	123	131	238	258	154	186	351	391	236	236	222	250	140	146	213	225	118	118	90	102	168	188	115	115	197	197	140	142	240	260	359	367	360	360	346	346	191	197	173	179	220	220	154	156
ETN13FT-V65	Outer	287	299	132	144	123	139	238	266	182	194	287	347	236	252	230	242	140	144	229	237	120	120	90	110	196	228	115	115	195	197	144	144	230	260	359	363	326	368	346	360	193	197	173	175	220	222	154	168
ETN13FT-V66	Outer	287	299	124	136	143	183	242	250	162	202	319	323	232	249	214	230	140	140	217	229	118	122	90	130	168	236	119	121	195	195	140	146	260	260	359	363	344	352	346	352	191	201	173	175	222	222	156	172
ETN13FT-V67	Outer	319	327	124	148	127	143	242	254	190	194	355	359	240	244	234	250	140	140	229	233	118	118	90	118	168	224	103	115	193	217	136	160	240	290	359	367	324	360	346	346	197	197	173	173	210	220	154	156
ETN13FT-V68	Outer	283	303	132	136	131	167	238	254	162	190	363	375	236	252	226	226	140	140	217	225	118	118	86	90	196	208	121	121	181	187	140	142	240	260	359	365	340	372	346	360	191	197	173	175	220	222	156	158
ETN13FT-V69	Outer	275	303	132	148	131	183	238	238	122	174	331	371	232	244	202	234	140	144	217	237	118	122	90	90	196	216	107	121	179	193	148	148	240	260	359	363	380	380	346	346	191	195	173	175	220	222	158	172
ETN13FT-V7	Outer	267	291	124	152	159	183	270	270	186	186	343	367	232	244	230	250	140	144	213	217	118	120	90	90	168	224	115	115	197	199	142	148	210	210	359	363	344	360	346	346	191	197	173	173	222	222	156	156
ETN13FT-V70	Outer	287	291	132	148	135	143	238	238	154	166	331	335	228	236	214	234	140	144	229	233	118	118	66	94	192	200	115	121	197	197	142	146	250	260	363	367	340	356	346	360	191	191	173	175	222	222	156	160
ETN13FT-V71	Outer	335	335	124	148	127	183	242	254	122	186	323	371	232	232	214	246	140	140	217	217	118	118	86	94	168	192	115	121	187	193	142	144	210	260	359	363	334	352	346	346	191	193	173	173	220	222	154	156
ETN13FT-V72	Outer	275	279	132	148	143	155	238	266	138	154	303	355	232	236	226	246	140	140	217	249	116	118	90	114	196	224	103	121	191	197	118	144	240	240	363	363	332	356	352	360	193	193	173	173	220	222	156	156
ETN13FT-V73	Outer	295	331	128	136	143	171	238	262	122	178	311	319	224	252	214	230	140	144	221	249	118	118	90	90	176	196	115	121	181	191	118	140	250	260	359	365	328	360	346	346	191	195	173	173	222	222	156	168
ETN13FT-V74	Outer	295	311	124	148	127	143	238	238	182	186	323	331	224	236	238	246	140	144	213	217	118	120	98	114	180	196	107	115	193	195	142	146	230	260	359	365	332	364	346	346	197	197	173	173	220	222	154	172
ETN13FT-V75	Outer	275	303	124	124	127	135	238	246	122	170	319	347	236	236	234	246	140	144	225	233	118	118	90	102	168	200	115	115	187	199	148	158	260	280	359	363	344	372	346	352	191	197	173	173	220	222	156	156
ETN13FT-V76	Outer	279	323	128	132	127	191	258	274	142	162	323	331	224	232	238	238	140	144	217	217	118	120	90	90	168	204	107	121	189	197	142	144	230	280	365	367	322	356	346	352	197	197	173	175	222	222	160	168
ETN13FT-V77	Outer	287	299	152	152	135	143	238	238	162	186	363	363	224	244	250	254	144	144	241	249	118	118	90	126	168	180	115	115	195	197	142	158	260	260	365	365	364	368	346	346	191	197	173	179	212	222	154	156
ETN13FT-V78	Outer	275	303	124	148	155	163	238	246	154	162	315	319	224	249	242	254	140	140	217	229	118	120	86	90	168	196	103	121	193	197	148	160	260	280	359	359	328	336	346	346	191	197	173	173	220	220	156	160
ETN13FT-V79	Outer	279	323	132	136	127	163	238	250	154	174	343	343	232	248	226	234	140	140	197	217	118	118	98	102	188	196	103	115	187	193	134	164	260	290	359	363	360	364	346	346	193	197	173	173	222	222	154	156
ETN13FT-V8	Outer	275	315	148	152	127	163	250	262	170	206	343	351	224	249	218	234	140	140	213	217	118	118	90	126	196	200	103	115	181	197	146	148	240	280	359	363	356	364	346	346	191	193	173	173	220	222	156	160
ETN13FT-V80	Outer	295	315	124	124	135	163	246	254	122	162	339	347	236	248	234	242	140	144	225	229	118	120	90	102	196	200	103	103	197	217	146	146	260	260	363	367	328	368	346	346	191	195	173	175	212	222	154	156
ETN13FT-V81	Outer	291	335	132	164	127	131	234	254	122	186	307	355	232	236	222	230	140	140	213	217	118	118	86	90	184	196	103	115	187	191	146	160	250	280	359	367	336	352	346	360	191	193	173	173	220	220	154	158
ETN13FT-V82	Outer	279	283	132	148	143	183	254	270	162	170	355	359	212	244	210	218	144	144	213	249	120	122	90	114	172	188	103	121	187	193	118	142	250	260	359	363	372	380	346	346	191	201	173	175	222	222	168	168
ETN13FT-V83	Outer	295	303	124	148	163	183	238	254	174	182	331	355	224	249	218	222	140	140	217	217	118	118	90	94	172	188	103	107	193	217	134	148	260	290	367	367	340	340	346	352	191	195	173	173	210	222	156	160
ETN13FT-V84	Outer	303	319	148	148	143	183	250	270	174	182	323	363	224	224	230	242	140	144	209	229	118	118	90	98	168	168	121	121	195	197	118	144	230	250	367	367	360	360	346	352	191	193	173	173	220	222	154	156
ETN13FT-V85	Outer	251	307	128	152	163	171	238	238	122	218	315	327	244	252	238	250	140	140	209	217	118	122	66	90	184	196	117	123	191	195	142	142	260	260	359	367	352	368	346	346	197	197	173	173	212	214	154	156
ETN13FT-V86	Outer	275	299	124	132	135	135	238	242	146	198	319	359	224	248	222	230	140	144	217	217	112	118	90	114	192	192	121	121	187	197	142	144	290	290	359	363	352	360	346	360	193	197	173	173	220	220	156	158
ETN13FT-V87	Outer	275	295	124	152	127	155	258	262	170	174	319	363	224	249	234	238	140	140	203	213	116	120	90	90	168	180	107	115	187	187	136	146	260	360	359	359	336	340	346	352	191	197	173	173	216	222	154	156
ETN13FT-V88	Outer	259	295	152	156	127	159	238	242	178	186	327	363	224	252	234	242	140	144	213	213	118	122	90	90	164	196	107	115	193	193	134	148	260	260	359	367	364	372	346	346	191	193	173	173	220	220	156	172
ETN13FT-V89	Outer	295	335	124	132	123	127	238	242	174	206	319	323	224	248	218	250	140	144	229	233	120	120	98	114	184	184	115	121	187	187	148	148	210	260	363	367	360	360	346	346	191	193	173	173	220	222	154	156
ETN13FT-V9	Outer	303	331	124	132	131	131	238	274	154	166	307	355	224	244	234	238	140	144	217	217	112	116	90	126	176	188	103	121	195	197	144	146	260	280	359	363	336	352	346	360	195	197	173	173	222	222	154	156
ETN13FT-V90	Outer	275	299	124	132	139	143	242	250	162	190	319	347	244	248	230	234	140	140	217	233	118	118	90	90	188	188	121	121	191	197	118	142	260	290	359	363	348	368	346	346	193	197	173	173	220	222	156	156
ETN13FT-V91	Outer	291	315	148	160	135	199	238	238	122	162	339	363	232	248	242	242	140	144	225	237	118	118	90	102	200	236	115	121	181	187	142	144	260	280	359	363	336	352	346	346	191	191	173	173	222	222	154	156
ETN13FT-V92	Outer	287	303	128	148	139	191	246	254	162	162	355	367	236	248	238	246	140	144	213	217	118	118	90	98	172	196	107	115	191	197	146	146	230	240	363	367	360	376	346	346	197	197	173	173	210	220	156	156
ETN13FT-V93	Outer	315	343	124	124	143	143	238	258	162	166	315	371	232	244	238	238	140	140	213	213	116	120	90	122	188	200	115	115	181	193	134	146	260	260	359	359	316	336	346	346	197	197	173	173	212	220	154	170
ETN13FT-V94	Outer	295	343	124	132	131	139	238	242	138	138	323	359	224	236	234	250	144	144	197	225	118	118	98	102	172	184	115	123	195	197	134	140	260	260	359	367	328	380	346	360	191	197	173	173	210	220	156	156
ETN13FT-V95	Outer	279	299	124	152	127	183	242	258	178	182	327	343	224	224	218	238	140	140	217	217	118	120	94	98	164	200	115	115	181	193	134	136	260	290	363	365	326	336	346	346	193	197	173	173	220	220	154	156
ETN13FT-V96	Outer	259	315	128	132	131	179	238	238	178	186	339	411	224	224	242	250	140	140	213	221	118	118	94	102	172	184	103	121	191	197	134	154	230	260	359	363	328	364	346	346	193	197	173	173	220	226	156	156
ETN13FT-V97	Outer	299	307	136	152	127	143	238	238	118	210	327	351	232	248	238	242	144	144	213	217	118	118	90	102	200	204	103	121	181	191	144	144	260	260	0	0	336	344	346	348	193	197	173	173	210	222	154	156
ETN13FT-V98	Outer	335	347	124	148	159	159	238	238	174	194	331	359	244	252	214	218	140	144	217	241	118	120	90	94	184	260	103	121	187	193	134	142	210	260	363	367	360	372	346	346	193	195	173	175	220	222	156	156
ETN13FT-V99	Outer	267	275	124	152	131	183	238	246	122	182	315	319	232	236	234	242	140	140	229	233	118	118	90	94	168	192	115	121	193	195	144	160	250	280	359	359	336	372	360	362	197	201	173	173	210	222	156	156
FR18SS-001	Outer	267	287	144	148	135	147	238	250	182	182	303	367	224	224	210	242	144	144	213	225	118	120	0	0	176	188	0	0	0	0	140	144	290	290	359	359	328	368	346	346	197	197	173	179	220	220	154	168
FR18SS-002	Outer	275	315	128	152	135	143	238	238	154	166	303	347	232	236	210	238	140	144	197	225	118	120	0	0	0	0	0	0	0	0	140	146	0	0	359	359	340	364	346	352	193	193	173	173	220	220	154	156
FR18SS-003	Outer	291	347	128	132	143	143	258	270	146	174	343	403	224	244	222	226	140	144	213	213	118	118	0	0	0	0	0	0	0	0	140	142	0	0	359	359	356	366	346	348	193	197	173	173	220	222	154	156
FR18SS-004	Outer	319	331	132	136	139	143	238	238	194	214	347	355	236	236	234	242	144	144	217	229	118	120	0	0	168	176	0	0	0	0	118	160	230	230	359	365	344	360	346	360	191	193	173	173	222	222	156	166
FR18SS-005	Outer	323	323	152	168	123	143	242	258	150	166	311	347	224	232	230	234	140	144	217	225	118	120	0	0	0	0	0	0	187	187	140	146	260	280	359	363	340	372	360	360	197	197	173	173	220	220	156	168
FR18SS-006	Outer	267	279	144	144	135	171	238	238	182	198	303	367	224	236	210	242	144	144	213	221	118	120	0	0	176	188	0	0	181	195	140	144	250	250	359	359	328	360	346	346	197	197	173	173	220	220	154	168
FR18SS-007	Outer	327	343	132	144	127	131	238	242	182	194	327	331	228	249	234	254	140	140	217	233	120	120	0	0	0	0	0	0	0	0	118	144	250	260	359	359	322	348	352	360	193	201	173	173	222	222	154	158
FR18SS-008	Outer	283	323	132	164	127	155	238	238	166	182	327	335	244	249	234	254	140	140	217	233	0	0	82	82	0	0	0	0	0	0	142	144	260	260	359	359	322	360	346	352	193	197	173	173	222	222	154	158
FR18SS-009	Outer	267	323	124	168	123	159	238	250	150	198	343	347	244	244	230	238	144	144	217	225	0	0	0	0	0	0	0	0	0	0	0	0	280	290	359	359	336	340	346	360	197	197	173	173	220	222	156	160
FR18SS-010	Outer	291	319	132	136	139	163	238	242	142	190	303	351	224	236	202	250	140	140	221	229	0	0	0	0	168	168	0	0	0	0	146	160	210	260	359	363	344	372	346	346	191	197	173	175	222	222	154	156
FR18SS-011	Outer	295	323	148	152	127	191	242	258	166	194	307	331	224	224	234	242	140	140	217	225	120	120	0	0	192	196	115	121	187	195	140	144	260	260	359	363	322	372	352	360	193	197	173	173	222	222	158	168
FR18SS-012	Outer	307	319	148	148	135	163	238	246	154	158	303	363	232	244	234	238	140	140	225	225	118	118	0	0	0	0	103	115	0	0	134	140	280	280	359	359	356	364	346	346	193	195	173	173	220	222	154	154
FR18SS-013	Outer	319	323	136	148	143	163	238	242	142	182	347	347	224	232	234	250	140	144	221	229	0	0	0	0	196	208	0	0	0	0	146	160	260	260	359	363	344	356	346	346	191	197	173	173	220	222	154	156
FR18SS-014	Outer	279	315	124	132	143	143	238	238	186	190	303	371	224	224	234	250	140	140	225	229	0	0	0	0	168	196	109	121	191	193	146	146	260	260	363	367	344	372	346	346	191	195	173	175	222	222	154	160
FR18SS-015	Outer	271	295	144	148	143	187	238	258	122	182	347	363	224	224	222	254	140	144	217	225	0	0	0	0	0	0	0	0	0	0	144	146	0	0	359	363	352	356	360	360	191	195	173	175	220	222	156	158
FR18SS-016	Outer	267	267	148	152	143	143	242	258	150	150	331	339	224	236	222	250	140	144	213	221	0	0	0	0	0	0	0	0	0	0	140	144	0	0	359	359	322	356	346	352	197	197	173	175	222	226	156	156
FR18SS-017	Outer	283	319	132	136	139	143	238	250	186	194	319	347	236	236	234	246	144	144	217	229	0	0	0	0	0	0	0	0	0	0	144	160	230	230	359	365	328	344	346	360	191	197	173	173	222	222	154	156
FR18SS-018	Outer	275	303	124	148	143	143	238	238	154	190	343	371	232	244	0	0	140	150	221	225	0	0	0	0	0	0	0	0	0	0	144	146	290	290	359	359	356	360	346	346	191	191	173	173	220	222	154	160
FR18SS-019	Outer	279	323	144	168	131	143	238	250	146	194	343	351	224	224	234	234	140	140	213	217	0	0	0	0	0	0	0	0	0	0	146	146	0	0	359	363	356	368	346	346	193	195	173	173	220	222	154	156
FR18SS-021	Outer	303	323	124	132	167	183	238	242	170	190	319	335	224	224	230	246	140	144	209	217	0	0	0	0	0	0	0	0	0	0	138	142	0	0	363	367	356	364	346	360	191	193	168	173	220	220	156	160
FR18SS-022	Outer	291	343	132	148	127	199	238	250	194	198	311	331	249	249	234	238	140	144	229	237	0	0	0	0	0	0	0	0	0	0	118	164	0	0	359	367	322	372	346	346	191	193	173	173	222	222	158	158
FR18SS-023	Outer	323	327	124	124	143	167	238	258	166	190	359	367	224	249	234	254	140	144	217	221	0	0	0	0	0	0	0	0	0	0	144	146	0	0	359	363	356	368	346	346	195	197	173	173	220	222	154	158
FR18SS-024	Outer	323	327	124	148	163	167	246	246	122	190	323	371	232	236	234	254	140	144	217	221	0	0	82	90	172	188	107	121	0	0	144	144	250	290	363	363	356	368	346	346	195	197	173	175	220	222	158	160
FR18SS-025	Outer	283	303	136	148	127	143	238	246	114	166	339	383	224	244	234	250	140	140	225	245	0	0	86	90	196	256	109	115	195	197	134	140	260	280	359	359	320	324	342	346	195	197	173	175	222	222	156	170
FR18SS-026	Outer	315	323	124	124	127	163	238	258	146	166	327	355	224	244	230	234	140	144	225	245	0	0	86	90	196	256	103	115	187	197	134	146	230	280	359	359	324	340	342	346	195	197	173	173	220	220	156	170
FR18SS-027	Outer	303	323	152	164	127	135	238	246	170	182	327	339	224	249	238	254	140	140	197	221	118	120	90	102	176	192	115	115	181	195	146	146	260	260	359	367	340	348	346	346	193	197	173	173	212	220	154	158
FR18SS-028	Outer	291	323	124	152	127	131	242	258	146	194	339	355	244	248	230	238	140	144	203	217	0	0	90	90	196	196	115	121	181	193	144	146	250	260	360	365	324	356	346	346	197	201	173	175	210	220	154	156
FR18SS-029	Outer	291	311	124	152	143	143	238	246	182	194	311	371	236	252	238	242	140	140	203	217	0	0	90	90	196	196	115	121	181	193	146	146	250	260	359	359	324	336	346	352	193	201	173	173	212	220	154	156
FR18SS-030	Outer	299	315	124	136	143	143	238	270	182	186	303	343	224	232	234	238	140	144	221	229	0	0	86	90	188	196	109	121	181	193	146	146	260	290	359	363	340	344	346	346	191	193	173	173	222	222	154	156
FR18SS-031	Outer	279	283	132	148	159	167	238	242	166	178	335	347	224	236	202	222	140	140	229	233	0	0	90	90	168	184	115	121	195	195	144	146	240	250	363	363	0	0	0	0	191	193	0	0	0	0	158	160
FR18SS-033	Outer	275	295	148	148	131	183	250	258	154	182	311	343	224	236	230	238	140	144	197	225	118	118	90	90	168	200	115	115	181	193	142	164	250	260	359	359	360	364	346	360	191	197	173	173	222	222	158	158
FR18SS-034	Outer	279	343	132	144	127	143	242	246	166	186	343	359	244	249	218	238	140	144	217	229	0	0	90	94	196	196	103	115	187	195	146	160	260	260	359	363	352	356	346	360	193	197	173	173	222	222	154	158
FR18SS-035	Outer	275	299	144	152	143	183	238	258	154	186	311	387	232	236	238	254	140	140	197	213	118	120	90	102	168	204	115	121	195	195	134	142	230	240	359	359	360	368	346	352	197	197	173	173	220	222	154	158
FR18SS-036	Outer	291	343	148	152	127	127	238	242	166	174	327	335	228	249	230	234	140	140	213	229	120	120	110	110	172	196	115	115	195	195	118	118	240	260	359	363	336	356	346	346	193	197	173	175	212	222	154	158
FR18SS-037	Outer	291	299	124	152	131	183	238	250	154	182	311	351	228	244	238	254	140	140	233	237	118	118	90	126	168	184	115	121	181	197	118	146	240	260	359	359	348	360	346	346	191	197	173	173	222	222	158	158
FR18SS-038	Outer	267	311	148	152	143	143	238	238	150	190	331	371	236	236	222	222	144	144	213	225	116	118	102	110	188	208	103	115	193	195	140	144	290	290	359	365	340	356	346	346	195	197	173	175	226	226	156	156
FR18SS-039	Outer	267	323	124	144	143	163	238	246	150	150	351	367	244	249	206	238	140	144	213	233	120	120	94	126	168	188	115	121	197	213	140	164	250	360	359	359	0	0	0	0	193	195	0	0	0	0	154	168
FR18SS-040	Outer	287	323	132	132	127	163	238	242	114	194	331	339	240	249	206	234	140	140	217	237	0	0	110	122	180	196	121	121	191	195	118	144	260	260	359	363	322	344	346	352	193	197	173	173	212	222	154	158
FR18SS-041	Outer	307	323	124	132	131	131	238	242	138	194	339	343	224	252	234	254	140	144	213	217	118	124	102	110	184	200	115	121	187	195	146	146	260	260	359	359	326	352	346	352	191	193	173	173	220	220	154	156
FR18SS-042	Outer	275	323	132	148	127	155	238	250	122	194	327	331	224	249	234	254	140	140	217	229	118	118	90	110	196	200	115	121	193	195	144	146	260	260	359	359	322	360	346	346	191	201	173	173	220	222	154	158
FR18SS-043	Outer	291	299	148	152	127	163	246	258	122	150	303	363	224	244	210	234	140	144	225	229	118	120	90	118	192	196	103	115	193	197	134	146	260	280	357	363	326	344	346	346	191	197	173	173	220	222	154	158
FR18SS-044	Outer	267	291	124	124	127	131	242	258	146	186	339	347	248	252	226	234	140	140	203	217	118	122	90	98	196	196	115	115	193	193	140	146	250	260	359	360	356	364	342	352	193	197	173	175	210	220	154	156
FR18SS-045	Outer	279	303	124	152	131	143	238	238	134	142	303	339	236	244	234	254	140	144	217	225	116	118	90	102	168	184	103	115	181	181	140	150	230	260	359	365	352	368	346	360	193	195	173	173	220	220	154	170
FR18SS-046	Outer	291	335	124	152	139	163	242	250	150	174	319	371	236	244	246	250	140	144	221	221	116	116	90	106	188	240	103	121	201	217	140	160	250	290	359	363	320	368	346	352	191	193	173	173	222	226	156	156
FR18SS-047	Outer	323	335	124	148	127	143	246	250	142	162	339	367	232	252	234	238	140	140	221	229	0	0	102	106	184	196	103	121	191	193	118	144	240	360	363	363	0	0	0	0	195	197	175	175	0	0	154	156
FR18SS-048	Outer	279	311	124	152	143	163	242	282	138	198	303	339	224	224	250	250	140	140	217	225	116	116	102	126	188	240	115	121	187	189	140	150	290	290	359	359	336	368	346	346	195	197	173	173	222	222	156	160
FR18SS-049	Outer	267	343	132	148	127	135	238	242	166	198	331	339	224	249	222	234	140	144	213	229	120	120	94	110	168	196	121	121	195	195	118	118	260	290	359	363	0	0	0	0	193	197	173	173	0	0	158	170
FR18SS-050	Outer	279	327	124	144	135	199	238	238	150	150	311	327	224	232	202	230	140	140	233	237	116	118	94	126	172	196	115	121	195	195	150	160	250	260	359	359	348	356	346	360	193	195	173	173	212	220	154	156
FR18SS-051	Outer	275	319	132	148	143	143	238	242	142	186	319	391	244	249	238	242	140	144	203	221	0	0	90	94	176	196	115	121	181	217	118	146	210	230	359	359	330	372	346	346	193	197	173	173	220	220	168	170
FR18SS-052	Outer	279	295	132	136	143	163	238	238	170	186	331	351	224	249	222	246	140	140	213	233	120	120	90	102	168	256	107	121	197	217	140	146	260	260	359	363	352	372	346	380	191	197	173	173	220	220	160	168
FR18SS-053	Outer	283	291	152	164	167	171	246	246	138	166	327	343	232	244	226	242	140	140	213	213	122	122	90	94	188	196	115	115	187	191	136	146	260	280	359	360	336	340	346	346	191	197	173	175	220	220	156	160
FR18SS-054	Outer	311	315	148	152	135	143	238	242	122	138	327	331	224	236	230	234	140	140	217	217	118	122	90	90	196	200	115	121	181	195	118	140	250	290	359	365	340	380	346	352	193	197	173	175	222	222	154	156
FR18SS-055	Outer	279	343	124	132	127	143	238	238	150	194	331	343	236	249	234	234	140	144	217	237	116	120	90	94	196	208	103	115	181	193	140	144	260	290	363	365	0	0	0	0	191	201	0	0	0	0	156	158
FR18SS-056	Outer	287	315	132	132	131	183	238	250	170	182	335	339	224	240	234	238	140	144	213	217	0	0	90	90	176	188	115	115	181	195	146	146	230	260	359	365	340	356	346	360	191	193	173	173	212	222	154	154
FR18SS-057	Outer	275	283	148	168	143	151	238	242	142	186	331	331	236	249	218	234	140	140	213	253	0	0	90	114	192	196	103	121	181	197	146	146	260	260	363	365	364	372	346	352	191	197	173	173	220	226	156	168
FR18SS-058	Outer	283	319	124	132	143	183	238	250	194	214	343	355	236	244	242	246	140	140	229	233	120	120	90	102	168	176	103	107	187	189	118	142	210	230	359	365	344	360	346	352	191	193	173	173	222	222	156	166
[truncated: 12 more columns]

## Sheet: Trawl all years
30	613	1	613
			Trawl
ID	Pop	SSsp2201	SSsp2201	SSsp2210	SSsp2210	SSspG7	SSspG7	Ssa202	Ssa202	SsaD144	SsaD144	SsaD157	SsaD157	Sp1605	Sp1605	Sp2216	Sp2216	Ssa14	Ssa14	Ssa171	Ssa171	Ssa289	Ssa289	SSsp3016	SSsp3016	Ssa197	Ssa197	SsaF43	SsaF43	SsOsl85	SsOsl85	MHC1	MHC1	MHC2	MHC2	EST107	EST107	EST19	EST19	EST28	EST28	EST68	EST68	Sleel53	Sleel53	Sleen82	Sleen82	SsOSL25	SsOSL25
4-13HF-033	Trawl	247	355	96	96	143	143	250	250	0	0	339	339	224	224	0	0	0	0	0	0	0	0	62	90	172	172	115	115	177	187	146	146	210	320	359	359	356	356	0	0	193	199	173	173	222	222	0	0
4-13HF-034	Trawl	275	323	140	148	163	199	0	0	158	178	359	379	224	244	230	234	140	140	0	0	112	116	110	142	176	192	103	103	189	197	142	164	250	260	363	363	348	360	346	360	193	201	173	173	222	226	156	164
4-13HF-035	Trawl	299	307	144	152	143	147	250	250	154	174	315	343	224	244	0	0	0	0	0	0	0	0	70	82	172	184	109	115	181	187	136	146	230	240	359	365	336	360	346	352	191	197	173	173	220	220	156	156
4-13HF-037	Trawl	299	307	132	144	131	155	242	258	122	190	371	371	232	244	210	238	140	144	197	197	118	118	90	90	184	184	103	103	193	193	142	142	260	260	363	363	356	356	346	360	197	197	173	173	220	220	154	160
4-13HF-038	Trawl	287	287	96	148	131	135	0	0	0	0	0	0	224	244	0	0	140	140	0	0	118	118	90	90	168	224	121	121	187	187	140	146	300	360	0	0	368	372	346	346	191	193	173	173	220	222	154	154
4-13HF-040	Trawl	0	0	0	0	0	0	0	0	0	0	0	0	224	236	230	234	140	140	217	225	116	122	90	90	200	200	115	123	181	197	142	160	260	290	359	359	336	356	346	346	197	197	173	173	222	222	154	158
4-13HF-045	Trawl	275	307	124	124	127	143	238	238	154	194	343	391	236	249	226	246	140	144	217	235	116	120	90	98	172	192	115	115	187	193	140	140	260	260	359	359	322	364	352	360	197	197	173	173	220	226	154	156
4-13HF-046	Trawl	0	0	132	152	127	143	0	0	154	158	0	0	232	240	0	0	144	144	213	221	118	120	90	90	192	200	103	115	193	197	142	164	230	250	0	0	340	360	346	360	191	195	173	173	220	222	156	156
4-13HF-048	Trawl	283	291	124	152	131	147	246	246	142	154	307	351	0	0	0	0	0	0	0	0	0	0	0	0	228	256	0	0	0	0	136	140	0	0	359	363	322	376	360	360	191	201	173	173	222	222	138	156
4-13HF-049	Trawl	275	311	148	152	127	147	238	238	122	158	351	355	224	224	218	242	140	144	217	233	118	122	90	102	172	192	103	115	191	199	134	134	260	290	359	367	332	360	360	360	191	195	173	173	220	222	154	156
4-13HF-050	Trawl	275	283	124	144	123	167	238	282	130	170	355	375	240	244	234	234	140	140	213	217	116	118	90	90	192	192	121	121	191	195	160	164	250	260	363	367	364	368	346	346	191	195	173	173	216	220	154	154
4-13HF-051	Trawl	267	359	152	152	135	139	238	250	162	166	355	355	224	232	242	254	140	144	237	241	118	118	86	94	200	204	115	115	187	197	146	164	240	290	367	367	326	360	346	346	191	195	173	173	220	222	154	160
4-13HF-053	Trawl	267	311	124	124	127	135	246	250	154	162	0	0	236	236	0	0	140	140	241	245	0	0	94	94	176	204	115	115	0	0	140	142	0	0	359	365	340	368	346	346	191	193	173	177	220	222	156	156
4-13HF-054	Trawl	287	311	124	152	147	171	242	250	166	194	0	0	236	244	0	0	140	140	213	217	0	0	0	0	176	184	115	115	0	0	142	146	0	0	359	359	352	360	344	346	193	197	173	173	220	222	156	174
4-13HF-055	Trawl	0	0	124	124	127	171	0	0	178	206	0	0	232	252	0	0	140	144	213	217	0	0	90	90	172	176	103	115	187	191	138	142	260	290	363	365	328	336	346	346	191	197	173	175	222	222	156	156
4-13HF-056	Trawl	0	0	124	132	0	0	0	0	134	154	0	0	224	244	0	0	144	144	229	229	0	0	90	94	168	236	103	121	0	0	142	144	260	260	363	363	352	352	346	346	191	195	173	175	220	222	154	156
4-13HF-057	Trawl	267	275	124	152	135	143	238	250	166	170	311	311	224	232	0	0	0	0	0	0	0	0	0	0	196	256	115	121	0	0	142	164	0	0	359	365	320	326	346	346	191	193	173	173	220	222	156	168
4-13HF-059	Trawl	275	279	132	148	127	143	0	0	194	194	0	0	244	252	0	0	140	140	217	229	0	0	0	0	176	176	115	115	0	0	142	148	0	0	359	359	344	352	346	346	191	197	173	175	220	222	150	166
4-13HF-064	Trawl	0	0	144	148	0	0	0	0	0	0	0	0	224	224	0	0	140	140	0	0	118	118	90	90	188	192	103	115	181	197	140	158	250	260	363	365	360	380	346	346	191	197	173	173	216	222	156	156
4-13HF-065	Trawl	279	339	132	148	131	143	238	246	178	182	335	347	232	236	226	234	140	144	217	229	118	118	98	110	192	228	115	115	181	197	118	148	230	260	363	363	336	360	346	360	191	197	173	175	222	222	156	160
4-13HF-066	Trawl	275	307	124	136	143	183	238	238	114	162	327	347	232	236	234	250	140	144	217	229	116	118	90	114	188	192	103	115	191	195	134	160	210	210	359	365	348	360	346	360	191	197	173	173	220	222	156	156
4-13HF-067	Trawl	291	299	144	148	143	147	0	0	138	174	0	0	224	244	0	0	140	140	0	0	118	122	90	102	188	192	115	121	187	217	136	146	250	280	359	359	320	340	346	346	197	197	173	175	222	222	154	166
4-13HF-068	Trawl	0	0	124	128	123	151	0	0	122	154	0	0	232	232	0	0	140	140	0	0	118	118	94	94	176	204	115	121	181	181	154	164	210	210	0	0	348	376	346	346	191	197	173	177	222	222	154	156
4-13HF-069	Trawl	0	0	132	136	123	127	250	270	122	138	0	0	224	224	0	0	140	140	0	0	116	118	90	90	172	196	115	121	181	213	134	136	250	290	359	367	318	340	346	352	191	193	173	173	222	222	156	156
4-13HF-070	Trawl	0	0	124	144	135	143	238	242	170	198	347	359	236	244	238	250	140	140	217	225	118	120	82	110	176	224	107	121	191	193	144	146	240	250	367	367	326	348	346	352	193	199	173	173	222	222	154	156
4-13HF-071	Trawl	0	0	124	156	143	143	242	242	122	134	0	0	244	249	214	238	140	140	0	0	118	120	90	90	164	188	103	115	181	197	118	146	210	260	359	367	360	360	346	360	193	197	173	173	220	222	152	174
4-13HF-072	Trawl	287	287	124	148	131	159	250	254	122	174	335	339	244	244	222	230	140	140	217	229	118	118	90	94	192	208	115	115	187	195	144	148	240	250	359	367	320	372	346	346	191	197	173	173	220	222	154	154
4-13HF-074	Trawl	275	283	132	132	135	163	238	238	134	150	351	355	224	232	230	254	140	144	197	239	118	118	90	94	168	176	115	123	187	197	144	160	260	360	359	359	344	360	346	346	193	197	173	173	220	222	156	158
4-13HF-075	Trawl	303	303	132	136	131	143	238	238	122	150	0	0	0	0	0	0	0	0	0	0	0	0	90	122	168	168	115	121	195	197	146	146	280	290	359	367	344	356	346	346	191	197	173	173	220	222	154	156
4-13HF-076	Trawl	0	0	124	132	143	159	0	0	122	130	0	0	244	244	234	250	140	144	217	233	118	118	90	106	168	168	103	115	181	195	140	146	240	260	359	359	356	360	346	352	191	197	173	173	220	222	154	156
4-13HF-077	Trawl	0	0	132	132	131	135	0	0	0	0	0	0	224	232	0	0	140	140	0	0	120	120	90	90	192	200	115	123	193	197	144	148	0	0	363	363	360	372	346	346	191	191	173	173	220	222	152	154
4-13HF-079	Trawl	0	0	124	132	127	155	0	0	0	0	0	0	224	244	230	242	140	140	217	249	118	118	94	134	184	216	115	115	181	181	134	146	250	290	359	365	356	364	346	346	193	197	173	173	220	222	154	154
4-13HF-080	Trawl	0	0	0	0	131	151	0	0	0	0	0	0	244	244	218	242	140	140	217	229	118	118	90	94	184	240	115	115	195	195	148	158	260	260	359	367	320	340	346	346	191	197	173	173	220	222	154	174
4-13HF-081	Trawl	0	0	0	0	143	187	0	0	0	0	0	0	224	249	0	0	140	140	0	0	118	122	90	126	188	192	115	115	181	197	118	140	210	210	359	359	344	356	346	346	191	197	173	173	220	222	154	156
4-13HF-082	Trawl	0	0	0	0	0	0	0	0	0	0	0	0	244	244	218	250	140	144	213	229	0	0	106	118	192	200	103	115	191	193	142	146	240	360	359	359	332	356	346	346	191	195	173	179	222	222	156	160
4-13HF-083	Trawl	0	0	124	128	123	167	0	0	0	0	0	0	0	0	0	0	144	144	0	0	0	0	90	90	172	188	115	115	181	195	144	160	260	260	359	359	336	344	346	346	193	193	173	173	220	220	156	156
4-13HF-084	Trawl	0	0	0	0	131	159	0	0	0	0	0	0	244	244	222	230	140	140	217	217	118	118	90	94	192	208	103	121	195	195	148	158	240	260	359	363	340	356	346	346	191	197	173	173	220	222	154	174
4-13HF-088	Trawl	0	0	0	0	0	0	0	0	0	0	0	0	224	244	0	0	140	140	217	229	0	0	90	98	200	204	103	103	0	0	134	146	230	360	359	359	340	360	352	360	197	197	173	175	210	218	156	158
4-13HF-089	Trawl	0	0	124	132	143	163	0	0	0	0	0	0	236	249	0	0	140	140	213	235	120	122	90	102	168	196	103	115	0	0	140	144	260	370	0	0	324	326	346	360	195	197	173	173	220	220	154	156
HF13SS-002	Trawl	255	323	152	152	123	143	0	0	162	162	0	0	224	224	206	230	140	144	217	235	120	122	90	98	188	204	107	121	187	197	144	164	280	290	363	363	340	372	346	346	191	193	173	173	220	220	156	172
HF13SS-003	Trawl	279	299	148	152	171	179	0	0	130	166	0	0	224	244	230	230	140	140	229	241	118	120	90	90	196	200	115	115	195	195	134	148	250	250	359	363	360	364	346	346	193	197	173	173	222	222	154	160
HF13SS-004	Trawl	263	311	124	152	127	179	0	0	154	170	343	351	236	240	218	234	144	144	217	221	118	118	90	118	176	184	115	121	181	195	134	142	230	260	359	359	322	372	346	356	191	195	173	173	220	220	154	160
HF13SS-005	Trawl	0	0	132	148	127	171	0	0	0	0	0	0	236	244	0	0	140	140	0	0	118	124	0	0	164	168	115	115	195	195	144	146	280	280	359	363	364	364	346	346	193	193	173	175	220	222	158	160
HF13SS-006	Trawl	279	295	132	136	143	147	250	266	150	202	315	331	224	224	0	0	144	144	213	233	116	118	90	126	196	248	115	115	187	191	142	144	230	260	359	359	0	0	0	0	191	193	0	0	0	0	156	168
HF13SS-008	Trawl	279	319	124	152	131	143	0	0	118	130	311	335	224	236	0	0	144	146	217	237	120	122	0	0	200	228	121	121	183	187	142	148	230	260	359	359	332	336	346	346	197	197	173	173	210	220	154	156
HF13SS-009	Trawl	311	331	148	148	143	147	242	250	166	198	323	335	224	236	226	238	140	140	219	229	120	122	86	90	184	248	115	121	191	191	146	164	260	360	365	367	324	336	346	346	191	197	175	177	212	224	156	158
HF13SS-010	Trawl	303	307	124	152	127	187	238	238	166	178	339	343	224	244	0	0	140	144	217	221	118	122	90	126	184	192	115	121	191	195	118	142	280	360	359	365	336	360	360	360	191	193	173	173	212	224	154	158
HF13SS-014	Trawl	275	283	148	152	123	135	0	0	150	178	319	343	224	236	0	0	140	140	217	217	118	122	0	0	172	248	115	115	187	187	118	140	230	260	359	359	0	0	0	0	197	197	0	0	0	0	154	168
HF13SS-016	Trawl	0	0	124	152	135	163	0	0	142	142	0	0	224	224	0	0	140	140	0	0	120	122	0	0	172	188	103	115	195	195	140	144	360	360	363	367	340	344	360	360	191	193	173	173	220	222	156	172
HF13SS-017	Trawl	267	275	124	124	163	171	242	242	118	150	339	351	224	244	0	0	140	144	225	235	118	118	90	110	172	208	115	115	189	195	144	158	260	260	363	367	356	368	346	346	191	193	173	175	220	222	154	156
HF13SS-018	Trawl	267	275	148	148	123	143	0	0	110	174	303	303	244	244	0	0	140	144	229	243	118	120	0	0	196	224	115	115	191	191	134	142	260	360	359	359	360	364	346	346	191	197	173	175	212	220	154	154
HF13SS-019	Trawl	0	0	148	148	143	179	0	0	154	190	0	0	232	236	0	0	140	140	0	0	118	118	0	0	196	196	115	115	181	187	144	160	210	260	359	359	340	380	346	360	193	197	173	175	220	226	158	168
HF13SS-020	Trawl	0	0	132	148	167	179	0	0	150	174	0	0	0	0	0	0	140	140	0	0	116	122	0	0	168	192	121	123	181	181	118	148	260	260	363	363	360	364	346	360	191	191	173	175	220	220	154	154
HF13SS-021	Trawl	0	0	132	152	123	143	0	0	0	0	0	0	224	244	0	0	0	0	0	0	0	0	90	94	180	248	115	115	187	191	144	164	210	260	359	359	332	364	346	346	191	193	173	175	212	220	156	160
HF13SS-022	Trawl	291	295	152	152	127	143	0	0	114	158	323	343	240	244	0	0	140	140	213	221	118	120	90	90	168	184	107	115	181	193	142	146	260	260	357	359	0	0	0	0	191	191	174	174	0	0	156	158
HF13SS-023	Trawl	271	323	148	152	119	167	258	258	186	186	331	343	232	236	234	238	140	140	213	221	118	118	94	130	176	196	115	115	187	191	118	142	230	260	359	359	352	372	346	360	197	197	173	173	212	220	158	166
HF13SS-024	Trawl	255	295	128	152	127	167	238	238	130	190	351	355	236	244	246	250	140	144	217	217	118	122	94	114	172	188	115	115	181	191	134	146	260	260	363	367	360	368	346	346	193	197	173	173	220	222	154	156
HF13SS-026	Trawl	0	0	148	148	147	163	0	0	158	190	0	0	0	0	0	0	0	0	0	0	0	0	86	98	188	200	103	115	181	187	142	164	260	260	359	365	340	360	346	346	191	197	173	173	212	222	156	172
HF13SS-027	Trawl	0	0	124	152	167	183	0	0	166	174	315	339	0	0	0	0	0	0	0	0	0	0	0	0	192	248	103	115	195	213	142	146	260	260	363	365	364	368	346	352	191	197	173	173	222	226	156	166
HF13SS-029	Trawl	283	295	132	164	143	147	238	266	150	174	311	351	224	232	246	254	140	144	217	233	120	122	0	0	180	180	103	115	183	187	142	144	230	240	359	359	328	332	346	346	191	195	173	173	222	222	156	168
4-14HF-025	Trawl	279	339	124	152	127	143	238	242	154	178	311	339	232	236	218	246	144	144	217	221	118	120	90	94	172	192	121	121	181	187	136	142	250	260	359	363	320	352	346	352	191	193	173	173	210	220	154	156
4-14HF-026	Trawl	0	0	148	168	127	163	242	242	190	202	0	0	244	249	0	0	140	140	0	0	120	122	90	90	184	192	115	115	187	195	134	144	260	280	361	367	322	336	346	360	193	193	173	175	210	222	150	154
4-14HF-027	Trawl	275	283	132	148	127	143	262	266	150	154	315	351	236	244	0	0	140	140	227	237	118	118	94	98	184	204	107	121	181	193	142	146	260	260	363	363	368	372	346	346	191	197	173	173	220	226	160	168
4-15HF-002	Trawl	275	279	124	164	135	191	238	242	206	210	355	359	224	252	218	226	144	144	213	233	116	116	86	110	192	208	103	115	181	191	140	148	240	260	359	367	348	356	346	346	191	195	173	173	210	226	154	156
4-15HF-003	Trawl	303	303	152	152	123	147	246	246	158	166	315	339	224	244	222	234	140	140	213	233	118	120	98	102	188	256	115	115	197	197	144	146	280	290	359	360	368	368	346	346	191	195	173	173	212	222	156	156
4-15HF-008	Trawl	0	0	124	152	167	195	242	282	134	154	0	0	236	244	218	250	140	144	0	0	118	118	90	94	188	204	115	115	197	197	140	144	260	260	359	359	360	360	346	346	191	193	173	173	210	226	156	172
4-15HF-009	Trawl	291	307	164	164	135	143	242	266	174	182	343	371	224	232	206	242	140	140	213	229	116	118	90	110	184	188	103	115	195	199	134	146	210	290	359	363	328	332	346	352	193	197	173	173	220	222	156	158
4-15HF-010	Trawl	303	307	132	152	135	143	238	238	150	174	0	0	224	224	234	238	140	140	229	229	112	118	126	134	208	224	103	121	181	197	140	144	240	280	360	363	360	360	360	360	197	197	173	173	222	226	154	156
4-15HF-011	Trawl	0	0	148	152	135	135	238	270	0	0	0	0	224	244	218	242	140	144	217	217	118	124	90	94	172	192	107	115	197	197	118	144	290	290	363	367	360	364	346	346	191	197	173	175	220	222	156	170
HF15SS-028	Trawl	275	275	152	168	143	183	246	266	174	190	303	339	224	244	226	250	140	144	213	233	118	120	110	110	172	172	115	115	187	191	142	146	260	260	359	363	320	322	346	346	193	197	173	175	222	222	154	154
HF15SS-029	Trawl	299	323	128	148	127	171	238	254	170	178	367	379	224	224	222	234	140	144	217	229	120	120	110	142	196	200	115	115	189	195	142	164	230	230	359	360	360	360	346	346	195	197	173	173	220	222	158	170
HF15SS-030	Trawl	291	319	132	152	127	175	242	242	182	194	335	347	224	224	238	258	140	144	217	233	118	122	110	146	184	192	103	115	187	187	134	146	260	290	363	363	320	320	346	360	193	197	173	175	222	222	156	158
HF15SS-031	Trawl	279	295	124	152	139	159	238	250	170	194	299	343	232	240	202	238	140	140	0	0	118	118	0	0	0	0	115	115	181	189	142	142	260	260	359	363	326	364	346	360	191	197	173	173	212	222	152	156
HF15SS-032	Trawl	271	291	128	148	131	163	242	262	190	190	347	347	224	252	238	262	144	144	217	235	0	0	0	0	0	0	115	115	187	191	146	164	230	230	363	363	322	364	346	360	197	197	173	173	220	222	166	168
HF15SS-033	Trawl	275	295	132	152	123	131	238	266	142	178	351	371	224	224	206	238	140	140	217	229	0	0	0	0	0	0	115	115	189	195	142	142	230	280	359	363	322	332	346	346	195	197	173	175	220	222	156	172
HF15SS-034	Trawl	275	283	124	152	143	163	242	246	138	198	339	403	224	252	222	234	140	144	217	235	120	120	0	0	184	188	103	115	187	197	118	164	230	360	359	363	356	372	346	346	193	197	173	173	222	226	156	156
HF15SS-036	Trawl	275	335	128	164	131	171	238	238	146	218	307	339	224	244	214	242	140	146	221	225	118	122	0	0	0	0	115	115	181	217	144	146	210	260	359	365	340	356	360	360	191	193	173	175	222	226	160	160
HF15SS-037	Trawl	279	283	136	152	143	147	242	250	162	190	319	343	232	236	250	254	140	140	221	225	118	118	0	0	0	0	0	0	189	197	140	142	210	260	359	363	364	368	346	360	195	197	173	173	212	220	156	168
HF15SS-038	Trawl	275	287	124	128	163	167	242	262	178	186	379	387	224	244	230	234	140	144	217	229	118	118	0	0	0	0	115	121	181	187	134	158	280	280	359	363	340	356	346	346	191	197	173	173	222	222	156	156
HF15SS-039	Trawl	279	311	148	152	183	187	238	238	154	170	331	363	224	248	226	250	140	140	221	233	118	118	0	0	0	0	115	115	191	217	142	142	210	260	359	367	332	368	346	346	193	197	173	173	220	220	154	154
HF15SS-040	Trawl	275	315	132	148	127	163	238	246	158	194	319	351	232	240	206	242	140	140	0	0	118	118	0	0	0	0	0	0	0	0	140	142	210	210	359	365	324	364	346	346	193	197	173	173	220	220	156	156
HF15SS-041	Trawl	287	319	124	148	139	163	242	270	158	186	315	355	224	249	222	234	140	144	213	229	116	120	0	0	0	0	103	115	189	197	142	148	280	280	359	359	372	380	352	360	191	195	173	175	220	222	154	156
HF15SS-042	Trawl	275	283	124	156	147	159	238	254	138	146	311	371	236	244	202	210	140	144	217	229	118	120	0	0	168	200	121	121	187	197	146	158	260	260	367	367	326	364	346	360	197	197	173	173	220	222	156	168
HF15SS-043	Trawl	287	299	144	148	127	131	238	242	154	182	339	359	224	224	206	238	140	140	217	217	116	116	0	0	200	252	115	115	187	199	134	146	250	290	359	365	322	372	346	346	193	197	173	173	220	222	156	174
HF15SS-044	Trawl	275	307	124	132	131	163	238	238	170	206	319	387	244	248	246	254	140	140	213	233	118	122	0	0	0	0	115	115	187	197	146	146	260	260	359	359	356	380	352	360	195	195	173	173	212	212	154	156
HF15SS-045	Trawl	287	299	124	152	127	131	238	242	150	162	331	387	224	236	230	234	140	140	217	237	116	118	0	0	0	0	115	115	181	181	142	148	210	250	363	367	356	356	346	346	191	193	173	173	222	222	156	172
HF15SS-046	Trawl	279	311	124	128	127	143	238	238	122	178	327	327	224	224	234	246	140	144	197	217	116	118	0	0	0	0	115	121	193	197	144	148	230	260	359	359	320	368	346	346	191	191	173	173	210	222	156	156
HF15SS-047	Trawl	259	347	132	152	167	187	238	238	110	118	319	351	224	224	234	242	140	140	0	0	118	118	0	0	0	0	115	115	187	191	142	146	210	230	363	365	356	368	346	346	197	197	173	177	210	222	154	154
HF15SS-048	Trawl	279	291	148	152	131	131	238	266	190	194	327	331	232	236	222	226	144	144	217	221	118	118	0	0	0	0	0	0	187	187	118	144	240	260	360	363	326	336	346	346	193	193	173	173	222	222	154	160
HF15SS-049	Trawl	271	299	132	152	127	131	238	238	142	170	347	363	224	224	234	250	140	144	197	233	118	122	0	0	0	0	0	0	181	197	134	140	210	210	359	367	336	360	352	352	191	195	173	173	222	222	156	156
HF15SS-050	Trawl	275	275	148	148	127	147	238	238	158	186	331	339	232	244	222	254	140	140	213	221	118	120	0	0	0	0	115	121	187	193	142	144	260	260	363	367	326	360	346	346	197	197	173	173	220	222	154	156
HF15SS-051	Trawl	275	323	132	136	127	163	238	238	154	170	343	371	244	249	230	238	140	140	217	225	112	116	0	0	0	0	115	115	181	199	138	164	250	250	359	359	340	372	352	352	197	197	173	173	220	222	156	158
HF15SS-052	Trawl	287	331	148	164	127	147	242	270	194	198	319	351	224	244	230	242	140	140	221	229	118	118	0	0	0	0	121	121	191	191	164	164	240	260	359	363	320	368	346	360	197	201	175	175	220	220	154	156
HF15SS-053	Trawl	299	307	132	148	131	143	238	242	146	174	331	359	224	232	202	230	140	140	225	233	112	122	0	0	188	200	115	115	181	195	134	160	260	290	363	367	356	360	346	346	193	197	173	173	222	222	154	154
HF15SS-054	Trawl	275	291	132	164	143	143	238	250	170	190	343	351	224	224	230	246	140	146	209	221	118	122	0	0	0	0	115	121	181	195	134	140	250	260	359	363	368	380	346	360	191	195	173	173	210	222	154	156
HF15SS-055	Trawl	275	299	124	132	127	131	238	242	170	182	0	0	236	244	230	234	144	144	213	217	118	122	0	0	0	0	0	0	183	197	140	148	260	260	359	363	336	368	346	346	197	197	173	173	222	222	154	160
HF15SS-056	Trawl	283	295	132	144	147	159	250	250	178	194	363	371	244	244	242	250	140	144	229	233	112	118	0	0	176	224	0	0	181	193	134	136	250	290	363	363	336	360	346	360	193	197	173	173	220	220	156	158
HF15SS-057	Trawl	259	339	124	132	131	143	242	282	158	162	351	387	224	249	202	238	140	140	201	217	118	118	0	0	0	0	115	115	197	197	146	146	210	210	357	359	340	340	348	360	193	197	173	173	212	222	154	168
HF15SS-058	Trawl	307	315	148	148	131	143	238	262	174	174	323	339	232	244	218	246	140	140	225	229	0	0	0	0	0	0	121	121	181	195	146	160	260	280	359	359	356	356	346	346	191	195	173	173	222	222	156	160
HF15SS-060	Trawl	311	331	132	148	127	143	238	242	162	190	343	391	224	232	206	226	140	144	213	217	118	118	0	0	168	188	103	103	199	199	134	140	250	290	363	363	344	364	346	346	191	191	173	173	220	222	154	156
HF15SS-061	Trawl	287	315	132	132	127	163	246	250	150	154	331	339	236	244	234	250	140	144	203	217	118	122	0	0	0	0	109	115	191	197	136	146	230	260	359	359	336	360	346	352	193	197	173	173	222	222	154	170
HF15SS-062	Trawl	275	299	124	152	131	143	238	238	142	170	311	367	224	249	250	254	140	144	221	221	118	118	0	0	176	200	103	109	181	181	146	164	230	280	359	363	336	340	346	360	193	193	173	175	210	220	156	160
HF15SS-063	Trawl	279	287	128	152	147	163	238	270	162	170	331	343	224	240	222	242	140	140	213	229	118	118	0	0	0	0	103	115	197	217	118	146	230	250	359	359	326	336	346	346	193	197	173	173	218	220	156	172
HF15SS-064	Trawl	279	283	132	164	123	139	234	238	138	186	307	363	236	244	218	234	140	142	217	221	118	120	0	0	0	0	115	121	0	0	144	164	230	230	359	359	320	368	346	352	191	191	173	173	210	220	154	154
HF15SS-065	Trawl	259	279	124	168	131	131	242	258	166	174	335	379	224	236	210	230	140	140	217	229	116	124	0	0	0	0	115	115	195	217	146	146	290	290	359	363	322	360	346	346	197	197	173	173	222	222	154	154
HF15SS-066	Trawl	307	339	124	148	131	143	238	238	150	174	279	319	224	236	242	254	144	144	217	229	118	118	0	0	0	0	115	115	181	197	136	160	290	290	0	0	324	356	346	346	195	197	173	173	212	222	154	154
HF15SS-069	Trawl	275	307	128	136	127	143	238	250	158	174	307	335	248	248	218	246	140	144	225	229	118	120	0	0	0	0	115	121	191	191	142	160	260	260	359	363	336	336	346	346	197	197	168	173	222	226	156	156
HF15SS-070	Trawl	283	287	124	128	135	163	238	250	162	190	319	335	224	244	238	238	140	144	219	221	118	118	0	0	0	0	107	115	187	195	118	160	260	260	359	363	322	322	352	352	193	197	173	173	218	220	154	156
HF15SS-071	Trawl	0	0	132	152	127	167	238	242	154	162	347	363	224	248	230	234	140	144	0	0	0	0	0	0	0	0	0	0	0	0	144	146	240	260	363	365	356	360	346	346	197	197	173	175	220	220	156	156
HF15SS-072	Trawl	279	331	148	152	159	167	238	254	162	186	351	367	224	244	210	226	144	144	233	237	118	118	0	0	0	0	115	115	195	195	142	144	210	260	363	365	360	368	346	346	191	191	173	173	222	222	156	160
HF15SS-073	Trawl	267	311	124	152	127	131	258	270	166	186	319	355	244	252	234	254	140	140	197	217	116	120	0	0	0	0	103	115	187	191	136	136	260	260	363	367	348	368	346	346	191	193	173	173	220	222	160	160
HF15SS-075	Trawl	311	323	132	152	127	163	238	270	162	174	351	355	244	244	234	242	140	144	217	217	116	118	86	98	200	260	103	115	187	197	136	140	260	260	359	365	326	360	346	352	191	193	173	173	212	222	154	156
HF15SS-076	Trawl	299	335	124	148	131	187	238	250	130	154	343	347	224	232	226	238	140	144	229	237	118	118	94	110	188	204	121	121	181	195	146	148	210	280	359	359	320	360	346	346	191	193	173	173	222	222	156	156
HF15SS-077	Trawl	275	319	124	148	135	143	238	250	174	178	315	343	244	244	206	234	140	140	197	217	116	120	90	94	184	188	115	121	191	195	142	160	230	260	359	363	332	344	346	346	191	197	173	173	220	222	154	154
HF15SS-078	Trawl	303	303	124	152	143	143	238	246	154	194	359	359	224	244	222	234	140	140	233	233	118	118	90	90	172	172	121	121	187	187	140	144	260	260	359	359	372	372	346	362	193	197	173	173	220	222	156	158
HF15SS-079	Trawl	275	283	132	148	143	143	238	238	118	146	319	387	236	244	202	230	140	144	217	237	118	126	90	126	176	184	115	117	181	191	144	146	260	280	363	367	368	376	346	346	191	197	173	173	210	222	154	158
HF15SS-080	Trawl	303	307	140	164	131	143	238	254	186	190	343	371	236	249	206	230	140	140	213	233	118	118	90	134	168	192	115	121	187	195	118	146	240	250	359	359	348	352	346	360	197	197	173	173	222	226	152	156
HF15SS-081	Trawl	299	303	124	128	143	143	238	238	162	194	347	383	244	248	222	238	140	144	213	217	118	120	98	102	192	196	107	121	187	187	148	148	290	290	359	365	316	348	346	346	189	197	173	173	220	226	154	154
HF15SS-082	Trawl	283	299	144	148	131	183	246	258	154	154	351	367	224	244	238	246	140	140	213	213	122	122	86	94	188	252	115	115	187	189	142	146	230	230	363	367	356	372	346	360	197	197	173	173	212	222	152	172
HF15SS-083	Trawl	283	323	144	148	127	135	238	258	150	182	363	391	224	224	226	230	140	140	217	217	118	118	110	126	212	256	115	115	195	195	142	158	240	260	359	367	316	356	346	346	193	195	173	173	212	220	152	158
HF15SS-084	Trawl	291	307	124	152	131	183	238	246	182	194	315	335	224	224	246	258	140	140	217	233	122	126	90	94	184	204	103	115	187	195	134	146	230	290	363	363	336	356	346	360	193	193	173	175	222	222	154	156
HF15SS-085	Trawl	323	323	124	148	123	131	242	246	154	170	335	367	236	244	254	262	144	144	229	229	120	122	90	106	172	244	107	115	195	197	118	144	230	260	359	359	356	360	360	360	191	197	173	173	210	212	154	168
HF15SS-086	Trawl	251	283	124	128	159	187	238	262	186	190	319	335	244	244	226	230	140	140	213	217	116	122	94	126	184	188	115	115	187	187	142	164	230	280	359	363	352	360	346	352	197	197	173	173	220	222	154	156
HF15SS-087	Trawl	311	315	132	132	159	159	238	258	130	138	307	359	244	248	230	242	140	140	209	229	118	118	90	90	168	168	115	115	195	195	144	146	230	260	367	367	336	356	352	360	191	197	173	173	222	222	156	158
HF15SS-088	Trawl	283	311	124	124	123	127	234	242	162	178	323	367	224	224	238	246	140	144	233	233	120	120	90	98	176	192	115	121	187	211	136	142	210	260	359	365	332	344	346	360	191	197	173	177	210	222	156	156
HF15SS-089	Trawl	275	319	132	148	127	163	238	254	182	186	327	371	232	236	234	238	140	140	213	217	118	118	90	90	184	200	103	103	193	195	134	142	210	260	359	367	360	372	346	346	191	195	173	173	220	222	152	154
HF15SS-090	Trawl	255	275	124	136	127	167	242	266	122	194	307	355	236	244	222	238	140	144	213	229	118	118	90	90	192	200	115	121	191	197	134	136	260	280	359	359	340	364	346	352	191	197	173	173	220	222	154	156
HF15SS-091	Trawl	279	299	144	148	127	183	254	262	166	170	343	355	236	236	206	234	144	144	229	233	116	118	102	114	172	172	115	121	191	197	134	160	260	260	359	363	340	360	346	360	193	195	173	173	0	0	154	156
HF15SS-092	Trawl	275	275	124	124	127	127	242	250	162	178	311	359	224	224	246	250	140	140	221	233	118	120	90	102	188	256	103	121	195	197	118	136	210	250	359	359	352	360	352	360	195	195	173	175	222	222	152	156
HF15SS-093	Trawl	271	275	148	152	163	179	250	258	170	210	331	343	224	224	218	222	140	140	225	233	112	118	90	90	176	200	103	115	195	197	140	164	260	260	359	365	340	372	352	352	191	195	173	173	220	222	154	158
HF15SS-094	Trawl	331	355	132	148	143	163	242	262	158	182	315	319	224	224	222	230	140	140	217	229	118	120	130	130	184	236	121	121	189	197	140	142	260	290	359	359	372	380	346	352	0	0	173	175	220	222	156	168
HF15SS-095	Trawl	263	315	132	152	127	135	238	246	146	166	327	383	232	236	226	230	140	144	217	237	116	120	122	122	184	200	115	115	181	197	142	160	260	290	363	363	336	360	346	360	191	193	173	173	222	222	156	168
HF15SS-096	Trawl	259	299	124	132	131	143	238	258	150	154	351	359	240	244	230	230	140	140	217	233	118	122	86	90	172	228	115	115	187	191	142	144	260	370	360	363	336	364	346	356	193	193	173	173	210	222	156	158
HF15SS-097	Trawl	0	0	124	132	135	183	0	0	0	0	0	0	224	224	222	230	140	140	0	0	116	118	0	0	168	200	115	115	181	187	134	160	250	290	363	363	0	0	0	0	191	197	173	173	220	222	154	170
HF15SS-098	Trawl	299	339	132	148	131	163	238	254	162	202	327	339	244	244	226	230	140	144	213	217	118	122	90	90	168	252	103	121	193	197	140	160	240	260	359	363	356	366	346	346	191	193	173	173	222	222	154	156
HF15SS-099	Trawl	287	295	132	152	163	175	238	258	154	190	355	379	224	252	234	238	140	144	213	217	118	122	90	122	172	176	115	115	187	197	0	0	210	230	359	367	356	364	346	360	191	197	173	173	222	222	156	156
HF15SS-100	Trawl	287	311	148	168	167	183	238	238	154	198	323	339	232	244	222	238	140	144	201	217	116	120	90	122	168	204	103	115	181	197	144	160	260	260	363	363	368	376	346	352	197	197	173	173	220	220	156	158
HF15SS-101	Trawl	315	347	124	124	131	179	238	254	150	230	347	347	224	232	222	230	140	144	217	225	118	118	90	90	168	188	121	123	181	195	146	146	230	260	359	363	352	360	346	346	191	195	173	173	220	222	152	156
HF15SS-102	Trawl	275	275	164	164	135	187	238	238	170	174	315	371	224	232	222	222	140	144	213	225	120	120	98	114	172	256	117	121	187	197	144	148	240	250	363	363	360	372	346	346	191	191	173	175	216	222	154	154
HF15SS-103	Trawl	299	319	124	132	135	139	238	258	182	210	343	387	236	244	238	254	140	140	217	217	118	120	98	114	204	260	115	115	183	187	140	142	210	230	359	363	332	352	346	360	195	197	173	181	222	222	154	156
HF15SS-104	Trawl	287	303	152	164	143	163	246	258	130	166	303	351	232	244	234	242	140	144	213	245	116	118	90	94	184	192	107	121	181	217	118	146	290	360	359	359	340	352	346	346	193	197	173	173	220	220	156	156
HF15SS-105	Trawl	271	299	124	148	127	131	242	258	130	198	343	355	224	244	202	238	140	140	0	0	118	118	90	90	180	208	121	123	191	199	134	142	260	360	359	359	348	364	346	346	197	197	173	173	212	220	154	158
HF15SS-106	Trawl	275	291	148	152	143	143	238	246	142	178	315	351	224	236	238	242	140	144	209	225	118	118	90	90	184	248	103	115	193	197	144	160	230	260	359	365	336	356	346	352	191	193	173	173	220	222	154	168
HF15SS-107	Trawl	303	323	128	148	131	171	238	246	154	170	335	367	224	245	226	262	140	140	217	229	120	122	94	126	184	248	115	115	181	195	144	148	230	260	359	363	356	360	346	360	193	197	173	173	210	212	154	168
HF15SS-108	Trawl	303	323	124	148	131	171	242	246	154	170	347	367	224	245	226	238	144	144	217	229	118	120	94	126	172	244	107	115	187	197	144	148	230	260	359	359	0	0	346	346	191	197	173	179	212	222	154	172
HF15SS-109	Trawl	283	303	124	148	123	127	234	242	154	178	335	367	224	244	254	262	144	144	213	217	120	122	90	106	184	248	107	115	187	197	118	144	230	260	359	360	318	360	346	360	193	197	173	179	210	212	154	168
HF15SS-110	Trawl	279	331	124	152	135	135	242	250	186	206	319	355	236	252	222	242	140	144	217	229	118	118	0	0	188	192	115	121	193	197	140	146	210	240	367	367	352	364	346	346	195	195	173	173	0	0	154	156
HF15SS-111	Trawl	275	347	148	148	131	163	238	246	150	190	327	343	224	244	218	226	140	140	217	229	116	120	94	98	172	240	115	121	181	191	134	144	260	260	359	363	344	356	346	346	191	197	173	173	220	222	156	172
HF15SS-112	Trawl	263	319	132	164	135	135	246	266	186	210	315	327	224	232	206	230	140	144	221	243	116	120	90	146	176	192	115	121	191	195	146	146	230	280	363	363	340	356	346	360	197	197	168	173	222	222	158	168
HF15SS-113	Trawl	291	315	124	152	127	131	238	286	162	186	335	343	224	248	230	234	140	140	201	217	120	120	0	0	172	176	115	119	191	197	148	158	250	250	363	367	340	368	346	346	191	191	173	173	222	222	156	160
HF15SS-115	Trawl	279	331	124	152	147	147	242	246	150	210	351	367	224	252	246	254	140	142	221	229	116	118	94	118	168	176	115	115	193	199	140	148	280	290	363	365	336	344	346	360	191	193	173	173	222	222	156	168
HF15SS-116	Trawl	295	315	132	152	143	163	238	242	182	190	355	391	224	244	234	238	144	144	213	225	118	120	90	126	168	176	115	121	181	197	142	146	230	230	359	359	336	344	346	360	0	0	173	173	222	226	156	168
HF15SS-117	Trawl	267	275	148	164	127	135	238	242	162	174	307	375	236	236	250	250	144	144	213	217	116	116	90	114	168	168	115	123	193	197	140	142	230	260	361	363	340	360	346	360	191	197	173	175	220	222	154	170
HF15SS-118	Trawl	291	331	124	152	127	143	246	258	134	150	339	347	224	244	238	250	140	140	217	217	116	118	66	66	180	228	115	121	193	199	140	146	230	240	363	367	340	340	348	352	191	193	173	175	212	212	156	170
HF15SS-119	Trawl	287	335	152	164	139	195	238	238	174	178	319	331	224	244	234	238	140	140	217	229	116	118	90	126	196	252	115	115	191	191	142	164	210	250	363	365	332	336	0	0	191	195	173	173	220	222	154	156
HF15SS-120	Trawl	331	355	132	148	139	163	242	242	170	182	315	355	224	249	206	234	140	144	213	225	116	120	86	130	176	184	103	121	189	197	140	148	260	290	359	359	372	372	346	360	191	197	173	173	220	220	154	156
HF15SS-121	Trawl	275	303	132	148	127	159	254	270	154	178	299	363	244	249	238	238	140	144	0	0	116	118	0	0	200	260	103	103	181	193	146	146	240	290	359	367	0	0	0	0	195	197	173	173	0	0	154	156
HF15SS-122	Trawl	279	351	124	148	135	143	238	238	146	178	331	335	232	244	234	234	140	140	213	253	116	116	102	114	172	232	115	121	195	197	142	160	260	300	359	359	336	356	346	360	195	197	173	173	210	222	154	156
HF15SS-124	Trawl	275	343	148	148	127	143	242	258	186	198	375	379	224	240	242	254	140	140	217	217	118	118	98	126	188	196	115	115	181	187	118	148	260	280	359	371	324	336	360	360	191	193	173	173	222	222	154	154
HF15SS-125	Trawl	307	311	124	132	127	171	246	250	154	154	339	371	224	224	234	254	140	140	213	217	116	118	0	0	0	0	0	0	0	0	0	0	0	0	359	363	364	372	344	346	193	197	173	173	222	222	150	160
HF15SS-126	Trawl	299	311	124	148	123	143	238	246	150	158	351	387	224	236	226	242	140	140	217	217	118	122	90	110	168	176	103	115	189	191	146	148	250	290	359	363	364	372	346	348	193	195	173	173	222	222	154	156
HF15SS-127	Trawl	307	339	132	132	143	179	238	258	158	186	323	387	224	249	246	250	140	140	201	213	118	120	102	134	212	216	115	121	187	197	134	136	210	280	359	359	340	364	346	348	191	195	173	173	212	222	154	156
HF15SS-128	Trawl	275	295	124	124	135	143	238	238	146	162	347	347	224	232	234	242	140	140	217	225	118	120	86	90	172	252	115	121	191	195	118	146	290	360	359	359	348	372	346	360	195	197	173	173	220	222	174	176
HF15SS-129	Trawl	287	311	124	148	131	139	246	258	142	186	327	363	232	260	234	254	144	144	217	251	118	120	90	134	172	176	115	115	187	197	134	136	290	360	359	363	0	0	0	0	193	197	173	173	0	0	156	168
HF15SS-130	Trawl	275	303	124	132	127	147	238	238	134	138	315	351	236	236	230	258	140	144	213	225	116	120	90	102	200	212	115	121	187	197	138	160	280	360	359	359	328	340	352	360	193	197	173	175	222	222	154	156
HF15SS-131	Trawl	303	323	124	132	135	147	238	258	130	142	399	399	236	244	234	234	144	144	217	229	0	0	66	66	172	216	115	115	181	191	148	154	210	280	359	363	368	368	346	346	193	197	168	173	222	222	154	158
HF15SS-132	Trawl	331	355	124	132	143	159	262	270	158	182	315	319	224	224	222	230	140	140	213	229	116	120	86	130	176	184	103	121	181	195	140	148	290	360	359	363	364	380	0	0	191	195	173	175	220	222	156	168
HF15SS-133	Trawl	295	319	124	124	127	179	238	242	178	206	319	335	236	244	206	230	140	140	197	213	118	126	90	90	184	256	115	115	181	187	118	142	210	260	359	363	358	360	346	360	195	199	173	173	222	226	154	154
HF15SS-134	Trawl	275	311	124	152	143	159	238	246	162	202	351	363	224	236	238	242	140	140	217	221	122	122	90	94	172	208	107	115	189	189	146	164	210	280	359	367	354	360	346	360	191	197	173	173	220	220	154	154
HF15SS-135	Trawl	299	311	128	136	131	143	242	270	174	198	351	371	224	249	218	234	140	140	229	229	118	122	90	94	168	200	121	121	187	199	134	160	210	290	359	363	340	380	346	346	193	197	173	173	220	220	156	158
HF15SS-136	Trawl	303	311	152	164	131	143	238	246	166	194	347	363	224	248	234	238	140	140	217	229	112	112	90	110	192	204	115	115	191	197	134	148	210	360	363	365	332	368	346	352	193	197	173	175	222	224	152	156
HF15SS-137	Trawl	295	303	132	148	127	143	258	270	154	206	347	351	224	244	230	246	140	144	217	233	116	118	90	102	192	260	121	121	187	187	134	142	240	260	359	359	0	0	0	0	191	193	0	0	0	0	154	174
HF15SS-138	Trawl	311	315	148	160	123	143	238	250	150	186	331	331	236	248	230	234	140	144	217	221	118	120	86	94	184	200	115	121	193	197	142	146	240	290	360	363	332	344	346	352	197	197	173	173	210	220	156	156
HF15SS-140	Trawl	255	287	124	164	127	163	238	242	198	210	343	351	244	249	234	234	140	140	213	221	118	118	90	90	188	196	107	121	191	195	144	146	260	370	359	365	352	364	346	346	195	201	173	173	210	222	156	156
HF15SS-141	Trawl	279	299	124	124	135	167	262	266	150	154	343	355	236	244	214	226	142	144	197	245	118	118	98	122	208	248	115	119	193	197	142	146	210	250	359	363	356	360	346	346	191	193	173	173	220	220	156	156
HF15SS-142	Trawl	303	319	124	164	123	139	242	246	158	190	351	391	224	236	234	254	140	142	217	233	118	120	110	122	168	200	103	103	187	193	140	150	250	260	359	359	368	380	346	346	199	199	173	173	220	222	156	168
HF15SS-143	Trawl	271	307	132	148	143	147	238	242	150	202	339	399	232	232	218	258	140	140	209	237	118	122	90	90	180	192	115	121	197	197	140	142	230	260	359	365	330	364	346	346	191	191	173	173	220	220	156	156
HF15SS-144	Trawl	295	331	132	152	127	183	258	270	150	170	315	347	224	248	242	262	140	144	225	241	118	126	90	90	192	200	107	121	193	197	140	160	210	260	363	365	336	356	346	346	191	195	173	175	212	220	156	170
HF15SS-145	Trawl	283	303	132	132	143	147	254	254	182	186	303	315	224	249	234	234	144	144	217	217	118	120	90	110	184	184	103	121	191	197	118	140	300	360	363	367	0	0	0	0	191	197	0	0	0	0	154	158
HF15SS-146	Trawl	0	0	124	132	143	143	238	246	186	194	343	355	216	252	238	250	140	144	213	233	118	120	98	110	188	200	103	121	181	193	146	146	210	230	359	359	356	364	346	346	191	195	173	173	222	226	156	156
HF15SS-147	Trawl	275	283	152	160	127	147	250	254	150	154	347	371	232	232	230	250	144	144	229	229	120	122	90	102	172	184	103	115	195	217	144	164	230	230	359	367	336	368	346	346	191	193	173	173	220	222	154	156
HF15SS-148	Trawl	287	291	124	136	143	143	246	250	138	138	343	355	224	252	234	254	140	140	217	217	116	118	98	130	196	240	103	103	191	193	118	142	210	210	359	359	316	336	346	346	191	201	173	173	210	222	154	158
HF15SS-149	Trawl	283	299	124	132	127	143	258	258	150	218	343	367	232	244	234	238	140	144	213	233	116	118	90	90	184	200	115	121	181	187	144	144	210	240	359	359	336	356	346	352	193	201	173	173	222	222	154	156
HF15SS-150	Trawl	279	299	152	152	131	163	238	250	126	166	327	359	244	248	250	250	140	140	229	249	118	118	90	98	176	200	103	121	181	195	146	146	260	260	363	365	360	364	346	346	191	191	173	173	214	222	154	154
HF15SS-151	Trawl	271	279	124	168	163	183	238	238	186	186	339	343	248	252	238	254	140	144	217	237	112	120	94	102	176	188	115	121	181	187	140	160	290	360	359	365	368	372	346	352	191	197	173	175	222	222	156	168
HF15SS-152	Trawl	0	0	132	148	131	147	258	258	0	0	0	0	224	232	250	250	140	140	0	0	118	118	0	0	168	176	121	121	189	191	134	140	0	0	363	363	316	320	346	346	193	193	173	173	210	222	168	174
HF15SS-154	Trawl	299	335	124	148	131	183	238	258	154	186	327	351	232	244	238	258	144	146	221	237	118	122	90	90	188	196	115	115	181	195	140	160	210	260	359	363	360	360	346	346	191	193	173	173	222	222	154	156
HF16SS-001	Trawl	283	315	124	152	131	167	258	258	122	154	347	359	244	244	206	226	140	144	217	229	118	118	90	138	176	192	115	115	195	195	144	160	260	260	359	365	320	362	0	0	191	197	0	0	0	0	154	174
HF16SS-002	Trawl	275	311	148	152	143	155	238	266	138	190	355	359	224	236	226	242	140	140	217	235	116	118	114	126	192	196	103	115	187	197	144	146	240	260	363	367	326	356	346	360	193	197	173	173	220	222	152	156
HF16SS-003	Trawl	267	283	132	164	155	183	238	270	122	162	355	359	236	244	222	238	140	140	219	237	118	118	90	90	168	172	115	119	193	197	118	142	260	260	359	363	336	340	346	346	193	197	173	173	222	222	154	156
HF16SS-004	Trawl	287	291	132	148	131	143	238	254	166	178	327	331	228	236	234	250	140	140	225	229	118	118	66	90	192	200	115	121	193	197	142	160	210	250	363	363	340	344	346	346	191	191	175	175	222	222	156	160
HF16SS-005	Trawl	303	303	140	152	127	167	250	254	162	162	335	363	236	240	230	230	140	144	213	233	118	118	66	90	192	200	121	121	181	181	142	146	210	260	359	365	358	364	346	360	191	201	173	173	222	222	154	156
HF16SS-006	Trawl	267	299	124	148	143	199	238	250	182	210	327	371	236	244	214	230	140	140	205	229	118	120	90	106	248	256	121	121	187	197	142	142	260	260	365	367	360	364	346	346	193	197	173	173	220	222	154	168
HF16SS-007	Trawl	267	275	148	148	159	167	238	238	150	166	355	379	232	236	218	238	140	146	209	217	118	118	90	122	192	212	121	121	181	189	142	146	260	280	0	0	336	336	346	346	0	0	173	179	210	222	0	0
HF16SS-008	Trawl	275	303	148	148	135	159	246	258	142	170	331	343	244	244	234	242	140	140	217	221	116	120	90	90	180	188	115	115	193	195	142	146	260	260	365	365	336	364	346	360	193	193	173	177	222	222	156	172
HF16SS-009	Trawl	287	319	124	132	147	155	250	270	154	166	331	355	224	244	234	242	140	144	205	237	118	120	94	114	200	244	103	115	193	197	142	148	250	260	359	359	348	368	346	360	197	197	173	183	220	222	154	156
HF16SS-011	Trawl	283	335	124	160	131	143	238	246	166	210	351	371	224	240	234	250	144	144	217	221	118	118	90	98	188	208	115	121	187	191	142	144	250	260	359	365	360	372	346	346	191	197	173	173	222	222	154	156
HF16SS-012	Trawl	275	291	132	148	163	163	242	250	142	182	323	339	236	252	230	242	140	146	217	227	118	120	114	114	168	168	115	121	195	197	140	142	250	290	365	365	322	336	346	352	0	0	173	173	222	222	156	168
HF16SS-013	Trawl	299	323	148	164	135	143	238	242	174	178	335	363	224	232	206	206	140	140	217	217	118	120	90	130	192	204	115	121	193	199	158	158	260	260	359	359	344	352	346	346	191	197	173	173	222	222	156	160
HF16SS-014	Trawl	287	295	128	148	127	167	238	250	138	166	339	363	240	244	246	254	140	140	201	205	116	118	90	102	168	192	115	115	191	193	136	148	250	260	359	359	324	376	346	360	191	197	173	175	212	222	158	172
HF16SS-015	Trawl	291	311	132	148	135	195	242	282	150	198	351	355	224	248	234	234	140	140	217	217	118	120	86	130	168	204	115	115	181	197	146	160	210	250	363	365	0	0	0	0	191	197	173	173	0	0	154	158
HF16SS-016	Trawl	279	295	124	152	155	163	242	266	142	142	343	363	244	244	218	254	140	144	213	217	118	122	90	98	168	192	103	121	195	217	144	160	250	250	359	363	326	356	346	360	191	193	173	175	220	220	152	158
HF16SS-017	Trawl	295	339	132	136	127	143	242	258	174	178	339	347	224	244	222	234	140	144	217	217	116	118	114	122	204	228	115	121	193	195	134	164	260	290	363	367	344	356	348	360	197	197	173	177	210	220	156	156
HF16SS-018	Trawl	287	307	124	152	131	163	242	246	150	170	331	343	220	224	242	254	140	140	217	225	118	118	94	126	180	204	103	115	193	197	146	146	210	290	359	365	336	336	346	346	197	197	173	175	218	220	154	172
HF16SS-019	Trawl	275	287	132	148	143	163	238	246	174	182	307	343	244	252	206	254	140	140	225	233	118	120	102	134	200	200	103	115	191	197	118	136	280	290	363	363	348	372	352	360	197	197	173	173	220	222	154	156
HF16SS-020	Trawl	267	287	124	132	135	139	242	262	178	186	331	359	232	236	206	246	140	144	213	213	118	118	90	90	200	228	115	121	197	197	118	134	260	370	359	363	356	364	346	346	197	197	173	173	220	222	154	156
HF16SS-021	Trawl	283	295	124	128	131	139	242	242	146	194	307	359	236	244	230	242	140	144	203	229	116	118	114	118	184	188	115	115	181	197	144	146	210	290	365	365	336	360	346	346	191	193	173	173	222	222	156	156
HF16SS-022	Trawl	287	319	148	152	127	183	250	266	182	194	351	355	236	244	226	254	140	144	213	249	118	118	90	126	196	200	115	115	191	217	134	142	230	260	359	363	340	360	346	360	191	197	173	173	222	222	154	160
HF16SS-023	Trawl	299	323	128	152	127	171	238	258	166	170	331	359	216	224	234	238	140	146	217	233	116	118	90	90	172	188	115	115	181	181	140	146	210	260	359	363	332	356	346	352	191	197	173	173	220	222	154	154
HF16SS-024	Trawl	303	311	124	132	131	135	238	238	154	206	343	371	224	232	222	238	140	140	203	217	118	118	94	114	168	188	115	121	181	197	134	160	250	290	363	363	336	360	346	346	191	197	173	173	222	222	154	156
HF16SS-025	Trawl	303	359	124	128	127	131	238	246	186	190	347	379	224	244	234	250	140	144	217	237	116	116	86	90	188	200	103	121	187	193	118	144	210	260	359	367	324	372	346	346	197	201	173	173	222	222	154	156
HF16SS-026	Trawl	323	327	124	132	131	135	238	238	154	174	319	323	232	244	242	254	140	140	209	241	120	120	90	102	184	200	115	121	187	197	118	140	260	360	363	365	324	352	346	360	197	197	173	177	222	226	156	156
HF16SS-027	Trawl	295	331	124	152	131	163	238	254	162	170	311	355	244	249	226	238	140	140	213	221	118	118	86	98	172	188	115	117	181	195	142	160	210	240	359	359	372	380	346	352	193	197	177	179	220	222	156	170
HF16SS-028	Trawl	267	291	132	152	131	131	258	262	134	158	315	331	240	244	238	242	140	144	213	241	118	118	94	106	176	200	115	115	181	181	118	142	260	260	359	367	320	364	348	360	191	197	173	175	220	220	156	160
HF16SS-029	Trawl	295	311	136	152	131	139	238	242	126	178	339	363	236	252	238	242	144	144	229	229	118	118	114	114	172	220	107	115	187	197	118	142	260	280	359	359	364	364	346	360	191	193	173	173	222	222	154	168
HF16SS-030	Trawl	295	299	124	148	127	159	238	238	154	162	347	371	232	236	234	246	140	140	217	225	118	118	86	90	176	176	103	115	181	183	142	148	260	290	363	363	328	356	346	346	191	197	173	173	212	220	156	156
HF16SS-031	Trawl	303	319	128	148	131	139	238	238	178	186	359	363	236	244	238	258	144	146	203	217	118	120	94	134	176	196	115	115	181	197	146	148	260	260	359	365	336	348	346	346	191	193	173	173	222	222	154	154
HF16SS-032	Trawl	295	311	124	148	127	139	238	246	174	174	351	363	224	236	254	254	140	140	217	217	118	118	90	130	188	192	115	121	195	197	142	146	230	240	359	363	316	348	346	352	195	197	173	173	220	222	152	160
HF16SS-033	Trawl	311	315	164	168	131	131	250	258	166	182	339	371	232	236	234	238	140	140	217	225	118	118	0	0	0	0	0	0	0	0	0	0	0	0	359	359	340	344	346	360	191	195	173	173	210	220	156	174
HF16SS-034	Trawl	299	311	132	148	135	139	250	254	158	166	327	359	224	228	226	230	140	140	221	225	118	118	90	110	176	192	115	115	181	187	146	146	260	280	359	363	328	364	346	348	193	197	173	173	220	220	154	168
HF16SS-035	Trawl	295	327	148	164	135	147	238	258	166	174	327	355	224	244	218	222	142	144	213	213	118	120	90	90	168	204	103	115	181	187	140	142	260	260	359	359	356	368	346	352	197	201	173	175	220	226	154	158
HF16SS-036	Trawl	299	339	148	164	135	167	258	270	186	186	299	343	224	236	218	226	140	144	217	217	118	120	94	102	184	188	115	115	191	197	146	160	260	260	359	359	330	364	346	346	191	191	173	173	220	226	156	156
HF16SS-037	Trawl	263	331	136	148	131	143	238	262	162	178	303	347	224	249	242	250	140	144	225	229	118	120	90	90	196	208	115	115	181	197	146	146	230	260	359	365	364	368	346	346	191	197	173	173	220	222	154	168
HF16SS-039	Trawl	275	299	144	164	143	191	238	238	174	182	339	391	232	236	234	238	140	140	221	221	118	118	90	90	168	220	103	115	181	197	134	160	260	260	359	365	340	364	346	346	197	197	175	175	222	226	156	156
HF16SS-040	Trawl	279	299	148	156	123	167	238	258	138	186	339	367	224	244	226	234	144	144	209	213	112	112	90	90	176	196	107	115	187	195	140	146	210	260	365	367	336	360	346	346	191	197	173	173	222	222	154	170
HF16SS-041	Trawl	271	283	124	156	143	167	242	246	154	170	331	351	224	249	234	234	144	144	213	221	118	118	90	102	176	192	115	123	197	197	118	140	230	360	359	363	322	348	360	360	197	201	173	173	220	222	154	156
HF16SS-042	Trawl	287	315	124	128	131	143	254	258	158	182	327	343	228	236	234	250	140	140	0	0	0	0	90	90	188	188	115	115	181	187	142	142	240	290	359	359	340	364	346	346	193	197	168	173	212	222	154	156
HF16SS-043	Trawl	287	307	148	148	135	143	238	246	158	162	339	359	224	248	238	250	140	144	209	217	118	118	90	94	184	192	103	115	187	195	118	136	260	360	359	363	344	366	352	360	195	201	173	173	220	222	154	168
HF16SS-044	Trawl	259	275	132	136	131	195	246	282	134	186	359	387	244	249	242	250	140	144	217	225	118	118	86	90	168	188	103	115	193	195	148	160	210	260	359	367	324	328	346	360	191	197	173	173	212	220	168	172
HF16SS-045	Trawl	283	295	124	124	127	171	238	270	154	162	311	315	236	244	234	238	140	144	237	241	116	118	82	94	168	204	103	115	181	181	146	148	250	290	359	363	332	356	346	346	197	197	173	173	220	226	156	156
HF16SS-046	Trawl	259	295	132	136	127	131	238	246	134	186	387	407	224	236	238	254	140	144	217	233	118	120	86	102	188	228	115	115	191	197	134	160	260	260	359	359	324	340	352	360	191	197	173	173	222	222	152	154
HF16SS-047	Trawl	275	315	124	148	147	187	238	238	142	178	331	359	232	244	222	230	140	140	197	203	118	118	94	102	200	256	103	121	195	197	118	134	260	260	363	365	328	340	360	360	195	201	173	173	220	222	156	156
HF16SS-048	Trawl	303	311	132	152	127	131	238	246	126	150	343	407	224	232	238	254	140	144	213	221	118	120	90	94	188	200	115	115	181	191	134	142	260	290	359	359	332	364	352	360	193	195	173	173	220	220	154	158
HF16SS-049	Trawl	291	343	124	132	143	163	250	258	158	170	335	403	236	248	238	250	140	140	213	229	118	120	90	102	184	188	115	123	187	187	146	148	260	280	363	363	326	360	346	346	191	197	173	173	222	222	160	160
HF16SS-050	Trawl	275	315	124	132	123	163	250	254	154	166	335	355	232	236	234	234	140	144	217	221	118	120	90	94	168	188	107	115	191	197	138	146	210	250	363	367	320	332	346	346	193	197	173	173	222	222	154	156
HF16SS-051	Trawl	275	299	132	148	131	163	250	266	126	154	339	355	224	244	234	254	140	140	213	229	118	118	90	94	172	200	109	115	195	197	142	160	250	250	359	365	348	360	346	352	191	193	173	177	222	226	156	158
HF16SS-052	Trawl	279	315	124	136	119	127	238	278	122	206	339	351	224	244	210	238	140	140	209	209	0	0	86	90	172	200	107	115	193	217	146	146	210	280	359	359	368	376	352	360	193	195	173	173	210	220	154	156
HF16SS-053	Trawl	307	315	136	136	131	187	258	258	170	190	307	343	224	240	226	258	140	140	233	253	120	120	90	118	164	228	121	121	187	193	142	146	260	260	359	359	336	360	346	346	193	193	173	175	212	220	154	154
HF16SS-054	Trawl	287	295	124	148	139	139	250	258	154	206	339	343	244	249	226	242	140	140	197	233	0	0	90	90	192	200	115	115	195	217	138	146	250	370	363	365	320	352	346	360	191	193	173	173	222	226	138	158
HF16SS-055	Trawl	267	283	132	148	127	135	238	258	142	178	323	363	224	236	234	238	140	140	217	241	112	120	90	94	172	208	107	115	187	193	146	146	210	230	359	359	328	360	346	346	193	197	173	175	220	220	150	154
HF16SS-056	Trawl	275	287	132	152	127	163	250	254	170	174	323	343	240	244	230	238	140	144	213	217	118	118	90	102	168	188	103	115	193	195	142	142	230	280	359	359	332	356	346	360	193	197	173	173	220	226	154	156
HF16SS-057	Trawl	275	315	132	148	127	131	238	258	170	170	331	355	232	248	242	258	140	140	213	233	112	118	118	126	176	184	115	121	187	197	134	148	250	300	359	359	352	368	346	360	193	193	173	173	212	222	154	156
HF16SS-058	Trawl	279	299	128	132	143	143	238	250	138	142	319	339	244	252	238	246	140	140	219	229	116	120	90	118	172	248	103	103	193	195	140	146	260	260	359	359	324	360	346	360	193	195	173	173	220	222	156	176
HF16SS-059	Trawl	267	283	0	0	159	159	0	0	138	138	0	0	224	224	250	250	140	140	0	0	118	118	62	90	164	192	115	115	181	191	122	164	260	370	359	359	364	364	0	0	199	199	173	173	220	220	138	154
HF16SS-060	Trawl	263	303	132	132	163	183	262	266	162	198	359	379	232	240	218	230	140	140	213	233	118	118	98	106	176	192	103	115	181	181	118	136	250	250	363	363	340	364	346	360	193	197	173	177	220	220	156	156
HF16SS-061	Trawl	279	323	140	148	127	127	242	246	118	170	351	355	224	232	230	242	140	140	209	209	118	118	66	94	192	200	121	121	181	197	148	160	250	260	359	363	364	372	346	360	191	203	173	173	212	222	168	170
HF16SS-062	Trawl	303	323	152	152	135	187	250	254	158	194	347	355	224	244	234	250	140	140	213	229	118	118	90	94	176	184	115	115	189	191	146	146	260	280	359	363	368	380	346	346	197	197	173	173	220	226	150	158
HF16SS-063	Trawl	291	335	148	148	123	139	250	258	154	190	351	351	224	236	202	234	140	144	0	0	118	118	0	0	0	0	0	0	0	0	0	0	0	0	359	363	320	344	346	360	197	197	173	173	220	222	158	160
HF16SS-064	Trawl	283	323	132	132	147	187	250	258	178	182	319	359	224	232	242	246	140	140	225	251	118	118	90	94	200	200	103	115	187	191	160	164	230	260	359	359	364	372	346	352	191	197	173	173	220	222	156	156
HF16SS-066	Trawl	295	299	128	156	139	143	242	250	154	174	347	351	236	249	210	234	144	144	0	0	0	0	90	94	184	220	107	123	191	217	144	146	230	260	359	367	322	340	346	346	197	197	173	173	220	220	156	160
HF16SS-068	Trawl	303	315	136	152	139	143	242	266	122	154	367	383	236	248	226	246	140	140	209	217	118	118	90	90	188	200	121	121	187	193	134	148	290	290	359	367	368	372	346	346	195	197	173	173	222	222	154	168
HF16SS-069	Trawl	279	295	148	152	135	143	242	274	122	194	367	371	232	244	218	222	144	144	213	229	118	118	90	118	192	248	115	115	191	195	134	140	210	260	359	363	356	360	346	352	191	191	173	175	220	222	154	156
HF16SS-070	Trawl	275	287	124	156	155	167	238	258	154	202	343	359	244	249	242	254	140	140	217	221	118	118	90	134	172	192	115	115	195	197	118	160	230	260	359	359	364	364	346	346	193	193	173	175	210	220	154	156
HF16SS-071	Trawl	287	291	148	152	131	143	238	250	146	154	367	371	232	252	234	254	140	146	217	229	118	118	90	90	172	176	115	121	187	217	138	142	230	250	363	367	352	364	346	346	193	195	173	173	220	222	154	172
HF16SS-072	Trawl	291	295	148	164	131	163	238	258	158	166	327	339	232	244	238	250	140	144	217	217	112	122	90	90	176	200	121	121	187	197	160	160	260	260	359	359	336	340	346	346	191	197	173	173	220	220	154	154
HF16SS-073	Trawl	275	295	132	136	163	163	258	270	170	210	307	339	249	249	246	250	140	144	209	217	118	120	90	90	168	176	121	121	193	197	142	160	230	250	363	365	340	356	346	346	197	197	173	173	220	222	154	168
HF16SS-074	Trawl	311	311	132	148	123	187	250	258	150	154	335	355	224	236	238	246	140	140	217	237	118	120	90	90	176	208	115	115	187	187	140	142	210	240	359	363	336	348	346	346	193	197	173	173	210	220	156	156
HF16SS-075	Trawl	275	279	124	152	127	183	242	246	166	174	343	359	224	232	206	234	140	140	209	221	120	120	90	122	172	200	121	121	195	197	134	140	250	260	363	367	336	364	346	346	191	191	173	173	222	222	154	168
HF16SS-076	Trawl	287	295	148	152	135	163	238	262	142	222	279	363	244	244	226	226	140	140	217	217	112	120	90	90	180	200	115	121	195	197	142	160	230	250	359	367	336	360	352	360	191	193	173	173	210	222	154	156
HF16SS-077	Trawl	303	323	128	136	131	171	238	238	166	210	335	335	224	252	202	238	140	144	237	237	116	122	90	90	196	196	115	115	191	217	138	146	230	370	359	365	322	360	346	346	195	195	173	173	220	222	154	154
HF16SS-078	Trawl	311	327	132	156	143	143	238	242	186	186	363	363	244	244	226	250	140	144	225	245	118	122	90	114	172	200	107	121	181	193	144	148	250	260	363	365	324	372	346	346	197	197	173	173	220	222	156	156
HF16SS-079	Trawl	287	287	124	168	167	171	238	250	138	154	319	363	224	232	234	246	140	140	217	217	118	118	90	90	164	168	115	115	189	191	118	142	260	290	363	367	356	358	346	346	197	197	173	173	220	222	156	156
HF16SS-080	Trawl	275	351	124	152	143	171	238	250	142	162	355	355	232	244	234	242	140	140	197	217	120	120	98	110	176	256	103	115	181	195	138	140	260	360	359	367	320	336	352	360	193	197	173	173	220	222	154	156
HF16SS-081	Trawl	271	275	124	148	135	155	250	266	178	210	335	363	240	244	238	238	140	144	221	221	112	120	90	98	176	200	115	121	197	197	144	164	260	260	359	367	356	360	346	360	191	197	173	173	222	222	154	168
HF16SS-082	Trawl	275	279	136	152	127	143	238	250	150	182	315	379	232	244	234	242	140	144	213	217	116	122	94	102	200	204	107	115	191	197	148	148	250	260	359	363	324	336	346	346	197	201	173	173	220	222	154	156
HF16SS-083	Trawl	275	331	148	156	131	159	238	274	186	198	311	355	249	252	234	250	140	140	225	225	120	122	90	90	192	200	103	115	187	189	142	148	210	260	359	359	336	352	344	346	195	197	173	173	220	222	152	158
HF16SS-084	Trawl	287	315	124	132	131	143	246	250	174	182	347	355	232	244	234	250	140	140	209	237	118	118	90	90	184	188	115	121	187	217	144	148	260	260	359	367	336	340	346	360	191	197	173	173	220	222	154	156
HF16SS-085	Trawl	299	307	124	132	143	143	238	258	138	174	359	391	224	244	222	242	140	140	217	237	116	116	110	114	200	272	103	121	187	195	142	164	260	260	359	359	332	352	346	346	191	193	173	173	220	222	156	156
HF16SS-086	Trawl	287	299	132	152	127	163	238	238	126	178	387	407	232	249	234	254	140	140	217	237	0	0	90	94	176	188	121	121	197	197	134	146	250	260	359	363	324	364	346	346	195	197	173	173	222	222	156	156
HF16SS-087	Trawl	291	303	124	132	127	131	238	246	170	170	307	363	244	249	238	238	144	144	217	221	118	118	90	126	184	188	115	121	181	195	134	148	210	260	367	367	360	372	346	346	191	191	173	173	220	220	152	158
HF16SS-088	Trawl	303	343	124	136	131	187	242	266	190	202	343	403	224	249	238	242	140	140	197	197	120	122	90	102	188	208	103	115	187	193	140	148	210	250	363	367	336	360	346	360	197	197	173	173	222	222	154	154
HF16SS-089	Trawl	299	323	124	148	131	171	242	246	166	218	351	431	232	244	234	234	140	144	213	233	118	118	94	102	176	176	103	115	181	197	136	164	260	280	363	365	322	368	346	360	193	201	173	173	222	222	156	156
HF16SS-090	Trawl	291	303	132	148	163	167	238	246	162	182	315	319	249	252	214	254	140	140	217	225	118	118	0	0	0	0	0	0	0	0	0	0	0	0	359	359	328	368	346	360	191	191	173	173	220	222	156	156
HF16SS-091	Trawl	259	287	152	164	167	199	238	250	150	154	319	359	232	248	250	250	144	144	209	241	118	120	94	94	176	176	103	115	187	195	134	146	230	360	367	367	332	368	346	346	191	197	173	173	220	222	156	156
HF16SS-092	Trawl	291	303	136	156	131	143	238	258	138	170	319	403	224	244	234	250	140	144	213	229	118	120	90	102	188	208	121	121	187	217	142	148	250	260	363	363	0	0	352	360	195	195	175	177	222	222	154	160
HF16SS-093	Trawl	275	283	96	124	135	183	242	254	154	158	323	399	244	252	242	250	140	144	221	229	116	120	0	0	0	0	0	0	0	0	140	146	0	0	359	359	336	368	346	346	193	193	173	175	220	220	154	160
HF16SS-094	Trawl	275	275	132	148	127	159	238	258	170	174	351	371	224	236	234	242	140	144	217	237	118	118	94	102	180	184	115	115	183	187	134	158	280	360	359	363	324	368	346	346	197	197	173	173	222	226	154	156
HF16SS-095	Trawl	311	347	144	144	135	139	238	238	170	186	347	371	0	0	0	0	0	0	0	0	0	0	90	134	168	200	103	115	191	197	140	142	250	260	359	363	324	368	346	352	193	197	173	173	220	222	150	156
HF16SS-097	Trawl	295	315	152	168	147	167	238	242	146	166	279	355	224	224	218	250	140	144	213	221	118	120	90	118	192	212	107	115	181	181	146	148	260	260	359	363	340	360	346	360	193	193	173	173	220	222	156	170
HF16SS-098	Trawl	315	343	152	152	127	131	242	294	158	206	363	363	232	244	246	246	140	140	219	229	118	118	94	94	172	216	103	121	193	201	146	148	260	280	359	363	364	364	346	346	197	197	173	173	210	222	152	154
HF16SS-099	Trawl	311	315	128	132	123	131	238	250	174	186	335	363	240	244	234	246	144	144	209	233	118	118	90	90	184	228	115	121	181	217	142	148	210	260	359	367	340	340	360	360	193	193	173	173	216	220	154	156
HF16SS-100	Trawl	275	303	96	124	143	159	238	250	0	0	351	359	224	252	0	0	140	140	0	0	118	118	86	94	188	200	103	121	187	197	140	158	290	290	359	365	340	372	346	352	191	197	173	175	212	222	154	174
HF16SS-101	Trawl	283	295	124	132	131	167	250	258	162	174	315	355	232	244	234	250	140	140	0	0	0	0	98	122	188	224	103	121	181	187	144	146	260	260	363	367	316	332	0	0	191	197	173	175	0	0	154	156
HF16SS-102	Trawl	303	303	140	156	131	171	250	258	130	138	351	395	232	244	230	238	140	140	217	233	118	118	90	94	172	172	121	123	191	193	142	160	210	260	363	363	352	358	346	346	197	197	173	175	212	222	156	158
HF16SS-103	Trawl	299	299	124	156	127	143	246	250	166	182	339	343	236	244	218	234	140	140	217	233	118	120	94	110	180	236	115	121	189	191	134	140	260	280	359	359	332	372	346	346	191	199	173	173	222	224	158	168
HF16SS-104	Trawl	275	303	124	144	131	195	246	250	154	174	319	351	224	244	230	234	140	140	209	213	118	122	90	94	172	208	115	121	189	197	146	160	230	250	359	359	368	372	346	352	193	197	173	173	220	226	154	156
HF16SS-105	Trawl	295	299	132	132	127	131	238	242	174	178	335	367	232	244	238	254	140	140	217	221	116	120	90	90	196	200	115	121	191	195	134	146	240	360	363	367	332	376	346	346	193	197	173	177	222	222	154	156
HF16SS-106	Trawl	279	291	124	152	163	187	238	258	122	194	315	359	244	244	234	242	140	140	217	221	118	118	90	94	164	176	103	121	195	195	134	142	210	260	363	365	364	368	346	346	191	197	173	173	216	226	156	156
HF16SS-107	Trawl	275	299	148	152	131	143	238	242	146	190	323	331	224	232	234	234	140	144	229	233	118	118	90	90	188	200	121	121	181	195	144	146	280	360	359	363	336	340	346	346	191	197	173	175	220	220	152	162
HF16SS-108	Trawl	295	315	124	124	127	195	242	250	154	178	311	363	224	236	234	254	140	144	209	221	118	118	94	98	168	204	107	121	189	197	140	146	230	290	359	359	360	368	346	346	191	193	173	173	222	226	154	156
HF16SS-109	Trawl	283	319	124	124	127	143	238	270	170	170	343	351	224	244	230	234	140	144	213	221	118	120	90	90	188	200	109	115	181	195	136	160	250	260	359	359	0	0	0	0	197	197	173	173	0	0	154	154
HF16SS-111	Trawl	331	359	132	148	143	147	238	250	150	194	331	371	224	232	226	234	140	144	217	233	116	120	90	90	220	244	103	115	191	197	144	148	260	290	359	365	364	380	346	346	193	197	173	175	210	222	156	156
HF16SS-112	Trawl	275	283	132	148	127	147	242	246	146	178	311	339	236	244	234	246	144	144	229	229	118	118	94	94	204	248	115	121	197	197	140	146	260	360	363	363	356	360	346	346	193	195	173	173	222	222	156	160
HF16SS-113	Trawl	275	287	124	132	143	167	238	250	126	170	343	359	232	249	250	254	144	144	217	229	116	118	94	110	168	176	115	121	187	195	134	160	260	260	359	367	356	368	346	346	0	0	0	0	222	222	154	160
HF16SS-114	Trawl	295	299	124	124	131	135	238	266	166	194	315	327	224	232	210	262	140	140	213	221	118	118	90	90	168	200	115	121	193	193	134	146	230	260	367	367	360	364	346	346	193	195	173	175	222	222	152	156
HF16SS-115	Trawl	295	311	132	148	143	159	238	274	162	178	347	359	236	244	234	254	140	144	217	217	118	122	90	110	172	196	115	123	193	197	144	160	250	260	360	365	322	332	346	346	191	197	173	173	222	222	156	172
HF16SS-116	Trawl	283	299	124	152	127	131	246	250	130	170	343	363	236	244	210	238	144	144	221	229	118	120	86	90	172	188	103	121	181	181	134	138	230	250	359	367	344	360	346	346	197	197	173	173	220	220	156	158
HF16SS-117	Trawl	267	303	132	148	143	143	238	258	174	198	311	327	248	248	238	254	140	140	209	209	118	120	90	114	192	240	115	123	187	187	142	148	260	260	359	365	356	356	346	360	197	197	177	179	212	226	156	176
HF16SS-118	Trawl	275	275	132	164	131	143	258	266	142	190	343	387	236	244	202	238	140	144	209	217	118	118	86	94	172	192	121	123	193	197	148	148	210	260	363	365	332	332	360	360	197	197	173	173	222	222	152	154
HF16SS-119	Trawl	271	331	148	152	139	183	238	250	170	230	323	347	224	249	226	234	140	144	221	221	116	118	86	90	164	188	115	115	191	193	142	142	230	260	359	363	316	356	346	346	193	197	0	0	210	220	154	156
HF16SS-120	Trawl	291	315	148	148	127	135	238	246	130	186	335	363	224	249	230	242	140	144	233	237	120	122	90	90	172	192	115	115	195	217	146	146	230	230	363	363	352	384	346	346	191	193	173	175	214	222	154	154
HF16SS-121	Trawl	279	303	124	144	131	135	254	258	118	174	343	371	244	244	210	226	140	144	237	247	118	122	90	90	168	184	103	123	193	195	144	146	260	280	359	363	322	336	346	346	195	197	173	173	218	220	156	158
HF16SS-122	Trawl	275	331	124	148	143	143	238	238	142	194	315	331	232	232	222	222	140	146	197	203	118	118	94	94	192	200	103	121	187	195	118	134	260	260	363	363	328	340	346	360	195	195	173	173	220	226	156	156
HF16SS-123	Trawl	299	311	148	152	143	163	242	258	166	194	347	351	224	224	250	250	140	144	217	217	118	118	90	118	200	204	115	121	189	195	142	148	250	290	359	359	364	368	346	346	197	197	173	173	220	220	154	156
HF16SS-124	Trawl	267	267	124	148	143	167	238	238	178	186	355	355	224	224	222	234	140	144	217	233	118	120	90	110	172	192	107	121	195	197	134	148	260	360	359	360	336	340	346	360	193	197	173	173	222	222	156	156
HF16SS-125	Trawl	299	307	132	152	143	147	238	238	146	178	359	371	224	236	238	246	144	144	221	229	118	120	90	90	168	196	115	115	181	197	142	148	250	250	363	367	344	356	346	346	193	197	173	173	220	222	154	154
HF16SS-126	Trawl	275	295	132	148	127	143	238	262	186	194	351	407	224	232	226	254	140	140	217	233	118	120	94	110	188	188	121	121	181	197	134	146	260	290	359	359	336	348	346	352	193	195	173	173	220	222	152	158
HF16SS-127	Trawl	271	279	124	148	127	183	242	246	134	142	335	351	224	248	234	234	140	140	217	221	118	120	102	102	184	252	115	115	187	195	138	146	260	360	359	367	340	356	346	346	191	193	173	173	220	220	154	156
HF16SS-128	Trawl	279	295	128	168	135	143	258	258	154	174	343	359	236	236	226	238	140	140	213	217	116	120	90	102	184	188	103	115	195	195	136	144	260	290	363	367	332	366	346	346	193	197	173	173	220	226	154	156
HF16SS-129	Trawl	275	287	132	148	155	183	242	250	182	186	327	363	224	244	234	250	140	144	213	229	118	122	90	134	176	200	103	121	197	201	144	164	260	260	363	363	316	360	346	346	191	195	0	0	210	222	0	0
HF16SS-130	Trawl	287	307	124	152	127	167	246	262	186	202	331	351	236	244	0	0	140	144	217	217	118	120	90	94	188	196	115	121	195	197	158	160	260	290	359	363	332	364	346	346	191	193	173	173	220	222	156	170
HF16SS-131	Trawl	275	279	124	152	131	143	238	258	134	194	0	0	232	244	238	250	140	140	217	221	116	122	86	94	200	216	115	121	181	195	142	146	210	250	363	367	340	364	346	360	195	197	173	173	218	222	152	152
HF16SS-132	Trawl	283	307	124	136	131	163	258	270	142	182	323	351	236	244	222	234	140	140	217	219	116	118	90	94	196	228	115	115	191	193	118	144	230	290	363	365	360	380	346	360	191	193	173	175	222	222	138	156
HF16SS-133	Trawl	295	295	144	148	127	147	238	262	178	186	363	375	236	249	0	0	140	140	217	233	116	118	90	114	168	184	115	123	187	191	118	140	260	280	359	363	320	328	346	346	191	191	173	173	222	226	150	156
HF16SS-134	Trawl	275	287	124	148	127	131	250	250	142	178	311	359	236	253	222	250	140	144	219	225	118	122	90	98	200	200	103	115	193	195	136	160	210	290	363	367	344	344	346	360	197	201	173	175	220	222	156	168
HF16SS-135	Trawl	299	311	124	148	139	163	242	270	170	186	347	351	224	224	226	230	140	144	213	229	116	118	90	90	180	192	103	121	189	193	146	160	210	250	359	359	344	360	346	346	193	193	173	173	220	226	154	156
HF16SS-136	Trawl	287	299	124	132	131	139	238	258	154	182	343	359	224	228	214	238	140	140	217	237	118	118	66	90	184	196	103	115	195	217	144	146	250	290	359	359	328	340	346	360	191	191	0	0	220	222	156	162
HF16SS-137	Trawl	295	295	152	164	135	163	238	258	166	194	347	399	244	248	226	238	140	144	217	227	118	118	86	126	176	176	115	123	195	197	142	144	210	230	363	363	356	372	346	346	191	193	173	173	220	220	154	156
HF16SS-138	Trawl	287	307	124	152	127	143	238	246	114	198	335	379	244	249	226	242	140	144	217	237	118	120	90	90	184	216	107	115	193	195	118	158	240	250	359	367	360	372	346	352	0	0	0	0	210	210	152	162
HF16SS-139	Trawl	275	287	132	148	135	167	238	250	138	162	347	355	224	244	242	250	140	140	213	229	118	118	90	90	196	204	115	115	193	217	118	142	290	360	360	360	340	368	346	360	191	191	173	175	220	222	154	172
HF16SS-140	Trawl	267	299	132	148	127	135	238	238	158	194	343	359	236	249	230	234	140	144	213	217	118	120	90	110	168	196	115	121	195	195	118	148	250	260	359	363	322	356	346	352	191	193	173	173	220	222	156	158
HF16SS-141	Trawl	287	319	124	132	131	147	242	242	150	198	319	331	224	236	230	258	140	140	213	225	116	120	90	114	192	220	115	121	195	195	142	146	250	250	359	363	364	364	346	360	195	197	173	175	220	222	158	158
HF16SS-142	Trawl	299	315	132	148	127	191	238	250	154	182	327	399	236	236	238	246	140	140	229	235	118	118	90	130	192	200	115	123	181	193	134	142	250	250	359	367	332	356	346	346	191	197	168	173	222	222	156	156
HF16SS-143	Trawl	251	275	128	148	131	139	250	258	118	202	339	359	224	248	242	258	140	140	213	217	0	0	90	110	240	240	115	115	189	195	142	142	260	260	363	365	316	356	346	346	193	193	173	177	222	222	154	160
HF16SS-144	Trawl	279	287	132	164	143	187	238	258	146	190	355	359	224	244	226	234	140	140	221	237	118	118	86	102	220	252	121	121	197	197	142	158	260	260	359	363	340	364	346	360	195	197	173	173	220	226	156	158
HF16SS-145	Trawl	299	299	148	152	139	147	238	242	182	186	339	351	224	232	230	234	140	144	213	233	118	118	90	130	168	208	103	103	187	199	142	142	260	290	359	363	336	364	346	352	193	197	173	173	220	222	156	160
HF16SS-146	Trawl	303	331	148	152	131	135	242	242	154	214	279	363	224	240	234	250	140	144	213	225	118	118	90	90	184	196	109	121	191	197	134	134	290	290	359	359	340	352	346	346	191	191	173	173	222	222	156	168
HF16SS-148	Trawl	287	295	136	148	127	139	238	242	166	186	339	351	224	224	242	254	140	140	229	233	0	0	90	126	184	204	103	115	187	193	118	146	230	360	363	365	322	326	346	360	197	197	173	173	220	222	168	172
HF16SS-150	Trawl	291	291	124	148	127	167	250	270	146	150	327	359	249	249	226	246	140	144	221	229	118	126	94	94	168	184	115	115	181	187	142	164	230	230	359	367	320	326	346	352	193	197	173	173	220	222	156	168
HF16SS-153	Trawl	275	351	132	152	131	195	242	254	174	174	319	387	224	244	242	254	140	140	217	249	118	122	90	94	188	192	121	123	189	193	134	142	210	250	359	367	326	336	346	346	197	201	173	173	222	222	152	156
HF16SS-154	Trawl	271	303	132	152	143	143	246	246	158	186	347	371	224	244	234	250	140	140	213	225	116	122	94	102	184	248	115	121	183	191	134	142	230	250	359	363	344	368	346	346	193	197	173	175	222	222	156	166
HF16SS-159	Trawl	0	0	128	132	167	183	238	238	146	174	0	0	236	244	238	250	140	140	0	0	0	0	90	102	192	240	107	121	181	197	134	164	230	260	359	363	332	364	346	360	191	197	175	179	222	222	154	160
HF16SS-169	Trawl	279	299	152	164	135	159	238	246	122	186	351	351	224	236	214	238	140	140	217	225	118	122	90	138	172	184	115	115	183	195	142	146	260	260	361	363	324	340	360	360	191	193	173	173	220	222	154	156
HF16SS-170	Trawl	279	287	124	152	135	183	242	254	146	166	355	371	224	236	234	254	140	140	217	217	118	118	94	114	168	224	115	123	181	195	142	146	240	250	359	363	322	332	346	346	191	197	173	173	212	222	152	154
HF16SS-171	Trawl	283	311	124	132	131	159	246	254	150	190	327	331	244	252	234	246	140	140	217	225	118	118	90	122	172	224	103	115	181	197	140	148	250	290	359	359	336	344	346	346	195	197	173	175	220	222	154	170
HF16SS-172	Trawl	299	311	144	152	131	167	258	262	126	178	319	331	232	249	206	250	140	144	221	237	116	122	90	102	188	196	103	103	191	197	142	144	250	260	359	363	0	0	0	0	191	193	0	0	0	0	152	156
HF16SS-173	Trawl	291	327	124	148	131	135	246	254	122	150	343	367	236	244	238	242	140	140	217	221	118	122	90	90	188	192	109	121	193	195	144	160	260	290	363	363	332	368	346	360	195	197	173	173	220	220	156	158
HF16SS-174	Trawl	283	319	164	164	131	139	238	246	150	182	339	363	224	232	206	254	140	146	213	217	116	118	90	130	192	236	115	121	193	195	144	158	260	260	359	363	344	372	346	360	193	195	173	173	220	222	154	156
HF16SS-175	Trawl	291	295	124	132	159	167	254	258	150	190	319	347	232	244	226	234	140	140	217	217	118	120	90	90	168	176	115	115	181	181	144	146	250	250	359	363	320	336	346	352	191	191	173	177	222	222	154	154
HF16SS-176	Trawl	275	299	124	152	159	167	238	250	170	178	355	367	212	244	242	250	140	144	221	221	118	118	94	114	176	224	103	121	177	197	118	142	210	250	363	363	340	350	346	352	191	197	173	173	222	222	154	156
HF16SS-177	Trawl	299	319	136	152	163	187	238	238	122	126	335	343	224	236	226	234	144	144	221	221	118	118	110	126	184	188	115	115	187	197	144	146	230	260	359	365	322	336	346	346	191	193	173	173	210	222	154	158
HF16SS-178	Trawl	275	299	132	152	183	195	238	270	154	158	335	351	224	244	214	222	140	140	203	225	118	118	94	114	188	260	103	103	191	193	142	146	230	250	363	367	340	376	346	346	197	197	173	173	222	224	154	156
HF16SS-179	Trawl	291	311	124	132	135	159	238	250	110	114	339	355	224	244	230	230	140	140	233	237	118	118	90	98	188	200	115	121	191	191	146	164	230	260	365	367	340	348	346	346	197	197	173	173	222	222	154	154
HF16SS-180	Trawl	279	323	132	144	147	163	238	258	166	194	319	327	240	244	218	234	140	140	213	217	118	122	90	90	176	188	103	115	193	195	138	140	210	260	359	365	312	312	0	0	195	195	0	0	0	0	152	156
HF16SS-181	Trawl	279	303	124	132	123	143	246	250	166	186	343	363	244	248	234	250	140	144	217	229	116	118	94	134	180	200	115	121	181	187	148	148	260	290	363	363	336	356	346	360	193	197	173	175	212	220	156	158
HF16SS-182	Trawl	275	279	128	128	127	163	238	270	114	178	311	331	224	244	226	242	140	144	217	225	0	0	90	94	172	204	115	121	197	217	146	164	210	250	359	359	336	336	346	346	197	197	173	173	210	218	154	154
HF16SS-183	Trawl	283	323	136	152	159	167	238	270	154	154	347	355	224	236	234	238	140	140	217	221	120	122	86	90	184	192	115	121	181	197	160	160	250	280	365	367	324	344	346	346	191	191	173	173	220	220	154	168
HF16SS-184	Trawl	287	295	148	148	127	143	242	250	154	190	323	331	224	224	222	254	140	140	213	217	118	118	90	106	168	196	115	121	181	195	146	146	260	280	359	359	356	368	346	346	197	197	173	173	220	222	154	156
HF16SS-201	Trawl	275	287	132	148	131	171	234	238	142	142	315	363	224	232	234	242	140	140	213	221	120	122	90	110	168	188	115	115	197	197	136	144	230	260	357	359	336	360	346	346	191	201	173	173	222	224	166	168
HF16SS-202	Trawl	287	327	148	164	135	147	238	246	174	198	323	347	224	236	238	250	140	144	203	237	118	118	0	0	0	0	0	0	193	195	144	144	240	250	359	363	364	364	346	346	191	197	173	173	210	220	154	160
HF16SS-203	Trawl	263	279	124	124	131	171	238	242	154	218	331	375	232	244	226	242	140	144	221	229	118	118	0	0	168	196	115	115	189	217	136	142	260	290	359	363	336	360	346	346	191	195	173	173	220	222	154	154
HF16SS-204	Trawl	295	335	132	164	127	147	242	250	166	178	299	311	224	236	222	242	140	140	225	233	116	122	0	0	180	192	115	115	195	195	118	140	230	280	357	359	336	344	346	352	191	197	173	173	212	222	154	172
HF16SS-206	Trawl	311	323	152	152	127	143	238	238	178	210	343	347	244	244	246	258	140	144	217	229	116	118	0	0	192	196	115	115	191	195	134	164	230	230	359	365	336	336	346	346	191	191	173	173	210	210	156	158
HF16SS-208	Trawl	267	275	124	152	135	147	258	266	182	186	339	367	224	236	238	246	140	140	233	233	118	118	0	0	168	188	0	0	187	195	136	146	250	260	363	365	328	368	346	346	191	197	173	177	220	220	154	168
HF16SS-209	Trawl	267	287	132	148	127	131	238	254	142	190	363	367	224	244	230	250	140	144	197	229	112	122	0	0	188	192	115	115	181	195	118	146	230	250	359	365	326	372	360	360	191	197	173	175	212	220	156	156
HF16SS-210	Trawl	279	359	136	168	139	163	238	242	154	214	355	367	224	252	234	242	140	140	213	217	116	118	0	0	0	0	121	121	191	193	136	142	240	290	359	360	336	364	346	360	191	197	173	173	222	222	158	160
HF16SS-211	Trawl	311	331	124	164	123	163	246	262	162	174	331	335	224	224	234	254	140	144	217	217	122	122	0	0	188	216	115	121	195	197	142	144	230	240	359	359	340	348	346	346	191	197	173	173	222	222	154	156
HF16SS-212	Trawl	295	335	132	148	123	127	246	254	178	182	287	371	224	236	206	238	140	144	221	233	118	118	0	0	192	192	121	121	195	201	118	118	230	280	359	363	316	368	346	352	197	197	173	173	210	220	156	160
HF16SS-222	Trawl	283	295	124	152	131	147	246	250	182	210	315	343	244	244	234	250	140	140	217	217	116	118	0	0	0	0	115	121	189	191	148	160	250	260	359	359	332	368	346	346	0	0	173	173	220	222	156	156
HF16SS-223	Trawl	287	331	148	152	131	167	238	238	162	194	307	335	224	236	218	254	140	140	217	217	118	118	0	0	0	0	115	121	193	195	140	148	290	360	359	367	364	372	346	360	193	195	173	173	220	222	156	170
HF16SS-225	Trawl	303	311	124	164	135	135	246	250	138	150	0	0	232	252	234	234	144	144	229	235	122	122	0	0	168	176	0	0	189	191	146	148	260	260	359	359	344	366	346	346	0	0	0	0	220	226	156	156
HF16SS-227	Trawl	259	271	136	148	155	187	242	270	130	190	323	327	224	224	226	226	144	144	217	229	112	120	0	0	184	196	103	121	181	195	144	164	260	360	363	365	336	356	346	352	189	191	173	173	220	220	154	156
HF16SS-228	Trawl	275	291	124	152	171	187	238	238	158	174	339	359	244	244	226	246	140	140	229	233	118	118	0	0	172	176	107	115	197	201	144	148	230	260	359	363	324	360	346	346	195	197	173	175	210	222	156	156
HF16SS-230	Trawl	299	303	124	136	127	143	238	262	122	178	339	347	232	244	222	250	140	140	219	253	118	118	0	0	0	0	103	115	195	217	118	144	260	260	359	359	336	366	346	346	197	197	173	173	216	222	154	156
HF16SS-232	Trawl	299	331	132	140	135	143	238	246	138	210	0	0	224	224	234	234	140	140	217	221	118	118	0	0	184	240	115	115	191	195	144	146	240	250	363	365	332	332	346	360	0	0	0	0	220	222	154	154
HF16SS-233	Trawl	283	299	124	124	127	127	238	242	130	162	355	359	224	224	238	246	140	144	225	235	126	126	0	0	168	204	115	115	181	195	140	140	230	260	359	363	324	364	346	360	191	193	173	173	210	220	154	154
HF16SS-235	Trawl	311	327	124	148	135	143	258	266	142	178	331	339	224	236	202	238	140	144	217	233	116	122	0	0	192	196	115	115	181	197	142	148	260	280	359	359	332	364	346	346	197	197	173	173	220	222	156	158
HF17SS-001	Trawl	275	299	128	148	143	187	238	266	122	174	327	331	224	240	230	234	144	144	213	221	118	122	90	90	184	208	115	115	181	193	160	164	260	290	359	363	322	332	346	352	191	197	173	175	220	222	154	158
HF17SS-002	Trawl	303	307	124	136	147	163	238	262	122	158	343	351	244	244	238	250	140	144	0	0	118	120	94	98	168	168	115	121	181	217	140	148	260	260	359	363	320	332	346	346	191	193	173	175	220	222	154	168
HF17SS-004	Trawl	279	283	124	148	143	163	0	0	130	186	315	331	224	249	0	0	140	144	0	0	118	118	90	114	168	196	121	121	193	199	138	146	260	290	363	365	322	364	346	348	191	195	173	173	222	226	156	158
HF17SS-005	Trawl	295	299	124	164	131	143	238	238	142	154	315	339	236	249	226	238	140	144	217	221	118	118	90	90	180	224	115	115	187	189	142	146	250	260	359	359	360	368	346	346	193	193	173	173	212	226	156	156
HF17SS-006	Trawl	0	0	148	164	127	143	0	0	182	186	0	0	224	232	0	0	140	140	0	0	120	120	90	90	176	192	103	115	193	197	140	140	260	260	0	0	0	0	346	346	197	197	173	173	220	222	154	174
HF17SS-007	Trawl	275	295	136	148	143	163	238	250	154	178	327	351	224	244	206	226	140	140	217	225	118	122	102	126	188	200	115	115	191	197	136	142	250	260	367	367	352	380	346	346	191	193	173	173	220	222	156	156
HF17SS-008	Trawl	283	287	148	152	131	139	238	238	138	162	323	371	232	236	206	206	140	140	217	237	118	120	90	90	188	196	121	121	189	197	142	160	360	360	363	363	372	372	360	360	195	199	173	173	222	222	156	168
HF17SS-009	Trawl	299	303	124	132	131	135	238	254	162	178	351	363	224	249	222	234	140	144	213	217	120	122	90	94	192	248	103	123	187	193	134	164	260	290	359	367	316	340	346	346	193	193	173	173	210	214	154	170
HF17SS-010	Trawl	259	295	152	168	127	131	238	270	162	186	347	351	224	232	238	242	140	144	217	229	116	118	114	126	172	196	115	121	197	197	140	148	210	240	359	363	336	344	346	360	197	197	173	173	222	222	156	168
HF17SS-011	Trawl	323	327	148	168	143	143	246	262	118	174	351	379	224	224	202	226	140	144	213	229	118	118	90	102	184	200	115	115	181	191	142	144	260	260	359	363	326	372	346	360	193	197	173	173	216	222	158	166
HF17SS-012	Trawl	279	307	124	132	127	135	0	0	162	174	0	0	224	236	0	0	140	144	0	0	116	120	102	114	168	200	115	121	181	193	148	158	210	280	0	0	340	360	344	346	193	193	173	177	210	222	156	156
HF17SS-014	Trawl	275	339	148	148	127	171	250	250	174	190	323	339	224	236	234	234	140	144	197	217	120	122	114	126	188	252	115	123	193	193	134	146	230	260	363	363	330	336	346	360	189	197	173	175	222	222	156	168
HF17SS-015	Trawl	279	295	124	148	143	147	238	266	162	186	315	399	224	244	226	246	140	140	213	229	118	118	94	98	176	212	115	115	191	217	140	142	260	260	363	365	320	376	346	360	191	191	173	175	220	222	156	160
HF17SS-016	Trawl	295	299	124	160	143	167	250	258	158	186	311	359	224	248	226	238	140	140	209	233	118	118	90	106	196	196	115	121	187	189	118	142	260	290	359	359	344	356	346	346	191	197	173	173	220	220	172	174
HF17SS-017	Trawl	267	299	152	164	127	143	242	242	150	174	359	375	224	244	222	242	140	140	217	241	118	118	90	118	188	196	123	123	193	195	140	148	250	280	363	363	324	336	346	360	195	197	173	173	222	222	156	158
HF17SS-018	Trawl	291	311	124	152	139	143	246	250	142	174	315	327	224	244	214	226	140	146	217	229	116	120	90	130	200	200	115	115	191	193	118	146	280	360	359	363	344	372	346	346	197	197	173	173	222	224	152	154
HF17SS-019	Trawl	291	307	124	148	127	127	246	250	138	182	311	311	236	240	230	242	140	140	213	225	118	120	114	126	168	204	121	121	181	181	134	146	250	280	359	365	368	372	346	346	193	197	173	177	220	222	154	156
HF17SS-020	Trawl	295	315	124	164	131	163	242	250	150	170	335	347	224	244	234	238	140	144	203	217	118	120	90	98	188	192	121	121	193	193	134	142	230	240	359	367	332	368	346	346	191	191	173	173	210	222	154	156
HF17SS-021	Trawl	279	331	124	132	147	159	242	250	150	162	347	355	236	244	222	230	140	140	0	0	118	118	90	90	168	180	121	123	187	197	148	160	230	280	359	363	340	360	346	360	191	193	173	177	210	222	156	158
HF17SS-022	Trawl	275	291	132	152	127	131	246	250	150	166	319	355	224	240	242	246	140	144	0	0	118	118	94	102	168	204	115	115	181	191	140	146	250	290	359	363	336	364	346	360	197	197	173	177	212	222	156	156
HF17SS-023	Trawl	275	291	124	152	119	127	242	254	154	194	323	335	224	244	246	254	140	140	209	225	116	120	90	90	188	200	115	121	195	197	134	148	210	260	359	359	360	368	346	360	197	197	173	175	222	226	154	156
HF17SS-024	Trawl	287	291	132	140	123	131	238	238	138	158	347	379	224	244	246	250	140	140	225	229	116	122	90	90	168	192	103	115	187	187	134	146	240	260	359	359	320	326	346	360	193	197	173	173	210	220	156	170
HF17SS-025	Trawl	299	299	124	136	139	187	242	270	138	150	319	359	224	240	222	234	140	144	217	225	118	118	90	102	168	188	115	115	181	197	118	146	210	250	359	359	322	372	346	346	191	197	173	173	220	222	152	160
HF17SS-026	Trawl	315	319	124	124	163	191	234	242	142	182	331	355	224	244	234	234	140	144	213	217	118	118	98	118	168	172	109	115	187	195	136	144	250	290	359	363	352	356	346	360	191	193	173	173	222	222	156	156
HF17SS-027	Trawl	311	315	164	164	131	143	238	270	0	0	355	355	224	249	226	230	140	146	213	213	118	118	94	98	168	192	107	115	181	187	136	146	260	260	359	363	344	368	346	346	193	197	173	173	220	220	154	156
HF17SS-028	Trawl	267	291	132	152	139	195	238	254	170	190	311	347	224	232	246	250	140	140	221	229	116	118	90	94	168	200	115	115	187	195	138	140	260	260	359	365	360	360	346	346	191	197	173	173	220	222	156	156
HF17SS-029	Trawl	311	331	128	152	139	143	242	262	138	202	319	351	232	244	210	250	144	144	0	0	116	118	94	114	176	188	115	115	181	195	140	144	230	260	359	367	368	368	346	346	197	197	173	173	222	222	152	156
HF17SS-031	Trawl	303	311	124	148	131	135	238	274	126	166	355	367	240	252	218	238	144	146	213	217	116	118	90	90	172	188	115	115	195	197	148	160	210	260	359	367	340	356	346	360	191	197	173	173	210	222	156	156
HF17SS-032	Trawl	0	0	132	132	135	187	0	0	142	158	0	0	224	236	0	0	144	144	0	0	116	118	0	0	184	260	115	121	191	195	146	160	260	290	0	0	344	348	346	346	191	193	173	173	222	222	154	154
HF17SS-033	Trawl	279	279	132	148	127	163	0	0	114	186	0	0	0	0	0	0	140	140	0	0	116	120	90	114	168	168	109	121	193	197	134	146	210	290	0	0	332	340	346	346	191	193	168	173	220	222	156	160
HF17SS-034	Trawl	283	311	148	152	127	143	250	258	126	182	319	375	0	0	0	0	0	0	0	0	0	0	90	90	188	196	103	115	187	197	140	148	260	260	359	363	348	356	0	0	195	197	173	173	0	0	154	154
HF17SS-035	Trawl	279	315	132	152	131	135	238	238	162	170	343	347	236	244	202	242	140	144	213	217	118	118	90	90	172	260	115	123	189	191	134	144	260	260	359	359	336	364	346	346	191	197	173	173	210	224	152	154
HF17SS-036	Trawl	299	307	144	152	147	163	238	250	166	198	307	339	236	244	226	238	140	144	221	229	116	118	94	126	200	200	115	115	181	193	140	146	230	260	363	365	340	348	346	360	191	197	173	173	212	212	152	172
HF17SS-037	Trawl	283	303	128	148	135	167	250	258	150	186	319	351	224	248	238	242	140	144	229	229	116	118	126	130	172	204	115	121	187	193	134	148	240	240	359	359	336	336	360	360	197	197	173	173	210	212	154	156
HF17SS-038	Trawl	295	295	124	148	127	167	0	0	182	194	0	0	224	249	0	0	144	146	0	0	118	118	90	94	196	200	103	123	191	197	118	150	260	260	0	0	332	368	346	346	191	193	173	173	212	222	154	154
HF17SS-039	Trawl	279	291	136	152	163	183	238	258	134	138	343	343	224	232	250	258	140	140	0	0	118	120	90	102	176	208	103	121	181	187	146	148	250	260	359	363	326	350	346	346	193	197	177	177	212	222	158	160
HF17SS-040	Trawl	267	283	132	132	131	183	238	238	178	182	331	339	224	232	234	238	140	140	217	229	118	122	90	114	196	252	103	121	191	195	146	146	240	250	363	367	348	356	346	346	191	197	173	173	220	222	158	170
HF17SS-041	Trawl	259	275	132	164	143	175	250	262	166	182	315	339	224	244	234	238	140	146	201	221	116	118	90	110	172	176	103	115	193	195	146	148	240	280	359	365	332	332	346	360	193	197	173	173	210	222	154	156
HF17SS-042	Trawl	283	295	132	148	143	143	250	258	122	150	315	367	240	249	238	242	140	144	213	213	116	122	90	90	180	184	115	121	187	199	144	146	260	290	359	367	340	352	346	360	193	193	173	173	220	220	154	154
HF17SS-043	Trawl	275	295	144	164	131	167	250	258	122	186	355	387	236	244	238	254	140	140	201	221	118	118	0	0	0	0	0	0	0	0	0	0	0	0	359	365	326	372	346	352	191	197	173	173	210	222	152	154
HF17SS-044	Trawl	263	275	128	132	127	143	246	270	130	194	343	363	224	244	226	238	140	144	0	0	118	120	90	94	168	188	103	115	181	187	142	146	230	260	365	367	336	372	346	346	193	197	173	173	222	222	154	160
HF17SS-045	Trawl	275	279	132	132	163	167	250	278	150	190	319	319	224	224	230	238	140	144	0	0	118	118	86	90	172	172	115	115	187	217	140	142	240	260	363	367	326	360	346	352	195	197	175	175	210	222	154	156
HF17SS-046	Trawl	299	319	124	128	131	143	246	250	166	174	347	367	224	232	234	238	140	140	213	217	118	120	90	134	184	192	115	115	181	195	144	146	260	360	359	365	320	364	346	346	191	197	173	173	220	222	154	156
HF17SS-047	Trawl	275	275	124	148	131	159	238	270	122	178	311	371	232	244	214	222	144	144	221	221	118	120	90	110	176	192	121	121	187	197	134	136	210	230	363	365	326	332	346	346	191	191	173	173	222	222	154	156
HF17SS-048	Trawl	255	319	132	160	143	183	242	258	114	162	355	371	224	224	230	234	140	140	217	233	118	120	90	98	176	184	115	115	181	217	142	148	210	250	359	365	320	368	346	346	193	197	173	173	220	222	156	156
HF17SS-049	Trawl	303	307	128	152	131	143	250	258	174	206	355	359	224	224	254	254	140	140	0	0	118	118	90	90	168	192	103	115	187	193	142	148	240	280	359	360	324	328	346	346	193	197	173	173	220	222	156	158
HF17SS-050	Trawl	0	0	148	152	143	143	0	0	154	198	315	331	244	244	218	230	140	140	0	0	0	0	106	130	220	256	115	115	187	187	146	148	290	290	359	367	332	360	346	360	191	197	173	173	220	220	154	158
HF17SS-053	Trawl	275	299	144	148	127	163	246	246	146	198	0	0	224	249	0	0	140	144	0	0	0	0	90	102	196	256	121	121	197	197	134	140	260	260	0	0	340	368	0	0	193	197	173	173	212	220	154	154
HF17SS-054	Trawl	279	303	124	124	143	195	0	0	150	162	0	0	236	244	230	234	144	146	0	0	118	120	90	90	168	212	103	115	181	191	134	144	250	290	0	0	348	356	346	360	197	197	173	173	220	222	152	156
HF17SS-055	Trawl	283	287	124	132	139	179	0	0	154	166	0	0	228	232	218	234	140	140	0	0	116	116	66	66	192	204	115	121	181	197	140	148	250	290	0	0	356	368	346	360	193	197	173	173	216	226	154	156
HF17SS-056	Trawl	307	327	124	148	131	159	238	242	126	162	319	367	236	240	202	218	144	144	209	217	118	118	90	98	168	240	115	115	181	195	142	144	210	240	365	367	340	344	346	346	193	197	173	175	222	222	156	174
HF17SS-057	Trawl	271	335	132	140	139	183	238	238	174	186	351	355	244	252	230	254	144	144	229	237	116	120	94	114	184	240	115	117	187	191	160	160	230	250	359	365	336	356	346	346	195	197	173	173	222	222	154	156
HF17SS-058	Trawl	0	0	144	152	159	171	238	238	194	194	0	0	224	244	202	226	140	140	0	0	0	0	86	90	228	240	115	115	181	181	118	160	260	280	359	365	336	360	346	352	193	195	173	175	220	222	156	172
HF17SS-059	Trawl	0	0	124	124	139	183	238	238	186	190	0	0	224	248	230	254	140	140	217	217	112	118	98	114	176	204	103	115	187	195	146	146	250	260	0	0	344	352	346	360	195	195	173	173	222	226	156	168
HF17SS-060	Trawl	271	275	124	152	143	143	0	0	150	186	311	351	228	244	218	246	144	144	197	213	116	120	94	98	172	192	109	121	187	193	146	164	260	260	360	363	340	352	346	346	195	197	173	173	220	226	156	156
HF17SS-061	Trawl	0	0	124	148	127	179	238	238	174	186	0	0	0	0	218	234	140	140	0	0	116	118	90	90	188	188	121	121	181	197	140	142	260	260	0	0	336	368	346	360	191	197	173	175	222	222	154	170
HF17SS-062	Trawl	287	323	132	148	131	143	238	242	122	146	331	339	224	249	214	254	140	144	217	229	116	118	90	134	172	196	115	121	191	191	140	144	260	260	359	363	336	340	346	346	191	197	173	173	210	220	156	156
HF17SS-063	Trawl	287	311	124	124	195	195	242	246	126	182	319	355	244	244	222	234	140	140	217	221	118	118	90	94	168	240	115	121	181	197	142	146	210	210	359	365	336	368	346	360	197	197	173	173	220	220	156	156
HF17SS-064	Trawl	299	315	124	124	127	143	238	266	146	198	319	347	224	252	234	238	140	144	203	229	118	118	102	106	188	196	115	138	197	199	140	140	210	240	359	359	372	372	346	346	193	197	173	173	212	220	156	156
HF17SS-066	Trawl	275	311	132	148	143	143	254	254	166	166	323	331	224	232	234	234	140	140	217	221	118	120	90	118	196	224	103	103	195	197	134	146	210	300	359	359	356	364	346	352	197	197	173	173	222	222	150	172
HF17SS-067	Trawl	295	299	152	152	143	147	238	242	186	186	315	371	232	232	238	246	140	140	213	225	120	122	78	98	188	188	115	121	181	187	118	118	230	260	367	367	348	360	346	346	191	195	173	173	220	222	156	158
HF17SS-068	Trawl	271	323	124	164	127	135	238	242	170	182	335	339	224	232	234	238	140	144	213	221	118	118	90	102	176	256	115	115	181	195	146	146	260	360	365	367	324	356	346	346	193	193	173	173	220	222	154	168
HF17SS-069	Trawl	287	291	148	152	127	131	238	282	194	198	311	331	224	228	238	246	140	144	217	217	118	118	90	126	168	240	107	115	195	197	134	146	250	250	359	365	364	368	346	346	191	197	173	173	220	220	156	158
HF17SS-070	Trawl	275	295	124	148	143	167	250	262	174	206	335	363	236	244	234	238	140	144	225	229	120	120	0	0	176	244	115	115	187	189	134	140	260	260	363	367	340	360	346	360	195	197	173	173	220	220	154	156
HF17SS-071	Trawl	267	323	124	128	127	139	242	266	150	202	307	347	224	232	218	234	140	144	217	229	118	118	90	118	200	204	103	121	181	193	136	146	260	260	359	363	360	368	346	346	193	197	173	173	220	222	154	156
HF17SS-072	Trawl	299	331	124	152	127	199	238	238	122	142	323	347	224	224	246	254	140	140	217	217	116	118	90	90	188	200	115	121	187	193	140	160	260	280	359	359	316	360	346	360	191	193	173	173	210	212	154	156
HF17SS-073	Trawl	303	319	124	128	127	127	242	246	114	170	331	371	244	249	222	234	140	140	225	229	116	118	94	98	176	188	121	123	195	197	148	164	210	260	359	367	336	360	346	346	193	197	173	173	222	222	156	160
HF17SS-074	Trawl	291	291	136	148	143	207	238	242	118	186	363	371	224	248	206	246	140	144	225	229	120	122	90	94	188	188	115	115	181	187	142	146	210	240	363	363	356	356	346	356	193	193	173	173	220	222	156	166
HF17SS-076	Trawl	287	335	124	132	127	167	242	250	146	154	339	395	244	249	238	242	140	140	197	229	118	120	0	0	184	188	115	119	181	193	118	142	210	280	363	365	320	356	346	346	191	197	173	175	220	222	156	156
HF17SS-077	Trawl	299	339	132	148	127	131	238	246	178	194	331	363	240	244	226	246	140	144	209	233	118	118	90	90	168	200	115	123	191	197	142	146	260	290	363	365	344	348	346	346	191	197	173	175	222	222	154	156
HF17SS-078	Trawl	299	335	152	152	135	143	238	254	118	130	307	351	244	248	230	238	140	140	213	237	118	118	90	102	184	200	115	121	181	187	144	150	260	290	363	365	344	356	346	348	193	197	173	173	210	220	156	156
HF17SS-079	Trawl	311	315	136	148	127	139	238	246	138	186	347	363	236	244	234	246	140	140	197	221	116	120	90	114	196	216	103	103	187	195	144	148	250	260	359	363	336	372	346	360	197	197	175	177	220	226	154	156
HF17SS-080	Trawl	275	303	132	132	143	167	238	266	126	186	319	347	232	244	226	238	140	140	221	229	122	122	82	130	172	236	115	119	181	187	140	146	210	260	363	367	336	372	346	360	191	193	173	173	210	222	168	172
HF17SS-081	Trawl	275	319	152	152	131	163	238	242	198	202	327	335	228	236	234	242	144	144	213	221	118	120	90	90	188	192	115	115	191	191	142	146	250	260	359	363	336	364	346	346	191	197	173	175	220	220	156	156
HF17SS-082	Trawl	267	295	124	124	127	135	250	250	142	174	335	351	244	244	206	242	140	144	203	217	118	118	82	126	196	220	115	121	195	197	144	144	210	280	359	363	340	356	346	346	193	193	173	175	210	220	154	156
HF17SS-083	Trawl	307	315	124	124	127	127	238	238	142	154	323	343	244	249	222	234	140	144	217	243	118	120	90	118	176	196	103	115	187	191	140	142	260	360	363	367	340	364	352	352	191	197	173	173	220	222	156	158
HF17SS-084	Trawl	311	323	132	164	127	139	254	258	154	198	331	343	224	224	234	254	140	144	233	233	118	122	90	90	196	200	115	115	189	197	118	164	230	260	359	360	360	368	346	346	191	191	173	173	222	222	158	158
HF17SS-085	Trawl	275	311	152	152	171	191	238	238	150	198	335	363	224	244	250	254	140	140	221	237	118	122	122	134	192	192	103	115	181	195	118	146	260	260	359	359	320	336	346	360	191	193	173	173	220	226	156	156
HF17SS-086	Trawl	259	299	124	152	135	183	250	254	138	142	335	371	224	224	234	254	140	144	213	221	118	120	90	106	176	188	115	121	187	217	144	148	260	290	363	363	336	372	356	360	197	197	173	173	212	222	172	174
HF17SS-089	Trawl	275	291	124	124	127	127	238	250	138	202	359	403	224	244	222	234	140	140	213	217	120	120	90	90	192	192	115	115	181	193	118	146	260	280	0	0	360	380	352	360	193	197	173	175	222	222	156	168
HF17SS-092	Trawl	319	335	164	164	131	131	238	266	150	182	355	355	248	248	226	238	140	140	221	221	118	118	90	126	176	176	115	121	193	197	142	142	240	260	359	359	336	372	346	360	193	193	173	175	220	222	154	160
HF17SS-094	Trawl	291	311	124	152	143	159	238	242	154	158	351	355	224	244	242	246	140	144	213	221	118	122	90	118	176	188	103	115	181	197	118	144	250	360	359	359	340	356	346	346	193	197	173	173	220	222	152	154
HF17SS-095	Trawl	299	323	132	144	135	139	238	238	150	190	323	347	224	260	242	262	140	140	203	229	120	122	82	90	168	192	115	121	193	197	134	134	230	260	363	363	348	368	346	346	191	197	173	173	222	222	154	158
HF17SS-096	Trawl	287	327	136	152	139	143	238	250	138	190	335	351	232	236	230	234	140	144	219	229	118	118	90	130	192	196	115	115	181	197	118	140	260	260	359	359	324	352	346	346	191	191	173	173	220	220	156	168
HF17SS-097	Trawl	287	315	124	124	135	159	254	270	126	154	355	359	244	244	222	238	144	144	229	241	116	120	90	90	208	244	115	115	181	181	136	144	240	260	360	359	356	360	360	360	0	0	173	173	220	222	0	0
HF17SS-098	Trawl	303	315	124	132	131	179	246	258	162	178	327	335	216	236	206	222	140	140	213	213	118	120	90	90	168	188	121	121	187	191	146	146	260	260	359	363	356	360	346	360	193	201	173	179	222	222	168	168
HF17SS-099	Trawl	267	299	124	152	143	167	238	262	166	194	319	347	224	244	234	254	140	142	217	225	118	120	0	0	172	212	103	121	195	201	118	164	240	260	359	365	366	380	346	346	197	197	173	173	212	222	156	176
HF17SS-100	Trawl	275	279	124	152	135	143	238	238	166	174	339	343	244	252	226	238	140	140	213	213	112	118	90	90	184	244	121	123	189	197	140	142	260	360	363	365	324	336	346	346	197	197	173	175	220	222	154	154
HF17SS-104	Trawl	319	323	128	132	127	167	238	266	182	186	319	331	0	0	0	0	0	0	0	0	0	0	82	94	188	200	103	115	191	197	142	146	230	360	363	365	0	0	346	352	193	197	173	175	210	222	154	156
HF17SS-105	Trawl	283	287	124	124	127	167	250	250	158	182	319	371	224	236	254	254	140	140	213	221	118	118	90	90	168	192	103	121	181	195	142	146	210	210	359	363	0	0	346	346	197	197	168	173	220	222	154	158
HF17SS-106	Trawl	279	331	124	124	143	155	238	246	174	194	315	315	224	224	214	254	140	140	0	0	118	118	0	0	176	196	121	121	193	199	142	148	240	260	359	359	328	328	346	346	191	197	173	173	220	222	156	156
HF17SS-107	Trawl	255	283	124	132	123	131	246	246	150	166	315	363	244	252	238	250	140	140	0	0	116	118	0	0	192	200	115	121	197	197	136	160	250	280	359	365	340	356	346	346	191	197	173	177	212	220	154	156
HF17SS-108	Trawl	279	327	148	152	127	135	250	254	118	182	343	355	224	249	246	258	140	140	217	233	118	122	86	86	184	188	115	121	181	191	118	140	260	290	363	363	348	364	346	360	191	195	173	175	222	222	154	154
HF17SS-109	Trawl	279	303	128	152	139	143	238	238	122	178	339	351	244	244	202	254	140	144	217	233	118	118	90	90	172	196	103	115	181	195	136	144	260	260	359	363	332	366	346	346	191	197	173	173	212	222	160	160
HF17SS-110	Trawl	275	279	124	132	143	171	238	250	166	218	339	363	232	236	230	238	140	144	197	229	118	122	90	130	168	192	103	121	195	195	140	144	240	260	359	359	322	326	346	352	191	197	173	173	220	222	156	170
HF17SS-111	Trawl	279	295	124	148	131	131	246	250	154	166	347	355	244	248	246	254	140	144	217	241	118	118	90	94	168	260	103	121	187	197	146	164	260	360	0	0	336	364	360	360	0	0	173	173	220	222	0	0
HF17SS-112	Trawl	307	343	124	140	131	135	250	258	154	158	343	347	224	248	234	238	140	140	233	233	118	120	90	94	176	188	115	121	195	197	134	164	260	360	359	363	0	0	346	360	195	197	173	173	212	220	154	154
HF17SS-113	Trawl	287	303	124	148	143	163	238	250	122	166	351	375	224	248	222	246	140	144	197	213	118	120	90	90	168	188	115	121	187	189	142	146	240	250	359	359	336	356	346	346	193	197	173	173	222	222	156	160
HF17SS-114	Trawl	279	307	148	148	127	135	238	242	138	194	327	351	224	248	242	242	140	144	225	241	106	116	102	126	168	172	107	115	193	197	144	148	240	290	363	367	322	356	360	360	193	201	173	175	210	222	154	158
HF17SS-115	Trawl	303	323	144	148	127	131	238	270	170	174	375	379	224	240	226	238	140	144	213	213	118	120	0	0	188	200	115	115	187	191	134	140	250	260	363	367	336	372	346	360	195	195	173	173	222	222	154	166
HF17SS-116	Trawl	287	311	148	152	147	159	238	266	130	194	323	355	224	244	202	242	140	140	217	217	118	118	86	90	172	240	115	115	181	197	118	146	230	290	359	363	360	364	346	352	193	195	173	173	220	222	156	172
HF17SS-118	Trawl	271	291	132	132	127	131	238	246	170	194	315	375	232	244	234	238	140	140	203	251	116	118	90	126	200	224	103	115	187	197	134	134	250	370	359	363	360	364	346	346	197	197	173	175	212	220	154	156
HF17SS-119	Trawl	299	323	132	148	147	183	238	242	170	182	319	355	244	244	218	226	140	140	221	225	118	118	90	94	168	204	115	115	195	197	136	142	230	260	359	363	0	0	346	346	193	197	173	173	220	222	154	156
HF17SS-120	Trawl	275	331	124	152	131	131	238	238	154	154	343	371	244	249	226	234	144	144	213	217	120	120	90	122	188	216	115	115	191	193	142	146	260	290	363	367	352	356	346	346	191	191	173	173	222	222	154	160
HF17SS-121	Trawl	295	311	148	152	179	183	258	258	190	206	311	331	236	244	222	242	140	140	229	229	118	120	90	94	172	220	121	121	187	195	134	134	280	290	359	359	364	372	360	360	191	197	174	174	220	222	138	156
HF17SS-122	Trawl	267	339	132	144	135	147	238	238	150	198	315	363	216	244	234	242	140	140	221	229	112	122	86	90	176	256	103	115	187	189	140	142	250	290	363	365	336	360	346	352	193	197	173	173	220	222	154	156
HF17SS-123	Trawl	295	295	124	128	127	143	246	250	126	146	287	319	224	244	234	246	144	144	213	217	120	124	90	90	168	168	115	115	195	197	146	148	210	260	359	367	364	368	346	346	197	197	173	173	212	220	150	154
HF17SS-124	Trawl	259	275	148	152	127	167	234	250	166	190	319	339	224	232	238	246	144	144	217	225	118	122	90	118	168	244	103	115	193	195	140	148	240	260	363	367	372	376	346	360	191	193	175	175	222	222	154	156
HF17SS-125	Trawl	255	263	124	152	127	127	258	266	154	166	315	327	232	232	234	246	140	144	217	225	118	118	90	134	168	176	107	115	181	195	134	142	260	280	359	359	0	0	346	346	195	197	173	175	210	220	160	168
HF17SS-126	Trawl	287	359	124	152	127	143	238	270	174	174	279	335	232	236	242	246	140	144	233	237	118	122	90	90	168	176	115	115	181	191	118	144	210	260	363	363	326	372	346	346	195	197	173	173	222	222	154	156
HF17SS-127	Trawl	259	295	132	164	143	167	242	258	122	162	355	387	244	249	234	238	140	144	201	217	116	118	90	90	172	192	121	123	187	191	160	160	210	250	365	367	322	376	346	352	191	197	173	173	210	220	154	154
HF17SS-128	Trawl	275	287	152	152	143	167	270	270	174	178	347	351	224	224	234	238	140	144	221	251	118	122	90	90	168	180	115	121	183	195	146	146	260	280	359	367	336	372	346	346	191	197	173	173	222	222	156	168
HF17SS-130	Trawl	291	311	124	148	127	131	242	270	122	170	351	371	236	244	234	238	140	140	217	221	118	118	90	90	196	204	103	115	191	195	146	160	260	290	359	365	356	356	346	346	191	197	173	173	222	222	156	158
HF17SS-133	Trawl	283	303	128	148	135	167	250	258	150	202	343	355	224	224	202	234	140	140	229	229	116	118	94	130	176	192	115	121	187	195	134	146	240	240	359	367	328	336	346	360	193	197	173	179	210	226	154	156
HF17SS-134	Trawl	319	323	148	152	131	167	242	246	118	190	339	343	224	252	230	238	140	140	213	229	118	122	86	90	184	188	103	115	189	195	118	142	290	290	363	365	0	0	360	360	197	197	173	173	220	220	154	158
HF17SS-135	Trawl	287	299	128	136	131	135	254	270	170	206	343	351	224	236	226	246	140	146	217	221	118	118	102	114	196	228	107	115	181	191	118	146	260	290	359	367	340	364	346	346	193	197	173	173	210	220	154	156
HF17SS-136	Trawl	259	287	148	152	127	183	238	246	130	154	303	359	224	236	226	242	144	144	217	229	122	122	90	102	184	248	103	115	191	199	142	142	240	260	363	367	364	364	346	346	191	193	173	173	220	222	154	156
HF17SS-137	Trawl	279	339	124	168	131	143	278	282	166	174	347	375	240	249	222	226	140	144	217	217	118	120	90	114	172	200	103	103	181	191	146	160	260	360	360	367	340	364	346	360	193	197	173	173	222	226	156	156
HF17SS-138	Trawl	275	303	124	148	131	143	238	258	158	170	327	335	224	248	222	238	140	140	201	225	116	120	90	134	188	196	109	115	195	199	118	144	230	260	359	371	340	364	346	346	195	195	173	173	222	222	138	152
HF17SS-139	Trawl	283	311	124	148	127	135	238	246	178	218	331	335	224	240	234	250	140	144	217	233	118	122	90	90	200	200	103	121	191	197	134	144	230	260	359	363	324	340	346	352	191	197	173	173	220	222	156	156
HF17SS-141	Trawl	263	275	124	148	127	135	242	242	118	222	335	339	232	249	214	230	140	140	213	221	118	118	90	94	172	200	119	121	195	203	118	126	210	290	359	367	332	344	346	346	189	201	173	173	210	222	154	154
HF17SS-142	Trawl	307	311	124	132	127	131	246	250	186	194	331	347	232	244	242	254	140	144	217	227	118	118	0	0	176	188	103	103	187	189	134	144	230	290	359	363	332	364	346	352	193	197	173	173	222	222	156	160
HF17SS-143	Trawl	327	331	128	136	127	171	238	238	166	166	371	391	224	244	230	238	144	144	213	217	120	122	90	114	172	180	115	115	195	217	144	148	230	360	359	363	356	360	346	346	197	197	173	173	220	222	154	154
HF17SS-145	Trawl	275	279	124	132	143	187	238	242	122	198	331	359	244	244	234	242	140	144	229	233	118	122	90	90	168	200	103	115	187	195	140	142	210	290	359	361	360	364	352	360	191	197	173	173	222	222	154	156
HF17SS-146	Trawl	315	339	124	148	127	131	246	254	154	182	343	355	224	232	218	222	140	140	201	243	118	118	90	90	176	196	109	115	181	189	118	142	260	260	367	367	326	368	346	380	191	197	173	173	220	222	154	158
HF17SS-147	Trawl	279	287	132	152	127	171	238	242	130	130	343	347	224	252	242	242	140	140	217	225	118	122	90	90	184	192	103	115	197	217	134	148	260	260	363	363	332	352	346	346	191	193	173	173	218	220	154	154
HF17SS-148	Trawl	279	291	124	148	135	143	238	250	122	186	355	371	244	244	222	234	140	144	217	225	118	118	90	94	192	232	103	115	187	195	146	148	260	290	359	365	336	364	346	346	193	195	173	173	222	226	154	156
HF17SS-149	Trawl	267	307	144	152	143	167	238	242	174	198	343	351	244	252	234	234	140	144	213	221	118	118	90	90	196	224	103	121	193	197	142	164	230	290	359	363	356	368	346	352	191	193	173	173	212	220	156	156
HF17SS-150	Trawl	299	299	132	132	127	131	238	238	170	194	319	379	224	244	226	254	140	140	213	221	118	122	90	102	180	200	115	115	181	181	142	146	230	290	359	359	0	0	352	352	197	197	173	175	222	226	154	156
HF17SS-151	Trawl	275	291	136	148	163	175	246	246	158	186	323	331	224	236	242	250	140	140	217	221	116	120	90	90	184	224	103	115	187	191	140	140	260	290	367	367	360	360	346	346	195	197	173	173	220	222	154	154
HF17SS-152	Trawl	295	307	132	132	131	135	238	258	166	186	363	367	224	248	218	230	144	144	213	229	118	120	90	90	188	200	115	121	187	191	118	138	260	280	359	365	320	340	346	348	191	197	175	175	212	222	156	168
HF17SS-154	Trawl	267	275	124	128	143	183	246	274	130	154	355	363	248	252	218	238	140	140	229	233	120	122	90	90	192	224	103	115	181	197	142	146	230	230	359	367	326	372	346	346	197	197	173	173	222	222	156	156
HF17SS-155	Trawl	283	331	132	144	131	195	238	246	170	194	351	355	224	249	230	230	140	146	221	229	116	118	114	130	168	168	115	115	191	197	138	148	260	260	365	367	344	364	346	346	191	193	173	173	212	222	156	156
HF17SS-156	Trawl	287	291	128	132	147	167	250	254	162	190	0	0	0	0	214	222	144	144	0	0	0	0	90	122	168	224	103	121	191	197	142	146	290	290	0	0	0	0	0	0	191	195	173	173	0	0	154	166
HF17SS-157	Trawl	259	259	136	148	143	147	238	246	178	194	335	359	244	252	238	246	140	144	213	229	118	118	90	94	184	204	107	117	187	197	136	140	230	260	359	363	332	352	346	346	191	197	173	173	220	220	154	168
HF17SS-158	Trawl	299	307	132	148	127	135	246	250	170	174	351	359	232	236	246	254	140	140	221	225	118	118	90	94	168	256	115	117	187	191	118	134	240	250	363	365	320	328	346	352	193	197	173	173	220	222	156	156
HF17SS-159	Trawl	307	307	148	148	127	131	238	242	158	174	351	351	224	224	246	250	140	144	225	225	122	122	90	94	168	168	115	115	181	197	140	144	260	370	359	363	356	356	346	352	193	197	173	175	222	224	154	156
HF17SS-160	Trawl	311	327	124	148	131	143	242	246	126	166	319	367	240	244	222	234	144	144	217	221	116	124	90	90	172	184	115	121	181	195	146	160	210	250	365	367	336	368	346	346	197	197	173	173	220	222	154	156
HF17SS-162	Trawl	275	303	148	152	127	187	246	262	114	130	315	319	224	236	238	242	140	144	217	229	122	122	90	126	168	236	115	121	181	195	134	164	280	290	359	359	340	356	346	352	193	195	173	173	220	220	154	156
HF17SS-163	Trawl	275	287	124	132	135	167	238	242	166	174	343	355	232	236	222	226	140	140	197	213	116	118	90	90	188	192	115	115	181	193	136	150	240	260	359	363	368	368	346	352	197	197	173	175	220	220	154	156
HF17SS-164	Trawl	251	275	124	124	143	167	250	254	110	150	319	339	244	244	246	250	144	144	213	213	118	118	98	98	192	200	115	121	181	197	142	146	260	280	359	363	364	368	360	360	191	191	173	173	220	220	150	154
HF17SS-165	Trawl	291	319	124	148	131	135	238	238	162	190	331	363	232	244	206	234	140	144	217	237	116	120	90	90	168	204	115	123	181	191	118	160	210	250	359	365	356	360	352	360	197	201	173	173	220	220	154	154
HF17SS-166	Trawl	279	315	148	148	135	171	242	258	178	190	279	359	244	244	234	234	140	140	221	221	118	118	126	130	188	192	115	123	187	197	134	134	230	260	359	363	324	326	360	360	191	197	173	175	220	222	156	156
HF17SS-167	Trawl	275	283	148	152	131	135	238	250	122	214	307	375	249	249	222	250	140	144	229	237	118	120	90	126	168	180	103	107	181	195	138	146	250	260	359	363	336	344	346	346	191	193	173	177	222	222	154	158
HF17SS-168	Trawl	295	335	124	136	123	167	0	0	162	170	339	363	224	224	214	234	140	144	213	217	118	120	90	94	164	204	115	121	181	197	140	144	210	280	359	359	336	360	346	360	193	195	173	173	220	222	154	156
HF17SS-169	Trawl	339	339	124	168	123	139	238	262	170	182	323	323	232	236	206	218	140	140	203	217	118	120	78	114	176	260	115	115	187	191	142	148	230	260	359	359	324	360	346	346	191	195	173	173	212	222	168	174
HF17SS-170	Trawl	275	339	124	152	123	135	238	250	174	190	351	355	224	224	214	222	140	144	217	229	116	118	0	0	168	260	115	123	189	193	134	148	210	260	359	367	326	360	346	346	191	193	173	175	220	222	154	156
HF17SS-171	Trawl	315	323	152	156	127	147	238	238	158	166	315	323	216	224	222	234	140	144	221	241	118	120	90	126	176	204	103	123	191	193	146	164	210	260	359	367	336	364	346	360	189	193	173	175	222	222	156	160
HF17SS-172	Trawl	287	303	124	136	131	135	242	270	162	186	355	371	224	244	242	250	144	146	213	233	118	118	90	114	172	192	107	121	187	197	146	148	210	260	359	359	344	368	346	346	191	193	173	175	220	222	154	156
HF17SS-173	Trawl	267	299	124	148	127	147	266	282	158	170	339	351	224	244	242	250	140	140	217	221	118	118	86	90	168	172	103	115	187	195	142	146	210	230	359	365	324	366	346	346	191	197	173	173	220	222	154	172
HF17SS-174	Trawl	263	323	136	144	123	143	230	258	150	190	335	379	244	244	230	242	140	144	213	221	116	118	94	94	168	192	115	115	191	195	140	142	230	360	359	363	356	360	346	360	193	193	173	175	220	222	156	160
HF17SS-175	Trawl	267	303	124	144	131	143	238	254	158	166	319	355	244	244	242	242	140	140	233	233	118	122	86	90	188	188	115	115	187	193	140	160	210	260	359	359	332	348	346	360	193	197	173	173	220	220	156	156
HF17SS-176	Trawl	315	343	132	148	127	127	0	0	194	198	311	335	228	249	234	238	140	140	0	0	118	118	0	0	176	196	115	121	195	195	118	146	250	260	359	363	336	364	346	352	197	201	173	173	220	220	158	158
HF17SS-177	Trawl	275	311	124	148	139	159	238	258	146	150	347	355	236	249	222	246	140	144	197	237	112	118	90	98	168	192	115	121	181	195	148	148	240	260	359	361	326	352	346	346	191	197	173	177	220	222	154	156
HF17SS-178	Trawl	287	307	136	148	131	143	242	242	134	178	343	351	232	236	234	250	140	146	201	229	116	118	90	134	184	204	115	121	191	195	134	160	230	360	359	365	360	376	346	346	193	197	173	173	212	222	154	156
HF17SS-179	Trawl	303	339	132	148	127	147	238	254	186	186	347	351	232	249	218	250	140	144	217	217	118	120	90	98	184	200	115	121	187	191	148	154	260	290	363	367	352	356	346	352	191	193	173	173	220	226	154	156
HF17SS-180	Trawl	295	295	124	160	131	135	238	250	162	186	335	363	224	244	234	238	140	140	213	235	120	120	118	126	176	192	103	121	187	197	140	160	260	260	359	363	352	360	346	346	191	191	173	173	210	220	156	160
HF17SS-181	Trawl	287	315	132	152	131	179	242	254	134	154	319	331	232	232	226	246	140	140	209	213	118	120	86	106	168	184	115	115	197	197	118	146	230	250	359	365	316	328	346	352	195	197	173	173	220	222	158	158
HF17SS-184	Trawl	307	311	124	132	163	179	238	242	174	178	319	331	224	236	206	246	140	140	217	229	116	118	86	90	188	256	115	123	195	197	140	148	210	290	359	359	340	368	346	360	193	197	173	173	220	222	156	174
HF17SS-185	Trawl	291	343	132	148	127	127	0	0	182	194	311	331	249	249	230	234	140	144	217	217	118	118	94	126	168	196	115	121	193	195	118	150	250	260	359	359	336	364	346	352	191	193	173	173	220	220	158	158
HF17SS-186	Trawl	275	299	132	144	127	183	238	238	118	158	303	355	236	249	218	234	140	140	213	217	116	118	90	134	192	204	115	121	181	189	142	164	210	290	359	363	0	0	346	346	195	197	168	173	212	222	152	154
HF17SS-187	Trawl	295	331	128	132	127	147	238	270	186	198	299	319	224	224	238	250	140	144	209	229	116	118	94	98	172	200	107	121	181	195	118	142	210	290	359	363	336	372	346	360	193	197	173	173	222	222	156	168
HF17SS-188	Trawl	311	339	124	124	143	159	246	250	154	202	315	363	244	244	230	238	140	144	217	217	118	118	98	98	168	168	107	115	181	197	118	148	230	260	359	365	356	364	346	346	193	197	173	173	222	222	156	156
HF17SS-189	Trawl	299	307	132	152	131	143	238	254	150	166	335	355	224	244	210	226	140	144	209	217	116	122	90	90	168	192	103	115	197	197	144	146	230	240	363	363	356	360	346	346	191	197	173	179	222	222	156	156
HF17SS-191	Trawl	319	335	132	152	131	139	238	246	194	214	303	371	228	244	234	254	144	144	229	229	116	118	90	114	188	196	117	123	187	191	140	160	230	260	359	367	348	376	346	346	193	197	173	175	212	222	154	156
HF17SS-192	Trawl	283	287	124	132	127	143	238	238	178	194	331	363	224	232	202	234	140	144	0	0	118	120	90	102	192	208	115	121	181	189	140	148	260	290	363	363	368	380	346	360	191	197	173	173	216	222	154	154
HF17SS-193	Trawl	295	323	144	152	127	143	238	242	182	198	331	363	224	244	230	238	140	144	0	0	118	122	94	98	200	200	115	115	181	197	140	164	240	250	363	365	0	0	348	360	197	197	173	175	220	222	154	170
HF17SS-194	Trawl	323	335	152	164	139	163	250	258	186	190	327	331	216	224	226	230	140	144	0	0	118	122	90	102	184	192	115	121	189	197	118	118	260	290	360	359	340	360	346	360	191	193	173	173	210	220	158	168
HF17SS-195	Trawl	291	315	132	148	127	131	238	246	170	182	339	339	224	236	234	238	144	144	217	217	116	124	90	98	188	236	103	115	187	195	134	134	260	370	359	363	0	0	346	360	191	193	173	173	220	222	154	156
HF17SS-196	Trawl	275	311	152	152	163	171	238	238	166	170	303	339	236	244	226	230	140	140	197	233	118	120	90	90	256	264	115	121	197	197	138	158	210	240	359	359	340	372	346	360	193	197	173	175	222	222	156	156
HF17SS-197	Trawl	283	339	132	132	143	143	238	238	154	178	347	395	224	224	222	234	140	144	217	217	118	118	90	90	204	212	115	115	193	197	134	148	240	250	363	365	332	356	346	346	191	191	173	173	220	222	154	156
HF17SS-199	Trawl	271	315	148	148	143	199	0	0	154	182	311	371	228	236	234	238	140	140	229	237	116	118	118	118	184	192	115	121	181	195	146	164	250	280	359	367	340	360	346	360	195	197	173	173	220	220	154	156
HF17SS-200	Trawl	275	311	124	132	123	127	242	270	170	202	327	331	244	250	234	234	140	140	225	225	116	120	94	94	196	240	103	121	181	187	134	140	260	360	359	359	340	364	346	346	193	195	173	177	220	226	154	156
HF17SS-201	Trawl	279	299	128	136	131	167	246	250	138	154	319	351	244	244	222	242	140	140	217	221	118	120	90	90	168	168	115	115	181	193	134	144	280	290	363	363	326	356	346	346	195	197	173	173	220	220	154	156
HF17SS-202	Trawl	267	295	124	132	127	143	238	238	174	190	323	355	244	248	206	246	140	144	217	217	112	120	102	126	188	196	103	115	191	195	118	142	250	260	359	363	340	360	346	360	193	195	173	175	220	222	154	160
HF17SS-203	Trawl	275	299	128	132	127	143	238	262	166	170	335	367	224	224	222	242	140	144	201	225	116	118	90	130	188	240	115	121	195	199	118	160	250	280	359	359	322	336	346	346	195	197	173	173	210	222	160	166
HF17SS-204	Trawl	279	355	148	148	131	195	238	254	178	198	299	355	244	249	246	246	140	140	217	233	118	120	90	90	188	244	115	121	187	195	118	146	210	240	357	361	364	372	346	348	191	197	173	175	212	222	156	156
HF17SS-205	Trawl	295	311	124	132	127	183	238	254	178	182	319	331	244	248	234	250	144	144	213	225	120	122	66	90	188	200	121	121	187	195	160	160	260	370	365	365	364	364	346	346	191	193	173	173	220	222	166	168
HF17SS-206	Trawl	295	351	128	136	131	167	242	242	178	190	343	343	224	244	238	238	140	144	217	233	118	120	90	90	192	204	115	123	189	189	142	148	210	240	359	363	364	380	346	346	191	199	173	175	222	224	156	168
HF17SS-207	Trawl	287	295	124	148	131	163	238	250	178	182	351	359	232	244	230	238	140	140	217	217	116	118	90	102	192	196	121	121	195	195	118	146	210	260	361	363	336	352	346	346	193	197	173	173	222	222	154	158
HF17SS-209	Trawl	283	339	128	152	135	143	238	254	146	182	331	371	224	244	210	250	140	144	217	233	118	118	94	94	180	192	103	115	189	193	146	146	210	360	359	365	360	372	346	346	191	193	168	173	220	220	152	158
HF17SS-210	Trawl	291	307	132	148	127	143	242	254	142	158	351	363	244	248	230	234	140	140	209	213	122	122	90	126	196	212	115	121	181	187	140	146	210	240	363	365	340	372	352	360	191	197	173	173	218	222	154	160
HF17SS-212	Trawl	299	303	124	144	143	143	242	246	114	210	343	343	244	244	250	250	140	144	221	225	118	118	90	102	168	172	103	115	181	181	134	140	260	260	363	367	356	372	346	360	191	197	173	173	220	222	154	172
HF17SS-213	Trawl	299	311	136	164	131	143	238	250	154	182	331	355	224	236	222	254	140	140	203	209	118	122	90	98	180	192	103	115	187	193	140	146	260	260	359	360	336	364	346	360	197	197	173	173	210	220	156	160
HF17SS-214	Trawl	255	307	144	148	167	183	238	242	142	162	339	363	224	244	234	254	140	140	217	221	118	120	90	90	192	248	121	121	191	195	142	158	210	290	360	365	336	340	352	360	193	197	173	173	212	220	156	158
HF17SS-218	Trawl	307	323	148	164	143	195	254	266	142	178	343	363	224	232	218	230	140	144	213	217	116	120	90	90	188	228	115	121	183	195	142	148	230	240	359	359	332	364	346	360	195	197	173	175	222	222	156	168
HF17SS-219	Trawl	283	311	148	152	131	167	238	250	122	174	347	355	232	232	226	246	140	144	203	209	118	120	90	94	168	196	103	115	181	181	140	144	230	260	0	0	0	0	346	360	197	197	173	173	220	222	156	168
HF17SS-220	Trawl	263	283	148	148	127	131	238	242	154	194	351	363	224	244	234	250	140	144	217	221	116	118	66	94	168	196	103	107	181	195	134	140	290	290	359	367	332	340	346	352	193	197	173	173	212	220	156	156
HF17SS-221	Trawl	295	315	148	168	127	163	238	246	150	154	319	343	224	252	238	250	140	144	217	217	118	120	94	98	172	188	115	121	181	187	142	150	260	260	363	367	352	368	346	348	193	197	173	177	220	222	156	172
HF17SS-222	Trawl	291	315	124	152	131	143	242	250	178	190	303	363	224	249	234	246	140	144	203	225	116	118	90	114	168	188	115	121	191	197	142	146	230	290	359	359	356	360	346	346	191	191	173	175	222	222	156	156
HF17SS-223	Trawl	267	275	136	148	123	143	238	242	110	134	323	351	232	248	254	254	140	140	217	225	120	120	98	114	176	192	115	121	189	191	144	146	230	280	359	367	332	340	346	346	193	195	173	173	210	222	156	156
HF17SS-224	Trawl	275	331	132	148	147	163	246	266	138	162	343	343	236	249	234	234	140	144	209	229	116	118	98	106	204	248	115	123	189	197	138	160	210	250	359	365	356	360	346	360	193	193	173	173	222	222	154	156
HF17SS-226	Trawl	295	315	124	164	143	183	238	258	158	198	307	311	224	236	222	234	140	144	217	245	120	120	102	134	176	196	115	121	193	193	140	164	230	280	363	365	360	360	352	360	193	197	173	181	222	226	156	156
HF17SS-227	Trawl	311	319	124	136	131	135	238	250	166	194	327	363	249	249	230	238	140	144	217	221	118	118	94	118	248	260	115	121	197	213	144	160	210	230	0	0	324	356	352	352	0	0	173	173	220	222	0	0
HF17SS-228	Trawl	283	311	148	148	127	131	242	258	142	178	319	367	224	249	234	246	140	144	213	217	118	120	90	90	180	188	115	123	191	193	118	118	230	290	359	359	360	384	346	346	191	193	173	173	210	222	154	156
HF17SS-229	Trawl	291	291	164	164	159	187	238	238	142	206	339	351	224	232	206	238	140	140	217	229	112	116	90	90	184	212	115	121	183	197	146	148	210	230	359	367	336	360	346	352	197	201	173	173	220	226	154	154
HF17SS-230	Trawl	323	331	124	128	131	143	238	238	162	198	331	351	224	244	230	242	140	144	197	237	118	120	86	114	168	192	103	121	193	197	140	142	230	260	359	363	328	368	346	360	197	201	173	173	222	226	156	156
HF17SS-231	Trawl	291	295	132	144	131	139	238	242	170	182	331	363	224	244	230	238	144	146	217	221	112	122	90	98	200	200	115	121	195	197	164	164	250	260	363	367	344	352	348	352	195	197	173	175	220	222	154	154
HF17SS-232	Trawl	299	303	132	152	127	191	238	250	146	182	339	355	244	244	234	250	140	140	209	229	118	120	86	94	188	192	103	115	189	191	140	146	240	360	363	363	328	366	346	346	193	197	173	173	222	226	160	168
HF17SS-233	Trawl	299	299	124	148	159	183	0	0	126	182	327	355	244	252	238	250	140	140	217	225	118	120	90	126	208	256	115	121	195	195	136	142	260	260	359	365	340	360	346	346	191	193	173	173	222	222	154	156
HF17SS-234	Trawl	283	283	124	152	143	143	238	258	162	166	307	351	224	232	238	250	140	144	197	217	118	118	90	114	196	196	115	115	179	193	146	146	260	260	0	0	348	380	346	352	0	0	173	173	222	222	0	0
HF17SS-235	Trawl	287	323	132	136	127	127	242	246	162	166	307	331	224	249	218	238	144	146	217	233	118	120	90	118	188	188	115	121	181	181	134	158	210	240	365	367	340	360	346	346	191	197	173	173	220	222	152	156
HF17SS-237	Trawl	283	295	124	160	127	163	238	242	150	198	315	343	224	244	222	250	140	140	221	221	120	120	90	114	176	192	115	115	197	197	118	142	260	260	359	359	328	340	346	352	191	193	173	177	222	222	154	156
HF17SS-238	Trawl	295	303	124	148	131	135	238	250	150	150	311	355	248	248	242	242	144	144	229	237	116	120	94	94	172	184	115	115	187	187	146	158	230	240	359	359	336	356	346	360	197	197	173	173	222	222	154	156
HF17SS-240	Trawl	279	299	148	148	127	131	258	258	166	202	299	347	224	244	226	262	140	140	213	233	118	120	94	114	168	196	115	121	195	199	134	134	260	260	359	361	0	0	346	360	197	197	173	173	222	222	156	156
HF17SS-241	Trawl	291	331	148	156	127	195	238	250	142	182	315	367	240	252	218	226	140	140	225	233	120	120	90	102	168	172	115	115	193	195	142	160	210	240	359	367	340	360	346	346	193	201	173	173	220	222	154	156
HF17SS-242	Trawl	287	299	128	152	123	143	250	250	158	166	339	351	236	244	242	254	140	140	0	0	116	118	0	0	168	196	103	115	181	195	142	160	210	240	0	0	326	368	352	360	0	0	173	173	212	222	0	0
HF17SS-243	Trawl	287	311	124	152	123	147	238	238	166	186	379	391	249	252	230	242	140	146	217	229	116	118	90	110	180	196	115	115	181	187	136	158	260	260	359	359	360	372	360	360	191	197	173	173	212	222	154	156
HF17SS-244	Trawl	279	307	132	148	123	127	238	258	122	182	319	367	240	252	202	250	140	144	217	221	118	118	90	130	184	256	115	121	195	195	146	158	230	260	363	363	340	348	346	346	195	197	173	173	210	222	154	172
HF17SS-245	Trawl	291	307	148	148	127	135	242	246	186	186	351	367	224	232	226	254	140	140	221	229	116	118	90	90	168	188	115	115	187	211	146	160	280	370	359	365	320	336	346	346	197	197	173	173	210	222	156	170
HF17SS-247	Trawl	255	303	132	152	167	171	238	238	182	186	347	355	224	249	234	234	140	140	213	233	118	118	90	98	184	188	115	121	189	197	142	148	210	260	359	359	336	362	360	360	193	197	173	173	222	222	154	156
HF17SS-248	Trawl	307	327	132	164	143	159	242	250	166	182	319	355	244	248	234	238	140	140	217	225	120	124	90	114	192	200	107	121	191	195	142	148	260	280	363	363	352	364	346	346	193	197	168	173	220	222	160	172
HF17SS-250	Trawl	275	287	124	124	143	147	250	250	170	182	359	359	232	232	234	234	140	140	0	0	118	118	90	102	168	176	103	115	181	197	134	142	210	290	359	363	322	336	0	0	191	197	168	173	222	222	152	156
HF17SS-251	Trawl	0	0	152	152	127	159	238	238	178	198	367	371	224	232	230	242	140	144	217	217	118	122	90	90	172	200	115	115	181	201	146	148	230	230	359	359	340	364	346	346	191	197	173	173	212	222	168	170
HF17SS-254	Trawl	239	295	124	148	0	0	0	0	0	0	0	0	224	244	214	234	140	144	0	0	118	118	0	0	176	192	109	115	191	197	142	154	260	290	0	0	364	368	344	352	193	195	173	173	220	222	154	156
HF17SS-255	Trawl	0	0	132	136	0	0	0	0	0	0	0	0	224	224	238	254	140	144	0	0	118	118	70	78	192	224	115	123	193	193	146	146	250	290	363	363	328	356	346	346	197	201	173	173	220	226	154	168
HF17SS-256	Trawl	283	323	124	148	143	147	238	250	154	210	315	323	224	244	238	258	140	140	0	0	0	0	90	90	188	200	115	117	191	197	138	140	260	290	359	365	332	332	0	0	191	191	173	173	220	222	154	156
[truncated: 29 more rows]
[truncated: 12 more columns]

## Sheet: Reporting groups file
Reporting groups: Outlier/Inner/Middle/Outer
Oselva	Outlier
Tysse	Outlier
[truncated: 11 more rows]

## Sheet: Fisheries file
Realistic mixture file:
[truncated: 4 more rows]

[truncated: 15 more sheets: Baseline mixture file, 2017 week 19, 2017 week 20, 2017 week 21, 2017 week 22, 2016 week 18 & 19, 2016 week 20, 2016 week 21, 2016 week 22 & 23, 2015 week 19, 2015 week 20, 2015 week 21 & 22, 2015 week 23 & 24, 2013 week 21, 2013 week 22-27]
